# Supplementary material for: Methacrylate Coatings for Titanium Surfaces to Optimize Biocompatibility
Source: MDPI journal article supplement (doi:10.3390/mi11010087), 2020-01-13
Supplement: s1 [file s1]

## Supplemental Files

---

### **Descriptor Files**

S1-S15

Descriptors calculated for proteins and methacrylated variants, the proteins are labelled with their PDB abbreviations.

### **Clinical and Lab Data**

S16-S17

In vivo patient data from different protein coatings [20,21]

S18a&b

Data from antimicrobial peptides [19] cleaned for PCA using S19

### **Machine Learning Algorithm**

S19

PCA script using Sci-kit learn with truncated and cleaned dataset
