# Supplementary material for: Methacrylate Coatings for Titanium Surfaces to Optimize Biocompatibility
Source: Micromachines (Basel). 2020 Jan 13;11(1):87. doi: 10.3390/mi11010087 (PMC7019220; doi:10.3390/mi11010087)
Supplement: Supplementary file 1 [file micromachines-11-00087-s001.zip]

Archive with 24 entries (24 files):
- S2.csv
- S3.csv
- S4.csv
- S5.csv
- S6.csv
- S7.csv
- S8.csv
- S9.csv
- S10.csv
- S11.csv
- S12.csv
- S13.csv
- S14.csv
- S15.csv
- S16.xlsx
- S17.xlsx
- S18a.xlsx
- S18b.csv
- S1.csv
- Supplemental Files.pdf
- S19/ChemoInformaticsData_mod_bact_tr.csv
- S19/ChemoInformaticsData_mod_bact_pred.csv
- S19/DescrPCA.py
- S19/DescrOptMLR.py
