# Supplementary material for: Methacrylate Coatings for Titanium Surfaces to Optimize Biocompatibility
Source: Micromachines (Basel). 2020 Jan 13;11(1):87. doi: 10.3390/mi11010087 (PMC7019220; doi:10.3390/mi11010087)
Supplement: Supplementary file 1 [file micromachines-11-00087-s001.zip › S1.csv]

Chain	Res	UID	res_ASA	res_exp	res_charge	propKa	res_hyd	res_pos	res_neg	res_tot	res_oth	ens_res_charge	ens_sc_pKa	ens_bb_pKa
1AO6.A	SER	5	38.2	26.21	1.72	7.79				33.2	33.2	1
1AO6.A	GLU	6	59.8	28.82	-1.05	4.07			23.9	50.4	26.6	-1
1AO6.A	VAL	7			-0.06
1AO6.A	ALA	8			0.05					1.3	1.3
1AO6.A	HIS	9	80.4	36.57	0.15	6.53			10.1	68.6	58.4
1AO6.A	ARG	10	27.2	10.07	1.04				7.2	31.6	24.4	1
1AO6.A	PHE	11	20.1	7.67	0.03		14.8			21.3	6.5
1AO6.A	LYS	12	130.6	55.48	1.03	10.43	8.3		8.7	95.7	78.7	1
1AO6.A	ASP	13	78	44.13	-1.07	4.82			51.4	53.8	2.5	-1
1AO6.A	LEU	14	29.4	12.94	-0.03		7.4		1.8	30.2	21.1
1AO6.A	GLY	15	30.9	30.76	0.06					21.6	21.6
1AO6.A	GLU	16	66.6	32.1	-1.05	4.09	0.6			52	51.4	-1
1AO6.A	GLU	17	146.5	70.63	-1.05	4.5			41.8	85.9	44.2	-1
1AO6.A	ASN	18	29.4	17.02	0.05		0.1			47.7	47.6
1AO6.A	PHE	19			0.03
1AO6.A	LYS	20	46	19.54	1.03	10.43	0.8	28.2		52.3	23.4	1
1AO6.A	ALA	21	18.8	13.68	0.05		3.7			18.7	15
1AO6.A	LEU	22			-0.03		1.6			1.6
1AO6.A	VAL	23			-0.06
1AO6.A	LEU	24	0.9	0.38	-0.03		9.8			11.3	1.5
1AO6.A	ILE	25			-0.04
1AO6.A	ALA	26			0.05					2.8	2.8
1AO6.A	PHE	27			0.03
1AO6.A	ALA	28			0.05
1AO6.A	GLN	29	1.7	0.87	0.02					2.4	2.4
1AO6.A	TYR	30	0.9	0.32	0.03	12.28				6.9	6.9
1AO6.A	LEU	31			-0.03					7.2	7.2
1AO6.A	GLN	32	2.2	1.08	0.02					17.8	17.8
1AO6.A	GLN	33	68.7	34.39	0.02			3.4		76.3	72.9
1AO6.A	CYS	34			-0.03	8.31				0.5	0.5
1AO6.A	PRO	35	65.6	38.21	-0.16			0.1		47.5	47.5
1AO6.A	PHE	36	6.2	2.36	0.03			3.9		27.2	23.3
1AO6.A	GLU	37	118.3	57.02	-1.05	4.44				79.6	79.6	-1
1AO6.A	ASP	38	49.5	28.02	-1.08	3.94				34.6	34.6	-1
1AO6.A	HIS	39			0.03	2.51
1AO6.A	VAL	40	31.3	16.01	-0.06		0.4	0.7		32.2	31
1AO6.A	LYS	41	107.8	45.78	1.03	10.15				78.7	78.7	1
1AO6.A	LEU	42			-0.03
1AO6.A	VAL	43			-0.06		6.6			10.9	4.3
1AO6.A	ASN	44	68.3	39.54	0.05			12		59.7	47.6
1AO6.A	GLU	45	49.4	23.8	-1.05	3.46			0.2	50.6	50.4	-1
1AO6.A	VAL	46	3.1	1.6	-0.06					8.4	8.4
1AO6.A	THR	47	2.6	1.49	0			0		9.9	9.9
1AO6.A	GLU	48	126.2	60.84	-1.05	4.5			44.1	79.3	35.1	-1
1AO6.A	PHE	49	44.6	17.01	0.03					52.3	52.3
1AO6.A	ALA	50			0.05
1AO6.A	LYS	51	92.3	39.21	1.03	10.29	9.1			76.3	67.2	1
1AO6.A	THR	52	76.1	43.63	0					58.3	58.3
1AO6.A	CYS	53			0.05
1AO6.A	VAL	54	41.4	21.18	-0.06		13.2			42.7	29.5
1AO6.A	ALA	55	98	71.4	0.05				11	57.2	46.2
1AO6.A	ASP	56	77	43.61	-1.08	3.25			36.8	49.3	12.5	-1
1AO6.A	GLU	57	82.1	39.6	-1.05	4.22				68.3	68.3	-1
1AO6.A	SER	58	108.1	74.13	-0.01				20.2	63.3	43.1
1AO6.A	ALA	59	32	23.35	0.05				8.7	32.6	24
1AO6.A	GLU	60	172	82.93	-1.05	4.57			46.6	97.7	51.2	-1
1AO6.A	ASN	61	42.1	24.4	0.05				2.9	38	35.1
1AO6.A	CYS	62			0.05					1.9	1.9
1AO6.A	ASP	63	128.5	72.77	-1.08	3.38			42.3	79	36.7	-1
1AO6.A	LYS	64	59.8	25.41	1.03	10.22			0.7	62.1	61.4	1
1AO6.A	SER	65	54.5	37.37	-0.01					43.1	43.1
1AO6.A	LEU	66	5.2	2.28	-0.03				3.9	26.2	22.3
1AO6.A	HIS	67	19.8	9.01	0.33	7.04			4.6	46.3	41.7
1AO6.A	THR	68	32.1	18.39	0					28.3	28.3
1AO6.A	LEU	69	15.9	6.99	-0.03					24.3	24.3
1AO6.A	PHE	70	1.7	0.66	0.03					16.7	16.7
1AO6.A	GLY	71	1.1	1.08	0.06					6.1	6.1
1AO6.A	ASP	72	68.5	38.78	-1.08	2.99				49.5	49.5	-1
1AO6.A	LYS	73	48.6	20.63	1.03	10.15				38.1	38.1	1
1AO6.A	LEU	74			-0.03					2.5	2.5
1AO6.A	CYS	75	20.5	13.11	0.05					21.5	21.5
1AO6.A	THR	76	86.8	49.74	0					63.7	63.7
1AO6.A	VAL	77	25.3	12.96	-0.06		9.1			30.5	21.4
1AO6.A	ALA	78			0.05
1AO6.A	THR	79	82.1	47.06	0					56.1	56.1
1AO6.A	LEU	80	122.3	53.88	-0.03		49.3			79.7	30.4
1AO6.A	ARG	81	183.7	68.02	1.04	12.5		46.9		110.3	63.4	1
1AO6.A	GLU	82	196.4	94.7	-1.05	4.5			39	108.3	69.4	-1
1AO6.A	THR	83	85	48.72	0					60.2	60.2
1AO6.A	TYR	84	7.7	2.93	0.03					28.8	28.8
1AO6.A	GLY	85	31.2	31.09	0.06					29.4	29.4
1AO6.A	GLU	86	147.3	71	-1.05	4.5			38.5	92.5	54	-1
1AO6.A	MET	87	19.1	7.8	0					33	33
1AO6.A	ALA	88	8.6	6.23	0.05				0.9	18.5	17.6
1AO6.A	ASP	89	101.4	57.41	-1.08	3.87			38.2	66.9	28.7	-1
1AO6.A	CYS	90			0.05
1AO6.A	CYS	91	26.4	16.89	0.05					26	26
1AO6.A	ALA	92	92.3	67.22	0.05					56.2	56.2
1AO6.A	LYS	93	88.6	37.62	1.03	10.36		32.3		75.8	43.5	1
1AO6.A	GLN	94	150.3	75.2	0.02				1.2	93.8	92.6
1AO6.A	GLU	95	39.5	19.02	-1.05	3.34			9.9	46.3	36.4	-1
1AO6.A	PRO	96	101.2	58.93	-0.16				10.5	71.9	61.4
1AO6.A	GLU	97	87.7	42.3	-1.05	4.16			36.8	61.7	24.9	-1
1AO6.A	ARG	98	13.3	4.94	1.04	11.38				22.2	22.2	1
1AO6.A	ASN	99	0.9	0.5	0.05					10.5	10.5
1AO6.A	GLU	100	96.1	46.31	-1.05	4.57			32.9	67.6	34.7	-1
1AO6.A	CYS	101			0.05					1.9	1.9
1AO6.A	PHE	102	1.7	0.65	0.03					8.8	8.8
1AO6.A	LEU	103	18.7	8.24	-0.03					27.2	27.2
1AO6.A	GLN	104	137.7	68.91	0.02			5.7	12.2	89.3	71.4
1AO6.A	HIS	105	41.1	18.71	0.03	4.97			4	55.7	51.7
1AO6.A	LYS	106	13.8	5.88	0.63	7.57			13.9	16.7	2.8	1
1AO6.A	ASP	107	37.8	21.38	-1.08	3.11			0.5	37.6	37.1	-1
1AO6.A	ASP	108	23.7	13.43	-1.08	2.75			9.1	43.7	34.6	-1
1AO6.A	ASN	109	66.3	38.41	0.05				13.6	57.7	44.1
1AO6.A	PRO	110	12.9	7.53	-0.16					23.6	23.6
1AO6.A	ASN	111	132.6	76.78	0.05					75.2	75.2
1AO6.A	LEU	112	25.8	11.39	-0.03			0.8		30.9	30.1
1AO6.A	PRO	113	114.4	66.64	-0.16			1.1		64.5	63.4
1AO6.A	ARG	114	183.1	67.78	1.04	12.29				147.3	147.3	1
1AO6.A	LEU	115	89	39.21	-0.03		30.4			86	55.6
1AO6.A	VAL	116	116.7	59.72	-0.06					84.6	84.6
1AO6.A	ARG	117	80.7	29.88	1.04	11.94	2.7			95.4	92.6	1
1AO6.A	PRO	118	56.1	32.65	-0.16		16.8			55.9	39.1
1AO6.A	GLU	119	139.3	67.15	-1.05	4.57			36.8	76.7	40	-1
1AO6.A	VAL	120	9.8	5.01	-0.06		4			22.4	18.4
1AO6.A	ASP	121	81.1	45.89	-1.08	3.07			29.2	55.9	26.7	-1
1AO6.A	VAL	122	81.2	41.53	-0.06		24.9		0.4	53.9	28.7
1AO6.A	MET	123	20	8.18	0		12.1			26.7	14.6
1AO6.A	CYS	124	3.3	2.1	0.05					9.5	9.5
1AO6.A	THR	125	103	59.08	0					63.8	63.8
1AO6.A	ALA	126	43.3	31.56	0.05		5.2			35.5	30.3
1AO6.A	PHE	127	1.7	0.65	0.03					4.1	4.1
1AO6.A	HIS	128	101.5	46.15	0.25	6.84			12.4	80.8	68.4
1AO6.A	ASP	129	133.8	75.72	-1.08	3.87			57.4	78.2	20.8	-1
1AO6.A	ASN	130	73	42.27	0.05				0.8	57.6	56.9
1AO6.A	GLU	131	54.4	26.24	-1.05	4.63			29.7	49	19.3	-1
1AO6.A	GLU	132	113.7	54.81	-1.05	4.5		0.6	45.3	85.8	40	-1
1AO6.A	THR	133	55.9	32.07	0			6		47.1	41.1
1AO6.A	PHE	134	18	6.88	0.03		13.3			28.8	15.5
1AO6.A	LEU	135	25	11.02	-0.03		14.7			29.2	14.5
1AO6.A	LYS	136	34.9	14.81	1.03	10.27	7.2	39.9		69.5	22.5	1
1AO6.A	LYS	137	94.7	40.21	1.03	10.43				79.7	79.7	1
1AO6.A	TYR	138	17.5	6.63	0.03	11.97	17.5			39.3	21.8
1AO6.A	LEU	139	6.1	2.69	-0.03		17.6			19.2	1.6
1AO6.A	TYR	140	4.6	1.75	0.01	9.21		6.2		11.5	5.3
1AO6.A	GLU	141	12.3	5.95	-1.05		2.8			21.1	18.2	-1
1AO6.A	ILE	142	16	7.18	-0.04		34.6			40.4	5.8
1AO6.A	ALA	143			0.05
1AO6.A	ARG	144	21.6	7.99	1.04			18.9		23.3	4.3	1
1AO6.A	ARG	145	43.7	16.17	1.04	11.21		2.2		53.2	51	1
1AO6.A	HIS	146	38.3	17.43	0.03	2.69	1.7	7.3		47.8	38.8
1AO6.A	PRO	147	2.9	1.66	-0.16					7.6	7.6
1AO6.A	TYR	148	16.7	6.32	0.03	11.15			0.1	37.1	37.1
1AO6.A	PHE	149	1	0.37	0.03		3.6			7.3	3.7
1AO6.A	TYR	150	9.4	3.55	0.02	9.64		10.9		22.8	11.9
1AO6.A	ALA	151			0.05					1.8	1.8
1AO6.A	PRO	152	3.2	1.89	-0.16		1.6			10.3	8.7
1AO6.A	GLU	153	7.2	3.48	-1.05				6.8	13.6	6.8	-1
1AO6.A	LEU	154			-0.03		0.8			0.8
1AO6.A	LEU	155	8.2	3.61	-0.03		11			21.2	10.2
1AO6.A	PHE	156	17.7	6.76	0.03					22	22
1AO6.A	PHE	157	0.9	0.33	0.03		4.4		3.5	11.8	3.9
1AO6.A	ALA	158	8	5.85	0.05		4.6			13.3	8.7
1AO6.A	LYS	159	73.9	31.38	1.03	9.94		19.3		67.3	48	1
1AO6.A	ARG	160	63.8	23.62	1.04	13.84			0.4	63.6	63.1	1
1AO6.A	TYR	161	16.9	6.41	0.03	11.68	14.4			25.7	11.3
1AO6.A	LYS	162	69.6	29.57	1.03	10.43	0.5			62.6	62.1	1
1AO6.A	ALA	163	55.9	40.74	0.05					45.5	45.5
1AO6.A	ALA	164	2.6	1.88	0.05					9.6	9.6
1AO6.A	PHE	165			0.03
1AO6.A	THR	166	67.4	38.64	0				0.3	49.8	49.5
1AO6.A	GLU	167	109.6	52.84	-1.05	4.22				69.1	69.1	-1
1AO6.A	CYS	168			0.05
1AO6.A	CYS	169	11	7.05	0.05					10.8	10.8
1AO6.A	GLN	170	153.7	76.89	0.02					97.3	97.3
1AO6.A	ALA	171	35.3	25.73	0.05					34.4	34.4
1AO6.A	ALA	172	129.1	94.02	0.05					68.3	68.3
1AO6.A	ASP	173	93.2	52.73	-1.08	3.4				64.9	64.9	-1
1AO6.A	LYS	174	55.2	23.44	1.03	10.22				54.1	54.1	1
1AO6.A	ALA	175	48.4	35.28	0.05		11.8			40	28.2
1AO6.A	ALA	176	67.5	49.19	0.05					45.9	45.9
1AO6.A	CYS	177	29.2	18.7	0.05					30.3	30.3
1AO6.A	LEU	178			-0.03
1AO6.A	LEU	179	75	33.06	-0.03		33.5			56.1	22.6
1AO6.A	PRO	180	92	53.57	-0.16				3.8	58.9	55.1
1AO6.A	LYS	181	59.7	25.33	1.03	10.01				61.3	61.3	1
1AO6.A	LEU	182	2.5	1.12	-0.03		6.2			16.1	9.9
1AO6.A	ASP	183	35.1	19.84	-1.08	3.15				38.2	38.2	-1
1AO6.A	GLU	184	109	52.56	-1.05	4.5			54.6	89.3	34.7	-1
1AO6.A	LEU	185	2.5	1.12	-0.03		0.6			17.2	16.6
1AO6.A	ARG	186	107.6	39.85	1.04	12.68	1.2	49.7		104.3	53.4	1
1AO6.A	ASP	187	69.6	39.38	-1.08	1.45		0.2		58.9	58.7	-1
1AO6.A	GLU	188	51.9	25.03	-1.05				20.1	52.8	32.7	-1
1AO6.A	GLY	189			0.06		0.5			12.9	12.4
1AO6.A	LYS	190	49.8	21.14	0.03	6.23		62.1		88.4	26.3	1
1AO6.A	ALA	191	26.8	19.51	0.05			4.8		42.7	37.9
1AO6.A	SER	192	13.5	9.24	-0.01				1.2	26	24.8
1AO6.A	SER	193	10.5	7.2	-0.01					23.3	23.3
1AO6.A	ALA	194	18.5	13.46	0.05		2			36.9	34.9
1AO6.A	LYS	195	72.4	30.74	1.03	10.76	13.1	52.2		91.3	26	1
1AO6.A	GLN	196	4.7	2.33	0.02			7.2		18.1	10.8
1AO6.A	ARG	197	17.2	6.35	1.04				1.1	43.5	42.4	1
1AO6.A	LEU	198	10.3	4.54	-0.03		30.7			42.3	11.6
1AO6.A	LYS	199	21	8.92	0.57	7.47	4.2	28.2		42.2	9.8	1
1AO6.A	CYS	200			0.05					1	1
1AO6.A	ALA	201			0.05					9.8	9.8
1AO6.A	SER	202	3.1	2.14	-0.01					9.2	9.2
1AO6.A	LEU	203	15.9	7.03	-0.03					27	27
1AO6.A	GLN	204	83.5	41.77	0.02					79.4	79.4
1AO6.A	LYS	205	131.5	55.85	1.03	10.43	0.5			106.8	106.3	1
1AO6.A	PHE	206	58	22.14	0.03		18.1			52.7	34.6
1AO6.A	GLY	207	29.2	29.11	0.06					22	22
1AO6.A	GLU	208	96.9	46.7	-1.05	4.27				67.4	67.4	-1
1AO6.A	ARG	209	114.1	42.24	1.04	12.08		17.8		121.3	103.5	1
1AO6.A	ALA	210	20.5	14.91	0.05		2.6			26.7	24
1AO6.A	PHE	211			0.03		2.3			7.1	4.8
1AO6.A	LYS	212	68.4	29.06	1.03	10.43				61.9	61.9	1
1AO6.A	ALA	213	24.5	17.83	0.05		9.5			31.1	21.6
1AO6.A	TRP	214	38.8	12.46	0.02		48.2	13.2		71.2	9.7
1AO6.A	ALA	215			0.05
1AO6.A	VAL	216	8.4	4.32	-0.06					15	15
1AO6.A	ALA	217			0.05
1AO6.A	ARG	218	33.4	12.38	1.03	9.64	1.8	29.3		43.6	12.5	1
1AO6.A	LEU	219	8.7	3.84	-0.03		17			21.8	4.8
1AO6.A	SER	220			-0.01
1AO6.A	GLN	221			0.02					6.4	6.4
1AO6.A	ARG	222	25.9	9.59	0.63	7.56		32.7		47.4	14.7	1
1AO6.A	PHE	223	0.9	0.33	0.03		9			10.7	1.6
1AO6.A	PRO	224			-0.16					4.4	4.4
1AO6.A	LYS	225	88.6	37.61	1.03	9.8				81.6	81.6	1
1AO6.A	ALA	226			0.05					5.7	5.7
1AO6.A	GLU	227	125.2	60.38	-1.05	4.5			38.4	79.1	40.7	-1
1AO6.A	PHE	228	30.2	11.51	0.03		15.2			44.3	29.2
1AO6.A	ALA	229	82	59.72	0.05				1.6	57	55.4
1AO6.A	GLU	230	20.4	9.83	-1.05	3.98				25.5	25.5	-1
1AO6.A	VAL	231			-0.06
1AO6.A	SER	232	33.1	22.71	-0.01					38.6	38.6
1AO6.A	LYS	233	80.8	34.3	1.03	10.29				70.7	70.7	1
1AO6.A	LEU	234			-0.03		2.9			3.6	0.7
1AO6.A	VAL	235	3.9	2	-0.06					9.5	9.5
1AO6.A	THR	236	69.3	39.76	0					54.4	54.4
1AO6.A	ASP	237	24.4	13.81	-1.08	3.64				28.3	28.3	-1
1AO6.A	LEU	238	23.2	10.24	-0.03		22.8	7		30.8	0.9
1AO6.A	THR	239	5.4	3.08	0					13.6	13.6
1AO6.A	LYS	240	113.1	48.05	1.03	10.5			2.5	81.5	79	1
1AO6.A	VAL	241			-0.06
1AO6.A	HIS	242	3.8	1.72	0.03			9.2		9.4	0.3
1AO6.A	THR	243	48.9	28.03	0				1	43.8	42.8
1AO6.A	GLU	244	17.7	8.52	0.04	10.48			15.6	17.9	2.3	-1
1AO6.A	CYS	245	3	1.95	0.05					11.3	11.3
1AO6.A	CYS	246			0.05					9.3	9.3
1AO6.A	HIS	247	58.9	26.79	1.01	8.31			6	58.5	52.6
1AO6.A	GLY	248	2.6	2.62	0.06					2.3	2.3
1AO6.A	ASP	249	17.9	10.12	-1.08				27.9	31.1	3.2	-1
1AO6.A	LEU	250	1.1	0.49	-0.03					14.6	14.6
1AO6.A	LEU	251			-0.03					10	10
1AO6.A	GLU	252	25.2	12.13	-0.99	6.23			28.5	31.5	3	-1
1AO6.A	CYS	253			0.05
1AO6.A	ALA	254	4.4	3.17	0.05		4.1			13.9	9.7
1AO6.A	ASP	255	4.4	2.5	-1.08				14.1	14.4	0.3	-1
1AO6.A	ASP	256	22.6	12.82	-1.08	2.81			24.9	32.4	7.5	-1
1AO6.A	ARG	257	7.7	2.84	1.04	13.46	0.3	12.6		43.8	30.9	1
1AO6.A	ALA	258	18	13.14	0.05		8.4		4.2	37.2	24.6
1AO6.A	ASP	259	83.8	47.44	-1.08	3.87			38.8	62.9	24.1	-1
1AO6.A	LEU	260	8.3	3.66	-0.03		13.4			28.5	15.1
1AO6.A	ALA	261	1.8	1.29	0.05		0.2			11.5	11.4
1AO6.A	LYS	262	118.2	50.2	1.03	10.43			0.1	84.4	84.3	1
1AO6.A	TYR	263	59.8	22.61	0.03	13.09			0.2	48.4	48.2
1AO6.A	ILE	264	5.8	2.6	-0.04		14.5			14.9	0.4
1AO6.A	CYS	265	15.1	9.69	0.05					17.9	17.9
1AO6.A	GLU	266	126.2	60.85	-1.05	4.78			48.4	80.1	31.8	-1
1AO6.A	ASN	267	41.7	24.15	0.05				5.9	38.9	33
1AO6.A	GLN	268	33.8	16.89	0.02				1.2	42.3	41
1AO6.A	ASP	269	149.3	84.51	-1.08	3.15			38.3	84.8	46.5	-1
1AO6.A	SER	270	61	41.81	-0.01					53.9	53.9
1AO6.A	ILE	271			-0.04					2.4	2.4
1AO6.A	SER	272	0.8	0.57	-0.01					7.7	7.7
1AO6.A	SER	273	71.1	48.78	-0.01					53.2	53.2
1AO6.A	LYS	274	50.2	21.31	1.03	9.87			5	62.7	57.7	1
1AO6.A	LEU	275			-0.03
1AO6.A	LYS	276	120.5	51.19	1.03	10.29			0.3	87.1	86.8	1
1AO6.A	GLU	277	109.6	52.82	-1.05	4.5			32.6	77.1	44.6	-1
1AO6.A	CYS	278			0.05					1	1
1AO6.A	CYS	279	18.4	11.76	0.05				0.3	18.2	18
1AO6.A	GLU	280	153.2	73.84	-1.05	4.57			37.8	91.4	53.7	-1
1AO6.A	LYS	281	94	39.93	1.03	10.5		40.1		70.7	30.6	1
1AO6.A	PRO	282	97.5	56.77	-0.16			2.1		57.9	55.8
1AO6.A	LEU	283	82.8	36.49	-0.03		38.4	7.6		74.8	28.8
1AO6.A	LEU	284	15	6.6	-0.03		6.6	5.3		38	26.1
1AO6.A	GLU	285	38.6	18.62	-1.05	3.7				32.6	32.6	-1
1AO6.A	LYS	286	37.2	15.81	1.03	10.29				37	37	1
1AO6.A	SER	287	4.1	2.84	-0.01			1.4		16.1	14.7
1AO6.A	HIS	288	31.7	14.41	1.12	10.74			8	33.8	25.8
1AO6.A	CYS	289	18.8	12.07	0.05			0.4		26.2	25.8
1AO6.A	ILE	290	8.8	3.96	-0.04		6.3			17.8	11.5
1AO6.A	ALA	291	36.4	26.55	0.05			1.6	1	35.8	33.2
1AO6.A	GLU	292	85.5	41.23	-1.05	2.58		0.1	27.6	83.9	56.2	-1
1AO6.A	VAL	293	28.1	14.4	-0.06					34.7	34.7
1AO6.A	GLU	294	133.3	64.25	-1.05	4.45				78	78	-1
1AO6.A	ASN	295	47.7	27.65	0.05			9.6		49.6	40
1AO6.A	ASP	296	4.4	2.49	-1.08	1.01				8.1	8.1	-1
1AO6.A	GLU	297	130.8	63.06	-1.05	4.19				70.8	70.8	-1
1AO6.A	MET	298	76.6	31.33	0		30.5			70.5	40
1AO6.A	PRO	299	32.3	18.81	-0.16				4.2	31.6	27.3
1AO6.A	ALA	300	129.8	94.57	0.05				11.2	66.2	55.1
1AO6.A	ASP	301	142.3	80.58	-1.08	3.87			57.6	88.5	30.8	-1
1AO6.A	LEU	302	43	18.96	-0.03		4.4		11.9	49.2	32.8
1AO6.A	PRO	303	95.5	55.62	-0.16				1.7	66.8	65.1
1AO6.A	SER	304	87.1	59.71	-0.01					52	52
1AO6.A	LEU	305	13.2	5.8	-0.03		6.7			18.1	11.5
1AO6.A	ALA	306	27.6	20.08	0.05		8.7		0.2	30.8	21.9
1AO6.A	ALA	307	48.5	35.32	0.05				3.4	38.1	34.7
1AO6.A	ASP	308	76.7	43.43	-1.08	3.65	1.1		32.2	60	26.7	-1
1AO6.A	PHE	309	3.8	1.43	0.03		13.7			17.1	3.4
1AO6.A	VAL	310	11.1	5.68	-0.06		6.6			20	13.5
1AO6.A	GLU	311	126.4	60.93	-1.05	4.5			40.2	79.3	39.2	-1
1AO6.A	SER	312	39	26.76	-0.01					37.3	37.3
1AO6.A	LYS	313	165.3	70.21	1.03	10.5		46.7		108.4	61.8	1
1AO6.A	ASP	314	75.8	42.9	-1.08	4				58.4	58.4	-1
1AO6.A	VAL	315			-0.06					4.2	4.2
1AO6.A	CYS	316	13.6	8.71	0.05					21.8	21.8
1AO6.A	LYS	317	154.9	65.78	1.03	10.36				102.5	102.5	1
1AO6.A	ASN	318	82.1	47.53	0.05					53	53
1AO6.A	TYR	319	10	3.8	0.03				1.4	16.1	14.7
1AO6.A	ALA	320	75.9	55.3	0.05					51.7	51.7
1AO6.A	GLU	321	130.9	63.13	-1.05	3.94				84.6	84.6	-1
1AO6.A	ALA	322	51.8	37.7	0.05		8.3			40.9	32.6
1AO6.A	LYS	323	96	40.78	1.03	10.5				74.8	74.8	1
1AO6.A	ASP	324	73.1	41.35	-1.08	3.68				59.9	59.9	-1
1AO6.A	VAL	325	89	45.53	-0.06		43.7			64.8	21.1
1AO6.A	PHE	326	5.8	2.22	0.03		7			28.4	21.4
1AO6.A	LEU	327	8.7	3.82	-0.03					20.2	20.2
1AO6.A	GLY	328	9.3	9.23	0.06					16.8	16.8
1AO6.A	MET	329	70.8	28.95	0		50.5			52	1.5
1AO6.A	PHE	330			0.03
1AO6.A	LEU	331	4.1	1.82	-0.03		7.9			9.8	1.9
1AO6.A	TYR	332	13	4.92	0	8.97	2.1			17.5	15.3
1AO6.A	GLU	333	27.9	13.44	-1.05	1.62	0.6			25.1	24.5	-1
1AO6.A	TYR	334	10.1	3.81	0.03	11.13	1.4			12.4	11
1AO6.A	ALA	335			0.05
1AO6.A	ARG	336	15.1	5.58	1.04					15.9	15.9	1
1AO6.A	ARG	337	33.3	12.33	1.04	10.96	2.5		8	51.4	40.9	1
1AO6.A	HIS	338	51.8	23.54	0.65	7.44	3.6		5.8	36.3	26.8
1AO6.A	PRO	339	35.7	20.77	-0.16		10.6		0.8	45.4	33.9
1AO6.A	ASP	340	46	26.01	-1.08				25.6	44.7	19.1	-1
1AO6.A	TYR	341	18.4	6.98	0.03	13.5			6.2	25.2	18.9
1AO6.A	SER	342			-0.01
1AO6.A	VAL	343	1.7	0.89	-0.06		0.6			6.8	6.2
1AO6.A	VAL	344	5.8	2.96	-0.06		7.7			16.8	9.1
1AO6.A	LEU	345			-0.03
1AO6.A	LEU	346			-0.03
1AO6.A	LEU	347	4.3	1.9	-0.03		14.8			20.8	6
1AO6.A	ARG	348	7.2	2.68	1.04	11.38				25.3	25.3	1
1AO6.A	LEU	349			-0.03
1AO6.A	ALA	350	5.2	3.81	0.05		3.6			14.5	10.9
1AO6.A	LYS	351	97.6	41.43	1.03	10.15	16.1	30.5		88.8	42.2	1
1AO6.A	THR	352	28.3	16.22	0				0.6	30.2	29.6
1AO6.A	TYR	353			0.03	11.33
1AO6.A	GLU	354	13.6	6.57	-1.05	3.87				21.3	21.3	-1
1AO6.A	THR	355	70.7	40.56	0			1.7		50.3	48.7
1AO6.A	THR	356	6.6	3.76	0				0.8	25.1	24.3
1AO6.A	LEU	357			-0.03
1AO6.A	GLU	358	94.4	45.5	-1.05	3.84			38.7	73.5	34.8	-1
1AO6.A	LYS	359	158.7	67.42	1.03	10.5		44		104.6	60.6	1
1AO6.A	CYS	360	1.2	0.77	0.05					1.5	1.5
1AO6.A	CYS	361	28.1	17.98	0.05					28.5	28.5
1AO6.A	ALA	362	96.8	70.48	0.05				9.2	60.7	51.5
1AO6.A	ALA	363	53.2	38.74	0.05				6.5	42.1	35.6
1AO6.A	ALA	364	119.7	87.22	0.05				12.6	66.1	53.5
1AO6.A	ASP	365	101.6	57.51	-1.08	3.94			41.4	68.3	26.9	-1
1AO6.A	PRO	366	24.8	14.44	-0.16				1.7	32	30.3
1AO6.A	HIS	367	79.2	36.02	0.18	6.65				69	69
1AO6.A	GLU	368	154.8	74.61	-1.05	4.5			47.4	97.9	50.5	-1
1AO6.A	CYS	369	41	26.29	0.05					42.6	42.6
1AO6.A	TYR	370	0.9	0.32	0	8.87				6.2	6.2
1AO6.A	ALA	371	61.7	44.96	0.05					46.4	46.4
1AO6.A	LYS	372	137.6	58.46	1.03	10.5		37.3		92.8	55.4	1
1AO6.A	VAL	373			-0.06
1AO6.A	PHE	374	61	23.29	0.03		23.6			53.9	30.3
1AO6.A	ASP	375	84.9	48.05	-1.08	3.87			39.3	64.8	25.5	-1
1AO6.A	GLU	376	85.7	41.3	-1.05	4.5			37.1	67.5	30.3	-1
1AO6.A	PHE	377	1.3	0.49	0.03					9.3	9.3
1AO6.A	LYS	378	129.5	55.01	1.03	10.5		35.5		90.4	54.9	1
1AO6.A	PRO	379	91.7	53.38	-0.16				0.5	65.5	65.1
1AO6.A	LEU	380	50.2	22.12	-0.03					45.3	45.3
1AO6.A	VAL	381	15.2	7.8	-0.06					23.3	23.3
1AO6.A	GLU	382	86.6	41.76	-1.05	4.5			40.5	68.6	28.1	-1
1AO6.A	GLU	383	75	36.17	-1.05	1.06				63.2	63.2	-1
1AO6.A	PRO	384			-0.16					0.8	0.8
1AO6.A	GLN	385	71.4	35.73	0.02					58.8	58.8
1AO6.A	ASN	386	74.3	43.05	0.05			5	10.5	58.5	43.1
1AO6.A	LEU	387	22.2	9.77	-0.03		1.6	3		36.1	31.5
1AO6.A	ILE	388	1.7	0.78	-0.04		7			21.5	14.5
1AO6.A	LYS	389	119.9	50.92	1.03	10.5		42.3		85.9	43.7	1
1AO6.A	GLN	390	109.9	54.99	0.02			10.3		77.7	67.4
1AO6.A	ASN	391	5.5	3.18	0.05		1.3			27.3	26
1AO6.A	CYS	392	2.9	1.86	0.05		2.4			13.6	11.2
1AO6.A	GLU	393	104.1	50.19	-1.05	4.44			35.1	72.8	37.7	-1
1AO6.A	LEU	394	52.3	23.05	-0.03					51.2	51.2
1AO6.A	PHE	395	28.8	11	0.03					26.3	26.3
1AO6.A	GLU	396	127.4	61.43	-1.05	4.5			53.8	91.5	37.7	-1
1AO6.A	GLN	397	130.6	65.37	0.02				10.7	84.3	73.6
1AO6.A	LEU	398	19	8.39	-0.03			6		32.9	26.9
1AO6.A	GLY	399	31.6	31.48	0.06					22.3	22.3
1AO6.A	GLU	400	73.4	35.39	-1.05	4.11				51.5	51.5	-1
1AO6.A	TYR	401	46	17.4	0.03	10.52				62.2	62.2
1AO6.A	LYS	402	101.9	43.25	1.03	10.43		46.4		80.5	34.1	1
1AO6.A	PHE	403			0.03		1.5			2	0.5
1AO6.A	GLN	404	2.1	1.07	0.02			1.9		10.7	8.8
1AO6.A	ASN	405	3.6	2.06	0.05					23.1	23.1
1AO6.A	ALA	406	24.7	18.02	0.05					30.7	30.7
1AO6.A	LEU	407	2.6	1.15	-0.03		8.8			15.8	7
1AO6.A	LEU	408			-0.03
1AO6.A	VAL	409	24.4	12.49	-0.06					31.3	31.3
1AO6.A	ARG	410	67.2	24.87	1.04	12.46		32.6		80.4	47.8	1
1AO6.A	TYR	411	7.5	2.85	0.03	10.54	1.5			25.1	23.6
1AO6.A	THR	412			0
1AO6.A	LYS	413	38.7	16.41	1.03	10.01				40.7	40.7	1
1AO6.A	LYS	414	7.8	3.33	0.68	7.66		8		19.3	11.4	1
1AO6.A	VAL	415			-0.06					2.3	2.3
1AO6.A	PRO	416	2	1.16	-0.16					7.1	7.1
1AO6.A	GLN	417	56.1	28.06	0.02					52.7	52.7
1AO6.A	VAL	418	1.9	0.96	-0.06					10	10
1AO6.A	SER	419	52.8	36.22	-0.01					52.5	52.5
1AO6.A	THR	420	7.9	4.53	0					20.3	20.3
1AO6.A	PRO	421	110.7	64.47	-0.16					67.6	67.6
1AO6.A	THR	422	6.4	3.68	0					19.3	19.3
1AO6.A	LEU	423			-0.03					5.4	5.4
1AO6.A	VAL	424	2.2	1.11	-0.06					12.6	12.6
1AO6.A	GLU	425	63.3	30.51	-1.05	4.73		0.1	28.7	62.1	33.3	-1
1AO6.A	VAL	426	1.5	0.75	-0.06					7.9	7.9
1AO6.A	SER	427			-0.01					6	6
1AO6.A	ARG	428	25	9.26	1.04	11.3		27.5		41.6	14.1	1
1AO6.A	ASN	429	13.5	7.8	0.05			8.4		31.8	23.4
1AO6.A	LEU	430	1.8	0.79	-0.03		17.1			19.1	2.1
1AO6.A	GLY	431			0.06
1AO6.A	LYS	432	45.7	19.42	1.03	9.92		39.1		67.4	28.3	1
1AO6.A	VAL	433	3.9	2	-0.06		15.6			20.7	5.1
1AO6.A	GLY	434			0.06		1			3.1	2.2
1AO6.A	SER	435	44.5	30.5	-0.01					37.2	37.2
1AO6.A	LYS	436	91.8	38.99	1.03	9.67	8.9	44.9		94.5	40.8	1
1AO6.A	CYS	437			0.05		1.8			3.2	1.4
1AO6.A	CYS	438	6.5	4.17	0.05		0.5		2	14.8	12.3
1AO6.A	LYS	439	187.3	79.55	1.03	10.5		47.3		119.2	71.9	1
1AO6.A	HIS	440	54.7	24.87	0.26	6.89	2.4	4.2		44	37.5
1AO6.A	PRO	441	95.1	55.36	-0.16					54.9	54.9
1AO6.A	GLU	442	164.1	79.13	-1.05	4.5			51.1	106.7	55.6	-1
1AO6.A	ALA	443	56.6	41.2	0.05				2.1	45.1	43
1AO6.A	LYS	444	107	45.42	1.03	10.36		37.7		70.6	32.8	1
1AO6.A	ARG	445	31.7	11.74	1.04	11.94				50.9	50.9	1
1AO6.A	MET	446	3.9	1.61	0					17	17
1AO6.A	PRO	447	19.5	11.36	-0.16					28.1	28.1
1AO6.A	CYS	448	33.8	21.66	0.05		9.5			32	22.5
1AO6.A	ALA	449			0.05		4.2			4.2
1AO6.A	GLU	450			-1.05							-1
1AO6.A	ASP	451	24.1	13.65	-1.06	5.55				32.5	32.5	-1
1AO6.A	TYR	452	27.3	10.32	0.03	11.46	16.9	7.3		47.7	23.5
1AO6.A	LEU	453	10.2	4.51	-0.03		25.2			25.4	0.2
1AO6.A	SER	454	0.8	0.57	-0.01					14.8	14.8
1AO6.A	VAL	455	6.5	3.32	-0.06		16.1			24.7	8.6
1AO6.A	VAL	456	2.6	1.32	-0.06		2			10.6	8.6
1AO6.A	LEU	457	0.9	0.38	-0.03		5.1			6.4	1.3
1AO6.A	ASN	458			0.05					5.8	5.8
1AO6.A	GLN	459	18.1	9.07	0.02			1.4	0.2	43.2	41.6
1AO6.A	LEU	460			-0.03					6.9	6.9
1AO6.A	CYS	461	2.8	1.81	0.05					14.8	14.8
1AO6.A	VAL	462	2.7	1.39	-0.06				3.6	24.4	20.8
1AO6.A	LEU	463	12.4	5.47	-0.03				2.4	35.4	32.9
1AO6.A	HIS	464	4.7	2.13	0.03	3.99				19.7	19.7
1AO6.A	GLU	465	79.1	38.12	-1.05	4.64			15.8	74.3	58.5	-1
1AO6.A	LYS	466	90.5	38.41	1.03	9.8				97.4	97.4	1
1AO6.A	THR	467	94.1	53.94	0					67.2	67.2
1AO6.A	PRO	468	99.2	57.77	-0.16					66.3	66.3
1AO6.A	VAL	469	78.2	40	-0.06					65	65
1AO6.A	SER	470	2.8	1.94	-0.01					9.8	9.8
1AO6.A	ASP	471	126.2	71.43	-1.08	3.82			39.8	77.1	37.3	-1
1AO6.A	ARG	472	50.4	18.66	1.04	11.38		18.9		53	34.1	1
1AO6.A	VAL	473			-0.06					0.6	0.6
1AO6.A	THR	474	56.4	32.34	0					50.9	50.9
1AO6.A	LYS	475	112.7	47.87	1.03	10.5		37.2	0.3	87.2	49.7	1
1AO6.A	CYS	476			0.05					4.2	4.2
1AO6.A	CYS	477	7	4.46	0.05					11.4	11.4
1AO6.A	THR	478	99.1	56.82	0					68.7	68.7
1AO6.A	GLU	479	127.8	61.6	-1.05	4.5			40.4	85.3	44.9	-1
1AO6.A	SER	480	33.2	22.79	-0.01					35.3	35.3
1AO6.A	LEU	481	8.2	3.63	-0.03		19.2			42.3	23.1
1AO6.A	VAL	482	18	9.21	-0.06		16.1			32.5	16.4
1AO6.A	ASN	483	55.2	31.95	0.05					47.6	47.6
1AO6.A	ARG	484	4	1.48	1.03	10.09				17.9	17.9	1
1AO6.A	ARG	485	2.3	0.87	1.04		3			7.9	4.9	1
1AO6.A	PRO	486	21.1	12.31	-0.16					28.9	28.9
1AO6.A	CYS	487	21.5	13.78	0.05					31.9	31.9
1AO6.A	PHE	488			0.03
1AO6.A	SER	489	21.5	14.74	-0.01			3.6	5.1	32.1	23.4
1AO6.A	ALA	490	97.5	70.99	0.05				9.7	56.2	46.5
1AO6.A	LEU	491	12.6	5.56	-0.03			6.5	0.2	21.3	14.6
1AO6.A	GLU	492	127.4	61.43	-1.05	4.41		2	39.4	85.1	43.7	-1
1AO6.A	VAL	493	46.6	23.83	-0.06				9.8	65	55.2
1AO6.A	ASP	494	8.4	4.75	-1.08	1.99				22.3	22.3	-1
1AO6.A	GLU	495	152.7	73.6	-1.05	4.5			54.3	101.2	46.9	-1
1AO6.A	THR	496	125.3	71.85	0				3.4	76	72.6
1AO6.A	TYR	497	33.6	12.73	0.02	9.57			8.7	49.7	41
1AO6.A	VAL	498	141.7	72.54	-0.06					81.6	81.6
1AO6.A	PRO	499	53.7	31.3	-0.16					48.2	48.2
1AO6.A	LYS	500	157.6	66.93	1.03	10.5		50.5		102.2	51.7	1
1AO6.A	GLU	501	144	69.42	-1.05	4.5			51.9	99	47.2	-1
1AO6.A	PHE	502	49.9	19.05	0.03				1.2	63	61.8
1AO6.A	ASN	503	57.3	33.2	0.05			12.5		51.4	38.9
1AO6.A	ALA	504	59.7	43.47	0.05			6.4		51.1	44.7
1AO6.A	GLU	505	157.8	76.09	-1.05	4.5		3.4	52.3	97.9	42.1	-1
1AO6.A	THR	506	71.4	40.95	0					66	66
1AO6.A	PHE	507			0.03					4.7	4.7
1AO6.A	THR	508	61.2	35.06	0				15	62.1	47.1
1AO6.A	PHE	509	8.3	3.16	0.03					17.3	17.3
1AO6.A	HIS	510	103.8	47.19	0.14	6.5			13.7	94.3	80.6
1AO6.A	ALA	511	23.5	17.09	0.05					38.3	38.3
1AO6.A	ASP	512	86.9	49.22	-1.08	3.59			37.9	74.2	36.2	-1
1AO6.A	ILE	513	2.3	1.05	-0.04					7.8	7.8
1AO6.A	CYS	514	37.7	24.17	0.05					38.3	38.3
1AO6.A	THR	515	126	72.24	0					77	77
1AO6.A	LEU	516	52.4	23.07	-0.03			1	0	55.4	54.3
1AO6.A	SER	517	53.5	36.71	-0.01					41.7	41.7
1AO6.A	GLU	518	84.8	40.87	-1.05	4.05			12.9	58.2	45.4	-1
1AO6.A	LYS	519	111.6	47.38	1.03	10.43		54.9		110.9	55.9	1
1AO6.A	GLU	520	28.5	13.72	-1.05	2.43				38.4	38.4	-1
1AO6.A	ARG	521	28.9	10.7	1.04	11.45			0.6	35	34.4	1
1AO6.A	GLN	522	40.1	20.07	0.02					34.2	34.2
1AO6.A	ILE	523	63.6	28.62	-0.04					55.7	55.7
1AO6.A	LYS	524	84.7	35.98	1.03	10.43		46.3		77.7	31.4	1
1AO6.A	LYS	525	10.7	4.56	1.03	10.06			0.2	19.8	19.6	1
1AO6.A	GLN	526			0.02
1AO6.A	THR	527	36	20.64	0					37.8	37.8
1AO6.A	ALA	528	1.8	1.29	0.05					7.1	7.1
1AO6.A	LEU	529			-0.03					9.6	9.6
1AO6.A	VAL	530			-0.06
1AO6.A	GLU	531	31.7	15.28	-1.05	1.4				31.2	31.2	-1
1AO6.A	LEU	532	5.7	2.51	-0.03					13.5	13.5
1AO6.A	VAL	533			-0.06
1AO6.A	LYS	534	20.3	8.63	1.03	11.11				27	27	1
1AO6.A	HIS	535	24.3	11.03	0.04	5.57			0.8	46.9	46.1
1AO6.A	LYS	536	35.1	14.91	1.03	10.08				51.7	51.7	1
1AO6.A	PRO	537	6.6	3.85	-0.16					27.2	27.2
1AO6.A	LYS	538	195.1	82.87	1.03	10.5		44.7	0.2	130.6	85.7	1
1AO6.A	ALA	539	66.2	48.22	0.05					40.3	40.3
1AO6.A	THR	540	14.4	8.27	0					19.7	19.7
1AO6.A	LYS	541	172.8	73.4	1.03	10.5		71.3		120.1	48.8	1
1AO6.A	GLU	542	148.6	71.62	-1.05	4.5		2.5	39.2	91.5	49.8	-1
1AO6.A	GLN	543	61	30.54	0.02					57.4	57.4
1AO6.A	LEU	544	1.3	0.56	-0.03					12.1	12.1
1AO6.A	LYS	545	82.3	34.94	1.03	10.36		37.7	2.5	108.9	68.6	1
1AO6.A	ALA	546	54.2	39.48	0.05				2.5	44.5	42.1
1AO6.A	VAL	547	16.9	8.66	-0.06					29.9	29.9
1AO6.A	MET	548	2	0.82	0				0.3	12	11.7
1AO6.A	ASP	549	80.6	45.61	-1.08	3.94			33.6	61	27.5	-1
1AO6.A	ASP	550	52.8	29.91	-1.08	3.94				46.8	46.8	-1
1AO6.A	PHE	551			0.03
1AO6.A	ALA	552	22.6	16.43	0.05					24.2	24.2
1AO6.A	ALA	553	45	32.76	0.05			1.6		36	34.4
1AO6.A	PHE	554	0.4	0.14	0.03					6.7	6.7
1AO6.A	VAL	555	0.4	0.2	-0.06					4.3	4.3
1AO6.A	GLU	556	89.5	43.14	-1.05	4.5			32.4	71.1	38.7	-1
1AO6.A	LYS	557	125.5	53.31	1.03	10.43		38.4		88.4	49.9	1
1AO6.A	CYS	558			0.05					1.7	1.7
1AO6.A	CYS	559	36.7	23.51	0.05					33.5	33.5
1AO6.A	LYS	560	168.8	71.7	1.03	10.5		39.2	9.6	106.9	58.2	1
1AO6.A	ALA	561	52.6	38.3	0.05				8.9	38.9	29.9
1AO6.A	ASP	562	146.8	83.1	-1.08	3.9			47.4	80.2	32.8	-1
1AO6.A	ASP	563	38.2	21.65	-1.08	2.32				36.3	36.3	-1
1AO6.A	LYS	564	190.1	80.75	1.03	10.5		39.5	4.9	109.6	65.2	1
1AO6.A	GLU	565	118.1	56.93	-1.05	4.5			55.5	100.6	45.1	-1
1AO6.A	THR	566	73.5	42.15	0					54.1	54.1
1AO6.A	CYS	567	20.1	12.89	0.05				0.1	24.1	24
1AO6.A	PHE	568	0.9	0.33	0.03					5.2	5.2
1AO6.A	ALA	569	35.7	25.99	0.05				0	43.5	43.4
1AO6.A	GLU	570	100.7	48.55	-1.05	4.5			35.4	73.5	38.1	-1
1AO6.A	GLU	571	58.3	28.09	-1.05	4.5			30	36.5	6.5	-1
1AO6.A	GLY	572			0.06
1AO6.A	LYS	573	128	54.34	1.03	10.5		49.1	0.1	99.8	50.5	1
1AO6.A	LYS	574	166.7	70.8	1.03	10.5		47.7	0.4	101.1	53.1	1
1AO6.A	LEU	575	33.8	14.91	-0.03				1.4	39.9	38.5
1AO6.A	VAL	576	12.5	6.39	-0.06			0.1		21.4	21.4
1AO6.A	ALA	577	62.3	45.4	0.05					44.6	44.6
1AO6.A	ALA	578	64.7	47.11	0.05					50.5	50.5
1AO6.A	SER	579	4.3	2.97	-0.01					20.3	20.3
1AO6.A	GLN	580	103.9	52	0.02				28	86.5	58.5
1AO6.A	ALA	581	96.2	70.09	0.05				10.7	55.7	45
1AO6.A	ALA	582	54.2	39.51	0				8.3	47.9	39.6
