# Supplementary material for: Methacrylate Coatings for Titanium Surfaces to Optimize Biocompatibility
Source: Micromachines (Basel). 2020 Jan 13;11(1):87. doi: 10.3390/mi11010087 (PMC7019220; doi:10.3390/mi11010087)
Supplement: Supplementary file 1 [file micromachines-11-00087-s001.zip › S2.csv]

Chain	Res	UID	res_ASA	res_exp	res_charge	propKa	res_hyd	res_pos	res_neg	res_tot	res_oth	ens_res_charge	ens_sc_pKa	ens_bb_pKa
1NCX.A	ALA	1	118.2	86.09	1.01	7.93			1.7	59.7	58	1
1NCX.A	SER	2	76.5	52.48	-0.02				0.3	41.9	41.7
1NCX.A	MET	3	55.8	22.82	-0.02				1.2	46.4	45.2
1NCX.A	THR	4	105.7	60.59	-0.02				1.8	49.3	47.5
1NCX.A	ASP	5	74.7	42.29	-1.1	2.84			30.9	44.5	13.7	-1
1NCX.A	GLN	6	45.5	22.76	0				0.1	18.7	18.6
1NCX.A	GLN	7	21.2	10.63	0				10.9	21	10.1
1NCX.A	ALA	8	66.8	48.67	0.03				1.2	34.5	33.3
1NCX.A	GLU	9	105.4	50.81	-1.07	4.57			38.9	59.5	20.6	-1
1NCX.A	ALA	10	2.3	1.7	0.03
1NCX.A	ARG	11	87.8	32.52	1.01	12.01				43.7	43.7	1
1NCX.A	ALA	12	107	77.97	0.03					46.3	46.3
1NCX.A	PHE	13	112.9	43.07	0.01		40.8			77.3	36.5
1NCX.A	LEU	14	14	6.17	-0.04		4.6			17.8	13.2
1NCX.A	SER	15	54.7	37.51	-0.02					28.6	28.6
1NCX.A	GLU	16	116.1	55.98	-1.07	4.48				55.9	55.9	-1
1NCX.A	GLU	17	136.9	65.99	-1.07	3.29				58.3	58.3	-1
1NCX.A	MET	18	77.8	31.79	-0.02		6.6			42.9	36.2
1NCX.A	ILE	19	3.9	1.77	-0.05					7.1	7.1
1NCX.A	ALA	20	59.6	43.43	0.03					42.7	42.7
1NCX.A	GLU	21	100.2	48.31	-1.07	4.5				58.7	58.7	-1
1NCX.A	PHE	22	8.9	3.39	0.01		2.1			3.4	1.2
1NCX.A	LYS	23	71.5	30.37	1.01	10.29				47.8	47.8	1
1NCX.A	ALA	24	76.9	56.03	0.03					38.8	38.8
1NCX.A	ALA	25	17.2	12.5	0.03		3.2			18.9	15.8
1NCX.A	PHE	26			0.01
1NCX.A	ASP	27	56	31.71	-1.1	3.42				18.7	18.7	-1
1NCX.A	MET	28	142.8	58.38	-0.02		45.5			80.5	35
1NCX.A	PHE	29	51.4	19.62	0.01		20.1		0.4	42.4	21.9
1NCX.A	ASP	30	9.9	5.61	-1.1	1.94				3.9	3.9	-1
1NCX.A	ALA	31	114.3	83.23	0.03					59.7	59.7
1NCX.A	ASP	32	132.9	75.26	-1.1	3.8			54.3	78.8	24.5	-1
1NCX.A	GLY	33	75.6	75.38	0.04				8	28.4	20.4
1NCX.A	GLY	34	54.9	54.76	0.04				5.6	17.9	12.4
1NCX.A	GLY	35	26.2	26.07	0.04					11.9	11.9
1NCX.A	ASP	36	40.2	22.77	-1.1	4.28			8.9	8.9		-1
1NCX.A	ILE	37	3.3	1.48	-0.05
1NCX.A	SER	38	41.1	28.18	-0.02					18.8	18.8
1NCX.A	THR	39	3	1.75	-0.02					1.4	1.4
1NCX.A	LYS	40	184.3	78.26	1.01	10.5		40.4	1.5	77.1	35.2	1
1NCX.A	GLU	41	57.4	27.65	-1.07	4.55			23.9	30.9	7	-1
1NCX.A	LEU	42			-0.04
1NCX.A	GLY	43	6.3	6.24	0.04
1NCX.A	THR	44	58.5	33.54	-0.02		3.5		1.5	27.5	22.6
1NCX.A	VAL	45			-0.07
1NCX.A	MET	46			-0.02
1NCX.A	ARG	47	109.6	40.6	1.01	12.01		10.2	0.9	43.9	32.8	1
1NCX.A	MET	48	96.6	39.48	-0.02		25.9			66.5	40.6
1NCX.A	LEU	49	25.6	11.28	-0.04		3.2			21.6	18.4
1NCX.A	GLY	50	61.8	61.59	0.04					35.2	35.2
1NCX.A	GLN	51	11.4	5.72	0					0.8	0.8
1NCX.A	ASN	52	98.9	57.29	0.04					43.4	43.4
1NCX.A	PRO	53	6.4	3.72	-0.18
1NCX.A	THR	54	89.2	51.14	-0.02			1.2	4.9	43.1	37.1
1NCX.A	LYS	55	159.6	67.79	1.01	10.36		38.5	1.8	83.3	43	1
1NCX.A	GLU	56	140.7	67.83	-1.07	4.64		1.7	18.9	62.1	41.5	-1
1NCX.A	GLU	57	35.4	17.08	-1.07	2.73			8.1	8.6	0.5	-1
1NCX.A	LEU	58	13.2	5.82	-0.04
1NCX.A	ASP	59	74.8	42.36	-1.1	3.87			18	18		-1
1NCX.A	ALA	60	51.8	37.7	0.03				6.7	23	16.4
1NCX.A	ILE	61	11.3	5.09	-0.05
1NCX.A	ILE	62	37.4	16.83	-0.05				1.4	9.4	8
1NCX.A	GLU	63	112.9	54.44	-1.07	4.78			41.9	66	24.1	-1
1NCX.A	GLU	64	71	34.21	-1.07	3.54			16.4	47.2	30.8	-1
1NCX.A	VAL	65	18	9.19	-0.07				13.7	17.3	3.5
1NCX.A	ASP	66	22.6	12.78	-1.1	2.63			12.2	14.8	2.6	-1
1NCX.A	GLU	67	165	79.56	-1.07	4.64			59	78.3	19.4	-1
1NCX.A	ASP	68	133.8	75.72	-1.1	2.66			40.3	74.6	34.3	-1
1NCX.A	GLY	69	70.4	70.17	0.04				13.8	27.9	14.1
1NCX.A	SER	70	70.2	48.17	-0.02				6.6	27.5	20.9
1NCX.A	GLY	71	31	30.93	0.04				1.1	13.2	12.2
1NCX.A	THR	72	42.8	24.53	-0.02				1.7	8	6.3
1NCX.A	ILE	73			-0.05
1NCX.A	ASP	74	54.5	30.86	-1.1	3.36			15.5	19.6	4.1	-1
1NCX.A	PHE	75	9.7	3.71	0.01					10.4	10.4
1NCX.A	GLU	76	54	26.03	-1.07	3.91			7.5	29	21.5	-1
1NCX.A	GLU	77	32.7	15.76	-1.07	3.91			18.2	18.4	0.2	-1
1NCX.A	PHE	78			0.01
1NCX.A	LEU	79			-0.04
1NCX.A	VAL	80	5.4	2.75	-0.07
1NCX.A	MET	81			-0.02
1NCX.A	MET	82			-0.02
1NCX.A	VAL	83	5	2.55	-0.07
1NCX.A	ARG	84	87.4	32.37	1.01	11.94			0.5	36.3	35.8	1
1NCX.A	GLN	85	2	1	0
1NCX.A	MET	86	27.3	11.15	-0.02		6.3			17.1	10.8
1NCX.A	LYS	87	112.9	47.93	1.01	10.43	0.8			53	52.2	1
1NCX.A	GLU	88	79.9	38.54	-1.06	5.54			29.4	42.8	13.4	-1
1NCX.A	ASP	89	30.9	17.47	-1.1	2.39				8.6	8.6	-1
1NCX.A	ALA	90	67.7	49.31	0.03					36.3	36.3
1NCX.A	LYS	91	123.2	52.31	1.01	10.43			1.2	73.8	72.7	1
1NCX.A	GLY	92	30.8	30.68	0.04				1.1	13.1	12
1NCX.A	LYS	93	139.1	59.08	1.01	10.5		41.4		91.8	50.4	1
1NCX.A	SER	94	45.1	30.92	-0.02				0.6	30.4	29.8
1NCX.A	GLU	95	82.3	39.69	-1.07	4.41	1.4		28.8	57.2	27	-1
1NCX.A	GLU	96	112.1	54.07	-1.07	4.5			40.4	68.1	27.7	-1
1NCX.A	GLU	97	89.7	43.25	-1.07	4.35			21.5	54.8	33.4	-1
1NCX.A	LEU	98	21.4	9.43	-0.04		13.8		1	29.8	15.1
1NCX.A	ALA	99	25.2	18.38	0.03		2.6			18.2	15.6
1NCX.A	ASN	100	58.4	33.82	0.04				5.6	42.3	36.7
1NCX.A	CYS	101	37.1	23.8	0.04	9.07	0.6			18.6	18
1NCX.A	PHE	102	9.7	3.7	0.01		0.2			6.2	6
1NCX.A	ARG	103	171.9	63.65	1.01	12.29		45		87.3	42.3	1
1NCX.A	ILE	104	141.1	63.48	-0.05					77.8	77.8
1NCX.A	PHE	105	12.6	4.79	0.01		13.2			16.9	3.6
1NCX.A	ASP	106	2.6	1.49	-1.1	2.12				2.4	2.4	-1
1NCX.A	LYS	107	101.7	43.19	1.01	9.59			0.6	59.1	58.5	1
1NCX.A	ASN	108	98.3	56.92	0.04				0.3	41.7	41.3
1NCX.A	ALA	109	91	66.29	0.03					29.8	29.8
1NCX.A	ASP	110	77.7	43.97	-1.1	3.26				34.2	34.2	-1
1NCX.A	GLY	111	36.3	36.15	0.04					21.4	21.4
1NCX.A	PHE	112	68.9	26.3	0.01					34.5	34.5
1NCX.A	ILE	113			-0.05
1NCX.A	ASP	114	35.3	19.97	-1.1	2.83			10.1	17.1	7	-1
1NCX.A	ILE	115	60.6	27.28	-0.05				7.2	37.5	30.4
1NCX.A	GLU	116	129.4	62.4	-1.07	3.95			34	66.5	32.4	-1
1NCX.A	GLU	117	10.2	4.93	-1.07	3.53				5.6	5.6	-1
1NCX.A	LEU	118			-0.04
1NCX.A	GLY	119			0.04
1NCX.A	GLU	120	100.7	48.57	-1.07	4.57			29.2	48.4	19.1	-1
1NCX.A	ILE	121	39.9	17.95	-0.05		2.6			17.4	14.8
1NCX.A	LEU	122	28.4	12.5	-0.04		30.5			34.8	4.2
1NCX.A	ARG	123	119.2	44.14	1.01	12.22				55.7	55.7	1
1NCX.A	ALA	124	94	68.47	0.03					33.6	33.6
1NCX.A	THR	125	97.7	56.01	-0.02		3.9			56.3	52.4
1NCX.A	GLY	126	58.2	58	0.04					27.1	27.1
1NCX.A	GLU	127	130.3	62.84	-1.07	4.42	0.2		32.5	55.9	23.2	-1
1NCX.A	HIS	128	185.9	84.52	0.12	6.5			8.5	101	92.5
1NCX.A	VAL	129	30.8	15.74	-0.07		12.3		0.8	29.9	16.8
1NCX.A	THR	130	84	48.15	-0.02					38.9	38.9
1NCX.A	GLU	131	80	38.55	-1.07	3.95			18.2	55.3	37	-1
1NCX.A	GLU	132	125.8	60.67	-1.07	4.5			55.9	71.8	15.9	-1
1NCX.A	ASP	133	60.8	34.39	-1.1	2.59			25.1	39	13.9	-1
1NCX.A	ILE	134			-0.05					0.4	0.4
1NCX.A	GLU	135	74.6	35.95	-1.07	4.64			30.4	38.1	7.7	-1
1NCX.A	ASP	136	65.4	37.01	-1.1	4.01			43.4	46.6	3.2	-1
1NCX.A	LEU	137	63.8	28.1	-0.04		29.9		0.5	51.7	21.3
1NCX.A	MET	138	6.7	2.72	-0.02
1NCX.A	LYS	139	133.9	56.88	1.01	10.5			0.1	69.6	69.4	1
1NCX.A	ASP	140	101.1	57.25	-1.1	3.94			23.4	43.4	19.9	-1
1NCX.A	SER	141	4	2.76	-0.02					0.9	0.9
1NCX.A	ASP	142	6.2	3.53	-1.1	3.32			1.2	1.8	0.7	-1
1NCX.A	LYS	143	119	50.54	1.01	10.36		37.1		86.5	49.4	1
1NCX.A	ASN	144	102	59.06	0.04					51	51
1NCX.A	ASN	145	141.1	81.75	0.04				11.3	67.4	56.1
1NCX.A	ASP	146	47.1	26.66	-1.1	1.89				33.3	33.3	-1
1NCX.A	GLY	147	41.9	41.81	0.04					19.8	19.8
1NCX.A	ARG	148	98.9	36.64	1.01	11.8				55.3	55.3	1
1NCX.A	ILE	149			-0.05
1NCX.A	ASP	150	42.5	24.04	-1.1	2.86			6.8	12.7	5.9	-1
1NCX.A	PHE	151	85.2	32.52	0.01		31.4			44	12.5
1NCX.A	ASP	152	85.2	48.22	-1.1	3.94			24	40.3	16.2	-1
1NCX.A	GLU	153	3.1	1.52	-1.07	3.57						-1
1NCX.A	PHE	154			0.01
1NCX.A	LEU	155	23	10.11	-0.04		12		0.7	24.4	11.7
1NCX.A	LYS	156	58.8	24.98	1.01	10.22		11.2	6.8	48.6	30.6	1
1NCX.A	MET	157	28.5	11.65	-0.02		9.6		0.4	28.5	18.5
1NCX.A	MET	158	88	35.98	-0.02		30.7			55.1	24.3
1NCX.A	GLU	159	65.6	31.62	-1.07	4.13			21.7	57.4	35.8	-1
1NCX.A	GLY	160	53.8	53.59	0.04				12	33	21
1NCX.A	VAL	161	183.2	93.75	-0.07				12.5	95.5	82.9
1NCX.A	GLN	162	101.8	50.91	-1	4.09			32.3	73.9	41.6	-1
1NCX.A	CD	163										2
1NCX.A	CD	164										2
1NCX.A	SO4	225							20.9	21.5	0.7	-2
1NCX.A	HOH	165								22.9	22.9
1NCX.A	HOH	166								14.2	14.2
1NCX.A	HOH	167								14.3	14.3
1NCX.A	HOH	168							0.1	19.5	19.4
1NCX.A	HOH	170								11.6	11.6
1NCX.A	HOH	172							17.4	17.4
1NCX.A	HOH	173								16.6	16.6
1NCX.A	HOH	174								13.6	13.6
1NCX.A	HOH	175								14.3	14.3
1NCX.A	HOH	176							0.3	0.8	0.6
1NCX.A	HOH	177								21.2	21.2
1NCX.A	HOH	178							8.6	31.7	23.1
1NCX.A	HOH	179							11.3	21.8	10.5
1NCX.A	HOH	183							7.9	21.2	13.3
1NCX.A	HOH	184						3.6		27.9	24.3
1NCX.A	HOH	186								12.3	12.3
1NCX.A	HOH	187							0.7	21.3	20.6
1NCX.A	HOH	189								30.1	30.1
1NCX.A	HOH	190								20	20
1NCX.A	HOH	191								9.7	9.7
1NCX.A	HOH	193							15.6	28.7	13
1NCX.A	HOH	194							13.1	19.3	6.2
1NCX.A	HOH	195							8.4	18	9.6
1NCX.A	HOH	196							7.2	9.7	2.6
1NCX.A	HOH	197							4	4
1NCX.A	HOH	198							11.5	11.5
1NCX.A	HOH	199								5.9	5.9
1NCX.A	HOH	201							6.4	29.9	23.5
1NCX.A	HOH	202								16	16
1NCX.A	HOH	203								28.3	28.3
1NCX.A	HOH	204								14.6	14.6
1NCX.A	HOH	205							7	7.2	0.2
1NCX.A	HOH	206							0.2	20.8	20.6
1NCX.A	HOH	207							9	22.1	13.1
1NCX.A	HOH	208						2.4		3.5	1
1NCX.A	HOH	210							6.1	14.5	8.5
1NCX.A	HOH	211							9.5	31.8	22.3
1NCX.A	HOH	212								22.8	22.8
1NCX.A	HOH	213								8.4	8.4
1NCX.A	HOH	214								20.4	20.4
1NCX.A	HOH	216						15.2		18.3	3.1
1NCX.A	HOH	217								29.4	29.4
1NCX.A	HOH	218								23.1	23.1
1NCX.A	HOH	219							7.8	9.6	1.8
1NCX.A	HOH	220								29.1	29.1
1NCX.A	HOH	221								22.3	22.3
1NCX.A	HOH	222								22.6	22.6
1NCX.A	HOH	223								17.5	17.5
1NCX.A	HOH	224								16.8	16.8
1NCX.A	HOH	227							4.4	14.7	10.3
1NCX.A	HOH	228							5	28.2	23.2
1NCX.A	HOH	229							3.8	5.6	1.9
1NCX.A	HOH	231							14.3	33.3	18.9
1NCX.A	HOH	232								18.7	18.7
1NCX.A	HOH	233								30.6	30.6
1NCX.A	HOH	234							0.8	2.8	2
1NCX.A	HOH	235							7.2	23.7	16.6
1NCX.A	HOH	236							12.9	16.5	3.6
1NCX.A	HOH	237								33.4	33.4
1NCX.A	HOH	238								26.6	26.6
1NCX.A	HOH	239							7.3	30.4	23.1
1NCX.A	HOH	241							1.6	23.7	22.1
1NCX.A	HOH	242							4.7	18.7	14
1NCX.A	HOH	244								4.4	4.4
1NCX.A	HOH	246							5.8	21.8	16
1NCX.A	HOH	247								25.8	25.8
1NCX.A	HOH	250							10.6	13.5	2.9
1NCX.A	HOH	252							15.8	24.7	8.9
1NCX.A	HOH	255						12.3		27.2	15
1NCX.A	HOH	256							1.1	13.1	12
1NCX.A	HOH	257								14.2	14.2
1NCX.A	HOH	258								11.7	11.7
1NCX.A	HOH	259							22.1	28.2	6.1
1NCX.A	HOH	262								27.1	27.1
1NCX.A	HOH	263							0.3	22.7	22.5
1NCX.A	HOH	264							5.5	11.5	6
1NCX.A	HOH	265							11.5	27.5	16
1NCX.A	HOH	267								25.8	25.8
1NCX.A	HOH	269							9.3	20.3	11
1NCX.A	HOH	273								12.3	12.3
1NCX.A	HOH	274							0.3	15.7	15.4
1NCX.A	HOH	275								9.2	9.2
1NCX.A	HOH	279							6.6	21.5	15
1NCX.A	HOH	280								15.7	15.7
1NCX.A	HOH	281								18.9	18.9
1NCX.A	HOH	283								24.6	24.6
1NCX.A	HOH	284								14.4	14.4
1NCX.A	HOH	285								26.5	26.5
1NCX.A	HOH	286								18.1	18.1
1NCX.A	HOH	288								18	18
1NCX.A	HOH	289								15.5	15.5
1NCX.A	HOH	290							5.6	22.9	17.2
1NCX.A	HOH	291							6.8	15.8	9.1
1NCX.A	HOH	293							13.7	30.6	16.9
1NCX.A	HOH	295								33	33
1NCX.A	HOH	296								18.8	18.8
1NCX.A	HOH	298								35.1	35.1
1NCX.A	HOH	304								24.4	24.4
1NCX.A	HOH	306							3.6	17.2	13.6
1NCX.A	HOH	309								28.9	28.9
1NCX.A	HOH	310								21.6	21.6
1NCX.A	HOH	311								22.3	22.3
1NCX.A	HOH	312							25.6	32.2	6.6
1NCX.A	HOH	313							10.4	13.4	2.9
1NCX.A	HOH	316							6	16.3	10.3
1NCX.A	HOH	317								7.7	7.7
1NCX.A	HOH	318								9.4	9.4
1NCX.A	HOH	319							7.5	11.5	4
1NCX.A	HOH	321							14.5	37	22.5
1NCX.A	HOH	322								24.9	24.9
1NCX.A	HOH	323								28.5	28.5
1NCX.A	HOH	324						10.2		20.8	10.5
1NCX.A	HOH	325							1.4	11.9	10.5
1NCX.A	HOH	326								24.5	24.5
1NCX.A	HOH	327							1.1	21.5	20.4
1NCX.A	HOH	331							3.2	21.5	18.3
1NCX.A	HOH	335							4.9	17.4	12.5
1NCX.A	HOH	336							6.2	7.5	1.3
1NCX.A	HOH	337							9.3	17.6	8.4
1NCX.A	HOH	338							10.2	28.5	18.3
1NCX.A	HOH	339								11.1	11.1
1NCX.A	HOH	341								29.9	29.9
1NCX.A	HOH	344								2.4	2.4
1NCX.A	HOH	346							12	27.5	15.5
1NCX.A	HOH	347							1.2	1.8	0.6
1NCX.A	HOH	348						0.1		1	0.9
1NCX.A	HOH	349								25	25
1NCX.A	HOH	350								26.2	26.2
1NCX.A	HOH	355							7.7	14.4	6.7
1NCX.A	HOH	357							9.4	30.2	20.7
1NCX.A	HOH	360								24.8	24.8
1NCX.A	HOH	362						5.1		12.2	7.1
1NCX.A	HOH	363								16.6	16.6
1NCX.A	HOH	364								22.1	22.1
1NCX.A	HOH	369							1.9	29.3	27.4
1NCX.A	HOH	372							3.9	11.7	7.7
1NCX.A	HOH	373								26.8	26.8
1NCX.A	HOH	375							4.3	18	13.7
1NCX.A	HOH	376						6.1		19.6	13.5
1NCX.A	HOH	379								27.5	27.5
1NCX.A	HOH	380								13.5	13.5
1NCX.A	HOH	381							1.6	20.8	19.3
1NCX.A	HOH	382								28.7	28.7
1NCX.A	HOH	385						4		11.7	7.7
1NCX.A	HOH	386							10.1	29.8	19.6
1NCX.A	HOH	387							0.9	16.4	15.6
1NCX.A	HOH	388							6.6	20.2	13.6
