# Supplementary material for: Methacrylate Coatings for Titanium Surfaces to Optimize Biocompatibility
Source: Micromachines (Basel). 2020 Jan 13;11(1):87. doi: 10.3390/mi11010087 (PMC7019220; doi:10.3390/mi11010087)
Supplement: Supplementary file 1 [file micromachines-11-00087-s001.zip › S3.csv]

Chain	Res	UID	res_ASA	res_exp	res_charge	propKa	res_hyd	res_pos	res_neg	res_tot	res_oth	ens_res_charge	ens_sc_pKa	ens_bb_pKa
3GHG.L	ARG	5	141.9	52.55	2.07	10.11		67		137.3	70.4	2
3GHG.L	ASP	6	87	49.22	-1.08	3.11			21.1	63	41.8	-1
3GHG.L	ASN	7	139.5	80.81	0.05				16.4	80.8	64.4
3GHG.L	CYS	8	15	9.61	0.05					30.9	30.9
3GHG.L	CYS	9	2.7	1.73	0.05					14	14
3GHG.L	ILE	10	53.6	24.11	-0.04				15.6	61.8	46.2
3GHG.L	LEU	11	48.2	21.24	-0.03		15.4	0.5	12	53	25.1
3GHG.L	ASP	12	55.5	31.4	-1.08	3.23			0.8	42	41.2	-1
3GHG.L	GLU	13	158.2	76.28	-1.05	4.57			44.8	91.6	46.7	-1
3GHG.L	ARG	14	139.4	51.63	1.04	12.29		30.6	7.2	112.8	75	1
3GHG.L	PHE	15	6.3	2.4	0.03				1.1	19.9	18.8
3GHG.L	GLY	16	20.3	20.23	0.06					19.2	19.2
3GHG.L	SER	17	11.1	7.62	-0.01					31.5	31.5
3GHG.L	TYR	18	2	0.75	0.03	10.96	2.7			13.1	10.4
3GHG.L	CYS	19	1.8	1.13	0.05					18.1	18.1
3GHG.L	PRO	20	3	1.73	-0.16					6.9	6.9
3GHG.L	THR	21	11.8	6.76	0		1.1			23.7	22.7
3GHG.L	THR	22	21.8	12.5	0					30.2	30.2
3GHG.L	CYS	23			0.05					0.9	0.9
3GHG.L	GLY	24	4.6	4.63	0.06				0.3	11.6	11.3
3GHG.L	ILE	25			-0.04
3GHG.L	ALA	26	5.9	4.32	0.05		4.3			12.1	7.8
3GHG.L	ASP	27	62.4	35.35	-1.08	4.08	0.7		27.5	45.2	17.1	-1
3GHG.L	PHE	28	24.7	9.44	0.03		24.2		0.2	34.6	10.3
3GHG.L	LEU	29	12.8	5.64	-0.03		15.4			22.1	6.6
3GHG.L	SER	30	55.6	38.16	-0.01				0.9	37.4	36.5
3GHG.L	THR	31	45.2	25.93	0		0.5	2.5	4.8	48.8	41
3GHG.L	TYR	32	9.8	3.72	0.03	12.79	8.7			26.6	17.8
3GHG.L	GLN	33	74	37.01	0.02		1.1			61.7	60.5
3GHG.L	THR	34	80.3	46.05	0					58.1	58.1
3GHG.L	LYS	35	119.1	50.57	1.03	10.5	9.8	49.1		91.3	32.4	1
3GHG.L	VAL	36	9.8	5.03	-0.06		14.7			25.5	10.8
3GHG.L	ASP	37	47.8	27.09	-1.08	2.89				42.7	42.7	-1
3GHG.L	LYS	38	135.2	57.44	1.03	10.5		39.1		92.9	53.7	1
3GHG.L	ASP	39	49.1	27.79	-1.08	3.94				45	45	-1
3GHG.L	LEU	40	1.5	0.65	-0.03					13.4	13.4
3GHG.L	GLN	41	98	49.03	0.02				6.6	80.7	74.1
3GHG.L	SER	42	40.6	27.88	-0.01					38.5	38.5
3GHG.L	LEU	43	3.2	1.41	-0.03					12.1	12.1
3GHG.L	GLU	44	70.4	33.96	-1.05	4.1			19.2	60.4	41.2	-1
3GHG.L	ASP	45	85.6	48.43	-1.08	3.87			47.7	58.1	10.4	-1
3GHG.L	ILE	46	81.4	36.61	-0.04				2.6	69.9	67.3
3GHG.L	LEU	47	14.8	6.52	-0.03					24.5	24.5
3GHG.L	HIS	48	107.7	48.99	0.14	6.5			13.2	82.2	68.9
3GHG.L	GLN	49	117.6	58.86	0.02			8.5	16.3	91.3	66.4
3GHG.L	VAL	50	12.5	6.38	-0.06			0.2		30.2	29.9
3GHG.L	GLU	51	28.8	13.91	-1.05	4.5			27.7	44.2	16.5	-1
3GHG.L	ASN	52	78.7	45.59	0.05				15.9	59.3	43.4
3GHG.L	LYS	53	67.3	28.59	1.03	10.36		36.5		61.9	25.4	1
3GHG.L	THR	54	17.8	10.2	0			6.7	0.4	44.9	37.8
3GHG.L	SER	55	44.7	30.65	-0.01			0.8	7	41.8	34
3GHG.L	GLU	56	79.1	38.15	-1.05	3.94			33.2	65.1	31.9	-1
3GHG.L	VAL	57	6.6	3.4	-0.06					22.4	22.4
3GHG.L	LYS	58	108.6	46.14	1.03	10.43		38.5		84.8	46.3	1
3GHG.L	GLN	59	107.3	53.69	0.02					77.5	77.5
3GHG.L	LEU	60	32	14.11	-0.03				1.4	34.2	32.8
3GHG.L	ILE	61	10.2	4.58	-0.04		13.3			28.1	14.9
3GHG.L	LYS	62	162.1	68.82	1.03	10.5		58.7		120.1	61.4	1
3GHG.L	ALA	63	53.2	38.74	0.05					47.4	47.4
3GHG.L	ILE	64	45.4	20.42	-0.04		34.8			62	27.2
3GHG.L	GLN	65	80.8	40.45	0.02		1.3			76.7	75.4
3GHG.L	LEU	66	155.2	68.4	-0.03		67.9			103	35.1
3GHG.L	THR	67	103.6	59.38	0				6.2	77.6	71.4
3GHG.L	TYR	68	40.2	15.19	0.03		30		27.5	85.7	28.2
3GHG.L	ASN	69	77	44.58	0.05				21.4	65.4	44
3GHG.L	PRO	70	130.9	76.23	-0.16				2.2	72.9	70.8
3GHG.L	ASP	71	77.9	44.12	-1.08	3.21			52.5	71.4	19	-1
3GHG.L	GLU	72	187.2	90.26	-1.05	4.64			48.5	99.9	51.4	-1
3GHG.L	SER	73	44.9	30.82	-0.01				4	55.5	51.5
3GHG.L	SER	74	119.8	82.18	-0.01					70.9	70.9
3GHG.L	LYS	75	95	40.34	1.03	10.08				84.7	84.7	1
3GHG.L	PRO	76	149.6	87.15	-0.16					79.6	79.6
3GHG.L	ASN	77	42.4	24.57	0.05					40.9	40.9
3GHG.L	MET	78	73.6	30.07	0					68.1	68.1
3GHG.L	ILE	79	41.6	18.7	-0.04				2.6	49.1	46.5
3GHG.L	ASP	80	19.8	11.19	-1.08	2.24				35.2	35.2	-1
3GHG.L	ALA	81	34.3	25.02	0.05			0.6		34.2	33.7
3GHG.L	ALA	82	22.6	16.43	0.05					32.8	32.8
3GHG.L	THR	83	11.3	6.47	0					32.8	32.8
3GHG.L	LEU	84	71.7	31.6	-0.03			8.7		51.3	42.6
3GHG.L	LYS	85	151.2	64.2	1.03	10.5		48.6		95	46.4	1
3GHG.L	SER	86	27.9	19.11	-0.01					29.9	29.9
3GHG.L	ARG	87	97.1	35.96	1.04	12.29		49		76.5	27.5	1
3GHG.L	LYS	88	145.8	61.9	1.03	10.5		48	4.9	97	44.1	1
3GHG.L	MET	89	118.9	48.62	0				16.4	83.8	67.4
3GHG.L	LEU	90	15.3	6.75	-0.03		7.2		2.4	43.3	33.7
3GHG.L	GLU	91	113.7	54.82	-1.05	4.64			35.1	74.3	39.2	-1
3GHG.L	GLU	92	59	28.42	-1.05	4.57			47.5	59.9	12.4	-1
3GHG.L	ILE	93	7.5	3.38	-0.04		17.8			41.5	23.7
3GHG.L	MET	94	121.4	49.63	0		50.3		0.1	86.6	36.1
3GHG.L	LYS	95	149	63.27	1.03	10.5		42.9		102	59.1	1
3GHG.L	TYR	96	32.2	12.18	0.03		10.2		10.7	53.7	32.9
3GHG.L	GLU	97	46.8	22.55	-1.05	4.78	5.4			48.1	42.7	-1
3GHG.L	ALA	98	55.8	40.65	0.05		0.1			37.8	37.7
3GHG.L	SER	99	15.5	10.65	-0.01					16.2	16.2
3GHG.L	ILE	100	29	13.04	-0.04		5.2	2.9		38.2	30.1
3GHG.L	LEU	101	138.5	61.03	-0.03		52.1			84.9	32.9
3GHG.L	THR	102	102.2	58.58	0					68.9	68.9
3GHG.L	HIS	103	35.9	16.31	0.15	6.55	0.3			44.9	44.6
3GHG.L	ASP	104	6.7	3.77	-1.08	4.22				19.9	19.9	-1
3GHG.L	SER	105	55.8	38.27	-0.01			0.4		42.4	42
3GHG.L	SER	106	23.4	16.07	-0.01					21.9	21.9
3GHG.L	ILE	107	24.5	11.04	-0.04		3			44.1	41.1
3GHG.L	ARG	108	166.2	61.55	1.04	12.08		39		108.1	69.1	1
3GHG.L	TYR	109	80.5	30.46	0.03	13.41		1.5		71.9	70.4
3GHG.L	LEU	110	0.9	0.38	-0.03		5.7			18.4	12.7
3GHG.L	GLN	111	52.4	26.22	0.02					45.4	45.4
3GHG.L	GLU	112	105.7	50.98	-1.05	4.5			32	66.9	34.8	-1
3GHG.L	ILE	113	4.2	1.88	-0.04					14.8	14.8
3GHG.L	TYR	114	21.6	8.16	0.02	9.34				22.5	22.5
3GHG.L	ASN	115	48.8	28.29	0.05				12.1	42.3	30.2
3GHG.L	SER	116	29.2	20.04	-0.01				0.7	27.6	26.9
3GHG.L	ASN	117			0.05					2.8	2.8
3GHG.L	ASN	118	49.6	28.74	0.05					47.8	47.8
3GHG.L	GLN	119	114.5	57.29	0.02				12.7	81.6	68.9
3GHG.L	LYS	120	74.1	31.46	1.03	10.22		21.2		62.7	41.5	1
3GHG.L	ILE	121	13.3	6	-0.04				1.3	25.7	24.4
3GHG.L	VAL	122	105.9	54.21	-0.06				4.6	74.9	70.4
3GHG.L	ASN	123	72.7	42.13	0.05			3.6	10.9	53.1	38.5
3GHG.L	LEU	124			-0.03
3GHG.L	LYS	125	91.2	38.71	1.03	10.58		44.9		81.1	36.2	1
3GHG.L	GLU	126	109.6	52.82	-1.05	4.5			50	76.8	26.8	-1
3GHG.L	LYS	127	73.6	31.24	1.03	10.5		32.1	0.3	60.2	27.8	1
3GHG.L	VAL	128	0.9	0.45	-0.06					0.1	0.1
3GHG.L	ALA	129	46.6	33.95	0.05				2.5	42.2	39.7
3GHG.L	GLN	130	104.2	52.16	0.02				9.3	75.5	66.2
3GHG.L	LEU	131			-0.03
3GHG.L	GLU	132	44.3	21.34	-1.05	1.56			31.4	38.8	7.4	-1
3GHG.L	ALA	133	65.9	47.98	0.05					44	44
3GHG.L	GLN	134	86.7	43.39	0.02					71.8	71.8
3GHG.L	CYS	135			0.05					2	2
3GHG.L	GLN	136	54.5	27.28	0.02			6.7	1.1	52	44.2
3GHG.L	GLU	137	104.8	50.51	-1.05	4.53			32.3	70.8	38.6	-1
3GHG.L	PRO	138	52.7	30.66	-0.16				2	61	59
3GHG.L	CYS	139	14.6	9.33	0.05					14.3	14.3
3GHG.L	LYS	140	114.9	48.8	1.03	10.5		45.2		100.9	55.8	1
3GHG.L	ASP	141	23.9	13.52	-1.08	3.05				36.4	36.4	-1
3GHG.L	THR	142	87.7	50.28	0					60.6	60.6
3GHG.L	VAL	143	0.9	0.46	-0.06					8.5	8.5
3GHG.L	GLN	144	131.5	65.78	0.02			0.2		99.4	99.2
3GHG.L	ILE	145	42.5	19.11	-0.04			6.2		51.6	45.4
3GHG.L	HIS	146	44.6	20.28	0.26	6.88				50.9	50.9
3GHG.L	ASP	147	151.7	85.87	-1.08	3.28				81.8	81.8	-1
3GHG.L	ILE	148	74.7	33.59	-0.04					61	61
3GHG.L	THR	149	51.3	29.43	0			2.9		44	41.2
3GHG.L	GLY	150			0.06
3GHG.L	LYS	151	76.5	32.49	1.03	10.22	6.4	29.1		59.1	23.7	1
3GHG.L	ASP	152	7.5	4.25	-1.02	6.18				11.6	11.6	-1
3GHG.L	CYS	153			0.05
3GHG.L	GLN	154	0.9	0.44	0.02			0.4		6.9	6.5
3GHG.L	ASP	155	27.8	15.73	-1.08	3.84				24.2	24.2	-1
3GHG.L	ILE	156			-0.04
3GHG.L	ALA	157	6	4.4	0.05					6.7	6.7
3GHG.L	ASN	158	97.4	56.43	0.05			10.1		63.9	53.8
3GHG.L	LYS	159	126.2	53.57	1.03	10.29		28.8		85	56.1	1
3GHG.L	GLY	160	51.3	51.18	0.06					33.6	33.6
3GHG.L	ALA	161	5.8	4.26	0.05					5.6	5.6
3GHG.L	LYS	162	144.1	61.2	1.03	10.5		37.8		109	71.2	1
3GHG.L	GLN	163	126.1	63.12	0.02					69.9	69.9
3GHG.L	SER	164	39.4	27.01	-0.01					35.7	35.7
3GHG.L	GLY	165			0.06					1.1	1.1
3GHG.L	LEU	166			-0.03
3GHG.L	TYR	167	3.8	1.42	0.01	9.23				11.1	11.1
3GHG.L	PHE	168	17.7	6.75	0.03					32.1	32.1
3GHG.L	ILE	169			-0.04
3GHG.L	LYS	170	93	39.48	1.03	10.5				75.9	75.9	1
3GHG.L	PRO	171	1	0.59	-0.16					3.7	3.7
3GHG.L	LEU	172	114.1	50.29	-0.03		41.4			78.2	36.8
3GHG.L	LYS	173	131	55.63	1.03	10.01	14.1	35.2		90.9	41.6	1
3GHG.L	ALA	174	6.4	4.69	0.05					15.2	15.2
3GHG.L	ASN	175	141.6	82.04	0.05					83.4	83.4
3GHG.L	GLN	176	36.4	18.23	0.02			1.2		60.4	59.3
3GHG.L	GLN	177	26.2	13.13	0.02					35.6	35.6
3GHG.L	PHE	178	14.3	5.47	0.03					29.1	29.1
3GHG.L	LEU	179	5.5	2.41	-0.03					21.8	21.8
3GHG.L	VAL	180			-0.06
3GHG.L	TYR	181	12.3	4.64	0.03	10.56				17.1	17.1
3GHG.L	CYS	182			0.05
3GHG.L	GLU	183	57.7	27.8	-1.05	2.45				41	41	-1
3GHG.L	ILE	184	18.4	8.28	-0.04					21.1	21.1
3GHG.L	ASP	185	52.7	29.83	-1.08	2.64				37.6	37.6	-1
3GHG.L	GLY	186	89.6	89.37	0.06					47.9	47.9
3GHG.L	SER	187	79.7	54.67	-0.01					56	56
3GHG.L	GLY	188	12.5	12.47	0.06			0.5		17.2	16.7
3GHG.L	ASN	189	17.8	10.31	0.05					22.7	22.7
3GHG.L	GLY	190			0.06
3GHG.L	TRP	191	21.6	6.94	0.02					26.1	26.1
3GHG.L	THR	192			0
3GHG.L	VAL	193			-0.06					6.7	6.7
3GHG.L	PHE	194			0.03
3GHG.L	GLN	195			0.02
3GHG.L	LYS	196	16.1	6.82	0.95	8.45				28.6	28.6	1
3GHG.L	ARG	197	2.2	0.8	1.04	10.88				8.1	8.1	1
3GHG.L	LEU	198	37.6	16.58	-0.03				0.5	33.4	32.9
3GHG.L	ASP	199	71.3	40.34	-1.01	6.29			26.2	49.3	23.1	-1
3GHG.L	GLY	200	31.9	31.83	0.06				17	24.9	7.9
3GHG.L	SER	201	66	45.24	-0.01				16.1	54	37.8
3GHG.L	VAL	202	23.6	12.05	-0.06					32	32
3GHG.L	ASP	203	107.1	60.61	-1.08	1.78				61.5	61.5	-1
3GHG.L	PHE	204	1.6	0.62	0.03					11.8	11.8
3GHG.L	LYS	205	105.4	44.76	1.03	10.43				82.7	82.7	1
3GHG.L	LYS	206	30.1	12.79	1.03	9.93				44.5	44.5	1
3GHG.L	ASN	207	23.8	13.79	0.05					29	29
3GHG.L	TRP	208	15.2	4.89	0.02					29.7	29.7
3GHG.L	ILE	209	86.3	38.83	-0.04					65.9	65.9
3GHG.L	GLN	210	9.1	4.57	0.02					22.3	22.3
3GHG.L	TYR	211			0.03	11.17				1.5	1.5
3GHG.L	LYS	212	40.1	17.01	1.03	12.59				43.2	43.2	1
3GHG.L	GLU	213	23.4	11.29	-1.05	2				23.5	23.5	-1
3GHG.L	GLY	214			0.06					2.9	2.9
3GHG.L	PHE	215	15.2	5.79	0.03					22.6	22.6
3GHG.L	GLY	216	3	3.01	0.06					14.3	14.3
3GHG.L	HIS	217	24.4	11.09	0.03	3.37				32.1	32.1
3GHG.L	LEU	218			-0.03					5.9	5.9
3GHG.L	SER	219			-0.01					4.9	4.9
3GHG.L	PRO	220	23.5	13.71	-0.16					30.8	30.8
3GHG.L	THR	221	117.3	67.23	0				0.2	66.8	66.6
3GHG.L	GLY	222	11.8	11.72	0.06					8.7	8.7
3GHG.L	THR	223	80.7	46.29	0				13.1	56.2	43.1
3GHG.L	THR	224	0.9	0.52	0				0.8	15.1	14.3
3GHG.L	GLU	225			-1.05	1.27				9.7	9.7	-1
3GHG.L	PHE	226			0.03					2.4	2.4
3GHG.L	TRP	227			0.02
3GHG.L	LEU	228			-0.03
3GHG.L	GLY	229			0.06
3GHG.L	ASN	230			0.05					3.6	3.6
3GHG.L	GLU	231	36.5	17.59	-1.05	1.93				35.8	35.8	-1
3GHG.L	LYS	232	12.5	5.33	0.08	6.48		9.8		30.7	20.9	1
3GHG.L	ILE	233			-0.04
3GHG.L	HIS	234	21.8	9.92	0.05	5.81		6.1		24.1	18
3GHG.L	LEU	235	30.6	13.5	-0.03					31.8	31.8
3GHG.L	ILE	236			-0.04
3GHG.L	SER	237			-0.01
3GHG.L	THR	238	22.5	12.91	0			0		25.3	25.3
3GHG.L	GLN	239	3.8	1.91	0.02					9.7	9.7
3GHG.L	SER	240	54.7	37.52	-0.01			6.6		53.5	46.9
3GHG.L	ALA	241	89.2	64.95	0.05					56.2	56.2
3GHG.L	ILE	242	108.6	48.88	-0.04		54.4			77.5	23.1
3GHG.L	PRO	243	35.9	20.89	-0.16		14.6			40.6	26.1
3GHG.L	TYR	244	3.5	1.34	0.03		2.7			12.9	10.2
3GHG.L	ALA	245			0.05
3GHG.L	LEU	246			-0.03
3GHG.L	ARG	247	48.7	18.04	1.04	13.74				38.2	38.2	1
3GHG.L	VAL	248			-0.06
3GHG.L	GLU	249	43.1	20.79	-1.05	2.97			27	33.8	6.7	-1
3GHG.L	LEU	250			-0.03				3.5	3.7	0.2
3GHG.L	GLU	251	34.5	16.65	-1.05	3.98			20.5	25.4	5	-1
3GHG.L	ASP	252	2.4	1.38	-1.08	2.8				3.2	3.2	-1
3GHG.L	TRP	253	68.8	22.12	0.02			9.7		49.6	39.9
3GHG.L	ASN	254	110.2	63.8	0.05			11.3		72.2	60.8
3GHG.L	GLY	255	47.7	47.56	0.06				9.5	30.6	21.1
3GHG.L	ARG	256	166.9	61.8	1.04	12.36		46.1		103.7	57.6	1
3GHG.L	THR	257	68.6	39.32	0				13.5	60.3	46.9
3GHG.L	SER	258	3.4	2.3	-0.01					10.3	10.3
3GHG.L	THR	259	31.5	18.04	0					27.8	27.8
3GHG.L	ALA	260			0.05
3GHG.L	ASP	261	6.8	3.86	-1.08	1.94				10.7	10.7	-1
3GHG.L	TYR	262			0.03				0.7	1.5	0.8
3GHG.L	ALA	263			0.05		1.2			1.2
3GHG.L	MET	264	66.7	27.27	0		28.3			47.5	19.2
3GHG.L	PHE	265			0.03
3GHG.L	LYS	266	54.4	23.1	1.03	10.08				57.7	57.7	1
3GHG.L	VAL	267			-0.06					0.1	0.1
3GHG.L	GLY	268	10.4	10.32	0.06					14.7	14.7
3GHG.L	PRO	269	71.5	41.64	-0.16					48.1	48.1
3GHG.L	GLU	270	60.2	29.02	-1.05	3.25				47.7	47.7	-1
3GHG.L	ALA	271	105	76.48	0.05					61.9	61.9
3GHG.L	ASP	272	51.5	29.16	-1.08	2.8				39.9	39.9	-1
3GHG.L	LYS	273	58	24.62	1.03	10.36				46.6	46.6	1
3GHG.L	TYR	274			0.03					4.2	4.2
3GHG.L	ARG	275	71.5	26.46	1.04	11.87		17.2		69.7	52.5	1
3GHG.L	LEU	276			-0.03
3GHG.L	THR	277	68.6	39.34	0					44.1	44.1
3GHG.L	TYR	278	18.4	6.94	0.03	12.61			0.1	17.4	17.3
3GHG.L	ALA	279	57.6	41.96	0.05		5.1			34.7	29.5
3GHG.L	TYR	280	119.1	45.06	0.03	10	45.7			94.3	48.5
3GHG.L	PHE	281	67.6	25.8	0.03				2.1	48.6	46.4
3GHG.L	ALA	282	42.9	31.24	0.05		5.7			35	29.3
3GHG.L	GLY	283	33	32.87	0.06					25.4	25.4
3GHG.L	GLY	284	32	31.86	0.06					27.9	27.9
3GHG.L	ASP	285	120.4	68.16	-1.08	3.09				73.7	73.7	-1
3GHG.L	ALA	286			0.05
3GHG.L	GLY	287	18.1	18.02	0.06					17.8	17.8
3GHG.L	ASP	288	22.3	12.62	-1.08	3.62			11.3	23	11.8	-1
3GHG.L	ALA	289			0.05
3GHG.L	PHE	290			0.03					0.4	0.4
3GHG.L	ASP	291	73.8	41.8	-1.08	3.14			38.2	54.9	16.7	-1
3GHG.L	GLY	292			0.06					2.5	2.5
3GHG.L	PHE	293	69.9	26.69	0.03					50.7	50.7
3GHG.L	ASP	294	76.6	43.38	-1.08	3.02				58.8	58.8	-1
3GHG.L	PHE	295	36	13.74	0.03				9.8	47	37.3
3GHG.L	GLY	296	78.8	78.56	0.06				15.2	42.9	27.7
3GHG.L	ASP	297	94	53.2	-1.08	3.29			40.3	63	22.7	-1
3GHG.L	ASP	298	55.2	31.22	-1.08	2.42			29.6	50.6	21	-1
3GHG.L	PRO	299	133.5	77.77	-0.16				2.7	82.2	79.5
3GHG.L	SER	300	41.9	28.76	-0.01				5.4	33.9	28.5
3GHG.L	ASP	301	15	8.5	-1.08	2.12			8.7	17.7	9.1	-1
3GHG.L	LYS	302	77.9	33.08	1.03	9.87			1.2	64	62.8	1
3GHG.L	PHE	303	160.1	61.1	0.03		66.6			99.7	33.1
3GHG.L	PHE	304	50	19.09	0.03		24.3			36.4	12.1
3GHG.L	THR	305	6.3	3.6	0					14	14
3GHG.L	SER	306	27.1	18.55	-0.01					26.8	26.8
3GHG.L	HIS	307			0.03	1.28
3GHG.L	ASN	308	48.2	27.92	0.05					44.9	44.9
3GHG.L	GLY	309	22.9	22.82	0.06					21.5	21.5
3GHG.L	MET	310	24.5	10	0			5.8		24.8	19
3GHG.L	GLN	311	27.9	13.95	0.02			0.3		34.3	33.9
3GHG.L	PHE	312			0.03					4.1	4.1
3GHG.L	SER	313			-0.01
3GHG.L	THR	314			0
3GHG.L	TRP	315	121.2	38.97	0.02		51.9		12.7	75.2	10.6
3GHG.L	ASP	316	57.8	32.72	-1.08	2.09	1		14.9	45.1	29.2	-1
3GHG.L	ASN	317	32	18.53	0.05					31.5	31.5
3GHG.L	ASP	318	63.9	36.18	-1.08	4.35			1.6	50.4	48.7	-1
3GHG.L	ASN	319	33.8	19.55	0.05					35.4	35.4
3GHG.L	ASP	320	14	7.95	-1.08	1.87				10.8	10.8	-1
3GHG.L	LYS	321	119	50.54	1.03	10.5	5.8	47.5		89.6	36.4	1
3GHG.L	PHE	322	59.7	22.79	0.03		27.6			58.4	30.7
3GHG.L	GLU	323	200.1	96.48	-1.05	4.5			40.4	102.8	62.4	-1
3GHG.L	GLY	324	21.9	21.84	0.06					20.7	20.7
3GHG.L	ASN	325	23.6	13.66	0.05				5.1	25.4	20.3
3GHG.L	CYS	326	0.8	0.54	0.05		0.4			5.2	4.7
3GHG.L	ALA	327			0.05
3GHG.L	GLU	328	79.1	38.11	-1.05	4.99			23.9	55	31.1	-1
3GHG.L	GLN	329	53.9	26.97	0.02				0.2	66.3	66.2
3GHG.L	ASP	330	5.7	3.23	-1.08	4.43			9.5	23	13.4	-1
3GHG.L	GLY	331	7	6.98	0.06					14.9	14.9
3GHG.L	SER	332			-0.01
3GHG.L	GLY	333			0.06
3GHG.L	TRP	334			0.02
3GHG.L	TRP	335			0.02
3GHG.L	MET	336			0
3GHG.L	ASN	337	3.2	1.85	0.05					12	12
3GHG.L	LYS	338	79.5	33.75	1.03	10.22	12.4			69.5	57.1	1
3GHG.L	CYS	339	31.7	20.34	0.05		7.4			25.5	18.1
3GHG.L	HIS	340	5.4	2.44	0.03	2.49			11.9	22.9	11
3GHG.L	ALA	341			0.05
3GHG.L	GLY	342			0.06
3GHG.L	HIS	343			0
3GHG.L	LEU	344			-0.03
3GHG.L	ASN	345			0.05
3GHG.L	GLY	346			0.06					2.7	2.7
3GHG.L	VAL	347	67.3	34.44	-0.06					46.8	46.8
3GHG.L	TYR	348	10.3	3.91	0.03	10.42		4.2	4.9	30	20.9
3GHG.L	TYR	349	28.9	10.92	0.02	9.63				38.9	38.9
3GHG.L	GLN	350	143.9	72.01	0.02			9.6	6.5	86.8	70.7
3GHG.L	GLY	351	22.4	22.32	0.06					26.5	26.5
3GHG.L	GLY	352			0.06
3GHG.L	THR	353	112.5	64.52	0					71.8	71.8
3GHG.L	TYR	354	15.5	5.85	0.03	12.85				19.6	19.6
3GHG.L	SER	355	56	38.37	-0.01			1.9		41.1	39.2
3GHG.L	LYS	356	133.7	56.78	1.03	10.5		58.5		87.5	29.1	1
3GHG.L	ALA	357	94.9	69.11	0.05			1.3		55.1	53.7
3GHG.L	SER	358	63.1	43.26	-0.01					41.5	41.5
3GHG.L	THR	359	10.8	6.17	0					25.4	25.4
3GHG.L	PRO	360	146.6	85.39	-0.16					86.2	86.2
3GHG.L	ASN	361	86.5	50.09	0.05					67.3	67.3
3GHG.L	GLY	362	16.8	16.77	0.06					21.9	21.9
3GHG.L	TYR	363	142.4	53.89	0.03	10			5.7	98.6	92.9
3GHG.L	ASP	364	18.2	10.3	-0.92	6.68			17.2	25.9	8.8	-1
3GHG.L	ASN	365	8.6	4.96	0.05					14.7	14.7
3GHG.L	GLY	366			0.06
3GHG.L	ILE	367			-0.04
3GHG.L	ILE	368			-0.04				2.2	10.3	8.1
3GHG.L	TRP	369			0.02					7.8	7.8
3GHG.L	ALA	370	3.6	2.65	0.05					10	10
3GHG.L	THR	371	40.8	23.38	0					26.3	26.3
3GHG.L	TRP	372	56.3	18.1	0.02					55.2	55.2
3GHG.L	LYS	373	43.1	18.28	1.03	9.87		21		53.9	32.9	1
3GHG.L	THR	374	88.1	50.53	0					60.6	60.6
3GHG.L	ARG	375	54	20	1.04	12.25			0.1	70.6	70.5	1
3GHG.L	TRP	376	68.7	22.09	0.02					60.1	60.1
3GHG.L	TYR	377	15.4	5.82	0.03	10.08				26	26
3GHG.L	SER	378			-0.01
3GHG.L	MET	379			0					1.9	1.9
3GHG.L	LYS	380	55.2	23.45	1.03	10.15		38.3		48.9	10.5	1
3GHG.L	LYS	381	54.9	23.33	1.03	10.01		19.5		55.3	35.8	1
3GHG.L	THR	382			0
3GHG.L	THR	383	16.3	9.33	0				2.5	23.5	21
3GHG.L	MET	384			0
3GHG.L	LYS	385	6	2.54	1.03	11.78			0.2	23.9	23.7	1
3GHG.L	ILE	386			-0.04
3GHG.L	ILE	387			-0.04					4.3	4.3
3GHG.L	PRO	388	12.4	7.21	-0.16		6			23	16.9
3GHG.L	PHE	389	30.1	11.48	0.03		25.9			42.3	16.4
3GHG.L	ASN	390	92	53.27	0.05		0.3	12.4		68	55.3
3GHG.L	ARG	391	57.2	21.2	1.04	11.73		25.9		60.3	34.4	1
3GHG.L	LEU	392	47.8	21.08	-0.03		17.1			56.8	39.7
3GHG.L	THR	393	100.6	57.65	0		14.1			62.4	48.4
3GHG.L	ILE	394	167.1	75.17	-0.04		49			99.6	50.6
3GHG.L	GLY	395	60.6	60.41	0					49.4	49.4
3GHG.L	CA	601								8.5	8.5	2
3GHG.K	LYS	58	266.4	113.13	2.05	9.11		100.4		134.8	34.4	2
3GHG.K	ALA	59	53.3	38.86	0.05			6		49.3	43.3
3GHG.K	PRO	60	39.1	22.76	-0.16		0.2		3.1	49.3	46.1
3GHG.K	ASP	61	50.7	28.72	-1.08	3.84				58.8	58.8	-1
3GHG.K	ALA	62	60.2	43.87	0.05					40.5	40.5
3GHG.K	GLY	63	31.9	31.79	0.06			8.1		23.3	15.2
3GHG.K	GLY	64	13	13.01	0.06			4.3		16.5	12.2
3GHG.K	CYS	65	6.9	4.42	0.05					10.2	10.2
3GHG.K	LEU	66	38.6	17	-0.03		27.3			43.6	16.2
3GHG.K	HIS	67	43	19.54	0.14	6.5	1.9			42.3	40.4
3GHG.K	ALA	68	107.8	78.51	0.05		0.2		7.2	67.7	60.3
3GHG.K	ASP	69	61.9	35.02	-1.08	3.05			31.6	45.1	13.4	-1
3GHG.K	PRO	70	150.1	87.4	-0.16				10.8	93.1	82.3
3GHG.K	ASP	71	72.9	41.27	-1.08	3.84			51.3	58.9	7.6	-1
3GHG.K	LEU	72	28.6	12.62	-0.03		22.1		7.3	36.9	7.5
3GHG.K	GLY	73	11.3	11.26	0.06					14	14
3GHG.K	VAL	74	33.7	17.23	-0.06		24.9			45.2	20.3
3GHG.K	LEU	75			-0.03
3GHG.K	CYS	76	9.9	6.35	0.05		5.7			23.5	17.8
3GHG.K	PRO	77	7.4	4.29	-0.16			6.8		12.9	6.1
3GHG.K	THR	78	10.6	6.06	0					17.7	17.7
3GHG.K	GLY	79	5.6	5.6	0.06					18.1	18.1
3GHG.K	CYS	80	7	4.49	0.05			0.3		30.9	30.6
3GHG.K	GLN	81	48.6	24.31	0.02			12.2		46.4	34.2
3GHG.K	LEU	82			-0.03					1.3	1.3
3GHG.K	GLN	83			0.02		0.2			11.9	11.8
3GHG.K	GLU	84	34.5	16.62	-1.05	3.98				50.7	50.7	-1
3GHG.K	ALA	85	9.8	7.16	0.05			2.8		16.6	13.9
3GHG.K	LEU	86			-0.03		0.9			4.3	3.4
3GHG.K	LEU	87	64	28.22	-0.03		38	0.5		61.9	23.4
3GHG.K	GLN	88	105.7	52.89	0.02			10.6		61.7	51.1
3GHG.K	GLN	89	39.9	19.94	0.02			11.7		41.6	29.9
3GHG.K	GLU	90	36.5	17.6	-1.05	4.9	1.4			36	34.6	-1
3GHG.K	ARG	91	117.5	43.49	1.04	12.01		49.3		86.6	37.3	1
3GHG.K	PRO	92	74.1	43.15	-0.16					61.9	61.9
3GHG.K	ILE	93	1.9	0.86	-0.04					17.3	17.3
3GHG.K	ARG	94	110.5	40.93	1.04	12.43		29.6		97.1	67.5	1
3GHG.K	ASN	95	90.8	52.57	0.05				15.3	67.4	52.1
3GHG.K	SER	96	23.8	16.34	-0.01			2.9		26.7	23.8
3GHG.K	VAL	97	13.2	6.76	-0.06		8.7			29.5	20.8
3GHG.K	ASP	98	85.6	48.46	-1.08	3.77			37.5	56	18.6	-1
3GHG.K	GLU	99	104.3	50.27	-1.05	4.5			37.2	63.5	26.4	-1
3GHG.K	LEU	100	9.2	4.05	-0.03		9.9			16.4	6.5
3GHG.K	ASN	101	48.6	28.16	0.05				0.6	47.2	46.6
3GHG.K	ASN	102	80.9	46.88	0.05				10.5	53.2	42.7
3GHG.K	ASN	103	43.7	25.29	0.05		0.4			39.7	39.3
3GHG.K	VAL	104	1.8	0.91	-0.06					7.4	7.4
3GHG.K	GLU	105	46.8	22.56	-1.05	5.27				50.4	50.4	-1
3GHG.K	ALA	106	70.8	51.54	0.05					48	48
3GHG.K	VAL	107	115.7	59.23	-0.06					77.7	77.7
3GHG.K	SER	108	14.3	9.84	-0.01					28.5	28.5
3GHG.K	GLN	109	110.9	55.52	0.02					79.3	79.3
3GHG.K	THR	110	88.7	50.87	0					65.6	65.6
3GHG.K	SER	111	10.7	7.33	-0.01					32.8	32.8
3GHG.K	SER	112	15.4	10.58	-0.01			4		17.4	13.5
3GHG.K	SER	113	55.9	38.37	-0.01					44.3	44.3
3GHG.K	SER	114	53.3	36.56	-0.01					49.2	49.2
3GHG.K	PHE	115	18.2	6.94	0.03					37.7	37.7
3GHG.K	GLN	116	72.5	36.28	0.02					63.6	63.6
3GHG.K	TYR	117	79.2	29.95	0.03	10	29			65.7	36.7
3GHG.K	MET	118	4.7	1.91	0		8.6			20.8	12.1
3GHG.K	TYR	119	132.1	49.97	0.03	13.99			7.2	96.1	88.9
3GHG.K	LEU	120	97.9	43.14	-0.03		47.1			79	31.9
3GHG.K	LEU	121	78	34.38	-0.03		49.5			72.2	22.7
3GHG.K	LYS	122	27.6	11.74	1.03	10.01	19			54	35	1
3GHG.K	ASP	123	35.8	20.27	-1.08	4		0.3		35.6	35.3	-1
3GHG.K	LEU	124	122	53.77	-0.03		55.2	0.8		79.2	23.2
3GHG.K	TRP	125	57.7	18.54	0.02		57.8			82.7	24.9
3GHG.K	GLN	126	86.8	43.43	0.02		1.2			64.7	63.5
3GHG.K	LYS	127	124.9	53.02	1.03	10.22	16.4	40.1		97.4	40.9	1
3GHG.K	ARG	128	58.3	21.59	1.04	12.08	4.9			75.1	70.2	1
3GHG.K	GLN	129	53.2	26.65	0.02		2			59.7	57.7
3GHG.K	LYS	130	135.9	57.73	1.03	10.5		58.2		111.1	52.9	1
3GHG.K	GLN	131	43.8	21.91	0.02			7.7		50.1	42.4
3GHG.K	VAL	132	53.4	27.32	-0.06		19.5			45	25.4
3GHG.K	LYS	133	128.2	54.44	1.03	10.5		42.6	3.4	95.8	49.7	1
3GHG.K	ASP	134	80.3	45.44	-1.08	4.01			31.1	49.3	18.2	-1
3GHG.K	ASN	135	13.9	8.06	0.05					24.7	24.7
3GHG.K	GLU	136	35	16.88	-1.05	4.74			18.2	36.7	18.5	-1
3GHG.K	ASN	137	75.2	43.56	0.05				20	56.1	36.1
3GHG.K	VAL	138	44.7	22.9	-0.06				0.9	38	37.1
3GHG.K	VAL	139	28.2	14.41	-0.06					39.9	39.9
3GHG.K	ASN	140	37.2	21.56	0.05				2.5	39.8	37.3
3GHG.K	GLU	141	94.8	45.7	-1.05	4.99			34.7	62.8	28.1	-1
3GHG.K	TYR	142	73.6	27.86	0.02	9.82				94.2	94.2
3GHG.K	SER	143	12.9	8.87	-0.01					31.6	31.6
3GHG.K	SER	144	43.4	29.75	-0.01			9.6	2.1	32.6	20.9
3GHG.K	GLU	145	71.1	34.26	-1.05	4.5				64.4	64.4	-1
3GHG.K	LEU	146	16.7	7.35	-0.03		19.3			51.9	32.5
3GHG.K	GLU	147	35.2	16.98	-1.05	4.58			20.2	49.8	29.6	-1
3GHG.K	LYS	148	106.8	45.35	1.03	10.01	17	27.3		84.3	40.1	1
3GHG.K	HIS	149	10.6	4.82	0.03	5.16	4.4			41.3	36.8
3GHG.K	GLN	150	17.3	8.67	0.02		4.5		4	60.6	52.1
3GHG.K	LEU	151	82.5	36.37	-0.03		35.6		6.4	65	23.1
3GHG.K	TYR	152	64.4	24.35	-0.19	7.95	4.3	1.4		75.2	69.4
3GHG.K	ILE	153	13.9	6.24	-0.04		10.9			30.7	19.9
3GHG.K	ASP	154	42.8	24.24	-1.08	3.14			33.5	36	2.5	-1
3GHG.K	GLU	155	74.1	35.73	-1.05	3.84	0.4		33.9	55.2	21	-1
3GHG.K	THR	156	2.1	1.19	0		4.5			11.1	6.6
3GHG.K	VAL	157	6.9	3.52	-0.06		26.2			27.7	1.5
3GHG.K	ASN	158	62.6	36.27	0.05				1.9	52.5	50.5
3GHG.K	SER	159	59.4	40.76	-0.01				13.4	39.7	26.3
3GHG.K	ASN	160	43.2	25.03	0.05					48.3	48.3
3GHG.K	ILE	161	6.2	2.81	-0.04		23.9			34.5	10.6
3GHG.K	PRO	162	50.9	29.64	-0.16					43	43
3GHG.K	THR	163	65.8	37.75	0			2.8		45.2	42.4
3GHG.K	ASN	164	10.6	6.12	0.05					22.7	22.7
3GHG.K	LEU	165	12.4	5.48	-0.03		16.2			40.6	24.4
3GHG.K	ARG	166	137.3	50.84	1.04	11.94		34.9		93.3	58.4	1
3GHG.K	VAL	167	10.2	5.23	-0.06			2.2		20.6	18.4
3GHG.K	LEU	168			-0.03		7.1			8.3	1.2
3GHG.K	ARG	169	77.2	28.59	1.04	12.01				58.4	58.4	1
3GHG.K	SER	170	59.9	41.05	-0.01					41.5	41.5
3GHG.K	ILE	171			-0.04
3GHG.K	LEU	172			-0.03					5	5
3GHG.K	GLU	173	69.7	33.6	-1.05	3.91				51.4	51.4	-1
3GHG.K	ASN	174	41.4	24.01	0.05				1.6	34	32.3
3GHG.K	LEU	175	1.4	0.63	-0.03
3GHG.K	ARG	176	123.1	45.6	1.04	12.5		38.6		86.9	48.2	1
3GHG.K	SER	177	56.7	38.91	-0.01					44.7	44.7
3GHG.K	LYS	178	28.9	12.25	1.03	11.87		6.2		35.5	29.4	1
3GHG.K	ILE	179			-0.04					2.2	2.2
3GHG.K	GLN	180	118.7	59.39	0.02					73	73
3GHG.K	LYS	181	124.2	52.73	1.03	10.5		39.7		86.2	46.5	1
3GHG.K	LEU	182	0.9	0.38	-0.03					14.7	14.7
3GHG.K	GLU	183	29.7	14.31	-1.05	3.98				34.8	34.8	-1
3GHG.K	SER	184	65.1	44.61	-0.01					44.8	44.8
3GHG.K	ASP	185	18.2	10.29	-1.08	3.23				23.1	23.1	-1
3GHG.K	VAL	186			-0.06
3GHG.K	SER	187	59.1	40.54	-0.01			5.6	3.6	46.6	37.3
3GHG.K	ALA	188	22.4	16.28	0.05					23	23
3GHG.K	GLN	189			0.02
3GHG.K	MET	190	49.4	20.18	0			0.2		48.8	48.6
3GHG.K	GLU	191	106.4	51.29	-1.05	4.57			40.9	75.5	34.7	-1
3GHG.K	TYR	192	60.7	22.96	0.02	9.75		4.1		50.2	46.1
3GHG.K	CYS	193	17.8	11.42	0.05					21.5	21.5
3GHG.K	ARG	194	204.3	75.65	1.04	12.5		39.1		129.3	90.2	1
3GHG.K	THR	195	83.2	47.67	0					47.6	47.6
3GHG.K	PRO	196	59.8	34.85	-0.16			1.4		58.2	56.8
3GHG.K	CYS	197	13.9	8.91	0.05					15.8	15.8
3GHG.K	THR	198	87.9	50.37	0					60.1	60.1
3GHG.K	VAL	199	9	4.6	-0.06					22	22
3GHG.K	SER	200	36.7	25.16	-0.01					29.4	29.4
3GHG.K	CYS	201	1.2	0.77	0.05					4.1	4.1
3GHG.K	ASN	202	10.8	6.23	0.05					16.7	16.7
3GHG.K	ILE	203			-0.04					3.9	3.9
3GHG.K	PRO	204	1.8	1.03	-0.16					8.9	8.9
3GHG.K	VAL	205	0.4	0.23	-0.06					10.9	10.9
3GHG.K	VAL	206	2.6	1.35	-0.06			0.7		16.7	16
3GHG.K	SER	207	10.9	7.47	-0.01			5.9		33.3	27.4
3GHG.K	GLY	208			0.06			2.8		3.1	0.3
3GHG.K	LYS	209	73	31	1.02	9.45	20.1	25		66	20.9	1
3GHG.K	GLU	210	2.7	1.31	-1.03	5.85				7.1	7.1	-1
3GHG.K	CYS	211			0.05
3GHG.K	GLU	212	44.6	21.51	-1.05	4.39			24.4	32.2	7.8	-1
3GHG.K	GLU	213	25.8	12.46	-1.05		0.2			28.2	28	-1
3GHG.K	ILE	214			-0.04
3GHG.K	ILE	215	27.7	12.46	-0.04				2.3	36.1	33.8
3GHG.K	ARG	216	163.3	60.47	1.04	12.29			2.2	107.4	105.1	1
3GHG.K	LYS	217	24.9	10.6	1.03	13.04		15.7		49.1	33.4	1
3GHG.K	GLY	218	9.4	9.41	0.06					23	23
3GHG.K	GLY	219	6.7	6.64	0.06					8.9	8.9
3GHG.K	GLU	220	86.5	41.72	-1.05	4.68				71.5	71.5	-1
3GHG.K	THR	221	90.7	52.02	0					64.4	64.4
3GHG.K	SER	222	19	13.03	-0.01					23.9	23.9
3GHG.K	GLU	223	0.4	0.21	-1.05	5.33				3.1	3.1	-1
3GHG.K	MET	224	0.8	0.34	0					6.1	6.1
3GHG.K	TYR	225	5	1.91	0.03	12.8				9.9	9.9
3GHG.K	LEU	226	5	2.19	-0.03					24.4	24.4
3GHG.K	ILE	227			-0.04
3GHG.K	GLN	228			0.02					10.1	10.1
3GHG.K	PRO	229	12.5	7.25	-0.16					13.5	13.5
3GHG.K	ASP	230	71.9	40.7	-1.08	2.8			34.1	53.5	19.3	-1
3GHG.K	SER	231	79.4	54.42	-0.01				0.4	62.3	61.9
3GHG.K	SER	232	104.4	71.58	-0.01				18.9	63.7	44.8
3GHG.K	VAL	233	59	30.22	-0.06					51.4	51.4
3GHG.K	LYS	234	189.4	80.45	1.03	10.5		56		120.3	64.3	1
3GHG.K	PRO	235	13.6	7.9	-0.16					31.9	31.9
3GHG.K	TYR	236	15.6	5.9	0.03	11.79		8.5		25.9	17.4
3GHG.K	ARG	237	59.2	21.92	1.04	11.67		33.4		75.2	41.7	1
3GHG.K	VAL	238			-0.06
3GHG.K	TYR	239	10.9	4.13	0.03	11.22				17.8	17.8
3GHG.K	CYS	240			0.05
3GHG.K	ASP	241	8	4.52	-1.08					15.7	15.7	-1
3GHG.K	MET	242	9	3.67	0					9.7	9.7
3GHG.K	ASN	243	114	66.03	0.05					72.7	72.7
3GHG.K	THR	244	63.1	36.17	0					43.3	43.3
3GHG.K	GLU	245	75.2	36.23	-1.05	4.5				80.9	80.9	-1
3GHG.K	ASN	246	152.2	88.13	0.05				6	94.6	88.6
3GHG.K	GLY	247			0.06					2.2	2.2
3GHG.K	GLY	248			0.06
3GHG.K	TRP	249			0.02					0.3	0.3
3GHG.K	THR	250			0
3GHG.K	VAL	251	4.8	2.46	-0.06					13.1	13.1
3GHG.K	ILE	252			-0.04
3GHG.K	GLN	253			0.02
3GHG.K	ASN	254	5.2	3.01	0.05					13.6	13.6
3GHG.K	ARG	255	1.1	0.4	1.03	9.37				6.8	6.8	1
3GHG.K	GLN	256	21.1	10.55	0.02			7.2		34.5	27.3
3GHG.K	ASP	257	28.4	16.09	-1.08	1.57	0.5			34.6	34.1	-1
3GHG.K	GLY	258			0.06					2.8	2.8
3GHG.K	SER	259	3.9	2.7	-0.01					10.2	10.2
3GHG.K	VAL	260	3.6	1.85	-0.06					17.1	17.1
3GHG.K	ASP	261	10.7	6.05	-1.07	5.36			9.5	30.2	20.7	-1
3GHG.K	PHE	262	2.2	0.83	0.03					13.5	13.5
3GHG.K	GLY	263	14.2	14.12	0.06				5.5	24	18.5
3GHG.K	ARG	264	8.2	3.03	1.03	10.39		13.4		41.2	27.7	1
3GHG.K	LYS	265	104.1	44.23	1.03	10.29		48.7		76	27.2	1
3GHG.K	TRP	266	10.7	3.45	0.02					14.4	14.4
3GHG.K	ASP	267	76.6	43.38	-1.08	4.08				49.3	49.3	-1
3GHG.K	PRO	268	44.9	26.13	-0.16			2.4		41.4	39
3GHG.K	TYR	269			0.03	11.45
3GHG.K	LYS	270	44.4	18.85	1.03	10.22				33.9	33.9	1
3GHG.K	GLN	271	106.7	53.39	0.02					73.6	73.6
3GHG.K	GLY	272	11.9	11.9	0.06					13.3	13.3
3GHG.K	PHE	273	20.5	7.81	0.03					26.4	26.4
3GHG.K	GLY	274	5.4	5.35	0.06					16	16
3GHG.K	ASN	275	5	2.91	0.05					17.6	17.6
3GHG.K	VAL	276	29.9	15.28	-0.06					34.7	34.7
3GHG.K	ALA	277	1	0.74	0.05					10.1	10.1
3GHG.K	THR	278	38.3	21.97	0					36.4	36.4
3GHG.K	ASN	279	48.7	28.19	0.05					49.3	49.3
3GHG.K	THR	280	59.5	34.09	0					41.1	41.1
3GHG.K	ASP	281	111.8	63.3	-1.08	2.78				61.1	61.1	-1
3GHG.K	GLY	282	76.9	76.61	0.06					52.2	52.2
3GHG.K	LYS	283	100.7	42.78	1.03	10.29		29.7		68.7	38.9	1
3GHG.K	ASN	284	49	28.39	0.05			6.7		63.4	56.6
3GHG.K	TYR	285	48.2	18.23	0.03	10.29		0.7		48.5	47.8
3GHG.K	CYS	286			0.05
3GHG.K	GLY	287	16.5	16.47	0.06					17.5	17.5
3GHG.K	LEU	288	81.4	35.88	-0.03					46.6	46.6
3GHG.K	PRO	289	38.5	22.45	-0.16					42.3	42.3
3GHG.K	GLY	290	4.6	4.63	0.06					8.8	8.8
3GHG.K	GLU	291	1.6	0.76	-1.05	4.97				11.8	11.8	-1
3GHG.K	TYR	292			0.03	12.17				5.3	5.3
3GHG.K	TRP	293	1	0.31	0.02					1.5	1.5
3GHG.K	LEU	294	4.2	1.84	-0.03			1.9		10.9	8.9
3GHG.K	GLY	295			0.06			0.3		1.2	0.9
3GHG.K	ASN	296			0.05
3GHG.K	ASP	297	41.8	23.67	-1.08	3.18				38.4	38.4	-1
3GHG.K	LYS	298	56.7	24.07	0.96	8.55		25.3		62.6	37.3	1
3GHG.K	ILE	299			-0.04
3GHG.K	SER	300			-0.01
3GHG.K	GLN	301	35.4	17.74	0.02			1.4	4.5	44.6	38.7
3GHG.K	LEU	302			-0.03					8.3	8.3
3GHG.K	THR	303	0.4	0.26	0					2.3	2.3
3GHG.K	ARG	304	109.2	40.44	1.04	11.59		25.6		87.3	61.8	1
3GHG.K	MET	305	82.4	33.69	0		17.1		0.5	71.2	53.5
3GHG.K	GLY	306	24.8	24.68	0.06					30.8	30.8
3GHG.K	PRO	307	74.3	43.26	-0.16		19.6	0.1		57.3	37.6
3GHG.K	THR	308	1.9	1.08	0					16.6	16.6
3GHG.K	GLU	309	10.3	4.97	-1.05				12.2	15.9	3.8	-1
3GHG.K	LEU	310			-0.03
3GHG.K	LEU	311	0.9	0.38	-0.03					10.3	10.3
3GHG.K	ILE	312	0.9	0.39	-0.04
3GHG.K	GLU	313	29.9	14.41	-1.05	3.08				40.1	40.1	-1
3GHG.K	MET	314			0					3.5	3.5
3GHG.K	GLU	315	39.1	18.84	-1.05	4.8			20.1	25.9	5.8	-1
3GHG.K	ASP	316			-1.08	2.22			0.3	0.4	0.1	-1
3GHG.K	TRP	317	31.4	10.1	0.02		18.1			33.9	15.8
3GHG.K	LYS	318	134.7	57.22	1.03	9.8		29.1	10.5	92.2	52.7	1
3GHG.K	GLY	319	30.8	30.75	0.06				10.4	23	12.5
3GHG.K	ASP	320	95.1	53.85	-1.08	3.94			37.1	51.5	14.4	-1
3GHG.K	LYS	321	107.7	45.72	1.03	10.5		39.1	0.4	80.1	40.7	1
3GHG.K	VAL	322	8.3	4.24	-0.06					17.1	17.1
3GHG.K	LYS	323	80.5	34.17	1.03	10.5		53.9		83.5	29.5	1
3GHG.K	ALA	324			0.05
3GHG.K	HIS	325	5.8	2.64	0.07	6.07		7.6		28.1	20.5
3GHG.K	TYR	326			0.01	9.14
3GHG.K	GLY	327	4.5	4.46	0.06		0.2			18.3	18.1
3GHG.K	GLY	328	11.1	11.04	0.06					16.3	16.3
3GHG.K	PHE	329			0.03					4	4
3GHG.K	THR	330	39.4	22.56	0					42.8	42.8
3GHG.K	VAL	331			-0.06
3GHG.K	GLN	332	58.3	29.17	0.02					46.3	46.3
3GHG.K	ASN	333	60	34.73	0.05			13.5		48.3	34.8
3GHG.K	GLU	334	68.2	32.89	-1.05	3.77		2.7		54.5	51.7	-1
3GHG.K	ALA	335	85.8	62.48	0.05			2.3		53.8	51.5
3GHG.K	ASN	336	61.3	35.53	0.05					54.2	54.2
3GHG.K	LYS	337	66.4	28.19	1.03	10.36		37.5		54.7	17.2	1
3GHG.K	TYR	338			0.03
3GHG.K	GLN	339	52.6	26.32	0.02					46.7	46.7
3GHG.K	ILE	340	5.1	2.31	-0.04
3GHG.K	SER	341	43.3	29.69	-0.01					40	40
3GHG.K	VAL	342	1.7	0.85	-0.06					1	1
3GHG.K	ASN	343	69.8	40.43	0.05					45.1	45.1
3GHG.K	LYS	344	134.1	56.94	1.03	10.43	17.3	38.5		100.7	45	1
3GHG.K	TYR	345	56.7	21.46	0.03	10.57			0.1	47.5	47.4
3GHG.K	ARG	346	154.1	57.08	1.04	12.08		43.5		119.4	75.9	1
3GHG.K	GLY	347	30.8	30.72	0.06			3.3		28.7	25.4
3GHG.K	THR	348	98.8	56.64	0			1.4		67	65.6
3GHG.K	ALA	349			0.05					3.3	3.3
3GHG.K	GLY	350	17.9	17.84	0.06					14.7	14.7
3GHG.K	ASN	351	12.1	6.98	0.05				2.7	19.5	16.8
3GHG.K	ALA	352			0.05
3GHG.K	LEU	353	0.9	0.38	-0.03
3GHG.K	MET	354	37.7	15.42	0				6.6	34.8	28.2
3GHG.K	ASP	355	82.9	46.94	-1.08	4.31			26.7	52.6	25.9	-1
3GHG.K	GLY	356	0.4	0.44	0.06					2.3	2.3
3GHG.K	ALA	357			0.05
3GHG.K	SER	358	56.4	38.68	-0.01					44.5	44.5
3GHG.K	GLN	359	102.2	51.11	0.02					74	74
3GHG.K	LEU	360	65.2	28.72	-0.03					43.2	43.2
3GHG.K	MET	361	160.2	65.5	0		57			96.9	39.9
3GHG.K	GLY	362	59.3	59.12	0.06					34.7	34.7
3GHG.K	GLU	363	141.1	68.01	-1.05	4.5			33.6	81	47.3	-1
3GHG.K	ASN	364	69.4	40.2	0.05				8.1	46.8	38.7
3GHG.K	ARG	365	69.2	25.63	1.04	11.87				56.3	56.3	1
3GHG.K	THR	366	92.3	52.89	0					57.1	57.1
3GHG.K	MET	367	47.5	19.43	0				1.3	50.2	48.9
3GHG.K	THR	368	6.2	3.58	0					8.9	8.9
3GHG.K	ILE	369	32.8	14.77	-0.04				0.5	33.3	32.8
3GHG.K	HIS	370			0.03	1.82
3GHG.K	ASN	371	43.4	25.13	0.05					40	40
3GHG.K	GLY	372	37.1	37.03	0.06					32.5	32.5
3GHG.K	MET	373	32.7	13.37	0					27.3	27.3
3GHG.K	PHE	374	71.8	27.38	0.03					50.9	50.9
3GHG.K	PHE	375			0.03
3GHG.K	SER	376			-0.01
3GHG.K	THR	377			0
3GHG.K	TYR	378	75.4	28.51	0.03	10.95		2.4		68.8	66.4
3GHG.K	ASP	379	71.1	40.25	-1.08	2.46		0.4		51	50.6	-1
3GHG.K	ARG	380	84.3	31.21	1.04	11.8		15.8		67.1	51.3	1
3GHG.K	ASP	381	64.7	36.64	-1.08	2.92				49.1	49.1	-1
3GHG.K	ASN	382	19.6	11.36	0.05					29.7	29.7
3GHG.K	ASP	383	8.4	4.76	-1.08	3.42				11.4	11.4	-1
3GHG.K	GLY	384	18.9	18.84	0.06					19.2	19.2
3GHG.K	TRP	385	48.1	15.48	0.02			11	6.4	50	32.6
3GHG.K	LEU	386	171.9	75.76	-0.03		54	0.2		99.8	45.7
3GHG.K	THR	387	73.5	42.15	0			0.1		61.1	61
3GHG.K	SER	388	121.1	83.03	-0.01					70.3	70.3
3GHG.K	ASP	389	48.1	27.24	-1.08	3.61				37.5	37.5	-1
3GHG.K	PRO	390	99.1	57.7	-0.16					59	59
3GHG.K	ARG	391	153.2	56.73	1.04	12.22		35.8	0.8	112	75.5	1
3GHG.K	LYS	392	72.5	30.78	1.03	10.43		40.4		56.3	16	1
3GHG.K	GLN	393	27.4	13.69	0.02					25.6	25.6
3GHG.K	CYS	394			0.05
3GHG.K	SER	395			-0.01					1.3	1.3
3GHG.K	LYS	396	50.4	21.4	1.03	9.8				59.5	59.5	1
3GHG.K	GLU	397	12.9	6.2	-1.04	5.41			18.5	27.9	9.4	-1
3GHG.K	ASP	398			-1.08	4.32			5.6	5.6		-1
3GHG.K	GLY	399	8	8.01	0.06					16.6	16.6
3GHG.K	GLY	400			0.06					0.1	0.1
3GHG.K	GLY	401			0.06
3GHG.K	TRP	402	2	0.64	0.02
3GHG.K	TRP	403			0.02
3GHG.K	TYR	404			0.03
3GHG.K	ASN	405	20.2	11.73	0.05					19.2	19.2
3GHG.K	ARG	406	92.8	34.37	1.04	12.08		31.2		86.5	55.4	1
3GHG.K	CYS	407	19.6	12.56	0.05				6.1	22.3	16.2
3GHG.K	HIS	408	1.4	0.65	1.09	8.87			6.8	11.5	4.7
3GHG.K	ALA	409			0.05
3GHG.K	ALA	410			0.05
3GHG.K	ASN	411			0.05
3GHG.K	PRO	412			-0.16
3GHG.K	ASN	413			0.05					1.2	1.2
3GHG.K	GLY	414			0.06					1.1	1.1
3GHG.K	ARG	415	18.2	6.73	1.04	12.54		8.9		61.1	52.2	1
3GHG.K	TYR	416	2.8	1.06	0.03	12.43	0.2			13	12.8
3GHG.K	TYR	417	0.4	0.15	0.03	13.78	4.2			16.9	12.8
3GHG.K	TRP	418	136.5	43.89	0.02		48.6		0.5	97.9	48.8
3GHG.K	GLY	419	28	27.95	0.06					27	27
3GHG.K	GLY	420			0.06
3GHG.K	GLN	421	113.9	56.98	0.02					86.9	86.9
3GHG.K	TYR	422	1.7	0.63	0.03		3.3			14.6	11.4
3GHG.K	THR	423	56	32.08	0				2.6	47.5	44.9
3GHG.K	TRP	424	179.5	57.71	0.02		82.4			121	38.5
3GHG.K	ASP	425	15.7	8.91	-1.08		1.2		10.8	21.7	9.7	-1
3GHG.K	MET	426	3.2	1.32	0		8.2			16.5	8.3
3GHG.K	ALA	427			0.05
3GHG.K	LYS	428	49.5	21.03	-0.01	5.69		33.5		67.5	34	1
3GHG.K	HIS	429	83	37.73	0.03	4.64		7.2	5	76	63.9
3GHG.K	GLY	430	20.5	20.41	0.06					17.9	17.9
3GHG.K	THR	431	42.3	24.25	0				13.3	42.6	29.3
3GHG.K	ASP	432	21.2	11.99	-1.08				16	24.9	8.9	-1
3GHG.K	ASP	433			-1.08	4.15				4.5	4.5	-1
3GHG.K	GLY	434			0.06
3GHG.K	VAL	435			-0.06
3GHG.K	VAL	436			-0.06
3GHG.K	TRP	437			0.02
3GHG.K	MET	438	13.9	5.67	0				3.6	25.8	22.2
3GHG.K	ASN	439	27.1	15.68	0.05					23.6	23.6
3GHG.K	TRP	440	57.4	18.45	0.02					52.2	52.2
3GHG.K	LYS	441	70.5	29.93	1.03	10.22		23.4		60.9	37.5	1
3GHG.K	GLY	442	12.6	12.52	0.06					17	17
3GHG.K	SER	443	14.1	9.68	-0.01				3.8	20.5	16.7
3GHG.K	TRP	444	101.8	32.74	0.02		34.2			73.1	38.9
3GHG.K	TYR	445	5.6	2.12	0.03	10.53		1.4		14.4	13
3GHG.K	SER	446			-0.01
3GHG.K	MET	447			0
3GHG.K	ARG	448	63.4	23.48	1.04	11.59	0.9	9.2		57.3	47.2	1
3GHG.K	LYS	449	67.7	28.76	1.03	9.94		24.7	0.5	58.2	33.1	1
3GHG.K	MET	450			0					2.3	2.3
3GHG.K	SER	451	11.2	7.68	-0.01					21.9	21.9
3GHG.K	MET	452	0.8	0.33	0
3GHG.K	LYS	453	13.8	5.87	1.03	12.94				16.2	16.2	1
3GHG.K	ILE	454			-0.04					3.7	3.7
3GHG.K	ARG	455	39.7	14.7	1.04				1.9	46.9	45	1
3GHG.K	PRO	456	16	9.33	-0.16		13.7		5.2	42.7	23.8
3GHG.K	PHE	457	89.1	34	0.03		43.6	3	10.6	70.8	13.6
3GHG.K	PHE	458	225	85.86	0		57.3		9.4	127.4	60.7
3GHG.K	CA	501								9.4	9.4	2
3GHG.J	ALA	27	96.9	70.6	1.03	7.72		40.6		64.3	23.7	1
3GHG.J	CYS	28	57.2	36.64	0.05		13.4	0.4		46.6	32.8
3GHG.J	LYS	29	156.5	66.45	1.03	10.5	0.1	79.4	3.2	113.2	30.5	1
3GHG.J	ASP	30	79.5	44.99	-1.08	4.48		0.4	36.4	73.5	36.6	-1
3GHG.J	SER	31	68.2	46.79	-0.01			0.3	10.7	62.2	51.3
3GHG.J	ASP	32	90.3	51.1	-1.08	3.58			46.1	72.4	26.3	-1
3GHG.J	TRP	33	43.6	14.02	0.02		20.2	2.4	6.7	59.3	30.1
3GHG.J	PRO	34	100.6	58.61	-0.16					61.2	61.2
3GHG.J	PHE	35	172.7	65.91	0.03		69.2			107.7	38.5
3GHG.J	CYS	36	20.7	13.26	0.05					16	16
3GHG.J	SER	37	65.3	44.8	-0.01				7.1	48.9	41.8
3GHG.J	ASP	38	112.2	63.5	-1.08	4.56			39.7	73.3	33.6	-1
3GHG.J	GLU	39	111.9	53.96	-1.05	3.06			46.6	71.8	25.2	-1
3GHG.J	ASP	40	39.8	22.56	-1.08	3.49			26.4	32.3	6	-1
3GHG.J	TRP	41	57.7	18.54	0.02		41.5		1.2	63.8	21
3GHG.J	ASN	42	88	50.97	0.05					64.7	64.7
3GHG.J	TYR	43	116.1	43.95	0.03	10			0.1	84.2	84.1
3GHG.J	LYS	44	26.8	11.37	1.02	9.38		21.4		38.3	16.9	1
3GHG.J	CYS	45			0.05					5.4	5.4
3GHG.J	PRO	46			-0.16		3.4			7.2	3.9
3GHG.J	SER	47	22.4	15.36	-0.01		1.7			37.7	36.1
3GHG.J	GLY	48	5.1	5.07	0.06					12.2	12.2
3GHG.J	CYS	49	1.2	0.77	0.05		3.1			7.2	4.1
3GHG.J	ARG	50	38	14.08	1.04	12.06	1.3	17.8		56.1	37	1
3GHG.J	MET	51	1.2	0.49	0		10.3			11	0.7
3GHG.J	LYS	52	46.2	19.6	1.03	10.06		36	0.2	49.8	13.7	1
3GHG.J	GLY	53	1.2	1.2	0.06				4.7	7.5	2.8
3GHG.J	LEU	54	28.7	12.66	-0.03		29.5		4.7	52.9	18.7
3GHG.J	ILE	55			-0.04
3GHG.J	ASP	56	62.5	35.38	-1.08	3.83			23.5	48.7	25.2	-1
3GHG.J	GLU	57	76.8	37.03	-1.05	4.71			52.7	66.5	13.7	-1
3GHG.J	VAL	58	20	10.25	-0.06		10.8		3.5	25.5	11.1
3GHG.J	ASN	59	5	2.88	0.05					9.2	9.2
3GHG.J	GLN	60	113.4	56.75	0.02				10.8	75.3	64.5
3GHG.J	ASP	61	58.5	33.09	-1.08	4.03			35	50.4	15.3	-1
3GHG.J	PHE	62	8.4	3.19	0.03		8.2			18.8	10.6
3GHG.J	THR	63	46.3	26.54	0					40.8	40.8
3GHG.J	ASN	64	63.6	36.83	0.05			9.4	1.2	51.1	40.5
3GHG.J	ARG	65	55.3	20.48	1.04	11.94		4	0.5	62.5	57.9	1
3GHG.J	ILE	66	1.5	0.66	-0.04					8.9	8.9
3GHG.J	ASN	67	74.1	42.91	0.05			5.5		50.5	45
3GHG.J	LYS	68	136.6	57.99	1.03	10.5		53.1		97.3	44.2	1
3GHG.J	LEU	69	10.2	4.51	-0.03					30.4	30.4
3GHG.J	LYS	70	57.7	24.5	1.03	10.15	3.2	35.6		44	5.2	1
3GHG.J	ASN	71	71.4	41.33	0.05					47.2	47.2
3GHG.J	SER	72	29.1	19.94	-0.01					32.2	32.2
3GHG.J	LEU	73	6.5	2.86	-0.03		6.5			19.2	12.7
3GHG.J	PHE	74	112.4	42.9	0.03		44.1	0.9		81.9	36.9
3GHG.J	GLU	75	84.4	40.71	-1.05	4.39			32.3	58.9	26.6	-1
3GHG.J	TYR	76	80.9	30.61	0.03	12.91			7.3	80.5	73.2
3GHG.J	GLN	77	80	40.05	0.02					77.7	77.7
3GHG.J	LYS	78	124.6	52.92	1.03	10.43			1.8	96.2	94.5	1
3GHG.J	ASN	79	50.8	29.41	0.05			12.1	3.2	53.7	38.3
3GHG.J	ASN	80	45.8	26.5	0.05					63	63
3GHG.J	LYS	81	157.1	66.72	1.03	10.5		43.7		97.6	53.9	1
3GHG.J	ASP	82	77.7	43.97	-1.08	4.05				55.9	55.9	-1
3GHG.J	SER	83	27.4	18.78	-0.01					39	39
3GHG.J	HIS	84	122	55.47	0.12	6.43				85.2	85.2
3GHG.J	SER	85	55.2	37.85	-0.01					39.1	39.1
3GHG.J	LEU	86	84.4	37.2	-0.03		44.3			63	18.7
3GHG.J	THR	87	19.5	11.2	0		11.9			42.1	30.2
3GHG.J	THR	88	65.1	37.31	0					54.4	54.4
3GHG.J	ASN	89	70.6	40.9	0.05				12.1	53.2	41.1
3GHG.J	ILE	90	23.1	10.39	-0.04		26			46.8	20.9
3GHG.J	MET	91	91.7	37.5	0		46.3			85.1	38.7
3GHG.J	GLU	92	99.7	48.08	-1.05	4.71			40.9	71	30.2	-1
3GHG.J	ILE	93	57.1	25.68	-0.04		18.7		15.4	64.8	30.7
3GHG.J	LEU	94	36.8	16.22	-0.03		35			46.1	11.1
3GHG.J	ARG	95	177.6	65.77	1.04	12.5		48.7		121.3	72.6	1
3GHG.J	GLY	96	39.3	39.2	0.06					26.8	26.8
3GHG.J	ASP	97	63.2	35.8	-1.08	3.8			42.1	57.1	15	-1
3GHG.J	PHE	98	46.3	17.69	0.03		42.7			73.5	30.8
3GHG.J	SER	99	62.6	42.91	-0.01					52.4	52.4
3GHG.J	SER	100	60.2	41.27	-0.01				0.6	45.3	44.8
3GHG.J	ALA	101	26.7	19.45	0.05				0.3	23.7	23.5
3GHG.J	ASN	102	93.5	54.14	0.05					64.8	64.8
3GHG.J	ASN	103	99.6	57.71	0.05					67.3	67.3
3GHG.J	ARG	104	103.1	38.17	1.04	12.01				93.8	93.8	1
3GHG.J	ASP	105	50.9	28.83	-1.08	4.24			34.6	54.2	19.7	-1
3GHG.J	ASN	106	90.7	52.55	0.05			0.1		63.5	63.4
3GHG.J	THR	107	43.8	25.1	0			4.7		38.5	33.8
3GHG.J	TYR	108	11.8	4.46	0.02	9.7			4.1	32.8	28.7
3GHG.J	ASN	109	70.4	40.8	0.05			4.8	0.6	64.3	59
3GHG.J	ARG	110	150	55.54	1.04	12.43		51.9	0.7	102.8	50.3	1
3GHG.J	VAL	111	10.5	5.37	-0.06			3.4		25.8	22.4
3GHG.J	SER	112	20.9	14.32	-0.01			7.4		31.3	23.9
3GHG.J	GLU	113	117.9	56.84	-1.05	4.57		0.6	39.7	79.8	39.5	-1
3GHG.J	ASP	114	48.8	27.6	-1.08	3.75			1.3	41.7	40.4	-1
3GHG.J	LEU	115	11.8	5.21	-0.03		3			34	31
3GHG.J	ARG	116	92.4	34.23	1.04	11.69	0.3	29.4		104.6	74.9	1
3GHG.J	SER	117	57.7	39.57	-0.01					41.7	41.7
3GHG.J	ARG	118	113.8	42.16	1.04	12.29				95.7	95.7	1
3GHG.J	ILE	119	13.8	6.22	-0.04		37.8			55.9	18.1
3GHG.J	GLU	120	99.6	48.01	-1.05	4.5			37.9	82.3	44.3	-1
3GHG.J	VAL	121	91.2	46.66	-0.06					72.7	72.7
3GHG.J	LEU	122	7.7	3.41	-0.03		6.5			32.1	25.6
3GHG.J	LYS	123	29.4	12.5	1	8.86	29.7			58.3	28.6	1
3GHG.J	ARG	124	174.7	64.67	1.04	12.43		42	0.7	135.5	92.7	1
3GHG.J	LYS	125	65.3	27.74	1.03	10.29	0.2	35.7	0.2	66.5	30.4	1
3GHG.J	VAL	126	6.2	3.2	-0.06		9.6			29	19.4
3GHG.J	ILE	127	71.7	32.26	-0.04		49.7			68.9	19.2
3GHG.J	GLU	128	89.6	43.17	-1.05	4.57			34.2	57.8	23.6	-1
3GHG.J	LYS	129	33.9	14.4	1.03	10.29	4.4	18.8		52.6	29.5	1
3GHG.J	VAL	130	0.9	0.45	-0.06		2			15.3	13.3
3GHG.J	GLN	131	74.8	37.45	0.02		0.5			59.6	59.1
3GHG.J	HIS	132	67.6	30.75	0.26	6.88				50	50
3GHG.J	ILE	133	5.3	2.37	-0.04		17.4			30.4	12.9
3GHG.J	GLN	134	38.2	19.11	0.02		1.2			59.9	58.7
3GHG.J	LEU	135	103.5	45.62	-0.03		56.2			85	28.8
3GHG.J	LEU	136	3.9	1.72	-0.03		10.4			37.2	26.8
3GHG.J	GLN	137	6.6	3.28	0.02					17.7	17.7
3GHG.J	LYS	138	100.3	42.58	1.03	10.43	1.4	49.9		80.3	29.1	1
3GHG.J	ASN	139	44.5	25.78	0.05					41.2	41.2
3GHG.J	VAL	140			-0.06					9.8	9.8
3GHG.J	ARG	141	74.3	27.52	1.04	12.01		27.2		68.8	41.6	1
3GHG.J	ALA	142	51.5	37.54	0.05			2.4	4.4	44.7	37.9
3GHG.J	GLN	143	9.5	4.75	0.02				0.3	18.7	18.4
3GHG.J	LEU	144			-0.03
3GHG.J	VAL	145	27.3	14	-0.06		15.8			43.7	27.9
3GHG.J	ASP	146	44.9	25.42	-1.08	4.61			27.7	36.1	8.4	-1
3GHG.J	MET	147			0
3GHG.J	LYS	148	0.4	0.17	1.03	11.45			0.1	15	14.8	1
3GHG.J	ARG	149	31	11.47	1.04	11.21			0.5	43.8	43.3	1
3GHG.J	LEU	150	3.5	1.53	-0.03				2.6	10.7	8.2
3GHG.J	GLU	151	3.4	1.65	-1.05	3.27				13.8	13.8	-1
3GHG.J	VAL	152	5.8	2.99	-0.06		11.2		0.2	20.2	8.8
3GHG.J	ASP	153	0.8	0.47	-1.08					6.1	6.1	-1
3GHG.J	ILE	154			-0.04					3.9	3.9
3GHG.J	ASP	155	7.9	4.49	-1.08	1.18			9.9	12	2.1	-1
3GHG.J	ILE	156	3.9	1.77	-0.04					14.4	14.4
3GHG.J	LYS	157	10.7	4.55	1.03	13.67		15.6	0.8	34.8	18.4	1
3GHG.J	ILE	158			-0.04					3.2	3.2
3GHG.J	ARG	159	19.9	7.35	1.04	12.3	0.7	11.3	0.4	39	26.6	1
3GHG.J	SER	160			-0.01					7.8	7.8
3GHG.J	CYS	161			0.05
3GHG.J	ARG	162	115.6	42.81	1.04	13.66		35.8		91.2	55.4	1
3GHG.J	GLY	163	5.8	5.83	0.06					9.7	9.7
3GHG.J	SER	164	1	0.69	-0.01					15.5	15.5
3GHG.J	CYS	165	1.2	0.77	0.05					4.8	4.8
3GHG.J	SER	166	61.9	42.42	-0.01					38.4	38.4
3GHG.J	ARG	167	136.6	50.57	1.04	12.08		37.4		95	57.6	1
3GHG.J	ALA	168	19.8	14.41	0.05					28.7	28.7
3GHG.J	LEU	169	35.5	15.66	-0.03			2.7		34.4	31.7
3GHG.J	ALA	170	106.2	77.34	0.05			2.9		65.5	62.6
3GHG.J	ARG	171	33.8	12.53	1.04	12.1			3	60.6	57.6	1
3GHG.J	GLU	172	150.1	72.34	-1.05	4.61			44.1	106.8	62.7	-1
3GHG.J	VAL	173	26.5	13.56	-0.06		1.3		0.2	43.8	42.3
3GHG.J	ASP	174	61	34.54	-1.08	3.78			20.6	53.8	33.2	-1
3GHG.J	LEU	175	67.6	29.8	-0.03		45.7		0.5	71.2	25
3GHG.J	LYS	176	171.5	72.83	1.03	10.5	6.2	45.6	4.6	106.4	50	1
3GHG.J	ASP	177	42.7	24.18	-1.08	3.43			35.1	40.1	5	-1
3GHG.J	TYR	178	4.5	1.7	0.03					1.2	1.2
3GHG.J	GLU	179	63	30.38	-1.05	4.5			41.7	61.1	19.4	-1
3GHG.J	ASP	180	74.3	42.04	-1.08	3.94			40.8	55.2	14.4	-1
3GHG.J	GLN	181	16.7	8.33	0.02				1.1	20.4	19.3
3GHG.J	GLN	182	20.2	10.1	0.02					33.7	33.7
3GHG.J	LYS	183	119.8	50.86	1.03	10.15		31.7	0.3	96.1	64	1
3GHG.J	GLN	184	66.2	33.11	0.02			2.2		50.7	48.5
3GHG.J	LEU	185			-0.03
3GHG.J	GLU	186	69.5	33.52	-1.05	4.23				55.1	55.1	-1
3GHG.J	GLN	187	122.3	61.18	0.02			6.7		88.5	81.8
3GHG.J	VAL	188	30.5	15.63	-0.06			1.8		39.4	37.6
3GHG.J	ILE	189	25.8	11.63	-0.04					34.6	34.6
3GHG.J	ALA	190	87.3	63.61	0.05					60.5	60.5
3GHG.J	LYS	191	140	59.47	1.03	10.43		46.5		111	64.6	1
3GHG.J	ASP	192	36	20.39	-1.08	3.48		3.1		61	57.9	-1
3GHG.J	LEU	193	95.9	42.26	-0.03		53		4.9	86.4	28.5
3GHG.J	LEU	194	14.4	6.35	-0.03		20.5		6.9	43.8	16.3
3GHG.J	PRO	195	85.1	49.57	-0.16		14.2		10.3	70	45.5
3GHG.J	SER	196	55.3	37.95	-0.01			0.4		44.2	43.7
3GHG.J	ARG	197	104.2	38.59	1.04	12.15	1	48.2		91.7	42.5	1
3GHG.J	ASP	198	124.1	70.23	-1.08	2.33			30.9	96.1	65.3	-1
3GHG.J	ARG	199	125.4	46.45	1.04	12.29		47.3	0.6	106.8	58.9	1
3GHG.J	GLN	200	28.1	14.04	0.02			7.9		65.7	57.8
3GHG.J	HIS	201	144.4	65.66	0.09	6.24	9.2	4.1		107.3	94
3GHG.J	LEU	202	157.2	69.28	-0.03		60.2	5.2		93.9	28.5
3GHG.J	PRO	203	116	67.55	-0.16			1.5		82.3	80.8
3GHG.J	LEU	204	127	55.97	-0.03		48.3	1.6		100	50
3GHG.J	ILE	205	38.9	17.5	-0.04			0.7		50.4	49.8
3GHG.J	LYS	206	145.7	61.87	1.03	10.5	17.7	57.8		97.4	21.9	1
3GHG.J	MET	207	48.3	19.74	0		13.5			40.1	26.6
3GHG.J	LYS	208	138.2	58.7	1.03	10.5	9	52		108.7	47.7	1
3GHG.J	PRO	209	59.6	34.72	-0.16		15.8	0.3	0.8	50.7	33.8
3GHG.J	VAL	210	37.2	19.05	-0.06			3.6	8.9	37.3	24.7
3GHG.J	PRO	211	80.1	46.67	-0.16		8.4		14.6	60.2	37.2
3GHG.J	ASP	212	170.7	96.64	-0.99	4.01			52.2	95.2	43	-1
3GHG.I	VAL	2	189.2	96.81	0.95	7.86	32.4	42.4		99.7	24.8	1
3GHG.I	ALA	3	28.9	21.04	0.05			7.5		47.4	39.9
3GHG.I	THR	4	99.7	57.13	0					60.7	60.7
3GHG.I	ARG	5	116.5	43.12	1.04	11.8				83.5	83.5	1
3GHG.I	ASP	6	142.9	80.88	-1.08	3.7			38.5	82.8	44.3	-1
3GHG.I	ASN	7	66.5	38.51	0.05					51.6	51.6
3GHG.I	CYS	8	1	0.63	0.05					3.8	3.8
3GHG.I	CYS	9	63.2	40.49	0.05					49.6	49.6
3GHG.I	ILE	10	41.8	18.81	-0.04		12.3			64.5	52.3
3GHG.I	LEU	11	38.7	17.04	-0.03				7.2	53.8	46.6
3GHG.I	ASP	12	18.6	10.53	-1.08	2.81			14.4	30.2	15.8	-1
3GHG.I	GLU	13	149.7	72.16	-1.05	3.93			36.6	85.4	48.9	-1
3GHG.I	ARG	14	152.9	56.6	1.04	12.5	0.3	46.3	10	108.5	52	1
3GHG.I	PHE	15	15.2	5.8	0.03		19.7		0.5	27.8	7.7
3GHG.I	GLY	16	29.2	29.14	0.06					24.6	24.6
3GHG.I	SER	17	79.7	54.66	-0.01					67.7	67.7
3GHG.I	TYR	18	6.4	2.41	0.02	9.9				28.4	28.4
3GHG.I	CYS	19	8.6	5.52	0.05		6.7			17	10.3
3GHG.I	PRO	20	1	0.59	-0.16		0.2			2.7	2.5
3GHG.I	THR	21	14	8.04	0					32.3	32.3
3GHG.I	THR	22	13.8	7.91	0					19.6	19.6
3GHG.I	CYS	23	0.4	0.24	0.05				0	4.7	4.7
3GHG.I	GLY	24	4.4	4.42	0.06				6.3	17.4	11.1
3GHG.I	ILE	25			-0.04
3GHG.I	ALA	26	4.3	3.15	0.05		4.3			15.6	11.3
3GHG.I	ASP	27	51.7	29.28	-1.08	4.83	0.3		21.1	46.7	25.4	-1
3GHG.I	PHE	28	7.4	2.82	0.03				2.2	25.6	23.4
3GHG.I	LEU	29	9.9	4.37	-0.03		11.6			21	9.3
3GHG.I	SER	30	69	47.33	-0.01					51.4	51.4
3GHG.I	THR	31	89.9	51.52	0				0.7	66.8	66.1
3GHG.I	TYR	32	5.1	1.93	0.03	11.16		1.4		17	15.6
3GHG.I	GLN	33	39.8	19.9	0.02		0.3		5.7	38.8	32.8
3GHG.I	THR	34	71	40.71	0					47.6	47.6
3GHG.I	LYS	35	138.2	58.67	1.03	10.36		40.8		101.8	61	1
3GHG.I	VAL	36	4.8	2.46	-0.06					11.6	11.6
3GHG.I	ASP	37	36.1	20.44	-1.08	3.28			28.6	31.6	3	-1
3GHG.I	LYS	38	131.2	55.7	1.03	10.5		42		91.9	49.9	1
3GHG.I	ASP	39	35.7	20.21	-1.08	3.8			27.8	40.8	12.9	-1
3GHG.I	LEU	40			-0.03
3GHG.I	GLN	41	63.6	31.8	0.02			6	11.9	59.1	41.3
3GHG.I	SER	42	57.1	39.18	-0.01				7.8	45.2	37.3
3GHG.I	LEU	43	3.2	1.41	-0.03				7.9	10.5	2.5
3GHG.I	GLU	44	37.1	17.88	-1.05	3.63			17.1	35	17.9	-1
3GHG.I	ASP	45	63.5	35.97	-1.08	4.08			38.1	48.9	10.9	-1
3GHG.I	ILE	46	78	35.11	-0.04					63.4	63.4
3GHG.I	LEU	47	11.4	5	-0.03					23.1	23.1
3GHG.I	HIS	48	83.4	37.94	0.39	7.16			11.5	65.9	54.5
3GHG.I	GLN	49	114.6	57.36	0.02			5.8	8	74.1	60.3
3GHG.I	VAL	50	6.2	3.2	-0.06					18.2	18.2
3GHG.I	GLU	51	49	23.61	-1.05	4.27			31.4	41.7	10.2	-1
3GHG.I	ASN	52	67.5	39.07	0.05			0.4	17.6	50.6	32.7
3GHG.I	LYS	53	54.3	23.04	1.03	10.15		29.7		52.9	23.2	1
3GHG.I	THR	54	1.8	1.05	0			0.2	1.1	14.2	13
3GHG.I	SER	55	25.5	17.49	-0.01			3.5	2.4	33	27.1
3GHG.I	GLU	56	78.1	37.64	-1.05	4.57			37.7	68.4	30.7	-1
3GHG.I	VAL	57	6.6	3.36	-0.06		11.2			23.6	12.4
3GHG.I	LYS	58	108.1	45.9	1.03	10.5		50.3		85	34.7	1
3GHG.I	GLN	59	92.2	46.11	0.02			0.5	11	77.9	66.5
3GHG.I	LEU	60	38	16.74	-0.03		16.9			43.7	26.8
3GHG.I	ILE	61	55.7	25.08	-0.04		46.1			66.3	20.2
3GHG.I	LYS	62	144.6	61.42	1.03	10.5		47		97.6	50.6	1
3GHG.I	ALA	63	54.8	39.9	0.05					47.2	47.2
3GHG.I	ILE	64	35	15.77	-0.04		28.8			50.6	21.8
3GHG.I	GLN	65	126.8	63.46	0.02		0.3			81.1	80.9
3GHG.I	LEU	66	159.4	70.27	-0.03		67.6			99.9	32.3
3GHG.I	THR	67	72.7	41.69	0					60.2	60.2
3GHG.I	TYR	68	103.8	39.29	0.03	10.38	61.4			100.8	39.4
3GHG.I	ASN	69	94.5	54.71	0.05				14.2	64.8	50.5
3GHG.I	PRO	70	94.2	54.84	-0.16				3.8	60.4	56.6
3GHG.I	ASP	71	58.5	33.14	-1.08	3.21			44.2	58.1	13.9	-1
3GHG.I	GLU	72	109.5	52.77	-1.05	4.57			46.4	74.2	27.8	-1
3GHG.I	SER	73	82.1	56.33	-0.01				7.3	48.1	40.7
3GHG.I	SER	74	75.2	51.57	-0.01			0.8	9.7	72.7	62.2
3GHG.I	LYS	75	164.1	69.67	1.03	10.5		54	2.7	109.6	53	1
3GHG.I	PRO	76	117.6	68.51	-0.16			2.1	13.9	77.2	61.2
3GHG.I	ASN	77	50.2	29.07	0.05			2.9	11.2	61.3	47.2
3GHG.I	MET	78	43.6	17.84	0		1.4			80.7	79.3
3GHG.I	ILE	79	16.3	7.34	-0.04		2.5			35.2	32.7
3GHG.I	ASP	80	54.2	30.67	-1.08	3.94			34.3	51.6	17.2	-1
3GHG.I	ALA	81	31.9	23.26	0.05					28.8	28.8
3GHG.I	ALA	82			0.05		0.9			9	8
3GHG.I	THR	83	34.9	20.01	0		1.3		1.5	39.8	36.9
3GHG.I	LEU	84	88.3	38.89	-0.03			1.2	0.1	61.5	60.2
3GHG.I	LYS	85	21.3	9.05	1.03	10.08		0.3		70.9	70.6	1
3GHG.I	SER	86	3.9	2.67	-0.01					15.5	15.5
3GHG.I	ARG	87	150.6	55.75	1.04	12.36		40.6		105.8	65.2	1
3GHG.I	LYS	88	120.6	51.21	1.03	10.5		45.4		96.4	51	1
3GHG.I	MET	89	3	1.23	0					16.6	16.6
3GHG.I	LEU	90	57.4	25.29	-0.03		20.4			56.3	35.9
3GHG.I	GLU	91	117.6	56.68	-1.05	4.5			43.8	81.6	37.8	-1
3GHG.I	GLU	92	62.3	30.01	-1.05	3.85			40.1	49.8	9.7	-1
3GHG.I	ILE	93	7.1	3.21	-0.04				1.9	24.4	22.6
3GHG.I	MET	94	119.2	48.75	0		42.7		13.7	89.8	33.3
3GHG.I	LYS	95	140.9	59.85	1.03	10.5		46		102	56	1
3GHG.I	TYR	96			0.03				5.8	17.2	11.4
3GHG.I	GLU	97	81.2	39.13	-1.05	4.78	0.6		36.8	61.9	24.4	-1
3GHG.I	ALA	98	56.4	41.07	0.05					38.3	38.3
3GHG.I	SER	99	20.6	14.13	-0.01					26.6	26.6
3GHG.I	ILE	100	2.2	0.99	-0.04					10.7	10.7
3GHG.I	LEU	101	123.3	54.34	-0.03		48.4	0.4		91.2	42.4
3GHG.I	THR	102	84.6	48.49	0					58	58
3GHG.I	HIS	103	31.6	14.35	0.15	6.55				33.1	33.1
3GHG.I	ASP	104	28.1	15.91	-1.08	4.29				34.3	34.3	-1
3GHG.I	SER	105	64.7	44.37	-0.01					51.6	51.6
3GHG.I	SER	106	23.1	15.86	-0.01					22.5	22.5
3GHG.I	ILE	107	6.4	2.9	-0.04		1.3			28	26.8
3GHG.I	ARG	108	155.6	57.62	1.04	12.43		37.7	1.2	104.3	65.3	1
3GHG.I	TYR	109	128.7	48.69	0.03	10.52	41.7			92.9	51.2
3GHG.I	LEU	110	1.1	0.5	-0.03		3.6			9.7	6.1
3GHG.I	GLN	111	54.5	27.29	0.02		0.3		6	57.8	51.4
3GHG.I	GLU	112	103	49.67	-1.05	4.71			39	72	33	-1
3GHG.I	ILE	113	18.7	8.39	-0.04		14.9			32	17
3GHG.I	TYR	114	46.9	17.73	0.03	10.07	8.8			41.9	33.1
3GHG.I	ASN	115	89.5	51.84	0.05					65.3	65.3
3GHG.I	SER	116	25.9	17.75	-0.01					23.1	23.1
3GHG.I	ASN	117			0.05					6	6
3GHG.I	ASN	118	53.1	30.75	0.05					40	40
3GHG.I	GLN	119	102.4	51.24	0.02					69.8	69.8
3GHG.I	LYS	120	47.6	20.23	1.03	9.73		14.5	0.5	52.8	37.7	1
3GHG.I	ILE	121	4.2	1.88	-0.04					19.5	19.5
3GHG.I	VAL	122	98.7	50.54	-0.06					69.6	69.6
3GHG.I	ASN	123	75.8	43.9	0.05					58.5	58.5
3GHG.I	LEU	124			-0.03					2.1	2.1
3GHG.I	LYS	125	75.5	32.07	1.03	11.7				83.8	83.8	1
3GHG.I	GLU	126	99.7	48.09	-1.05	4.5			32.8	72.5	39.6	-1
3GHG.I	LYS	127	49.7	21.12	1.03	9.87				48.1	48.1	1
3GHG.I	VAL	128	2.3	1.2	-0.06			0.2		8.3	8.1
3GHG.I	ALA	129	44.5	32.38	0.05				2	35.5	33.5
3GHG.I	GLN	130	101.4	50.74	0.02				3.7	71.9	68.2
3GHG.I	LEU	131			-0.03
3GHG.I	GLU	132	56.2	27.08	-1.05	1.92			34.2	41.1	6.9	-1
3GHG.I	ALA	133	57.9	42.21	0.05				8.6	43.8	35.2
3GHG.I	GLN	134	79.6	39.84	0.02				17.4	62.3	44.8
3GHG.I	CYS	135			0.05
3GHG.I	GLN	136	53.5	26.76	0.02			8.1	5	47.5	34.4
3GHG.I	GLU	137	106.9	51.51	-1.05	3.58			30.5	73.7	43.2	-1
3GHG.I	PRO	138	56.2	32.71	-0.16					59.9	59.9
3GHG.I	CYS	139	12.3	7.85	0.05					18.8	18.8
3GHG.I	LYS	140	139.1	59.08	1.03	10.5		45.4		107.2	61.8	1
3GHG.I	ASP	141	25.2	14.27	-1.08	2.35				41.2	41.2	-1
3GHG.I	THR	142	85.9	49.27	0					61.2	61.2
3GHG.I	VAL	143	3.1	1.57	-0.06					8.8	8.8
3GHG.I	GLN	144	134	67.03	0.02			0.5		99.8	99.3
3GHG.I	ILE	145	26.5	11.93	-0.04			5.3	8.7	42.6	28.6
3GHG.I	HIS	146	46.1	20.99	0.04	5.56			5.2	59.5	54.3
3GHG.I	ASP	147	151.2	85.62	-1.08	3.87			54.9	90.7	35.8	-1
3GHG.I	ILE	148	68.5	30.83	-0.04					55.4	55.4
3GHG.I	THR	149	44.7	25.62	0				7.6	48.4	40.8
3GHG.I	GLY	150	5.3	5.27	0.06					11.4	11.4
3GHG.I	LYS	151	81.2	34.47	1.03	10.43		33.9		70.9	37	1
3GHG.I	ASP	152	6.1	3.44	-1.08	4.39				15.4	15.4	-1
3GHG.I	CYS	153			0.05					1.1	1.1
3GHG.I	GLN	154	8.2	4.13	0.02			2.5		16.3	13.8
3GHG.I	ASP	155	38.3	21.68	-1.08	2.94				33.5	33.5	-1
3GHG.I	ILE	156			-0.04
3GHG.I	ALA	157	10	7.3	0.05					15.9	15.9
3GHG.I	ASN	158	95.5	55.32	0.05			9.6		71.3	61.7
3GHG.I	LYS	159	126.5	53.73	1.03	10.15				91.9	91.9	1
3GHG.I	GLY	160	38.9	38.82	0.06					34.3	34.3
3GHG.I	ALA	161	16.9	12.29	0.05			3.7		18.8	15.1
3GHG.I	LYS	162	186.6	79.23	1.03	10.5		54.6		115.7	61	1
3GHG.I	GLN	163	148	74.05	0.02			4		90	86.1
3GHG.I	SER	164	37.4	25.65	-0.01					35.4	35.4
3GHG.I	GLY	165			0.06					0.3	0.3
3GHG.I	LEU	166			-0.03
3GHG.I	TYR	167			0.02	9.74		3.5		6.9	3.3
3GHG.I	PHE	168	10.9	4.17	0.03				0.3	28	27.7
3GHG.I	ILE	169			-0.04
3GHG.I	LYS	170	80.4	34.14	1.03	10.01				67.1	67.1	1
3GHG.I	PRO	171			-0.16					1.3	1.3
3GHG.I	LEU	172	131.8	58.09	-0.03			1.2		79.6	78.3
3GHG.I	LYS	173	153.1	65.03	1.03	10.15		37.9		102	64.1	1
3GHG.I	ALA	174	7.6	5.56	0.05					14.1	14.1
3GHG.I	ASN	175	147.9	85.64	0.05					87.9	87.9
3GHG.I	GLN	176	43.3	21.68	0.02			0.2		66.7	66.4
3GHG.I	GLN	177	28.2	14.13	0.02				3.4	37.5	34.1
3GHG.I	PHE	178	13	4.95	0.03					28.1	28.1
3GHG.I	LEU	179			-0.03					10	10
3GHG.I	VAL	180			-0.06
3GHG.I	TYR	181	10.6	4.02	0.03	11.97		0.9		16.7	15.8
3GHG.I	CYS	182			0.05
3GHG.I	GLU	183	38.7	18.64	-1.05	3.58			21.1	39.1	17.9	-1
3GHG.I	ILE	184	7.4	3.33	-0.04					14.2	14.2
3GHG.I	ASP	185	61.1	34.59	-1.08	2.27			0.4	49.8	49.4	-1
3GHG.I	GLY	186	98.8	98.46	0.06					56.1	56.1
3GHG.I	SER	187	76.9	52.76	-0.01					61.9	61.9
3GHG.I	GLY	188	20.7	20.59	0.06					22.6	22.6
3GHG.I	ASN	189	13	7.5	0.05					21.4	21.4
3GHG.I	GLY	190			0.06					2.7	2.7
3GHG.I	TRP	191	13.8	4.44	0.02				0.2	23.6	23.4
3GHG.I	THR	192			0					3.3	3.3
3GHG.I	VAL	193			-0.06
3GHG.I	PHE	194			0.03
3GHG.I	GLN	195			0.02
3GHG.I	LYS	196	13.8	5.85	0.99	8.76		19.6		23.5	3.9	1
3GHG.I	ARG	197			1.04	10.56				5.7	5.7	1
3GHG.I	LEU	198	21.9	9.66	-0.03			2.1		29.7	27.6
3GHG.I	ASP	199	56.8	32.17	-1.07	5.31			6	41.4	35.4	-1
3GHG.I	GLY	200	29.2	29.12	0.06				19.2	24.5	5.3
3GHG.I	SER	201	76	52.11	-0.01				13.4	52.9	39.5
3GHG.I	VAL	202	29.3	14.97	-0.06			1.7	3.9	39.5	33.9
3GHG.I	ASP	203	82.6	46.77	-1.08	3.19			0.4	59.4	59	-1
3GHG.I	PHE	204	2.9	1.1	0.03					14.3	14.3
3GHG.I	LYS	205	89.3	37.91	1.03	10.43				85.8	85.8	1
3GHG.I	LYS	206	38.5	16.36	1.02	9.52		20.5		45.2	24.6	1
3GHG.I	ASN	207	27	15.66	0.05					29.4	29.4
3GHG.I	TRP	208	11.4	3.65	0.02					35.6	35.6
3GHG.I	ILE	209	71.4	32.15	-0.04					53.2	53.2
3GHG.I	GLN	210	11.4	5.7	0.02			0.9	1.6	31.5	29
3GHG.I	TYR	211	0.9	0.34	0.03	11.39				5.5	5.5
3GHG.I	LYS	212	48.9	20.79	1.03					49.9	49.9	1
3GHG.I	GLU	213	28.1	13.56	-1.05	1.73				26.6	26.6	-1
3GHG.I	GLY	214			0.06					2.2	2.2
3GHG.I	PHE	215	11.9	4.54	0.03			7.4		19	11.6
3GHG.I	GLY	216	6	5.95	0.06			4.1		15.5	11.4
3GHG.I	HIS	217	15.8	7.18	0.03	3.4				27.8	27.8
3GHG.I	LEU	218			-0.03
3GHG.I	SER	219	0.8	0.56	-0.01					4.7	4.7
3GHG.I	PRO	220	31.4	18.31	-0.16					35.9	35.9
3GHG.I	THR	221	116.4	66.76	0					69.9	69.9
3GHG.I	GLY	222	9	8.98	0.06					10.6	10.6
3GHG.I	THR	223	79.3	45.46	0			0.3		60.2	59.9
3GHG.I	THR	224			0					11.4	11.4
3GHG.I	GLU	225			-1.05	1.95				5.2	5.2	-1
3GHG.I	PHE	226			0.03
3GHG.I	TRP	227			0.02
3GHG.I	LEU	228			-0.03
3GHG.I	GLY	229			0.06
3GHG.I	ASN	230	0.9	0.52	0.05					3.2	3.2
3GHG.I	GLU	231	41.3	19.9	-1.05	2.79			16.2	36.5	20.2	-1
3GHG.I	LYS	232	17.5	7.41	0.03	6.2		9		27.8	18.8	1
3GHG.I	ILE	233			-0.04
3GHG.I	HIS	234	22.3	10.14	0.05	5.77			0.5	24.1	23.6
3GHG.I	LEU	235	30.2	13.31	-0.03				0.9	35.7	34.8
3GHG.I	ILE	236			-0.04
3GHG.I	SER	237			-0.01
3GHG.I	THR	238	20.2	11.58	0			6.3		36	29.7
3GHG.I	GLN	239			0.02					4.1	4.1
3GHG.I	SER	240	61.2	41.97	-0.01			16.3		58.5	42.2
3GHG.I	ALA	241	93.7	68.25	0.05			8.2		60	51.9
3GHG.I	ILE	242	77.1	34.71	-0.04					60.2	60.2
3GHG.I	PRO	243	44.7	26.02	-0.16		16.2	0.2		44.3	27.9
3GHG.I	TYR	244	1.5	0.57	0.03					7.6	7.6
3GHG.I	ALA	245			0.05
3GHG.I	LEU	246			-0.03
3GHG.I	ARG	247	49.9	18.47	1.04	14				37.9	37.9	1
3GHG.I	VAL	248			-0.06
3GHG.I	GLU	249	36.3	17.51	-1.05	1.23			15.6	30.5	14.9	-1
3GHG.I	LEU	250	1	0.43	-0.03					4.3	4.3
3GHG.I	GLU	251	29	13.96	-1.05	4.92				25.2	25.2	-1
3GHG.I	ASP	252	1	0.55	-1.08	1.61				3.3	3.3	-1
3GHG.I	TRP	253	64.9	20.87	0.02			6.5		54.7	48.1
3GHG.I	ASN	254	99.1	57.38	0.05					71.3	71.3
3GHG.I	GLY	255	73.6	73.4	0.06					45.1	45.1
3GHG.I	ARG	256	144.1	53.37	1.04	12.29				99.2	99.2	1
3GHG.I	THR	257	84.4	48.39	0				17.6	66.6	49
3GHG.I	SER	258			-0.01				1.2	9.2	8
3GHG.I	THR	259	35.5	20.34	0				12.9	40.4	27.5
3GHG.I	ALA	260			0.05
3GHG.I	ASP	261	6.4	3.61	-1.08	2.44				13.6	13.6	-1
3GHG.I	TYR	262			0.03	13.83
3GHG.I	ALA	263			0.05
3GHG.I	MET	264	62	25.35	0		31.5	0.3		48.3	16.5
3GHG.I	PHE	265			0.03
3GHG.I	LYS	266	58.1	24.68	1.02	9.36		19.7		52.5	32.7	1
3GHG.I	VAL	267			-0.06
3GHG.I	GLY	268	3.4	3.35	0.06					7.3	7.3
3GHG.I	PRO	269	65.6	38.18	-0.16					44	44
3GHG.I	GLU	270	66.9	32.25	-1.05	1.42			15.1	46.5	31.4	-1
3GHG.I	ALA	271	105.5	76.85	0.05					66.1	66.1
3GHG.I	ASP	272	52.7	29.82	-1.08	2.4				35.6	35.6	-1
3GHG.I	LYS	273	59.1	25.12	1.03	10.22		29.5		44.1	14.6	1
3GHG.I	TYR	274	0.9	0.33	0.03					8.5	8.5
3GHG.I	ARG	275	70.9	26.25	1.04	11.87		14.4		60.1	45.7	1
3GHG.I	LEU	276			-0.03
3GHG.I	THR	277	52.4	30.03	0					40.5	40.5
3GHG.I	TYR	278	18.3	6.91	0.03				1.7	24.3	22.6
3GHG.I	ALA	279	63.8	46.45	0.05		7			38.5	31.5
3GHG.I	TYR	280	124.9	47.26	0.03	10.07	37			77.9	40.9
3GHG.I	PHE	281	63.9	24.37	0.03				1.2	47.3	46.1
3GHG.I	ALA	282	43.9	31.99	0.05		5.2			34.2	29
3GHG.I	GLY	283	17	16.92	0.06					18.3	18.3
3GHG.I	GLY	284	35.7	35.64	0.06					27.9	27.9
3GHG.I	ASP	285	115.9	65.6	-1.08	2.59			25.7	68	42.3	-1
3GHG.I	ALA	286			0.05
3GHG.I	GLY	287	18.9	18.88	0.06					16.2	16.2
3GHG.I	ASP	288	29.8	16.87	-1.08	4.46			13.6	35.3	21.8	-1
3GHG.I	ALA	289			0.05
3GHG.I	PHE	290			0.03
3GHG.I	ASP	291	67.7	38.31	-1.08	3.52			35.8	43.3	7.5	-1
3GHG.I	GLY	292			0.06					0.4	0.4
3GHG.I	PHE	293	83.3	31.79	0.03					50.2	50.2
3GHG.I	ASP	294	64.8	36.69	-1.08	2.57			26.3	58	31.7	-1
3GHG.I	PHE	295	40.2	15.33	0.03				2.3	51.3	49
3GHG.I	GLY	296	65.2	64.98	0.06				14.1	38.7	24.6
3GHG.I	ASP	297	106.2	60.1	-1.08	2.58			34.2	64.7	30.5	-1
3GHG.I	ASP	298	69.3	39.2	-1.08	3.05			42	45.4	3.4	-1
3GHG.I	PRO	299	132.5	77.19	-0.16				15.2	78.1	62.9
3GHG.I	SER	300	49.1	33.65	-0.01		0.5		7.5	40.8	32.8
3GHG.I	ASP	301	12.1	6.84	-1.08	4.39			13.9	16.9	2.9	-1
3GHG.I	LYS	302	83.8	35.57	1.03	9.87			1.7	63.3	61.5	1
3GHG.I	PHE	303	147.2	56.16	0.03		68.2			100.3	32.1
3GHG.I	PHE	304	63.6	24.29	0.03		37.2		0.5	50.4	12.7
3GHG.I	THR	305	4.4	2.51	0					11.8	11.8
3GHG.I	SER	306	14.4	9.88	-0.01					25.1	25.1
3GHG.I	HIS	307			0.03
3GHG.I	ASN	308	50.9	29.46	0.05					44.8	44.8
3GHG.I	GLY	309	25.8	25.72	0.06					21	21
3GHG.I	MET	310	11.5	4.69	0			2.5		15.1	12.5
3GHG.I	GLN	311	35.4	17.74	0.02					29.7	29.7
3GHG.I	PHE	312	0.9	0.34	0.03					4.9	4.9
3GHG.I	SER	313			-0.01
3GHG.I	THR	314			0					0.2	0.2
3GHG.I	TRP	315	120.1	38.6	0.02		56.7			93	36.3
3GHG.I	ASP	316	56	31.69	-1.08	1.4	0.6			44.1	43.5	-1
3GHG.I	ASN	317	48.4	28.04	0.05			9.7		41.5	31.8
3GHG.I	ASP	318	56.6	32.02	-1.08	3.1				38.3	38.3	-1
3GHG.I	ASN	319	24.6	14.23	0.05			4.9		31.6	26.7
3GHG.I	ASP	320	15.4	8.71	-1.07	5.5				10.8	10.8	-1
3GHG.I	LYS	321	113.2	48.08	1.03	10.36	5.2	28.9		83.4	49.3	1
3GHG.I	PHE	322	42	16.02	0.03		27.6			52.3	24.7
3GHG.I	GLU	323	174.7	84.22	-1.05	4.16				101.2	101.2	-1
3GHG.I	GLY	324	25.6	25.56	0.06					25.4	25.4
3GHG.I	ASN	325	37.8	21.9	0.05					37.3	37.3
3GHG.I	CYS	326			0.05		1		0.4	4.5	3.1
3GHG.I	ALA	327			0.05
3GHG.I	GLU	328	79.1	38.15	-1.05	4.2				49.9	49.9	-1
3GHG.I	GLN	329	40.2	20.1	0.02				0.8	50.8	50.1
3GHG.I	ASP	330	4.4	2.49	-1.05	5.81			8.5	8.5		-1
3GHG.I	GLY	331	2.5	2.45	0.06					12.6	12.6
3GHG.I	SER	332			-0.01					4.9	4.9
3GHG.I	GLY	333			0.06
3GHG.I	TRP	334			0.02
3GHG.I	TRP	335			0.02
3GHG.I	MET	336			0
3GHG.I	ASN	337	1	0.57	0.05					4.6	4.6
3GHG.I	LYS	338	73.2	31.11	1.03	10.29	9.5			66.6	57.1	1
3GHG.I	CYS	339	24.9	15.94	0.05		8.3		0.2	27.1	18.6
3GHG.I	HIS	340	6.6	3.02	0.03	3.21			13	22.6	9.5
3GHG.I	ALA	341			0.05
3GHG.I	GLY	342			0.06
3GHG.I	HIS	343			0
3GHG.I	LEU	344			-0.03
3GHG.I	ASN	345			0.05
3GHG.I	GLY	346			0.06					0.1	0.1
3GHG.I	VAL	347	49.1	25.11	-0.06		24.9			45.6	20.7
3GHG.I	TYR	348	20.5	7.74	0.03	10.94		0.6	0.5	28.7	27.5
3GHG.I	TYR	349	26.6	10.05	-0.05	8.49	12.1			30.9	18.9
3GHG.I	GLN	350	139.7	69.91	0.02			7.7	8.4	90.1	74
3GHG.I	GLY	351	47.2	47.03	0.06					32.5	32.5
3GHG.I	GLY	352	0.8	0.81	0.06					4	4
3GHG.I	THR	353	117.8	67.55	0					81.2	81.2
3GHG.I	TYR	354	19	7.2	0.03	12.64				23.7	23.7
3GHG.I	SER	355	48.7	33.42	-0.01			3.9		36.2	32.3
3GHG.I	LYS	356	127.4	54.11	1.03	10.5		58.5	4.4	93.7	30.8	1
3GHG.I	ALA	357	108.3	78.9	0.05			0.3	10.5	64.8	54
3GHG.I	SER	358	66.9	45.85	-0.01					48.9	48.9
3GHG.I	THR	359	6.8	3.91	0				9.5	9.8	0.2
3GHG.I	PRO	360	105	61.16	-0.16		13.1		12.1	67.2	42.1
3GHG.I	ASN	361	96.8	56.06	0.05					62.4	62.4
3GHG.I	GLY	362	28.6	28.55	0.06					29.4	29.4
3GHG.I	TYR	363	140.8	53.29	0.03	10	45.1		5.4	98.7	48.2
3GHG.I	ASP	364	12.9	7.31	-1.08	4.37			16.2	24.1	8	-1
3GHG.I	ASN	365			0.05
3GHG.I	GLY	366			0.06
3GHG.I	ILE	367			-0.04
3GHG.I	ILE	368			-0.04				2.1	2.1
3GHG.I	TRP	369			0.02
3GHG.I	ALA	370	5.6	4.08	0.05					9.8	9.8
3GHG.I	THR	371	31.7	18.17	0					30.4	30.4
3GHG.I	TRP	372	68.6	22.06	0.02					60.1	60.1
3GHG.I	LYS	373	46.5	19.74	1.02	9.52				50.9	50.9	1
3GHG.I	THR	374	81.2	46.53	0					60.2	60.2
3GHG.I	ARG	375	56.7	21	1.04	12.88			0.5	74.4	73.9	1
3GHG.I	TRP	376	59.6	19.17	0.02			2.7		64	61.3
3GHG.I	TYR	377	31.7	12.01	0.03	11.21				31	31
3GHG.I	SER	378			-0.01
3GHG.I	MET	379			0
3GHG.I	LYS	380	55.6	23.61	1.03	10.36		30.2		43.9	13.8	1
3GHG.I	LYS	381	58.3	24.75	1.03	10.32		39.2		54.7	15.5	1
3GHG.I	THR	382			0
3GHG.I	THR	383	11.1	6.39	0			0.2	0.2	12.8	12.4
3GHG.I	MET	384			0
3GHG.I	LYS	385	2.2	0.92	1.03	12.34			1.5	15.6	14.1	1
3GHG.I	ILE	386			-0.04					2.3	2.3
3GHG.I	ILE	387			-0.04					2.4	2.4
3GHG.I	PRO	388	7.6	4.45	-0.16					21.5	21.5
3GHG.I	PHE	389	34.3	13.07	0.03		33.5			40.8	7.3
3GHG.I	ASN	390	68.2	39.48	0.05			8		62.7	54.6
3GHG.I	ARG	391	55.6	20.57	1.04	11.8		21.9		47	25.1	1
3GHG.I	LEU	392	49.8	21.95	-0.03		8.4			49.8	41.4
3GHG.I	THR	393	96.1	55.08	0		8.4			70.3	62
3GHG.I	ILE	394	163.9	73.77	-0.04		51.4			93.1	41.7
3GHG.I	GLY	395	62.6	62.4	0					48.8	48.8
3GHG.I	CA	601								8.8	8.8	2
3GHG.H	LYS	58	212	90.01	2.05	9.15		69.9	0.9	134.4	63.6	2
3GHG.H	ALA	59	75.4	54.89	0.05			6.3	0.1	53.4	47
3GHG.H	PRO	60	33.3	19.4	-0.16				11.4	42.9	31.5
3GHG.H	ASP	61	38.3	21.68	-1.08	3.97			15.8	34.6	18.7	-1
3GHG.H	ALA	62	51.3	37.37	0.05			2		29.7	27.7
3GHG.H	GLY	63	18.4	18.35	0.06			12.7		17.5	4.8
3GHG.H	GLY	64	8.9	8.89	0.06			3.1		13.9	10.9
3GHG.H	CYS	65	1.4	0.88	0.05					11	11
3GHG.H	LEU	66	58.2	25.66	-0.03		30.5			51.1	20.7
3GHG.H	HIS	67	38	17.28	0.11	6.36	2.5			36.6	34.1
3GHG.H	ALA	68	110.8	80.72	0.05					65.3	65.3
3GHG.H	ASP	69	48.2	27.29	-1.08	3.22			22.9	47.6	24.7	-1
3GHG.H	PRO	70	141.1	82.18	-0.16				5.2	92.9	87.7
3GHG.H	ASP	71	69	39.08	-1.08	4.21			39.8	56	16.1	-1
3GHG.H	LEU	72	27.9	12.32	-0.03		27.2		0.6	44.9	17.1
3GHG.H	GLY	73	12.5	12.43	0.06			4.6		19.9	15.3
3GHG.H	VAL	74	31.9	16.34	-0.06		16.1	8.7		51.5	26.6
3GHG.H	LEU	75			-0.03
3GHG.H	CYS	76	8.8	5.62	0.05		6.3			18.5	12.2
3GHG.H	PRO	77	3.6	2.1	-0.16			4		10	6
3GHG.H	THR	78	5.3	3.03	0		0.7			15.6	14.9
3GHG.H	GLY	79	5.6	5.56	0.06					9.3	9.3
3GHG.H	CYS	80	39.2	25.1	0.05		16			35.4	19.4
3GHG.H	GLN	81	48.8	24.41	0.02			11.7		50.8	39.1
3GHG.H	LEU	82			-0.03
3GHG.H	GLN	83	19.7	9.84	0.02		0.3		4.6	26	21
3GHG.H	GLU	84	91	43.85	-1.05	4.57			33.8	60.3	26.5	-1
3GHG.H	ALA	85	23.4	17.04	0.05			2.4		28.5	26.1
3GHG.H	LEU	86			-0.03
3GHG.H	LEU	87	52.4	23.11	-0.03				2.2	45.6	43.4
3GHG.H	GLN	88	101.3	50.68	0.02			1.1	9.6	61.9	51.2
3GHG.H	GLN	89	45.2	22.61	0.02					40.4	40.4
3GHG.H	GLU	90	22	10.6	-1.05	4.36				24.2	24.2	-1
3GHG.H	ARG	91	143.7	53.19	1.04	11.87		33		98.3	65.3	1
3GHG.H	PRO	92	80.7	47.01	-0.16					53.3	53.3
3GHG.H	ILE	93	0.4	0.18	-0.04					16.2	16.2
3GHG.H	ARG	94	104.7	38.77	1.04	12.36		46.2		105	58.8	1
3GHG.H	ASN	95	91.2	52.8	0.05					62.5	62.5
3GHG.H	SER	96	23.5	16.1	-0.01					24.5	24.5
3GHG.H	VAL	97	17.5	8.96	-0.06					17.1	17.1
3GHG.H	ASP	98	81.8	46.3	-1.08	3.35				46.1	46.1	-1
3GHG.H	GLU	99	76.6	36.95	-1.05	4.99				54.8	54.8	-1
3GHG.H	LEU	100			-0.03		0.3			2.8	2.5
3GHG.H	ASN	101	52.3	30.28	0.05				6.6	39.4	32.8
3GHG.H	ASN	102	91.9	53.21	0.05					61.2	61.2
3GHG.H	ASN	103	38.1	22.08	0.05					31.9	31.9
3GHG.H	VAL	104	1	0.5	-0.06					8.2	8.2
3GHG.H	GLU	105	83.6	40.32	-1.05	4.65			8.4	64.8	56.4	-1
3GHG.H	ALA	106	71.3	51.94	0.05					45.8	45.8
3GHG.H	VAL	107	57.8	29.58	-0.06					50.4	50.4
3GHG.H	SER	108			-0.01					6.9	6.9
3GHG.H	GLN	109	90.9	45.48	0.02					70	70
3GHG.H	THR	110	76.3	43.74	0					54.8	54.8
3GHG.H	SER	111			-0.01
3GHG.H	SER	112	44.5	30.55	-0.01					39.7	39.7
3GHG.H	SER	113	66.3	45.43	-0.01					52.8	52.8
3GHG.H	SER	114	35.3	24.17	-0.01					37.5	37.5
3GHG.H	PHE	115	0.9	0.33	0.03		2.2			6.6	4.4
3GHG.H	GLN	116	57.5	28.77	0.02					58.7	58.7
3GHG.H	TYR	117	82.4	31.18	0.03	10	25.3			66	40.7
3GHG.H	MET	118	1.2	0.49	0		6.5			21.9	15.4
3GHG.H	TYR	119	136.6	51.7	0.03	10.4	34.8			101.7	66.9
3GHG.H	LEU	120	81.4	35.85	-0.03		36.5			65.6	29.1
3GHG.H	LEU	121	77.8	34.31	-0.03		53.1			84.7	31.6
3GHG.H	LYS	122	11	4.69	1.02	9.49	17.1			37.5	20.4	1
3GHG.H	ASP	123	51.2	29.01	-1.08	4.08				38.4	38.4	-1
3GHG.H	LEU	124	107.8	47.5	-0.03		52			76.8	24.8
3GHG.H	TRP	125	44.7	14.38	0.02		40.2		1.5	76.9	35.3
3GHG.H	GLN	126	42.3	21.17	0.02			1.8		41	39.3
3GHG.H	LYS	127	168.8	71.7	1.03	10.5	10.7	62		111.5	38.9	1
3GHG.H	ARG	128	106.4	39.38	1.04	12.29	8	35.8		91	47.2	1
3GHG.H	GLN	129	7.4	3.72	0.02		2.6	2.5	2	31.5	24.4
3GHG.H	LYS	130	110.1	46.78	1.03	10.01		41.1		83.8	42.8	1
3GHG.H	GLN	131	131.1	65.62	0.02			0		86.1	86.1
3GHG.H	VAL	132	65.8	33.68	-0.06				0	54.6	54.6
3GHG.H	LYS	133	94.5	40.15	1.03	10.29		30	5	75.9	41	1
3GHG.H	ASP	134	99.2	56.16	-1.08	3.8			48.7	65.1	16.3	-1
3GHG.H	ASN	135	79.1	45.78	0.05				12.3	60.2	47.9
3GHG.H	GLU	136	66.7	32.17	-1.05	4.57			62.1	86	23.9	-1
3GHG.H	ASN	137	93.6	54.18	0.05				29.1	75.8	46.8
3GHG.H	VAL	138	82.4	42.18	-0.06				6.1	61.7	55.5
3GHG.H	VAL	139	21.2	10.87	-0.06		19.4			45.9	26.4
3GHG.H	ASN	140	77.9	45.12	0.05				29.4	68.6	39.2
3GHG.H	GLU	141	115.3	55.6	-1.05	4.5			28	70.2	42.2	-1
3GHG.H	TYR	142	73.7	27.89	0.01	9.26	37.7		0.5	84.6	46.4
3GHG.H	SER	143	11.3	7.76	-0.01					23.3	23.3
3GHG.H	SER	144	32.5	22.28	-0.01			2.7	1	35.7	32
3GHG.H	GLU	145	51.3	24.72	-1.05	4.78	1.1		29.4	54.4	23.9	-1
3GHG.H	LEU	146	4.9	2.18	-0.03		14			38.1	24.2
3GHG.H	GLU	147	93.8	45.23	-1.05	4.57			35.3	82.6	47.2	-1
3GHG.H	LYS	148	114.3	48.55	1.03	10.43		51		95.4	44.4	1
3GHG.H	HIS	149	13.7	6.25	0.14	6.52	0.2		5.5	37.4	31.8
3GHG.H	GLN	150	18.7	9.34	0.02					36	36
3GHG.H	LEU	151	105.2	46.38	-0.03		44.3		2.6	72.5	25.7
3GHG.H	TYR	152	68.4	25.88	0.01	9.18	6.6			78.1	71.5
3GHG.H	ILE	153	7.1	3.21	-0.04		9.6			19.2	9.6
3GHG.H	ASP	154	29.9	16.9	-1.08	2.93			24.1	26.5	2.4	-1
3GHG.H	GLU	155	88.9	42.87	-1.05	5.06	2.5		34.1	57.6	21	-1
3GHG.H	THR	156	2.5	1.43	0					21.7	21.7
3GHG.H	VAL	157			-0.06
3GHG.H	ASN	158	70.5	40.81	0.05				12.8	60.1	47.3
3GHG.H	SER	159	44.3	30.36	-0.01				10.2	35.4	25.2
3GHG.H	ASN	160	42.8	24.78	0.05					56.8	56.8
3GHG.H	ILE	161	1.3	0.57	-0.04					11.8	11.8
3GHG.H	PRO	162	36.9	21.5	-0.16					38.6	38.6
3GHG.H	THR	163	70.4	40.35	0			0.8		48.4	47.6
3GHG.H	ASN	164	1.4	0.79	0.05					23.4	23.4
3GHG.H	LEU	165	6.2	2.74	-0.03					21.9	21.9
3GHG.H	ARG	166	146.8	54.35	1.04	12.01		42.1		99.3	57.2	1
3GHG.H	VAL	167	3.2	1.64	-0.06			3.7		7.5	3.8
3GHG.H	LEU	168	0.9	0.38	-0.03					7.4	7.4
3GHG.H	ARG	169	90.2	33.39	1.04	12.29	0.5		0.3	74.7	73.8	1
3GHG.H	SER	170	48.8	33.47	-0.01				0.4	41.7	41.4
3GHG.H	ILE	171			-0.04
3GHG.H	LEU	172	0.9	0.4	-0.03		2.3			7.3	5
3GHG.H	GLU	173	100.6	48.5	-1.05	4.5			36.4	77.3	40.9	-1
3GHG.H	ASN	174	37.7	21.81	0.05				1.6	39.9	38.3
3GHG.H	LEU	175	0.9	0.38	-0.03					2.5	2.5
3GHG.H	ARG	176	82.6	30.58	1.04	11.8		33		66.5	33.5	1
3GHG.H	SER	177	58.1	39.84	-0.01					36.8	36.8
3GHG.H	LYS	178	26.3	11.18	1.03	10.51			0.1	38.9	38.8	1
3GHG.H	ILE	179			-0.04					5.9	5.9
3GHG.H	GLN	180	97	48.55	0.02			0.7	17.3	76.6	58.6
3GHG.H	LYS	181	72	30.58	1.03	10.17				57.5	57.5	1
3GHG.H	LEU	182			-0.03
3GHG.H	GLU	183	72.7	35.04	-1.05	4.5			35.4	57.4	22	-1
3GHG.H	SER	184	60.6	41.59	-0.01					45.6	45.6
3GHG.H	ASP	185	12	6.78	-1.08	2.39				13.1	13.1	-1
3GHG.H	VAL	186			-0.06
3GHG.H	SER	187	46	31.53	-0.01					35.7	35.7
3GHG.H	ALA	188	27	19.68	0.05					25.3	25.3
3GHG.H	GLN	189			0.02
3GHG.H	MET	190	38.6	15.78	0					45.5	45.5
3GHG.H	GLU	191	100	48.2	-1.05	4.64				70.6	70.6	-1
3GHG.H	TYR	192	85.1	32.19	0.02	9.8		8		62.2	54.2
3GHG.H	CYS	193	16.5	10.58	0.05					21.6	21.6
3GHG.H	ARG	194	173.5	64.25	1.04	12.43				121.5	121.5	1
3GHG.H	THR	195	86.3	49.48	0					54.3	54.3
3GHG.H	PRO	196	75.7	44.1	-0.16					73.9	73.9
3GHG.H	CYS	197	18	11.56	0.05					21.5	21.5
3GHG.H	THR	198	86.3	49.49	0					66.4	66.4
3GHG.H	VAL	199	10.2	5.21	-0.06					23.9	23.9
3GHG.H	SER	200	40.3	27.61	-0.01					33.5	33.5
3GHG.H	CYS	201			0.05					5.8	5.8
3GHG.H	ASN	202	15.6	9.04	0.05					18.3	18.3
3GHG.H	ILE	203			-0.04
3GHG.H	PRO	204	4.1	2.38	-0.16					12.1	12.1
3GHG.H	VAL	205			-0.06					2.4	2.4
3GHG.H	VAL	206	7.6	3.91	-0.06					19.5	19.5
3GHG.H	SER	207	4	2.73	-0.01			4.7		30.2	25.5
3GHG.H	GLY	208			0.06
3GHG.H	LYS	209	69.8	29.62	1.03	12.11	18.7	15.6		63.5	29.2	1
3GHG.H	GLU	210	3	1.43	-1	6.13	0.4			9.1	8.7	-1
3GHG.H	CYS	211			0.05
3GHG.H	GLU	212	18.5	8.92	-1.05	3.73				17	17	-1
3GHG.H	GLU	213	41.1	19.81	-1.05					33.6	33.6	-1
3GHG.H	ILE	214			-0.04
3GHG.H	ILE	215	36.3	16.35	-0.04				10	40.6	30.7
3GHG.H	ARG	216	136.3	50.45	1.04	11.94				99.8	99.8	1
3GHG.H	LYS	217	22.4	9.51	1.02	9.62		15		47.9	32.9	1
3GHG.H	GLY	218	10.1	10.07	0.06				2.4	20.5	18.1
3GHG.H	GLY	219	8.4	8.37	0.06					11.2	11.2
3GHG.H	GLU	220	104.2	50.23	-1.05	4.96			25.5	77.6	52	-1
3GHG.H	THR	221	68.6	39.32	0					53	53
3GHG.H	SER	222	31.4	21.56	-0.01					34.4	34.4
3GHG.H	GLU	223	0.4	0.21	-1.05	4.99				6.6	6.6	-1
3GHG.H	MET	224	0.9	0.36	0					14.6	14.6
3GHG.H	TYR	225	2.1	0.8	0.03	12.9				7.5	7.5
3GHG.H	LEU	226	0.4	0.17	-0.03			0.1		8.9	8.8
3GHG.H	ILE	227			-0.04
3GHG.H	GLN	228	1.1	0.54	0.02					15.5	15.5
3GHG.H	PRO	229	8.6	5.03	-0.16				4.2	8.9	4.7
3GHG.H	ASP	230	62.3	35.27	-1.08	3.26			23.3	41.1	17.9	-1
3GHG.H	SER	231	90.9	62.32	-0.01					66.5	66.5
3GHG.H	SER	232	119.3	81.81	-0.01				10.2	60.6	50.4
3GHG.H	VAL	233	44.4	22.72	-0.06				2.1	44.9	42.8
3GHG.H	LYS	234	141	59.89	1.03	9.74		43.8		94	50.2	1
3GHG.H	PRO	235	1	0.59	-0.16					8.1	8.1
3GHG.H	TYR	236	11.6	4.39	0.03	11.59		13.5		18	4.4
3GHG.H	ARG	237	52.9	19.57	1.04	11.88		35.5		65.5	30	1
3GHG.H	VAL	238			-0.06
3GHG.H	TYR	239	10.2	3.84	0.03	11.18				14.8	14.8
3GHG.H	CYS	240			0.05
3GHG.H	ASP	241	4.4	2.51	-1.08					12.6	12.6	-1
3GHG.H	MET	242	11.4	4.68	0					11.6	11.6
3GHG.H	ASN	243	108.7	62.98	0.05					70.3	70.3
3GHG.H	THR	244	62.3	35.7	0					45.6	45.6
3GHG.H	GLU	245	53.8	25.92	-1.05	3.65				52.8	52.8	-1
3GHG.H	ASN	246	139.4	80.72	0.05					87	87
3GHG.H	GLY	247			0.06					2.6	2.6
3GHG.H	GLY	248			0.06
3GHG.H	TRP	249			0.02
3GHG.H	THR	250			0
3GHG.H	VAL	251	2.6	1.35	-0.06					10	10
3GHG.H	ILE	252			-0.04
3GHG.H	GLN	253			0.02
3GHG.H	ASN	254	6.8	3.95	0.05					13.7	13.7
3GHG.H	ARG	255	2.2	0.82	1.03	9.43				10.1	10.1	1
3GHG.H	GLN	256	37.5	18.75	0.02			5.6		49.6	44
3GHG.H	ASP	257	27.2	15.42	-1.08	1.32	0.2			32.9	32.7	-1
3GHG.H	GLY	258	1.7	1.65	0.06					7.9	7.9
3GHG.H	SER	259	10.2	6.98	-0.01					12	12
3GHG.H	VAL	260	3.6	1.86	-0.06					11.3	11.3
3GHG.H	ASP	261	12.6	7.15	-1.01	6.23			12	18.3	6.3	-1
3GHG.H	PHE	262	2.2	0.83	0.03					12.6	12.6
3GHG.H	GLY	263	15.1	15.03	0.06				6.7	27.1	20.3
3GHG.H	ARG	264	9.5	3.53	1.04	10.68		18.2		31	12.8	1
3GHG.H	LYS	265	89.9	38.17	1.03	10.15		41.6		68.8	27.2	1
3GHG.H	TRP	266	4	1.28	0.02					13.2	13.2
3GHG.H	ASP	267	80.9	45.81	-1.08	4.01				57.5	57.5	-1
3GHG.H	PRO	268	43.7	25.44	-0.16			3.6		39.6	36.1
3GHG.H	TYR	269			0.03	11.9
3GHG.H	LYS	270	46.3	19.65	1.03	10.08				42.8	42.8	1
3GHG.H	GLN	271	112	56.02	0.02					76.8	76.8
3GHG.H	GLY	272	19	18.9	0.06					18.1	18.1
3GHG.H	PHE	273	16.7	6.38	0.03					21.8	21.8
3GHG.H	GLY	274	4.9	4.91	0.06					18.2	18.2
3GHG.H	ASN	275	7.9	4.56	0.05					24.5	24.5
3GHG.H	VAL	276	32.6	16.66	-0.06					38	38
3GHG.H	ALA	277	2.8	2.05	0.05					10.4	10.4
3GHG.H	THR	278	39.8	22.83	0					33.7	33.7
3GHG.H	ASN	279	40.8	23.61	0.05					40.4	40.4
3GHG.H	THR	280	48.3	27.69	0					42	42
3GHG.H	ASP	281	117	66.22	-1.08	3.29				65.1	65.1	-1
3GHG.H	GLY	282	79.3	79.03	0.06					50.3	50.3
3GHG.H	LYS	283	100.4	42.62	1.03	10.22				74	74	1
3GHG.H	ASN	284	50.1	28.99	0.05					61.8	61.8
3GHG.H	TYR	285	50.3	19.03	0.03	10.6				48.5	48.5
3GHG.H	CYS	286	1.1	0.69	0.05					6.6	6.6
3GHG.H	GLY	287	10.6	10.52	0.06					14	14
3GHG.H	LEU	288	95.9	42.27	-0.03					68.5	68.5
3GHG.H	PRO	289	25.8	15.01	-0.16					33.5	33.5
3GHG.H	GLY	290	6.9	6.92	0.06					10.4	10.4
3GHG.H	GLU	291			-0.63	7.26				6.8	6.8	-1
3GHG.H	TYR	292			0.03	12.4				4.8	4.8
3GHG.H	TRP	293			0.02					1.3	1.3
3GHG.H	LEU	294	4.6	2.04	-0.03			0.8		13.2	12.4
3GHG.H	GLY	295			0.06			3.8		5.2	1.4
3GHG.H	ASN	296			0.05
3GHG.H	ASP	297	40.7	23.01	-1.08	3.34				34.7	34.7	-1
3GHG.H	LYS	298	48.2	20.45	0.63	7.57		31.4		58.5	27.1	1
3GHG.H	ILE	299			-0.04
3GHG.H	SER	300			-0.01					0.8	0.8
3GHG.H	GLN	301	36.9	18.46	0.02			0.1	4.8	42.7	37.8
3GHG.H	LEU	302			-0.03
3GHG.H	THR	303			0					2.1	2.1
3GHG.H	ARG	304	102.1	37.82	1.04	11.45		30.5		79.4	48.9	1
3GHG.H	MET	305	81.4	33.28	0		19.9		1.2	70.1	49
3GHG.H	GLY	306	21.7	21.66	0.06					28.7	28.7
3GHG.H	PRO	307	103.7	60.37	-0.16		22.8			72.8	50
3GHG.H	THR	308			0					1.2	1.2
3GHG.H	GLU	309	12.3	5.91	-1.05	1.03			16.4	17.8	1.4	-1
3GHG.H	LEU	310			-0.03					2.5	2.5
3GHG.H	LEU	311	0.9	0.38	-0.03					4.8	4.8
3GHG.H	ILE	312			-0.04					0.9	0.9
3GHG.H	GLU	313	37.7	18.18	-1.05	4.07				39.8	39.8	-1
3GHG.H	MET	314	1.2	0.48	0					4.1	4.1
3GHG.H	GLU	315	17.2	8.27	-1.05	4.52				16	16	-1
3GHG.H	ASP	316	3.6	2.04	-1.08	2.17			0.8	3.1	2.4	-1
3GHG.H	TRP	317	40.1	12.89	0.02		15.8	0.1		51.2	35.3
3GHG.H	LYS	318	202.2	85.86	1.03	10.5		45.2	11.9	113.9	56.8	1
3GHG.H	GLY	319	33.9	33.81	0.06				9.5	30.3	20.8
3GHG.H	ASP	320	84.1	47.64	-1.08	3.94			34.1	50.9	16.8	-1
3GHG.H	LYS	321	148.5	63.08	1.03	10.5		29.7		91.4	61.6	1
3GHG.H	VAL	322	14.4	7.37	-0.06					20.9	20.9
3GHG.H	LYS	323	66	28.04	1.03	10.36		38.3		58.1	19.7	1
3GHG.H	ALA	324			0.05
3GHG.H	HIS	325	2.6	1.17	0.04	5.52			0.6	14.6	14
3GHG.H	TYR	326			0.01	9.06
3GHG.H	GLY	327	3.9	3.85	0.06			0.3		15.2	14.9
3GHG.H	GLY	328	9.1	9.09	0.06					17.9	17.9
3GHG.H	PHE	329			0.03					1.5	1.5
3GHG.H	THR	330	41.4	23.75	0					38.9	38.9
3GHG.H	VAL	331			-0.06
3GHG.H	GLN	332	46.5	23.25	0.02					44.5	44.5
3GHG.H	ASN	333	54.1	31.35	0.05			15		45.4	30.4
3GHG.H	GLU	334	57.9	27.89	-1.05	3.46				53.2	53.2	-1
3GHG.H	ALA	335	98.7	71.86	0.05					60.4	60.4
3GHG.H	ASN	336	69.5	40.23	0.05			4.5		49.1	44.6
3GHG.H	LYS	337	81.2	34.5	1.03	10.29				61.7	61.7	1
3GHG.H	TYR	338			0.03
3GHG.H	GLN	339	56.4	28.21	0.02					43.7	43.7
3GHG.H	ILE	340			-0.04					9.5	9.5
3GHG.H	SER	341	33.9	23.27	-0.01					30.9	30.9
3GHG.H	VAL	342	1	0.52	-0.06					1	1
3GHG.H	ASN	343	62.2	36.05	0.05					51.3	51.3
3GHG.H	LYS	344	134.5	57.14	1.03	10.29		36.1		101.1	64.9	1
3GHG.H	TYR	345	60.9	23.05	0.03	10.29				48.9	48.9
3GHG.H	ARG	346	139.2	51.56	1.04	12.08		35.7		99.2	63.5	1
3GHG.H	GLY	347	25	24.96	0.06			7.4		23.4	16
3GHG.H	THR	348	95	54.46	0			0.4		66.2	65.8
3GHG.H	ALA	349	1.7	1.2	0.05					2.6	2.6
3GHG.H	GLY	350	22	21.9	0.06					17.7	17.7
3GHG.H	ASN	351	9.7	5.61	0.05				5.1	22.4	17.4
3GHG.H	ALA	352			0.05
3GHG.H	LEU	353			-0.03					10.6	10.6
3GHG.H	MET	354	46	18.81	0				6.7	42.6	35.8
3GHG.H	ASP	355	70.7	40	-1.08	4.15			32.6	54	21.3	-1
3GHG.H	GLY	356			0.06					0.9	0.9
3GHG.H	ALA	357			0.05
3GHG.H	SER	358	64	43.9	-0.01					43	43
3GHG.H	GLN	359	104.1	52.11	0.02					69.1	69.1
3GHG.H	LEU	360	65.8	28.98	-0.03					51.6	51.6
3GHG.H	MET	361	162.2	66.3	0		54			96.9	42.9
3GHG.H	GLY	362	53.8	53.68	0.06					35.2	35.2
3GHG.H	GLU	363	161.3	77.74	-1.05	4.5			43.6	98.3	54.7	-1
3GHG.H	ASN	364	68.6	39.75	0.05					48.7	48.7
3GHG.H	ARG	365	60.9	22.57	1.04	11.73				55.7	55.7	1
3GHG.H	THR	366	81.2	46.58	0					56.2	56.2
3GHG.H	MET	367	55.2	22.55	0			0.2		57.4	57.2
3GHG.H	THR	368	7.2	4.11	0					11.8	11.8
3GHG.H	ILE	369	36.2	16.28	-0.04				0.7	31.6	30.9
3GHG.H	HIS	370			0.03	1.13
3GHG.H	ASN	371	47.5	27.53	0.05					46.9	46.9
3GHG.H	GLY	372	34.1	33.97	0.06					31.7	31.7
3GHG.H	MET	373	17.5	7.15	0					21.4	21.4
3GHG.H	PHE	374	65	24.78	0.03					44.2	44.2
3GHG.H	PHE	375			0.03
3GHG.H	SER	376			-0.01
3GHG.H	THR	377			0
3GHG.H	TYR	378	79	29.9	0.03	11.19		8.3		74.6	66.3
3GHG.H	ASP	379	74.8	42.34	-1.08	2.57		0.3		53.3	53	-1
3GHG.H	ARG	380	97.5	36.11	1.04	12.08				79.8	79.8	1
3GHG.H	ASP	381	62.4	35.33	-1.08	2.88				49.9	49.9	-1
3GHG.H	ASN	382	26.8	15.49	0.05					39.3	39.3
3GHG.H	ASP	383	7.5	4.23	-1.08	4.32				10.5	10.5	-1
3GHG.H	GLY	384	16.4	16.37	0.06					18.4	18.4
3GHG.H	TRP	385	52.5	16.87	0.02			10.7	4.8	45	29.4
3GHG.H	LEU	386	176	77.56	-0.03		52.1	2.2		106.9	52.6
3GHG.H	THR	387	83.3	47.74	0			2		65.6	63.6
3GHG.H	SER	388	128.9	88.38	-0.01					75.1	75.1
3GHG.H	ASP	389	48.2	27.27	-1.08	3.02				39.3	39.3	-1
3GHG.H	PRO	390	96.2	56	-0.16			4.5		64.4	59.9
3GHG.H	ARG	391	144.5	53.49	1.04	12.29		57.2	0.9	115.5	57.4	1
3GHG.H	LYS	392	68.9	29.25	1.03	10.43		36.6		59.7	23.1	1
3GHG.H	GLN	393	30.5	15.26	0.02					28.1	28.1
3GHG.H	CYS	394			0.05
3GHG.H	SER	395	1	0.69	-0.01					4.1	4.1
3GHG.H	LYS	396	56.6	24.05	1.03	9.87		28.4		73.8	45.4	1
3GHG.H	GLU	397	19.4	9.37	-0.99	6.23			26.1	34.1	8	-1
3GHG.H	ASP	398	1	0.57	-1.08	4.4			6.7	6.7		-1
3GHG.H	GLY	399	10.2	10.17	0.06					21.4	21.4
3GHG.H	GLY	400	0.5	0.49	0.06					2.4	2.4
3GHG.H	GLY	401			0.06
3GHG.H	TRP	402			0.02					4.3	4.3
3GHG.H	TRP	403			0.02					2.3	2.3
3GHG.H	TYR	404			0.03
3GHG.H	ASN	405	16.6	9.6	0.05					20.5	20.5
3GHG.H	ARG	406	90	33.33	1.04	12.15		35.2		83.1	47.9	1
3GHG.H	CYS	407	21.7	13.93	0.05				5.4	25	19.6
3GHG.H	HIS	408	3.4	1.55	0.98	8.18			8.9	15.2	6.3
3GHG.H	ALA	409			0.05
3GHG.H	ALA	410			0.05
3GHG.H	ASN	411			0.05
3GHG.H	PRO	412			-0.16
3GHG.H	ASN	413			0.05
3GHG.H	GLY	414			0.06
3GHG.H	ARG	415	22.4	8.28	1.04	13.9		3.6		48.1	44.4	1
3GHG.H	TYR	416	2.1	0.81	0.03	12.67	0.3			10.7	10.4
3GHG.H	TYR	417	1.7	0.66	0.03	13.04	4.4			11.9	7.5
3GHG.H	TRP	418	139.7	44.92	0.02		46.9			95	48.1
3GHG.H	GLY	419	32.7	32.56	0.06					29.1	29.1
3GHG.H	GLY	420			0.06
3GHG.H	GLN	421	121.4	60.76	0.02					91	91
3GHG.H	TYR	422	2.6	1	0.03					8.7	8.7
3GHG.H	THR	423	42.9	24.62	0		0.8		4	42.3	37.4
3GHG.H	TRP	424	163.9	52.68	0.02		88.6		0	118.8	30.2
3GHG.H	ASP	425	9	5.1	-1.08		1		10.5	15.2	3.6	-1
3GHG.H	MET	426	8.1	3.31	0		14.7			26.9	12.3
3GHG.H	ALA	427			0.05
3GHG.H	LYS	428	83.5	35.45	0.92	8.31		37.8		84.9	47.1	1
3GHG.H	HIS	429	81.7	37.16	0.03	4.88		7.5	14.6	82.6	60.4
3GHG.H	GLY	430	23.4	23.31	0.06					23.2	23.2
3GHG.H	THR	431	30.8	17.67	0				11.2	28.1	17
3GHG.H	ASP	432	16.4	9.27	-1.08				19.5	27.2	7.6	-1
3GHG.H	ASP	433			-1.08	3.31				2.9	2.9	-1
3GHG.H	GLY	434			0.06
3GHG.H	VAL	435			-0.06
3GHG.H	VAL	436			-0.06
3GHG.H	TRP	437			0.02
3GHG.H	MET	438	13.4	5.47	0				3.8	23.6	19.8
3GHG.H	ASN	439	29.5	17.1	0.05					25.8	25.8
3GHG.H	TRP	440	66.6	21.41	0.02					53.5	53.5
3GHG.H	LYS	441	63.4	26.92	1.03	10.22		23.2		58.3	35.1	1
3GHG.H	GLY	442	12.5	12.49	0.06					17.6	17.6
3GHG.H	SER	443	18.8	12.9	-0.01				9	24.8	15.8
3GHG.H	TRP	444	97.1	31.21	0.02		29.3			69.4	40.1
3GHG.H	TYR	445	22.1	8.37	0.03	10.41		7.4		31.7	24.4
3GHG.H	SER	446			-0.01
3GHG.H	MET	447			0
3GHG.H	ARG	448	85.3	31.57	1.04	12.22	1.3	24.3		62.6	37	1
3GHG.H	LYS	449	77.8	33.03	1.03	10.22		35.5		64.7	29.2	1
3GHG.H	MET	450			0
3GHG.H	SER	451	5.5	3.75	-0.01					15.1	15.1
3GHG.H	MET	452	0.8	0.33	0					6	6
3GHG.H	LYS	453	13.2	5.59	1.03	12.86				16.1	16.1	1
3GHG.H	ILE	454			-0.04
3GHG.H	ARG	455	37.8	14.01	1.04				2.7	48.9	46.2	1
3GHG.H	PRO	456	18	10.46	-0.16		10.7		0.7	26	14.6
3GHG.H	PHE	457	91.1	34.78	0.03		37	2.3	10.6	69.5	19.5
3GHG.H	PHE	458	202.9	77.44	0		47.1		9.8	129.1	72.2
3GHG.H	CA	501								7.6	7.6	2
3GHG.G	ALA	27	85.3	62.16	1.03	7.86		44.3	2.8	59.8	12.7	1
3GHG.G	CYS	28	46.6	29.88	0.05		17.5	3.1	0.6	49.6	28.4
3GHG.G	LYS	29	165.3	70.2	1.03	10.5		57.3		103.4	46.1	1
3GHG.G	ASP	30	103.6	58.67	-1.08	3.57		1.2	40.2	68.6	27.2	-1
3GHG.G	SER	31	91.1	62.5	-0.01				14.4	65.8	51.3
3GHG.G	ASP	32	90.4	51.15	-1.08	4.48			26	64.2	38.2	-1
3GHG.G	TRP	33	22.1	7.09	0.02		4.2			51.5	47.3
3GHG.G	PRO	34	93.1	54.2	-0.16					52.2	52.2
3GHG.G	PHE	35	145.6	55.55	0.03		58.5		5.2	105.1	41.4
3GHG.G	CYS	36	23.6	15.09	0.05				1.1	21.3	20.2
3GHG.G	SER	37	66.2	45.39	-0.01				9.1	44.9	35.7
3GHG.G	ASP	38	118.9	67.33	-1.08	4.06			36.5	72	35.5	-1
3GHG.G	GLU	39	126.4	60.93	-1.05	2.6			35.7	74.5	38.8	-1
3GHG.G	ASP	40	38.4	21.75	-1.08	2.25			22.9	28.8	5.9	-1
3GHG.G	TRP	41	52.6	16.9	0.02		33.3		3.7	58.5	21.4
3GHG.G	ASN	42	53.3	30.86	0.05				4	51.2	47.2
3GHG.G	TYR	43	84.7	32.05	0.03	11.07		3.1		89.3	86.2
3GHG.G	LYS	44	41.6	17.66	1.02	9.5		26		39.8	13.9	1
3GHG.G	CYS	45	2.6	1.69	0.05					8.4	8.4
3GHG.G	PRO	46	2	1.16	-0.16					4.1	4.1
3GHG.G	SER	47	18.5	12.72	-0.01					38.2	38.2
3GHG.G	GLY	48			0.06					6.7	6.7
3GHG.G	CYS	49	5	3.19	0.05		4.5			11.2	6.7
3GHG.G	ARG	50	19	7.03	1.03	10.34			7.3	42.2	34.9	1
3GHG.G	MET	51			0		2.8			2.8
3GHG.G	LYS	52	32.2	13.66	1.03	12.06		23		44	21	1
3GHG.G	GLY	53	4.3	4.27	0.06				1.2	12.4	11.1
3GHG.G	LEU	54	15.2	6.71	-0.03		15.8		6.4	27.9	5.7
3GHG.G	ILE	55			-0.04
3GHG.G	ASP	56	55.8	31.61	-1.08	1.86				40.6	40.6	-1
3GHG.G	GLU	57	88.6	42.74	-1.05	4.64			65.8	80.7	14.9	-1
3GHG.G	VAL	58	11	5.64	-0.06		3.1		2.4	20.5	15
3GHG.G	ASN	59	8.5	4.9	0.05					13.2	13.2
3GHG.G	GLN	60	108.1	54.08	0.02				11.6	79	67.4
3GHG.G	ASP	61	55	31.11	-1.08	4			42.1	57	14.9	-1
3GHG.G	PHE	62	1.1	0.44	0.03				1.7	3.5	1.8
3GHG.G	THR	63	62.6	35.9	0					53.3	53.3
3GHG.G	ASN	64	59.6	34.55	0.05				0.5	49.7	49.1
3GHG.G	ARG	65	31.5	11.67	1.04	11.59		1.8	0.5	54.3	52.1	1
3GHG.G	ILE	66	7	3.14	-0.04					14.9	14.9
3GHG.G	ASN	67	92.8	53.76	0.05					62.1	62.1
3GHG.G	LYS	68	132.7	56.34	1.03	10.29		38.7		101.6	62.8	1
3GHG.G	LEU	69	4.4	1.93	-0.03					21.5	21.5
3GHG.G	LYS	70	67.5	28.66	1.03	10.15	4.9			62.6	57.7	1
3GHG.G	ASN	71	89.7	51.97	0.05					64.7	64.7
3GHG.G	SER	72	30.7	21.07	-0.01					36.7	36.7
3GHG.G	LEU	73	1.3	0.56	-0.03		3.8			13.7	10
3GHG.G	PHE	74	112.9	43.06	0.03		58.1			81.7	23.6
3GHG.G	GLU	75	80.8	38.97	-1.05	4.07				55.5	55.5	-1
3GHG.G	TYR	76	45.7	17.28	0.03	11.18			0.2	52.1	51.9
3GHG.G	GLN	77	45.8	22.9	0.02					45.1	45.1
3GHG.G	LYS	78	115.3	48.96	1.03	9.94			4.4	91.1	86.7	1
3GHG.G	ASN	79	47.1	27.26	0.05			5.6	13.1	43	24.3
3GHG.G	ASN	80	12.7	7.33	0.05					27.7	27.7
3GHG.G	LYS	81	142.7	60.61	1.03	10.5		47.3	0.6	92.1	44.1	1
3GHG.G	ASP	82	81.6	46.22	-1.08	3.94			40.5	65.9	25.5	-1
3GHG.G	SER	83	23.9	16.4	-0.01					43.8	43.8
3GHG.G	HIS	84	114	51.84	0.12	6.43		0.2		78.9	78.7
3GHG.G	SER	85	50	34.31	-0.01					36.8	36.8
3GHG.G	LEU	86	89.5	39.43	-0.03		60.7			90.9	30.2
3GHG.G	THR	87	24	13.74	0		8.4			54.6	46.2
3GHG.G	THR	88	58.4	33.48	0		0.6			58.3	57.7
3GHG.G	ASN	89	75.3	43.6	0.05					62	62
3GHG.G	ILE	90	56.8	25.57	-0.04		53.1			74.4	21.3
3GHG.G	MET	91	89.3	36.53	0		47.2			76	28.9
3GHG.G	GLU	92	93.3	44.96	-1.05	4.13				64.5	64.5	-1
3GHG.G	ILE	93	104.1	46.84	-0.04		50.5		7.8	81.8	23.5
3GHG.G	LEU	94	31.8	14.01	-0.03		50.3		0.8	67.4	16.3
3GHG.G	ARG	95	141.1	52.24	1.04	12.36				102.1	102.1	1
3GHG.G	GLY	96	34.3	34.21	0.06				2.8	29.3	26.5
3GHG.G	ASP	97	76.1	43.08	-1.08	3.87	0.3		35.1	55	19.6	-1
3GHG.G	PHE	98	67.5	25.75	0.03		44.1	0.8		78.9	34
3GHG.G	SER	99	77	52.78	-0.01					56.8	56.8
3GHG.G	SER	100	46.3	31.76	-0.01			6.4	1.9	39.4	31.1
3GHG.G	ALA	101	37.7	27.46	0.05					35.4	35.4
3GHG.G	ASN	102	88.5	51.25	0.05					65	65
3GHG.G	ASN	103	98.1	56.82	0.05					62.7	62.7
3GHG.G	ARG	104	147	54.43	1.04	12.36		46.2		105.5	59.3	1
3GHG.G	ASP	105	60.2	34.09	-1.08	4.15				50.6	50.6	-1
3GHG.G	ASN	106	70.2	40.64	0.05			10.2		59.6	49.4
3GHG.G	THR	107	87	49.9	0					61.3	61.3
3GHG.G	TYR	108	34.3	12.97	0.02	9.71	23.6			51.3	27.7
3GHG.G	ASN	109	69.4	40.19	0.05			3.5		51	47.4
3GHG.G	ARG	110	170.7	63.19	1.04	12.5		35.7	0.3	105.3	69.3	1
3GHG.G	VAL	111	57.7	29.53	-0.06		24.2			50.1	25.8
3GHG.G	SER	112	5	3.46	-0.01					14.9	14.9
3GHG.G	GLU	113	90.7	43.75	-1.05	4.71			22.1	67.8	45.7	-1
3GHG.G	ASP	114	73.8	41.77	-1.08	3.24			43.7	49.2	5.5	-1
3GHG.G	LEU	115			-0.03					2.8	2.8
3GHG.G	ARG	116	79	29.24	1.04	12.36	4.5			79.7	75.1	1
3GHG.G	SER	117	46	31.52	-0.01				9.5	41.2	31.7
3GHG.G	ARG	118	99.3	36.78	1.04	11.8			1.5	89.3	87.8	1
3GHG.G	ILE	119	10.4	4.69	-0.04		10.7			29.6	18.9
3GHG.G	GLU	120	55.2	26.6	-1.05	4.35				65.3	65.3	-1
3GHG.G	VAL	121	83.4	42.69	-0.06					61	61
3GHG.G	LEU	122	16.2	7.16	-0.03					30.2	30.2
3GHG.G	LYS	123	26.9	11.41	0.98	8.68	18.5			28.8	10.3	1
3GHG.G	ARG	124	164.7	60.97	1.04	12.29				114.1	114.1	1
3GHG.G	LYS	125	94.1	39.98	1.03	10.5		51.5		82.1	30.6	1
3GHG.G	VAL	126			-0.06
3GHG.G	ILE	127	86.6	38.97	-0.04		45.1		1.7	67.8	21
3GHG.G	GLU	128	91.7	44.22	-1.05	3.91				59.9	59.9	-1
3GHG.G	LYS	129	18.3	7.78	1.03	9.73				28.2	28.2	1
3GHG.G	VAL	130	3.5	1.8	-0.06		1.5			17.6	16.1
3GHG.G	GLN	131	101	50.54	0.02		0.3			64.2	63.9
3GHG.G	HIS	132	57.3	26.07	0.21	6.75	9.8			52.4	42.6
3GHG.G	ILE	133	4.1	1.85	-0.04					15	15
3GHG.G	GLN	134	40	20	0.02					46.2	46.2
3GHG.G	LEU	135	97.2	42.83	-0.03		44.4			69.8	25.5
3GHG.G	LEU	136	4.7	2.07	-0.03		14.8			22.5	7.7
3GHG.G	GLN	137			0.02					12.8	12.8
3GHG.G	LYS	138	100.3	42.58	1.03	10.01		33.9		72.1	38.2	1
3GHG.G	ASN	139	26.1	15.09	0.05					26.4	26.4
3GHG.G	VAL	140			-0.06
3GHG.G	ARG	141	83.3	30.84	1.04	11.94		27.6		70	42.4	1
3GHG.G	ALA	142	46.2	33.63	0.05			1.4		36.6	35.3
3GHG.G	GLN	143	1.6	0.83	0.02					11.7	11.7
3GHG.G	LEU	144			-0.03
3GHG.G	VAL	145	27.9	14.28	-0.06		12.8			39.8	27
3GHG.G	ASP	146	48.4	27.42	-1.08	2.03				34.9	34.9	-1
3GHG.G	MET	147			0					1.8	1.8
3GHG.G	LYS	148	1.7	0.74	1.03	11.81				16.1	16.1	1
3GHG.G	ARG	149	41.4	15.34	1.04	11.35				50.8	50.8	1
3GHG.G	LEU	150			-0.03					8.9	8.9
3GHG.G	GLU	151	4.6	2.23	-1.05	3.13				13.8	13.8	-1
3GHG.G	VAL	152	4.9	2.51	-0.06		9.2			17	7.8
3GHG.G	ASP	153	5.8	3.27	-1.08					9.9	9.9	-1
3GHG.G	ILE	154			-0.04
3GHG.G	ASP	155	2	1.13	-1.08					9.4	9.4	-1
3GHG.G	ILE	156	5.5	2.47	-0.04		1.6			21.8	20.2
3GHG.G	LYS	157	11.4	4.82	1.03	12.91		10.7	0.3	34.2	23.2	1
3GHG.G	ILE	158			-0.04					6	6
3GHG.G	ARG	159	21.2	7.84	1.04	12.85				50.7	50.7	1
3GHG.G	SER	160			-0.01					5.5	5.5
3GHG.G	CYS	161			0.05
3GHG.G	ARG	162	137.9	51.08	1.04	13.52				101.9	101.9	1
3GHG.G	GLY	163	5.8	5.79	0.06					12.4	12.4
3GHG.G	SER	164	1	0.67	-0.01				1	9.8	8.8
3GHG.G	CYS	165	1.2	0.77	0.05					7.3	7.3
3GHG.G	SER	166	45.9	31.48	-0.01					36.5	36.5
3GHG.G	ARG	167	125.9	46.61	1.04	12.01		31.6		90.1	58.5	1
3GHG.G	ALA	168	15	10.91	0.05					25.4	25.4
3GHG.G	LEU	169	38.3	16.86	-0.03			2.8		38.9	36.1
3GHG.G	ALA	170	101.6	73.98	0.05			3.8	10.5	63.2	48.9
3GHG.G	ARG	171	21.7	8.05	1.04	13.36			1.6	44.7	43.1	1
3GHG.G	GLU	172	152.7	73.61	-1.05	4.63			35.9	95.5	59.6	-1
3GHG.G	VAL	173	34.1	17.45	-0.06		9.6			53.8	44.2
3GHG.G	ASP	174	55.9	31.67	-1.08	3.07			18.7	51	32.3	-1
3GHG.G	LEU	175	92.6	40.8	-0.03		59.4			85.3	25.8
3GHG.G	LYS	176	151.2	64.23	1.03	10.5	9.2	34.4	1.3	97.3	52.4	1
3GHG.G	ASP	177	30.2	17.1	-1.08	2.88			28.7	30.5	1.8	-1
3GHG.G	TYR	178	0.8	0.32	0.03					3.3	3.3
3GHG.G	GLU	179	56	27.01	-1.05	3.98			25.8	55.4	29.5	-1
3GHG.G	ASP	180	50	28.33	-1.08	4.29			26.1	47.6	21.5	-1
3GHG.G	GLN	181	16.4	8.23	0.02				0.5	19.2	18.8
3GHG.G	GLN	182	31.1	15.55	0.02				3	39.4	36.4
3GHG.G	LYS	183	157.7	66.97	1.03	10.5		53.1		104.4	51.4	1
3GHG.G	GLN	184	53.1	26.58	0.02			10.7		55.4	44.8
3GHG.G	LEU	185			-0.03					0.3	0.3
3GHG.G	GLU	186	82.5	39.76	-1.05	4.21				64.4	64.4	-1
3GHG.G	GLN	187	120	60.04	0.02			9.1		82.4	73.3
3GHG.G	VAL	188	27.3	13.96	-0.06					32.7	32.7
3GHG.G	ILE	189	6.6	2.96	-0.04					8.9	8.9
3GHG.G	ALA	190	75.5	54.97	0.05					60.3	60.3
3GHG.G	LYS	191	140.6	59.69	1.03	10.36				97.4	97.4	1
3GHG.G	ASP	192	38.9	22.05	-1.08	3.6				62.3	62.3	-1
3GHG.G	LEU	193	88.1	38.84	-0.03		42.9		7.7	78.8	28.2
3GHG.G	LEU	194	11.4	5.02	-0.03		7.5		11.3	37.8	19
3GHG.G	PRO	195	68.8	40.06	-0.16		11.1		3.1	47.7	33.5
3GHG.G	SER	196	86.7	59.46	-0.01			6.6		55.2	48.6
3GHG.G	ARG	197	113.1	41.87	1.04	12.29	1.3	46.3	8	98.1	42.4	1
3GHG.G	ASP	198	111.2	62.93	-1.08	4.25			27.4	70.8	43.4	-1
3GHG.G	ARG	199	229.1	84.84	1.04	12.5		52.9	1.2	139.4	85.3	1
3GHG.G	GLN	200	111.1	55.58	0		1.8		17	103.6	84.7
3GHG.F	ARG	14	201.2	74.49	2.07	10.04		101.8		140.4	38.6	2
3GHG.F	PHE	15	10.2	3.9	0.03			10.3		31.4	21.2
3GHG.F	GLY	16	58.9	58.74	0.06			7.6		37.6	30.1
3GHG.F	SER	17	103.5	70.99	-0.01					60.6	60.6
3GHG.F	TYR	18	110.7	41.9	0.03	10		0.4		86.1	85.7
3GHG.F	CYS	19	7.5	4.81	0.05					8	8
3GHG.F	PRO	20	4.8	2.82	-0.16					0.9	0.9
3GHG.F	THR	21	6.9	3.96	0					3.9	3.9
3GHG.F	THR	22	16.5	9.46	0
3GHG.F	CYS	23	0.8	0.52	0.05					4.6	4.6
3GHG.F	GLY	24			0.06					3.3	3.3
3GHG.F	ILE	25			-0.04
3GHG.F	ALA	26	9.7	7.09	0.05		6.6			18.9	12.4
3GHG.F	ASP	27	46.9	26.56	-1.08	4.15			28.8	46.7	17.9	-1
3GHG.F	PHE	28	19.9	7.58	0.03			7.9		40.9	33
3GHG.F	LEU	29	8.3	3.64	-0.03		5		1.2	28.1	21.8
3GHG.F	SER	30	76.9	52.7	-0.01					48.5	48.5
3GHG.F	THR	31	67.6	38.74	0			3.1		44.4	41.3
3GHG.F	TYR	32	0.4	0.15	0.03	10.63				10.7	10.7
3GHG.F	GLN	33	62.2	31.13	0.02					48.9	48.9
3GHG.F	THR	34	83.4	47.8	0					57.1	57.1
3GHG.F	LYS	35	95.5	40.56	1.03	10.08		39.2		92.7	53.5	1
3GHG.F	VAL	36	9.1	4.67	-0.06					28	28
3GHG.F	ASP	37	18.3	10.36	-1.08	3.25				15	15	-1
3GHG.F	LYS	38	163.6	69.49	1.03	10.5		50.4		107.3	57	1
3GHG.F	ASP	39	46.9	26.52	-1.08	4.03			23.4	44.8	21.4	-1
3GHG.F	LEU	40			-0.03
3GHG.F	GLN	41	88	44.06	0.02				3.1	66.1	63
3GHG.F	SER	42	61.7	42.28	-0.01				3.5	49.4	45.9
3GHG.F	LEU	43	5.6	2.46	-0.03				4.8	10.4	5.6
3GHG.F	GLU	44	57.4	27.69	-1.05	4.28			40.9	56.5	15.6	-1
3GHG.F	ASP	45	73.5	41.58	-1.08	3.94			33.1	48.8	15.7	-1
3GHG.F	ILE	46	48.3	21.74	-0.04		2.5			47.9	45.4
3GHG.F	LEU	47	13.4	5.92	-0.03		12.3			51.5	39.1
3GHG.F	HIS	48	120.3	54.7	0.38	7.13			4.7	105.7	100.9
3GHG.F	GLN	49	97.8	48.96	0.02			0.4		69.1	68.7
3GHG.F	VAL	50	13.2	6.73	-0.06		13.1	1.6		36.7	21.9
3GHG.F	GLU	51	97.6	47.04	-1.05	4.57			39.3	62.6	23.2	-1
3GHG.F	ASN	52	125.7	72.77	0.05				9.1	82.8	73.7
3GHG.F	LYS	53	118.2	50.21	1.03	10.43		36.2		82.9	46.7	1
3GHG.F	THR	54	12.4	7.11	0				3.2	25.6	22.4
3GHG.F	SER	55	20.3	13.93	-0.01				7	30.8	23.8
3GHG.F	GLU	56	80	38.59	-1.05	4.5			39	79.3	40.3	-1
3GHG.F	VAL	57	6.5	3.33	-0.06		0.3			37.5	37.1
3GHG.F	LYS	58	122.8	52.15	1.03	10.5		49.7		102.6	52.9	1
3GHG.F	GLN	59	134.3	67.21	0.02				12.7	90	77.3
3GHG.F	LEU	60	32.9	14.51	-0.03		7.9	1.6	2.3	48.8	37
3GHG.F	ILE	61	5.9	2.68	-0.04		10.8	0.4		29.1	18
[truncated: 1,869 more rows]
