# Supplementary material for: Methacrylate Coatings for Titanium Surfaces to Optimize Biocompatibility
Source: Micromachines (Basel). 2020 Jan 13;11(1):87. doi: 10.3390/mi11010087 (PMC7019220; doi:10.3390/mi11010087)
Supplement: Supplementary file 1 [file micromachines-11-00087-s001.zip › S4.csv]

Chain	Res	UID	res_ASA	res_exp	res_charge	propKa	res_hyd	res_pos	res_neg	res_tot	res_oth	ens_res_charge	ens_sc_pKa	ens_bb_pKa
3M7P.A	GLN	297	153.6	76.86	1.74	7.86		37		95	58	1
3M7P.A	PRO	298	131.4	76.49	-0.18			2.8		74.6	71.8
3M7P.A	HIS	299	94.4	42.94	0.1	6.43		29.4		73.5	44.1
3M7P.A	PRO	300	21	12.23	-0.18					39.9	39.9
3M7P.A	GLN	301	136.3	68.19	0					87.4	87.4
3M7P.A	PRO	302	69	40.18	-0.18		9.6			46.6	37
3M7P.A	PRO	303	50.2	29.26	-0.18		7.7			39.7	32.1
3M7P.A	PRO	304	18.3	10.68	-0.18					19.7	19.7
3M7P.A	TYR	305	189.7	71.76	0	10	49	0.2		106.7	57.5
3M7P.A	GLY	306	33.7	33.62	0.03			10.1		29.3	19.2
3M7P.A	HIS	307	59.6	27.12	0.18	6.73		24		46.4	22.4
3M7P.A	CYS	308	5.3	3.41	0.03					10.6	10.6
3M7P.A	VAL	309	98.1	50.2	-0.08			1.2		67.6	66.5
3M7P.A	THR	310	11.5	6.57	-0.02					26.2	26.2
3M7P.A	ASP	311	145.9	82.6	-1.1	2.52				86.1	86.1	-1
3M7P.A	SER	312	100.1	68.64	-0.03					65	65
3M7P.A	GLY	313	29.8	29.74	0.03					29.9	29.9
3M7P.A	VAL	314	39.1	20.03	-0.08					36.5	36.5
3M7P.A	VAL	315			-0.08					8.8	8.8
3M7P.A	TYR	316	11.1	4.19	0.01	10.49				16.6	16.6
3M7P.A	SER	317			-0.03
3M7P.A	VAL	318	40.3	20.63	-0.08					40.5	40.5
3M7P.A	GLY	319	27.2	27.07	0.03					29.3	29.3
3M7P.A	MET	320			-0.02					7	7
3M7P.A	GLN	321	40.5	20.27	0					38.1	38.1
3M7P.A	TRP	322	8.7	2.8	0					22.5	22.5
3M7P.A	LEU	323	22.3	9.81	-0.04					28.6	28.6
3M7P.A	LYS	324	74.5	31.62	1.01	10.29				75.6	75.6	1
3M7P.A	THR	325	69.7	39.96	-0.02		3			58	55
3M7P.A	GLN	326	99.8	49.94	0					71	71
3M7P.A	GLY	327	57.2	57	0.03			4.7		43.6	38.9
3M7P.A	ASN	328	39.3	22.76	0.03			15.4		44.8	29.4
3M7P.A	LYS	329	139.5	59.24	1.01	10.43		47.7		87.7	39.9	1
3M7P.A	GLN	330	37.3	18.66	0					48.7	48.7
3M7P.A	MET	331	55.6	22.74	-0.02					47.1	47.1
3M7P.A	LEU	332	12.2	5.39	-0.04					22.6	22.6
3M7P.A	CYS	333			-0.61	7.11
3M7P.A	THR	334	19.5	11.18	-0.02					27.1	27.1
3M7P.A	CYS	335			0.03					0.7	0.7
3M7P.A	LEU	336	80	35.25	-0.04					60.8	60.8
3M7P.A	GLY	337	70.3	70.08	0.03					45.4	45.4
3M7P.A	ASN	338	165	95.55	0.03					89.4	89.4
3M7P.A	GLY	339	23.8	23.72	0.03					26.7	26.7
3M7P.A	VAL	340	64	32.77	-0.08					58.3	58.3
3M7P.A	SER	341	40.1	27.5	-0.03					31.6	31.6
3M7P.A	CYS	342	48.9	31.35	0.05	10.67				41.1	41.1
3M7P.A	GLN	343	107.4	53.72	0					74.6	74.6
3M7P.A	GLU	344	82.1	39.59	-1.08	3.83			25.2	66.3	41.1	-1
3M7P.A	THR	345			-0.02					7.7	7.7
3M7P.A	ALA	346	28.7	20.93	0.03					34.5	34.5
3M7P.A	VAL	347	1.5	0.75	-0.08					7.3	7.3
3M7P.A	THR	348	72	41.27	-0.02					56.5	56.5
3M7P.A	GLN	349	86.5	43.26	0					75	75
3M7P.A	THR	350	18.7	10.74	-0.02					23.9	23.9
3M7P.A	TYR	351	110.6	41.86	0	10	40.8			86.4	45.6
3M7P.A	GLY	352	38.3	38.2	0.03		0.2			29.8	29.6
3M7P.A	GLY	353	17.5	17.45	0.03					24.4	24.4
3M7P.A	ASN	354	73.1	42.34	0.03			11.9		55.1	43.2
3M7P.A	SER	355	2	1.38	-0.03				0.8	6.7	5.8
3M7P.A	ASN	356	152.1	88.1	0.03				27.6	91.8	64.1
3M7P.A	GLY	357	26.2	26.17	0.03				9.7	23.5	13.8
3M7P.A	GLU	358	80.1	38.64	-1.08	4.75			38.7	60.9	22.2	-1
3M7P.A	PRO	359	53.6	31.23	-0.18				0.1	41.9	41.8
3M7P.A	CYS	360			0.03
3M7P.A	VAL	361	6.5	3.35	-0.08				3.8	19.1	15.3
3M7P.A	LEU	362	6.1	2.69	-0.04					21.5	21.5
3M7P.A	PRO	363	21.1	12.29	-0.18					31.2	31.2
3M7P.A	PHE	364	0.8	0.31	0.01					6.1	6.1
3M7P.A	THR	365	44.1	25.31	-0.02					41.7	41.7
3M7P.A	TYR	366	30	11.34	0.01	12.14				36.4	36.4
3M7P.A	ASN	367	49.7	28.81	0.03					54.1	54.1
3M7P.A	GLY	368	31.9	31.76	0.03					27.8	27.8
3M7P.A	ARG	369	7.3	2.71	1.01	11.83				24.9	24.9	1
3M7P.A	THR	370	21.1	12.09	-0.02					37.3	37.3
3M7P.A	PHE	371	18.2	6.93	0.01					19.2	19.2
3M7P.A	TYR	372	53	20.05	0	10.37	20.7			61.6	40.9
3M7P.A	SER	373	72.4	49.62	-0.03					47.5	47.5
3M7P.A	CYS	374	18.2	11.64	0.03		4.4			26.2	21.8
3M7P.A	THR	375	16	9.18	-0.02					16.7	16.7
3M7P.A	THR	376	55.3	31.71	-0.02		0.9			46.5	45.5
3M7P.A	GLU	377	28.7	13.82	-1.08	2.9		1.9		40	38.2	-1
3M7P.A	GLY	378	29.4	29.28	0.03					33.2	33.2
3M7P.A	ARG	379	80.3	29.73	1.01	12.08				78.9	78.9	1
3M7P.A	GLN	380	144	72.05	0					99.9	99.9
3M7P.A	ASP	381	81.5	46.11	-1.1	2.33		10.6		53.6	43	-1
3M7P.A	GLY	382	48.6	48.41	0.03					35.6	35.6
3M7P.A	HIS	383	91.7	41.69	0.1	6.43	1	26.2		60.2	33
3M7P.A	LEU	384	87	38.32	-0.04		43.8			71	27.2
3M7P.A	TRP	385	7.8	2.49	0					16.2	16.2
3M7P.A	CYS	386			0.03
3M7P.A	SER	387			-0.03
3M7P.A	THR	388	10.5	6.02	-0.02				12.6	13	0.4
3M7P.A	THR	389	36.4	20.86	-0.02				3.6	37	33.4
3M7P.A	SER	390	48.2	33.07	-0.03				12	44.8	32.8
3M7P.A	ASN	391	56.8	32.9	0.03				1.3	48.9	47.5
3M7P.A	TYR	392	29.8	11.26	0	10.13				28	28
3M7P.A	GLU	393	94.7	45.65	-1.08	3.3			21.7	67.5	45.8	-1
3M7P.A	GLN	394	151.7	75.9	0				28.1	93.4	65.4
3M7P.A	ASP	395	55	31.16	-1.1	3.32			26.4	48	21.6	-1
3M7P.A	GLN	396	84.9	42.48	0				13.9	55.4	41.4
3M7P.A	LYS	397	83.7	35.55	1.01	10.29		28.4	0.5	61.6	32.7	1
3M7P.A	TYR	398	42.4	16.05	-0.03	8.82		7.7		33.2	25.5
3M7P.A	SER	399			-0.03
3M7P.A	PHE	400	26.5	10.1	0.01		15.5			26.1	10.6
3M7P.A	CYS	401	6.4	4.11	0.03		1.5			14	12.5
3M7P.A	THR	402	61.3	35.12	-0.02		7			52.3	45.3
3M7P.A	ASP	403	154.7	87.56	-1.1	3.8			41.3	94.4	53.1	-1
3M7P.A	HIS	404	51.6	23.48	0.11	6.49			4.1	74.7	70.7
3M7P.A	THR	405	6.5	3.72	-0.02					14.3	14.3
3M7P.A	VAL	406	73.3	37.51	-0.08		29.6			74	44.4
3M7P.A	LEU	407	42.1	18.57	-0.04					55.2	55.2
3M7P.A	VAL	408	19.3	9.87	-0.08		16.9		0.3	39.4	22.2
3M7P.A	GLN	409	71.2	35.61	0					69.9	69.9
3M7P.A	THR	410			-0.02					2	2
3M7P.A	ARG	411	154.3	57.13	1.01	12.43		48.5		115.9	67.4	1
3M7P.A	GLY	412	51.6	51.42	0.03					36.7	36.7
3M7P.A	GLY	413	39.6	39.46	0.03		0.2			31.6	31.4
3M7P.A	ASN	414	50.3	29.12	0.03					60.6	60.6
3M7P.A	SER	415			-0.03					4.4	4.4
3M7P.A	ASN	416	72.7	42.1	0.03					66.8	66.8
3M7P.A	GLY	417	20.6	20.49	0.03					22.7	22.7
3M7P.A	ALA	418			0.03
3M7P.A	LEU	419			-0.04					9.8	9.8
3M7P.A	CYS	420	8	5.15	0.03					10.4	10.4
3M7P.A	HIS	421	36	16.36	0	4.24				39	39
3M7P.A	PHE	422	49.4	18.86	0.01		18.5		0.1	66.5	48
3M7P.A	PRO	423	58	33.77	-0.18					43.6	43.6
3M7P.A	PHE	424			0.01
3M7P.A	LEU	425	30.7	13.54	-0.04					36.1	36.1
3M7P.A	TYR	426	27.3	10.35	0	9.95	6.3		0.6	26.4	19.5
3M7P.A	ASN	427	111.7	64.71	0.03				10	77.3	67.2
3M7P.A	ASN	428	143.4	83.08	0.03					75.6	75.6
3M7P.A	HIS	429	123.3	56.06	0.09	6.36				74.7	74.7
3M7P.A	ASN	430	72.6	42.06	0.03					53.9	53.9
3M7P.A	TYR	431	40.5	15.31	0.01	11.41				41.1	41.1
3M7P.A	THR	432	66.8	38.27	-0.02				2.8	60.9	58.1
3M7P.A	ASP	433	64.8	36.66	-1.1	3.01	0.2		29.8	54.4	24.5	-1
3M7P.A	CYS	434	11.5	7.39	0.03		3.6			15.4	11.8
3M7P.A	THR	435	10.1	5.78	-0.02			0.8		11.8	11
3M7P.A	SER	436	23	15.8	-0.03			2.8		32.6	29.8
3M7P.A	GLU	437	102.7	49.49	-1.08	4.5			34.4	64.2	29.8	-1
3M7P.A	GLY	438	60.8	60.64	0.03					40.9	40.9
3M7P.A	ARG	439	79.5	29.42	1.01	12.01	0.2			81.6	81.4	1
3M7P.A	ARG	440	265.5	98.3	1.01	12.5		54.6		148.8	94.2	1
3M7P.A	ASP	441	86.4	48.91	-1.1	2.09				56.4	56.4	-1
3M7P.A	ASN	442	104.8	60.69	0.03					63.8	63.8
3M7P.A	MET	443	100.9	41.26	-0.02		40.6			69.6	29
3M7P.A	LYS	444	110.8	47.06	1.01	10.36	8.8	34.7		84.8	41.3	1
3M7P.A	TRP	445	11.5	3.7	0		14.6			15.1	0.6
3M7P.A	CYS	446			0.03
3M7P.A	GLY	447			0.03
3M7P.A	THR	448			-0.02
3M7P.A	THR	449	3.7	2.1	-0.02					7.4	7.4
3M7P.A	GLN	450	101.5	50.8	0					71.8	71.8
3M7P.A	ASN	451	37.4	21.66	0.03					40.8	40.8
3M7P.A	TYR	452	29.9	11.33	0	9.61	13.9			32.8	18.9
3M7P.A	ASP	453	52.2	29.55	-1.1	2.34			26	51.3	25.3	-1
3M7P.A	ALA	454	52.5	38.27	0.03				7.6	44	36.3
3M7P.A	ASP	455	15.5	8.77	-1.1	3.85				15.6	15.6	-1
3M7P.A	GLN	456	93.8	46.93	0				8.6	62.5	53.9
3M7P.A	LYS	457	1.1	0.46	1.01	10.01				22.5	22.5	1
3M7P.A	PHE	458	40	15.25	0.01		21.1			34.5	13.4
3M7P.A	GLY	459			0.03
3M7P.A	PHE	460	50	19.1	0.01		21.8			47.3	25.6
3M7P.A	CYS	461	20.2	12.95	0.03		4.2			27.3	23
3M7P.A	PRO	462	55.4	32.24	-0.18					59.9	59.9
3M7P.A	MET	463	169	69.09	-0.02		53.5	3.8		117.1	59.9
3M7P.A	ALA	464	85.7	62.4	0.03					59.4	59.4
3M7P.A	ALA	465	96.9	70.61	0.03					69.4	69.4
3M7P.A	HIS	466	74.7	33.96	0.15	6.64		16.2		68.3	52.2
3M7P.A	GLU	467	45.7	22.04	-1.07	5.19				44	44	-1
3M7P.A	GLU	468	101.4	48.89	-1.08	4.57	0.4	6.3		71.7	64.9	-1
3M7P.A	ILE	469	90.8	40.86	-0.06		46.8			72.6	25.8
3M7P.A	CYS	470			0.03					1.7	1.7
3M7P.A	THR	471	38.5	22.09	-0.02					38.8	38.8
3M7P.A	THR	472			-0.02					9	9
3M7P.A	ASN	473	30.7	17.78	0.03			0.3		47.6	47.4
3M7P.A	GLU	474	54.8	26.44	-1.08	4.38		2.9		45.4	42.5	-1
3M7P.A	GLY	475	51.9	51.72	0.03					34.9	34.9
3M7P.A	VAL	476	69.9	35.75	-0.08					51.4	51.4
3M7P.A	MET	477	128.3	52.47	-0.02		48.8			86.8	38.1
3M7P.A	TYR	478	46.2	17.5	0	10.07				47.4	47.4
3M7P.A	ARG	479	183.5	67.94	1.01	12.5		42.9		111.1	68.2	1
3M7P.A	ILE	480	64.5	29.04	-0.06			7.3		55.4	48.1
3M7P.A	GLY	481	51.7	51.5	0.03					37	37
3M7P.A	ASP	482	49.8	28.18	-1.1	2.96				35.3	35.3	-1
3M7P.A	GLN	483	98.2	49.16	0			13.1		70	56.9
3M7P.A	TRP	484	22	7.08	0			1		24.1	23
3M7P.A	ASP	485	90.1	51.03	-1.1	3.22			4.5	61.9	57.4	-1
3M7P.A	LYS	486	13.5	5.75	1.01	12.86			9	28.3	19.2	1
3M7P.A	GLN	487	106.5	53.3	0			8.8	8.9	84.3	66.5
3M7P.A	HIS	488	102	46.37	0.17	6.69		19.7		81.9	62.1
3M7P.A	ASP	489	55.8	31.6	-1.1	3.59			33.7	46.3	12.6	-1
3M7P.A	MET	490	88.7	36.27	-0.02					77.7	77.7
3M7P.A	GLY	491	86.4	86.14	0.03				8.1	49.5	41.3
3M7P.A	HIS	492	52.2	23.73	0.11	6.5				60.1	60.1
3M7P.A	MET	493	152.9	62.5	-0.02		54		2.7	103.9	47.2
3M7P.A	MET	494			-0.02					6	6
3M7P.A	ARG	495	104.4	38.66	1.01	11.52	1.4	22.4		87.5	63.7	1
3M7P.A	CYS	496			0.05	12.64
3M7P.A	THR	497	31.6	18.1	-0.02					31.6	31.6
3M7P.A	CYS	498			0.03					0.2	0.2
3M7P.A	VAL	499	71.6	36.63	-0.08					55.2	55.2
3M7P.A	GLY	500	1.4	1.37	0.03					4.1	4.1
3M7P.A	ASN	501	96.1	55.65	0.03					72.8	72.8
3M7P.A	GLY	502	38.9	38.77	0.03					31.1	31.1
3M7P.A	ARG	503	12.8	4.74	1	9.75				39.5	39.5	1
3M7P.A	GLY	504	1.3	1.34	0.03					7.6	7.6
3M7P.A	GLU	505	20.2	9.72	-1.08	4.56				20.8	20.8	-1
3M7P.A	TRP	506	3.4	1.11	0					8.8	8.8
3M7P.A	THR	507	16.2	9.27	-0.02		1.1		1.5	22.7	20.1
3M7P.A	CYS	508			-0.72	6.86
3M7P.A	ILE	509	46.8	21.06	-0.06		37.7			48.9	11.2
3M7P.A	ALA	510	1.2	0.88	0.03					8.8	8.8
3M7P.A	TYR	511	142.9	54.07	0	10	46.1			104	57.9
3M7P.A	SER	512	33.7	23.14	-0.03					32.9	32.9
3M7P.A	GLN	513	134.2	67.14	0		2.2			89.1	86.9
3M7P.A	LEU	514	137.8	60.72	-0.04		51.2		11	89	26.8
3M7P.A	ARG	515	232.1	85.94	1.01	12.5		47.7		141.9	94.2	1
3M7P.A	ASP	516	95.3	53.95	-1.1	3.07			27	61.9	34.9	-1
3M7P.A	GLN	517	36	18	0		0.4			39.1	38.7
3M7P.A	CYS	518	11.2	7.15	-0.36	7.54	11.4			14.9	3.5
3M7P.A	ILE	519	55.3	24.87	-0.06		40.4			50.5	10.1
3M7P.A	VAL	520	16.1	8.22	-0.08		17		0.5	22.5	5
3M7P.A	ASP	521	4.8	2.7	-1.1	5				12.1	12.1	-1
3M7P.A	ASP	522	20.4	11.55	-1.1	1.42			24.1	28.6	4.4	-1
3M7P.A	ILE	523			-0.06					7	7
3M7P.A	THR	524	16.7	9.58	-0.02				4.7	33.4	28.7
3M7P.A	TYR	525	0.9	0.33	0.01					11.5	11.5
3M7P.A	ASN	526	0.9	0.52	0.03					8	8
3M7P.A	VAL	527	15.8	8.07	-0.08					35.2	35.2
3M7P.A	ASN	528	85.7	49.63	0.03			6.4		51.2	44.9
3M7P.A	ASP	529	74.5	42.19	-1.1	2.25				55.8	55.8	-1
3M7P.A	THR	530	111	63.64	-0.02					76.3	76.3
3M7P.A	PHE	531	80.9	30.87	0.01		46.7			73.5	26.8
3M7P.A	HIS	532	7.5	3.41	0	1.87	1.2			25.5	24.3
3M7P.A	LYS	533	78.7	33.44	1.01	10.29		1.6		99.4	97.9	1
3M7P.A	ARG	534	42.6	15.78	1.01	13.61		30.7		49.7	19	1
3M7P.A	HIS	535	1.1	0.49	-0.03					10.4	10.4
3M7P.A	GLU	536			0	9.24				4	4	-1
3M7P.A	GLU	537	24.5	11.83	-0.03	8.74		1.3		20.3	19	-1
3M7P.A	GLY	538			0.03
3M7P.A	HIS	539	38.6	17.57	1.09	10.12		7.2	9.4	33.1	16.5
3M7P.A	MET	540	11.2	4.58	-0.02		12.7			33.7	21
3M7P.A	LEU	541	64.1	28.23	-0.04		52.6		1.1	61.5	7.7
3M7P.A	ASN	542	35	20.28	0.03		0.9			34.4	33.5
3M7P.A	CYS	543	1.2	0.77	-0.41	7.46	3.5			3.5
3M7P.A	THR	544	53.9	30.9	-0.02					41.8	41.8
3M7P.A	CYS	545	72.6	46.52	-0.02	10.6	7.3	11.9		56.1	36.9
3M7P.A	TRP	553	193.3	62.14	1.77	7.93	58.4	47.9		132.3	26	1
3M7P.A	LYS	554	143.8	61.05	1.01	10.36		0.6		99.5	98.9	1
3M7P.A	CYS	555	69.6	44.59	0.05	10.67	18.7			62.2	43.4
3M7P.A	ASP	556	53	30.01	-1.1	3.19				41.6	41.6	-1
3M7P.A	PRO	557	105.6	61.49	-0.18				13.5	83.3	69.9
3M7P.A	VAL	558	17.3	8.83	-0.08		9			26.8	17.8
3M7P.A	ASP	559	84.7	47.95	-1.1	3.75			29.6	62	32.3	-1
3M7P.A	GLN	560	72.1	36.09	0					53	53
3M7P.A	CYS	561			0.03					2.6	2.6
3M7P.A	GLN	562	25.1	12.56	0					47.8	47.8
3M7P.A	ASP	563			-1.1							-1
3M7P.A	SER	564			-0.03					14.4	14.4
3M7P.A	GLU	565	31.6	15.24	-1.08	2.25				40.9	40.9	-1
3M7P.A	THR	566	62.7	35.96	-0.02					49.1	49.1
3M7P.A	GLY	567	19.5	19.42	0.03					23.4	23.4
3M7P.A	THR	568	74.3	42.62	-0.02					47.5	47.5
3M7P.A	PHE	569	108.8	41.52	0.01		37.8			86.8	49
3M7P.A	TYR	570	43.3	16.37	0.01	10.41				40.8	40.8
3M7P.A	GLN	571	104.3	52.18	0				3.6	68.3	64.7
3M7P.A	ILE	572	97.6	43.9	-0.06				10.8	72.2	61.3
3M7P.A	GLY	573	43.8	43.68	0.03				9.8	29	19.2
3M7P.A	ASP	574	54.4	30.77	-1.1	3.01			28.7	38.2	9.5	-1
3M7P.A	SER	575	88.2	60.45	-0.03					54.8	54.8
3M7P.A	TRP	576	20.4	6.55	0					23.2	23.2
3M7P.A	GLU	577	113.9	54.93	-1.08	4.57			37.5	86.6	49	-1
3M7P.A	LYS	578	10.9	4.62	1.01					15.4	15.4	1
3M7P.A	TYR	579	186.6	70.6	0	10.07	51.5	5.8		113.3	56
3M7P.A	VAL	580	23.3	11.94	-0.08			0.3		43.7	43.4
3M7P.A	HIS	581	109.2	49.66	0.39	7.21		48.9		106.6	57.7
3M7P.A	GLY	582	68.8	68.61	0.03			4.2		45.6	41.4
3M7P.A	VAL	583	40	20.49	-0.08					41.4	41.4
3M7P.A	ARG	584	70.1	25.95	1.01	12.22	7.2	37.8		69.7	24.7	1
3M7P.A	TYR	585	0.6	0.24	-0.01	9.27				12.2	12.2
3M7P.A	GLN	586	81.2	40.62	0				14.5	64.5	49.9
3M7P.A	CYS	587	0.5	0.33	0.02	8.88				9.6	9.6
3M7P.A	TYR	588	90.4	34.19	0	9.84				67.8	67.8
3M7P.A	CYS	589			0.03
3M7P.A	TYR	590	56.8	21.51	0	9.47				56.4	56.4
3M7P.A	GLY	591			0.03
3M7P.A	ARG	592	72.5	26.84	1.01					88.2	88.2	1
3M7P.A	GLY	593	16.3	16.29	0.03				0.1	24.1	24.1
3M7P.A	ILE	594	56.4	25.37	-0.06		32.9	1.3		50.4	16.2
3M7P.A	GLY	595			0.03
3M7P.A	GLU	596	13.6	6.57	-1.08			0.3		8.8	8.5	-1
3M7P.A	TRP	597	1.1	0.36	0					10.1	10.1
3M7P.A	HIS	598	10.1	4.6	0.07	6.24				16.7	16.7
3M7P.A	CYS	599	1.9	1.24	0.05					2.9	2.9
3M7P.A	GLN	600	33.7	16.88	0					47.8	47.8
3M7P.A	PRO	601	27.6	16.07	-0.18					34	34
3M7P.A	LEU	602	54.2	23.89	-0.04		15.5		2.9	52.4	33.9
3M7P.A	GLN	603	124.2	62.14	0			0.7		102.3	101.5
3M7P.A	THR	604	181.5	104.05	-0.03			8.6		103.5	94.9
3M7P.A	ZN	953								1.8	1.8	2
3M7P.A	ZN	954								4.3	4.3	2
3M7P.A	ZN	956						27.2		27.2		2
3M7P.A	ZN	957						16.2		16.2		2
3M7P.A	ZN	958						18.8		18.8		2
3M7P.A	ZN	959						2.2		2.2		2
3M7P.A	ZN	955						26.6		26.6		2
