# Supplementary material for: Methacrylate Coatings for Titanium Surfaces to Optimize Biocompatibility
Source: Micromachines (Basel). 2020 Jan 13;11(1):87. doi: 10.3390/mi11010087 (PMC7019220; doi:10.3390/mi11010087)
Supplement: Supplementary file 1 [file micromachines-11-00087-s001.zip › S5.csv]

Chain	Res	UID	res_ASA	res_exp	res_charge	propKa	res_hyd	res_pos	res_neg	res_tot	res_oth	ens_res_charge	ens_sc_pKa	ens_bb_pKa
4BYH.A	PRO	238	30	17.46	0.72	7.79				32.1	32.1	1
4BYH.A	SER	239	46.7	32.02	0.01			4.7	5.4	32.4	22.3
4BYH.A	VAL	240			-0.04			6.4		10.6	4.2
4BYH.A	PHE	241	111.2	42.43	0.04		63.3			80.5	17.2
4BYH.A	LEU	242	21.1	9.3	-0.01					26.6	26.6
4BYH.A	PHE	243	108.3	41.35	0.04		63			78.9	15.9
4BYH.A	PRO	244	57.6	33.54	-0.15					52.5	52.5
4BYH.A	PRO	245	2.5	1.43	-0.15					14.8	14.8
4BYH.A	LYS	246	136.2	57.84	1.04	10.36		48.9		100.4	51.5	1
4BYH.A	PRO	247	34	19.79	-0.15					37.1	37.1
4BYH.A	LYS	248	56.2	23.85	1.04	10.29	0.6	24.3		61.4	36.4	1
4BYH.A	ASP	249	17.6	9.97	-1.06	3.06			11.4	13.4	1.9	-1
4BYH.A	THR	250	4.6	2.63	0.01					6.2	6.2
4BYH.A	LEU	251	7.7	3.41	-0.01					11.1	11.1
4BYH.A	MET	252	69.7	28.48	0.01		14.2	1.5		44.6	28.9
4BYH.A	ILE	253	183.7	82.63	-0.03		61.1			112.8	51.7
4BYH.A	SER	254	101.9	69.87	0.01					58	58
4BYH.A	ARG	255	101.9	37.75	1.06	12.08		25.7		79	53.4	1
4BYH.A	THR	256	79.8	45.74	0.01				9.4	66	56.6
4BYH.A	PRO	257	2.8	1.65	-0.15					6.4	6.4
4BYH.A	GLU	258	63.8	30.74	-1.03	4.64			36.9	49.5	12.7	-1
4BYH.A	VAL	259			-0.04
4BYH.A	THR	260	33	18.93	0.01		4.1			30.3	26.2
4BYH.A	CYS	261			0.07
4BYH.A	VAL	262	12.3	6.3	-0.04		1.2	4.6		17.3	11.5
4BYH.A	VAL	263			-0.04
4BYH.A	VAL	264	44.4	22.74	-0.04		19.9		1.2	34.5	13.4
4BYH.A	ASP	265	67	37.91	-1.06	3.75			30.1	54	23.9	-1
4BYH.A	VAL	266			-0.04
4BYH.A	SER	267	28.8	19.75	0.01					27.4	27.4
4BYH.A	HIS	268	123.8	56.31	0.12	6.29				91.1	91.1
4BYH.A	GLU	269	166.9	80.44	-1.03	4.5			52	86	34	-1
4BYH.A	ASP	270	17.2	9.74	-1.06	4.57			17	25.6	8.6	-1
4BYH.A	PRO	271	49.9	29.03	-0.15					34.9	34.9
4BYH.A	GLU	272	140.4	67.68	-1.03	4.5			41.2	93.7	52.5	-1
4BYH.A	VAL	273	17.7	9.07	-0.04					22.1	22.1
4BYH.A	LYS	274	119	50.53	1.04	10.22		33.2		88.8	55.6	1
4BYH.A	PHE	275	26.2	9.99	0.04					31	31
4BYH.A	ASN	276	21.9	12.71	0.07			5.6	0.4	24.9	18.8
4BYH.A	TRP	277	1.2	0.39	0.03					10.1	10.1
4BYH.A	TYR	278	33.1	12.53	0.04	12.35		6.3		29.7	23.4
4BYH.A	VAL	279	16.8	8.58	-0.04					28.9	28.9
4BYH.A	ASP	280	75	42.43	-1.06	3.21			20.2	57.2	37	-1
4BYH.A	GLY	281	61	60.85	0.07			2		46.6	44.5
4BYH.A	VAL	282	116.7	59.72	-0.04					69.1	69.1
4BYH.A	GLU	283	61.4	29.59	-1.04	4.4			21.9	51.9	29.9	-1
4BYH.A	VAL	284	38.6	19.74	-0.04				1.6	36.8	35.2
4BYH.A	HIS	285	167.8	76.31	0.14	6.43			12.7	109.2	96.5
4BYH.A	ASN	286	94.4	54.66	0.07					69	69
4BYH.A	ALA	287	25.1	18.27	0.06					27.5	27.5
4BYH.A	LYS	288	164.6	69.92	1.04	10.5		48.5		111.4	62.9	1
4BYH.A	THR	289	77.7	44.52	0.01					60.5	60.5
4BYH.A	LYS	290	98.7	41.9	1.04	10.5		45.6		79	33.4	1
4BYH.A	PRO	291	130	75.73	-0.15				3.4	83.1	79.7
4BYH.A	ARG	292	96.3	35.65	1.06	11.94			11.3	89.6	78.4	1
4BYH.A	GLU	293	114.5	55.21	-1.03	4.64			44.5	85.4	40.8	-1
4BYH.A	GLU	294	71.5	34.48	-1.04	3.75			34	65.5	31.5	-1
4BYH.A	GLN	295	126.7	63.41	0.03		2.8		13.6	90.3	73.8
4BYH.A	TYR	296	218.1	82.54	0.03	9.44	52.2			126.8	74.7
4BYH.A	ASN	297	106.5	61.71	0.07					77	77
4BYH.A	SER	298	99.8	68.44	0.01					67.3	67.3
4BYH.A	THR	299	23.5	13.47	0.01					33.9	33.9
4BYH.A	TYR	300	11.3	4.27	0.04	10.63				23.5	23.5
4BYH.A	ARG	301	90.8	33.63	1.06	12.08		27.5		67.1	39.6	1
4BYH.A	VAL	302	1.8	0.91	-0.04					7.9	7.9
4BYH.A	VAL	303	9.4	4.83	-0.04		0.7	9.2		16.8	6.9
4BYH.A	SER	304			0.01
4BYH.A	VAL	305	18.3	9.34	-0.04			0.3	2.8	34.4	31.3
4BYH.A	LEU	306			-0.01					7.8	7.8
4BYH.A	THR	307	54.4	31.2	0.01				0.6	57.5	56.9
4BYH.A	VAL	308	1.6	0.84	-0.04					7	7
4BYH.A	LEU	309	115.1	50.72	-0.01					72.3	72.3
4BYH.A	HIS	310	29.2	13.27	0.95	8.03				44.4	44.4
4BYH.A	GLN	311	118.3	59.2	0.03					76.5	76.5
4BYH.A	ASP	312	13.1	7.43	-1.06	3.88				14.4	14.4	-1
4BYH.A	TRP	313	4.1	1.32	0.03					15.6	15.6
4BYH.A	LEU	314	36.3	16	-0.01					39.6	39.6
4BYH.A	ASN	315	124.1	71.85	0.07					77.9	77.9
4BYH.A	GLY	316	12.1	12.06	0.07				1.1	15.4	14.4
4BYH.A	LYS	317	68.1	28.91	1.04	10.29			3.4	55.4	52	1
4BYH.A	GLU	318	72.3	34.84	-1.03	4.57			35.7	48.3	12.6	-1
4BYH.A	TYR	319			0.04	11.64				3.2	3.2
4BYH.A	LYS	320	43.5	18.48	1.04	10.15		22.6		50.9	28.3	1
4BYH.A	CYS	321			0.07
4BYH.A	LYS	322	44.3	18.82	1.04	10.43		31.1		36.4	5.4	1
4BYH.A	VAL	323			-0.04
4BYH.A	SER	324	21.3	14.64	0.01					22.5	22.5
4BYH.A	ASN	325	13.2	7.63	0.07					20.9	20.9
4BYH.A	LYS	326	187.3	79.55	1.04	10.5		32	11.7	114.5	70.8	1
4BYH.A	ALA	327	55	40.04	0.06				5.4	43.9	38.5
4BYH.A	LEU	328	24	10.58	-0.01				9.7	32.3	22.7
4BYH.A	PRO	329	159.8	93.06	-0.15				9.7	87.1	77.5
4BYH.A	ALA	330	65.5	47.7	0.06					45.2	45.2
4BYH.A	PRO	331	65.9	38.36	-0.15			1.3		51.7	50.3
4BYH.A	ILE	332	51.6	23.23	-0.03			1		41	40
4BYH.A	GLU	333	82.3	39.69	-1.04	4.29				60.1	60.1	-1
4BYH.A	LYS	334	81.6	34.66	1.04	10.36		37.8		66.6	28.8	1
4BYH.A	THR	335	67.5	38.67	0.01				1.3	57.2	55.9
4BYH.A	ILE	336	32.3	14.51	-0.03					31.2	31.2
4BYH.A	SER	337	21.4	14.65	0.01					26.6	26.6
4BYH.A	LYS	338	12.3	5.21	1.05	12.41				26.5	26.5	1
4BYH.A	ALA	339	50.1	36.46	0.06		2.3			38.9	36.6
4BYH.A	LYS	340	137.7	58.47	1.04	10.43				103.1	103.1	1
4BYH.A	GLY	341	43.9	43.72	0.07					37.7	37.7
4BYH.A	GLN	342	154.5	77.29	0.03					88.2	88.2
4BYH.A	PRO	343	55.6	32.4	-0.15					45.5	45.5
4BYH.A	ARG	344	79.9	29.6	1.06	11.8				81.6	81.6	1
4BYH.A	GLU	345	81.6	39.35	-1.03	4.57			48.3	63.2	14.8	-1
4BYH.A	PRO	346	3.1	1.79	-0.15				3.4	4.7	1.3
4BYH.A	GLN	347	64.5	32.28	0.03			9.8	11.3	59.7	38.6
4BYH.A	VAL	348	5.3	2.72	-0.04					15.6	15.6
4BYH.A	TYR	349	5.2	1.97	0.04	11.5		5.8		20.9	15.2
4BYH.A	THR	350	12.7	7.31	0.01					21.1	21.1
4BYH.A	LEU	351			-0.01					4.8	4.8
4BYH.A	PRO	352	58.5	34.08	-0.15		16.6			48.5	31.9
4BYH.A	PRO	353	8.1	4.7	-0.15		1.8			20.3	18.5
4BYH.A	SER	354	14.1	9.69	0.01					16.5	16.5
4BYH.A	ARG	355	223.3	82.7	1.06	12.5		50.8		135.4	84.6	1
4BYH.A	GLU	356	101.5	48.94	-1.03	4.48			35.6	79.4	43.8	-1
4BYH.A	GLU	357			-1.04	3.15						-1
4BYH.A	MET	358	42.6	17.43	0.01		16			43.8	27.8
4BYH.A	THR	359	121	69.36	0.01					71.6	71.6
4BYH.A	LYS	360	87.8	37.29	1.04	10.43		38.7		64.1	25.3	1
4BYH.A	ASN	361	118.2	68.45	0.07			8.4	6.3	77.6	62.8
4BYH.A	GLN	362	73.7	36.86	0.03			1.1	0.6	67.2	65.5
4BYH.A	VAL	363			-0.04
4BYH.A	SER	364			0.01					5	5
4BYH.A	LEU	365			-0.01
4BYH.A	THR	366			0.01					0.2	0.2
4BYH.A	CYS	367			0.07
4BYH.A	LEU	368			-0.01
4BYH.A	VAL	369			-0.04
4BYH.A	LYS	370	28.5	12.09	1.05	11.15		31.5		42	10.5	1
4BYH.A	GLY	371	16.4	16.37	0.07				2.2	23.6	21.4
4BYH.A	PHE	372			0.04
4BYH.A	TYR	373	36.6	13.84	0.04	10.07	15.8			30.4	14.6
4BYH.A	PRO	374			-0.15		0.2			2.1	1.9
4BYH.A	SER	375	32.6	22.36	0.01					34.6	34.6
4BYH.A	ASP	376	34.3	19.39	-1.06	4.64				40.3	40.3	-1
4BYH.A	ILE	377	17.6	7.94	-0.03					22.5	22.5
4BYH.A	ALA	378	25.2	18.33	0.06					23.1	23.1
4BYH.A	VAL	379	7.5	3.86	-0.04					19.2	19.2
4BYH.A	GLU	380	36.7	17.68	-1.04	3.77			28.5	46.6	18.1	-1
4BYH.A	TRP	381			0.03				1.8	2.5	0.6
4BYH.A	GLU	382	29.2	14.06	-1.04	3.92			9	36.7	27.7	-1
4BYH.A	SER	383	3.6	2.5	0.01					15.3	15.3
4BYH.A	ASN	384	130.9	75.82	0.07					89.7	89.7
4BYH.A	GLY	385	86.8	86.55	0.07					52.3	52.3
4BYH.A	GLN	386	122.4	61.22	0.03					74.5	74.5
4BYH.A	PRO	387	88.7	51.67	-0.15				1.2	64.6	63.4
4BYH.A	GLU	388	20	9.66	-1.04	3.83			1.2	21.5	20.3	-1
4BYH.A	ASN	389	113.8	65.89	0.07					76.5	76.5
4BYH.A	ASN	390	59.1	34.2	0.07					62.2	62.2
4BYH.A	TYR	391	50.6	19.15	0.04	11.41				54.7	54.7
4BYH.A	LYS	392	68.7	29.16	1.04	10.43				53.7	53.7	1
4BYH.A	THR	393	43	24.63	0.01					40.7	40.7
4BYH.A	THR	394	1	0.58	0.01					2.8	2.8
4BYH.A	PRO	395	68.7	39.98	-0.15					54.3	54.3
4BYH.A	PRO	396	50.2	29.23	-0.15		0.5			41.3	40.8
4BYH.A	VAL	397	20.8	10.62	-0.04					28	28
4BYH.A	LEU	398	107.7	47.46	-0.01		48.5			80.1	31.6
4BYH.A	ASP	399	12.8	7.24	-1.06					22.7	22.7	-1
4BYH.A	SER	400	111.8	76.66	0.01			2.8		70.8	67.9
4BYH.A	ASP	401	119.5	67.64	-1.06	1.83				67	67	-1
4BYH.A	GLY	402	26.9	26.79	0.07		0.1			28.7	28.6
4BYH.A	SER	403	0.8	0.56	0.01					7.2	7.2
4BYH.A	PHE	404	37.2	14.19	0.04		24			31.1	7.1
4BYH.A	PHE	405			0.04
4BYH.A	LEU	406	1.3	0.56	-0.01					7	7
4BYH.A	TYR	407			0.04	12.35
4BYH.A	SER	408			0.01
4BYH.A	LYS	409	1.8	0.78	1.01	8.86		2.6		3.8	1.1	1
4BYH.A	LEU	410			-0.01
4BYH.A	THR	411	15.9	9.1	0.01			3.4		24.1	20.7
4BYH.A	VAL	412	3.3	1.7	-0.04					12.2	12.2
4BYH.A	ASP	413	65.9	37.33	-1.06	3.29			32.9	49.9	17	-1
4BYH.A	LYS	414	51.9	22.05	1.04	10.15		31.3		48.2	16.9	1
4BYH.A	SER	415	78.2	53.63	0.01					57.1	57.1
4BYH.A	ARG	416	84	31.09	1.06	12.01				73.3	73.3	1
4BYH.A	TRP	417	5.8	1.86	0.03		14.9			21.8	6.9
4BYH.A	GLN	418	75.5	37.77	0.03		3.3	10.7		56.7	42.6
4BYH.A	GLN	419	141.8	70.94	0.03					92.2	92.2
4BYH.A	GLY	420	35.9	35.78	0.07					28.1	28.1
4BYH.A	ASN	421	40.4	23.4	0.07					33.6	33.6
4BYH.A	VAL	422	84.5	43.24	-0.04					63.9	63.9
4BYH.A	PHE	423			0.04
4BYH.A	SER	424	7.9	5.4	0.01					11.6	11.6
4BYH.A	CYS	425			0.07
4BYH.A	SER	426	1.1	0.72	0.01				3	4.3	1.3
4BYH.A	VAL	427			-0.04
4BYH.A	MET	428	14.4	5.9	0.01		15.8			27.4	11.6
4BYH.A	HIS	429			0.05	3.56
4BYH.A	GLU	430	16.2	7.8	-1.04	1.52				21.9	21.9	-1
4BYH.A	ALA	431	30.8	22.42	0.06				8.7	29.7	20.9
4BYH.A	LEU	432	13.4	5.92	-0.01				0.4	19	18.6
4BYH.A	HIS	433	165.2	75.11	0.13	6.36			1.6	103.7	102.1
4BYH.A	ASN	434	121.2	70.18	0.07					86.9	86.9
4BYH.A	HIS	435	45.4	20.65	0.28	6.88				48.6	48.6
4BYH.A	TYR	436	101.5	38.4	0.04	11.58	39.5		0.5	82.6	42.6
4BYH.A	THR	437	28.2	16.19	0.01					30.9	30.9
4BYH.A	GLN	438	71.4	35.72	0.03					56.5	56.5
4BYH.A	LYS	439	69.4	29.49	1.04	10.43				69.2	69.2	1
4BYH.A	SER	440	64.5	44.25	0.01					47	47
4BYH.A	LEU	441	14.5	6.37	-0.01		4.2			19	14.8
4BYH.A	SER	442	34.1	23.42	0.01					38.3	38.3
4BYH.A	LEU	443	79	34.83	-0.01		27.2			57.6	30.4
4BYH.A	SER	444	169.3	116.09	0.01					88.8	88.8
4BYH.B	GLY	236	152.2	151.68	1.09	7.86		43.4		68.1	24.7	1
4BYH.B	GLY	237	28.5	28.38	0.07			3.6	4.1	39.6	31.8
4BYH.B	PRO	238	6.6	3.85	-0.15					11	11
4BYH.B	SER	239	39.4	26.99	0.01			4.9	7.2	32	20
4BYH.B	VAL	240	2.1	1.07	-0.04			4.9		9.8	4.9
4BYH.B	PHE	241	116.5	44.47	0.04		62.9			79	16.1
4BYH.B	LEU	242	19	8.39	-0.01					25.1	25.1
4BYH.B	PHE	243	108.9	41.55	0.04		61.1			77.2	16.1
4BYH.B	PRO	244	55.2	32.15	-0.15					52.5	52.5
4BYH.B	PRO	245	3.5	2.02	-0.15					9.5	9.5
4BYH.B	LYS	246	135.7	57.61	1.04	10.36		45.2		97.6	52.4	1
4BYH.B	PRO	247	50.2	29.26	-0.15					46.1	46.1
4BYH.B	LYS	248	80.6	34.25	1.04	10.5		37.2		73.7	36.5	1
4BYH.B	ASP	249	28.9	16.38	-1.06	3.83			21.6	23.6	2	-1
4BYH.B	THR	250	2	1.16	0.01					5.8	5.8
4BYH.B	LEU	251	14.9	6.57	-0.01					30.3	30.3
4BYH.B	MET	252	41.1	16.8	0.01		4.4	1.4		43.4	37.6
4BYH.B	ILE	253	183.5	82.55	-0.03		56.5			108.5	52
4BYH.B	SER	254	96.9	66.46	0.01					59.3	59.3
4BYH.B	ARG	255	120.8	44.74	1.06	12.36		42.8		86.4	43.6	1
4BYH.B	THR	256	76.3	43.74	0.01				10	65.5	55.5
4BYH.B	PRO	257	3.8	2.23	-0.15					6.9	6.9
4BYH.B	GLU	258	60.6	29.22	-1.03	4.71			39.2	48.2	9	-1
4BYH.B	VAL	259			-0.04
4BYH.B	THR	260	33.9	19.46	0.01		1.1		4.3	34.8	29.4
4BYH.B	CYS	261			0.07
4BYH.B	VAL	262	9.6	4.92	-0.04		7.1	2.2		14.1	4.9
4BYH.B	VAL	263			-0.04
4BYH.B	VAL	264	37.8	19.35	-0.04		23.1		1.1	35.4	11.2
4BYH.B	ASP	265	66.9	37.85	-1.06	4.01			33.6	54.6	21	-1
4BYH.B	VAL	266			-0.04
4BYH.B	SER	267	22.5	15.4	0.01				2.3	26.8	24.5
4BYH.B	HIS	268	99	45.02	0.47	7.27			15.4	82.6	67.2
4BYH.B	GLU	269	149	71.82	-1.04	3.72			51.4	81.8	30.3	-1
4BYH.B	ASP	270	24.4	13.83	-1.06	4.23			22.6	27.3	4.7	-1
4BYH.B	PRO	271	34.9	20.33	-0.15			1.1		40.5	39.5
4BYH.B	GLU	272	129	62.18	-1.03	4.5			39.6	92.8	53.2	-1
4BYH.B	VAL	273	17.1	8.76	-0.04					22.6	22.6
4BYH.B	LYS	274	140.5	59.65	1.04	10.5		44.2		92.9	48.6	1
4BYH.B	PHE	275	21.2	8.1	0.04					29.2	29.2
4BYH.B	ASN	276	22.5	13	0.07			3	1.5	28.4	23.8
4BYH.B	TRP	277	2.2	0.72	0.03					12.3	12.3
4BYH.B	TYR	278	34.1	12.9	0.04	12.25		7.8		33.8	26
4BYH.B	VAL	279	20.5	10.51	-0.04					28.4	28.4
4BYH.B	ASP	280	71.7	40.58	-1.06	3.15			17.5	53.5	35.9	-1
4BYH.B	GLY	281	64	63.79	0.07			0.2		45.7	45.6
4BYH.B	VAL	282	123.6	63.23	-0.04					65.9	65.9
4BYH.B	GLU	283	67.6	32.6	-1.04	4.14			19.5	47.8	28.3	-1
4BYH.B	VAL	284	36.1	18.5	-0.04				1.9	37.8	35.9
4BYH.B	HIS	285	162	73.66	0.14	6.43			11.9	113.7	101.8
4BYH.B	ASN	286	105.5	61.13	0.07					72.2	72.2
4BYH.B	ALA	287	22.2	16.16	0.06					24.3	24.3
4BYH.B	LYS	288	164.7	69.95	1.04	10.5		51.2		117	65.8	1
4BYH.B	THR	289	72.2	41.41	0.01					55.3	55.3
4BYH.B	LYS	290	102.9	43.7	1.04	10.36		39.6		79.4	39.8	1
4BYH.B	PRO	291	117.4	68.4	-0.15				2.8	74.1	71.3
4BYH.B	ARG	292	114.6	42.42	1.06	12.01		37.7	4.9	89.7	47.2	1
4BYH.B	GLU	293	107.2	51.7	-1.03	4.71			40.3	74.3	33.9	-1
4BYH.B	GLU	294	90.4	43.58	-1.04	4.47				67.6	67.6	-1
4BYH.B	GLN	295	53.4	26.7	0.03					50.9	50.9
4BYH.B	TYR	296	271.8	102.83	0.04	10	78.7			162	83.3
4BYH.B	ASN	297	115.3	66.79	0.07				0.1	79.2	79.2
4BYH.B	SER	298	77.5	53.16	0.01				4.8	52.9	48.1
4BYH.B	THR	299	27	15.48	0.01				1.7	30.1	28.4
4BYH.B	TYR	300	24.7	9.33	0.04	11.71		5.1		23.5	18.5
4BYH.B	ARG	301	87.3	32.33	1.06	12.29	0.1	43.5		73	29.4	1
4BYH.B	VAL	302	4.5	2.31	-0.04					17.1	17.1
4BYH.B	VAL	303	9.3	4.78	-0.04			10.7		24.2	13.4
4BYH.B	SER	304			0.01
4BYH.B	VAL	305	16.3	8.33	-0.04			2.3	2.1	33.9	29.5
4BYH.B	LEU	306	2.3	1.03	-0.01					8	8
4BYH.B	THR	307	51.1	29.31	0.01				0.7	58.2	57.5
4BYH.B	VAL	308	0.8	0.43	-0.04					6	6
4BYH.B	LEU	309	114.9	50.65	-0.01					75.4	75.4
4BYH.B	HIS	310	36.2	16.47	0.94	8				48.3	48.3
4BYH.B	GLN	311	109.7	54.88	0.03					78.6	78.6
4BYH.B	ASP	312	13.9	7.86	-1.06	3.88				15	15	-1
4BYH.B	TRP	313	6.5	2.1	0.03					20.7	20.7
4BYH.B	LEU	314	31.8	13.99	-0.01					50.1	50.1
4BYH.B	ASN	315	123.7	71.65	0.07					80	80
4BYH.B	GLY	316	22.8	22.69	0.07				8.2	22.4	14.2
4BYH.B	LYS	317	71.2	30.24	1.04	10.29			5.3	59.3	54	1
4BYH.B	GLU	318	70.3	33.87	-1.03	4.5			37.6	52.2	14.6	-1
4BYH.B	TYR	319	0.9	0.32	0.04	11.59				5.9	5.9
4BYH.B	LYS	320	49	20.81	1.04	10.15		23.5		50.8	27.3	1
4BYH.B	CYS	321			0.07
4BYH.B	LYS	322	53	22.51	1.04	10.43		30.9		42	11.1	1
4BYH.B	VAL	323			-0.04
4BYH.B	SER	324	26.7	18.31	0.01					26	26
4BYH.B	ASN	325	14	8.1	0.07					19.6	19.6
4BYH.B	LYS	326	181.9	77.24	1.04	10.5		43.5	0.9	115.5	71.1	1
4BYH.B	ALA	327	44.4	32.32	0.06				2.1	40.5	38.4
4BYH.B	LEU	328	19.4	8.56	-0.01					31.8	31.8
4BYH.B	PRO	329	160.1	93.22	-0.15					87.4	87.4
4BYH.B	ALA	330	62.8	45.72	0.06					47.7	47.7
4BYH.B	PRO	331	71.5	41.66	-0.15			0.5		54.8	54.3
4BYH.B	ILE	332	49.1	22.07	-0.03			1.3		43.1	41.8
4BYH.B	GLU	333	89.9	43.35	-1.04	4.31				58.5	58.5	-1
4BYH.B	LYS	334	89.2	37.86	1.04	10.36		34.3		64.6	30.3	1
4BYH.B	THR	335	69.1	39.61	0.01				0.6	56.7	56.1
4BYH.B	ILE	336	34.5	15.53	-0.03			0.7		35.1	34.3
4BYH.B	SER	337	14.9	10.25	0.01			8.7		22	13.3
4BYH.B	LYS	338	25.1	10.68	1.04	10.08				43.9	43.9	1
4BYH.B	ALA	339	53.5	39	0.06		2	1.9		43.1	39.1
4BYH.B	LYS	340	159.2	67.62	1.04	10.36		34.9		114.8	79.9	1
4BYH.B	GLY	341	31.7	31.55	0.07		0.5			33	32.6
4BYH.B	GLN	342	165.2	82.69	0.03					95.2	95.2
4BYH.B	PRO	343	58.7	34.18	-0.15					53.7	53.7
4BYH.B	ARG	344	89	32.95	1.06	12.01		3.3		82.8	79.5	1
4BYH.B	GLU	345	100.5	48.46	-1.03	4.57			47.7	71.5	23.8	-1
4BYH.B	PRO	346	4.1	2.36	-0.15				3.7	6.9	3.2
4BYH.B	GLN	347	58.8	29.42	0.03			7.4		49.9	42.5
4BYH.B	VAL	348	5.3	2.7	-0.04					16.2	16.2
4BYH.B	TYR	349	11.1	4.21	0.04	12				11.3	11.3
4BYH.B	THR	350	12.3	7.05	0.01					20.4	20.4
4BYH.B	LEU	351			-0.01					8.9	8.9
4BYH.B	PRO	352	55.9	32.55	-0.15		19.3			49.9	30.6
4BYH.B	PRO	353	9	5.25	-0.15		2			15.3	13.2
4BYH.B	SER	354	12.3	8.46	0.01					18.7	18.7
4BYH.B	ARG	355	212.8	78.8	1.06	12.5		49.6		131.2	81.6	1
4BYH.B	GLU	356	98.8	47.65	-1.04	3.59				73.5	73.5	-1
4BYH.B	GLU	357			-1.04	3.32				4.5	4.5	-1
4BYH.B	MET	358	36.8	15.04	0.01		14.5			41	26.5
4BYH.B	THR	359	120.1	68.86	0.01					69.5	69.5
4BYH.B	LYS	360	77.8	33.03	1.04	10.36		47.9		69.6	21.8	1
4BYH.B	ASN	361	119	68.9	0.07			11.2	7.1	76.3	58
4BYH.B	GLN	362	66.7	33.39	0.03			3.5	8.6	64.8	52.6
4BYH.B	VAL	363			-0.04
4BYH.B	SER	364			0.01
4BYH.B	LEU	365			-0.01
4BYH.B	THR	366			0.01
4BYH.B	CYS	367			0.07
4BYH.B	LEU	368			-0.01					4.4	4.4
4BYH.B	VAL	369			-0.04
4BYH.B	LYS	370	18.3	7.78	1.05	11.22		21.8		27.8	6	1
4BYH.B	GLY	371	0.8	0.81	0.07			0.1		7.8	7.7
4BYH.B	PHE	372			0.04
4BYH.B	TYR	373	40.6	15.36	0.02	9.11	17.6			37.3	19.8
4BYH.B	PRO	374	1.8	1.03	-0.15		1			16.5	15.6
4BYH.B	SER	375	27.2	18.65	0.01					34.2	34.2
4BYH.B	ASP	376	25.1	14.22	-1.06	5.07				37.4	37.4	-1
4BYH.B	ILE	377	12	5.4	-0.03					18.8	18.8
4BYH.B	ALA	378	6.1	4.44	0.06					10.3	10.3
4BYH.B	VAL	379	6.6	3.4	-0.04					19	19
4BYH.B	GLU	380	43.6	21.01	-1.03	4.5			37	55.9	18.9	-1
4BYH.B	TRP	381			0.03
4BYH.B	GLU	382	24.2	11.66	-1.04	3.92			10.4	30.6	20.2	-1
4BYH.B	SER	383	4.4	3.02	0.01					25.2	25.2
4BYH.B	ASN	384	145.8	84.45	0.07					90.6	90.6
4BYH.B	GLY	385	73.1	72.84	0.07					46.3	46.3
4BYH.B	GLN	386	132.9	66.51	0.03					77.4	77.4
4BYH.B	PRO	387	81.1	47.21	-0.15				2.5	64.1	61.6
4BYH.B	GLU	388	12.3	5.92	-1.04	3.24				13.5	13.5	-1
4BYH.B	ASN	389	118.1	68.4	0.07					74.6	74.6
4BYH.B	ASN	390	88.7	51.35	0.07					59.9	59.9
4BYH.B	TYR	391	46.5	17.6	0.04	11.6				53.1	53.1
4BYH.B	LYS	392	75.1	31.88	1.04	10.43		32.8		64.3	31.6	1
4BYH.B	THR	393	40	22.96	0.01					39.2	39.2
4BYH.B	THR	394	0.4	0.26	0.01					3.8	3.8
4BYH.B	PRO	395	70.4	41	-0.15					52.1	52.1
4BYH.B	PRO	396	45	26.2	-0.15					40.5	40.5
4BYH.B	VAL	397	21.2	10.83	-0.04					25.7	25.7
4BYH.B	LEU	398	114.8	50.61	-0.01		49.5			80.4	30.9
4BYH.B	ASP	399	5.7	3.22	-1.06					19.5	19.5	-1
4BYH.B	SER	400	84.4	57.87	0.01					58.7	58.7
4BYH.B	ASP	401	103.7	58.69	-1.06	1.4				58.6	58.6	-1
4BYH.B	GLY	402	36.4	36.3	0.07					32.7	32.7
4BYH.B	SER	403			0.01					6.5	6.5
4BYH.B	PHE	404	38.8	14.81	0.04		24.1			31.3	7.2
4BYH.B	PHE	405			0.04
4BYH.B	LEU	406	1.5	0.65	-0.01					6	6
4BYH.B	TYR	407			0.04	12.33
4BYH.B	SER	408			0.01
4BYH.B	LYS	409			1.02	8.91		2.9		5.4	2.5	1
4BYH.B	LEU	410			-0.01
4BYH.B	THR	411	26.8	15.35	0.01			2.8		39.5	36.7
4BYH.B	VAL	412	1.7	0.86	-0.04					5.7	5.7
4BYH.B	ASP	413	65.8	37.23	-1.06	3.42			31	45.9	14.9	-1
4BYH.B	LYS	414	61.9	26.29	1.04	10.15		37.3		52.1	14.8	1
4BYH.B	SER	415	84.1	57.64	0.01			4.3		61.5	57.1
4BYH.B	ARG	416	83.3	30.85	1.06	12.01				77.2	77.2	1
4BYH.B	TRP	417	5.7	1.83	0.03		15.2			21.5	6.3
4BYH.B	GLN	418	80	40.01	0.03			6.2		58	51.9
4BYH.B	GLN	419	143.6	71.84	0.03					92.7	92.7
4BYH.B	GLY	420	36.7	36.58	0.07					26.1	26.1
4BYH.B	ASN	421	38.3	22.16	0.07					36.6	36.6
4BYH.B	VAL	422	86.8	44.43	-0.04					62.7	62.7
4BYH.B	PHE	423			0.04
4BYH.B	SER	424	7.3	5.03	0.01					11.7	11.7
4BYH.B	CYS	425			0.07
4BYH.B	SER	426			0.01				4.5	7.2	2.6
4BYH.B	VAL	427			-0.04
4BYH.B	MET	428	20	8.17	0.01		17.8		1.2	32.7	13.7
4BYH.B	HIS	429			0.05	2.89
4BYH.B	GLU	430	16.4	7.88	-1.03	5.14			7.8	35.4	27.6	-1
4BYH.B	ALA	431	34.7	25.26	0.06				10	33.7	23.7
4BYH.B	LEU	432	8.9	3.94	-0.01				5.7	21.3	15.6
4BYH.B	HIS	433	168.1	76.43	0.13	6.36			0.8	104	103.2
4BYH.B	ASN	434	112.9	65.37	0.07					81.2	81.2
4BYH.B	HIS	435	87.9	39.98	0.18	6.61			0.3	71.7	71.5
4BYH.B	TYR	436	103.1	39.01	0.04	11.5	41		1	92	50
4BYH.B	THR	437	32.6	18.67	0.01					30.8	30.8
4BYH.B	GLN	438	75	37.51	0.03					57.1	57.1
4BYH.B	LYS	439	77.3	32.83	1.04	10.43		34.8		66.7	31.9	1
4BYH.B	SER	440	59.2	40.6	0.01					48.9	48.9
4BYH.B	LEU	441	16.1	7.1	-0.01		3.7			19.8	16
4BYH.B	SER	442	40	27.45	0.01					42	42
4BYH.B	LEU	443	59.8	26.38	-0.01		21.4			56.8	35.3
4BYH.B	SER	444	173.5	119.01	0.01					91.9	91.9
