# Supplementary material for: Methacrylate Coatings for Titanium Surfaces to Optimize Biocompatibility
Source: Micromachines (Basel). 2020 Jan 13;11(1):87. doi: 10.3390/mi11010087 (PMC7019220; doi:10.3390/mi11010087)
Supplement: Supplementary file 1 [file micromachines-11-00087-s001.zip › S6.csv]

Chain	Res	UID	res_ASA	res_exp	res_charge	propKa	res_hyd	res_pos	res_neg	res_tot	res_oth	ens_res_charge	ens_sc_pKa	ens_bb_pKa
4Y99.C	THR	31	204.7	117.35	0.75	7.93		45.6		113.7	68	1
4Y99.C	GLU	32	153.9	74.2	-1.06	4.55		3.4	36.7	91.1	51	-1
4Y99.C	PRO	33	90.2	52.53	-0.17				2.1	68.8	66.7
4Y99.C	HIS	34	116.3	52.9	0.32	7.03				87.8	87.8
4Y99.C	ALA	35	101.9	74.23	0.04					60.4	60.4
4Y99.C	LYS	36	57.6	24.47	1.02	9.94				73.3	73.3	1
4Y99.C	LYS	37	149.7	63.57	1.02	10.43		47.2		139.7	92.5	1
4Y99.C	LYS	38	100.8	42.79	0.04					65.4	65.4
4Y99.C	SER	39	48.1	32.96	-0.01					45.5	45.5
4Y99.C	LYS	40	151.3	64.26	1.02	10.43				95.8	95.8	1
4Y99.C	ILE	41	15.4	6.92	-0.04					25.2	25.2
4Y99.C	SER	42	59.4	40.76	-0.01					42.2	42.2
4Y99.C	ALA	43	8.2	6	0.04				0.2	14.4	14.2
4Y99.C	SER	44	32.3	22.17	-0.01					30	30
4Y99.C	ARG	45	57.7	21.35	1.03	11.8				60.4	60.4	1
4Y99.C	LYS	46	14.9	6.31	1.02	12.84			0.1	24	23.9	1
4Y99.C	LEU	47	39.6	17.46	-0.03		22.4			37.5	15
4Y99.C	GLN	48	88.6	44.35	0.01				3.8	61.2	57.4
4Y99.C	LEU	49			-0.03
4Y99.C	LYS	50			1.02	12.75				7.2	7.2	1
4Y99.C	THR	51	31.4	18.02	-0.01				2.8	35.2	32.4
4Y99.C	LEU	52	43.1	18.99	-0.03					41.2	41.2
4Y99.C	LEU	53			-0.03
4Y99.C	LEU	54	0.4	0.17	-0.03					3.4	3.4
4Y99.C	GLN	55	89.3	44.68	0.01				8.4	72.3	63.8
4Y99.C	ILE	56	8.7	3.93	-0.04					24.6	24.6
4Y99.C	ALA	57			0.04
4Y99.C	LYS	58	80.6	34.23	1.02	10.29		28.9	0.2	69.5	40.5	1
4Y99.C	GLN	59	103.7	51.9	0.01					81.2	81.2
4Y99.C	GLU	60	32.7	15.76	-1.06	1.76				48.4	48.4	-1
4Y99.C	LEU	61	39.1	17.25	-0.03					45.1	45.1
4Y99.C	GLU	62	107.1	51.64	-1.06	4.57			36.5	78.1	41.7	-1
4Y99.C	ARG	63	169.9	62.91	1.03	12.43				118.5	118.5	1
4Y99.C	GLU	64	50.6	24.37	-1.06	2.8			0.8	49.7	48.9	-1
4Y99.C	ALA	65	34.6	25.2	0.04					27.3	27.3
4Y99.C	GLU	66	107.1	51.63	-1.06	4.03				68.6	68.6	-1
4Y99.C	GLU	67	102.9	49.61	-1.06	4.5			39.1	79.3	40.2	-1
4Y99.C	ARG	68	52.4	19.41	1.03	11.94			4.1	87.3	83.2	1
4Y99.C	ARG	69	135.5	50.18	1.03	11.66				102.9	102.9	1
4Y99.C	GLY	70	29.1	28.98	0.05			0.7		25.2	24.5
4Y99.C	GLU	71	73.3	35.33	-1.06	4.64			35.5	57	21.5	-1
4Y99.C	LYS	72	43.9	18.64	1.02	10.08				47	47	1
4Y99.C	GLY	73	39.2	39.1	0.05					33.9	33.9
4Y99.C	ARG	74	164.8	61.02	1.03	12.08		38.5		113.2	74.7	1
4Y99.C	ALA	75	14	10.22	0.04					19	19
4Y99.C	LEU	76	6.4	2.82	-0.03		5.1			13.2	8.1
4Y99.C	SER	77	72.2	49.5	-0.01					53.2	53.2
4Y99.C	THR	78	125.4	71.91	-0.01					74.1	74.1
4Y99.C	ARG	79	85.1	31.52	1.03	11.94		27.9		81	53	1
4Y99.C	ALA	80	0.4	0.27	0.04					10.9	10.9
4Y99.C	GLN	81	111.5	55.81	0.01					73	73
4Y99.C	PRO	82	110.9	64.57	-0.17		1.6			81.2	79.7
4Y99.C	LEU	83	35.7	15.72	-0.03		16.1			49	32.9
4Y99.C	GLU	84	154.8	74.62	-1.06	4.5			51.6	103.7	52.2	-1
4Y99.C	LEU	85	22.4	9.87	-0.03		5.9			29	23.1
4Y99.C	ALA	86	104.4	76.03	0.04				7.1	60.5	53.4
4Y99.C	GLY	87	85.4	85.11	0.05				12.8	54	41.2
4Y99.C	LEU	88	44.5	19.6	-0.03		19.3		2.8	48.5	26.5
4Y99.C	GLY	89	30.9	30.82	0.05				1.6	25.4	23.9
4Y99.C	PHE	90	87.4	33.34	0.02					71	71
4Y99.C	ALA	91	64.8	47.22	0.04					43.5	43.5
4Y99.C	GLU	92	93.4	45.04	-1.06	3.66			27.7	64.8	37.1	-1
4Y99.C	LEU	93			-0.03
4Y99.C	GLN	94	22.2	11.13	0.01					24.6	24.6
4Y99.C	ASP	95	85.7	48.54	-1.09	3.5				56.9	56.9	-1
4Y99.C	LEU	96	24.9	10.97	-0.03		19.9			35	15.2
4Y99.C	ALA	97			0.04
4Y99.C	ARG	98	118	43.69	1.03	12.01				94.6	94.6	1
4Y99.C	GLN	99	119.6	59.85	0.01					81	81
4Y99.C	LEU	100	12.9	5.68	-0.03		14.3			17	2.7
4Y99.C	HIS	101	24.5	11.13	0.65	7.46	6.8			39	32.2
4Y99.C	ALA	102	59.5	43.31	0.04					46.6	46.6
4Y99.C	ARG	103	83.7	31	1.03	12.01	3.8	21.2		78.2	53.1	1
4Y99.C	VAL	104	6.4	3.29	-0.06		15.7			26.5	10.8
4Y99.C	ASP	105	41.8	23.68	-1.09	3.75			0.3	47.9	47.6	-1
4Y99.C	LYS	106	128.9	54.75	1.02	10.5		41	1.2	80	37.9	1
4Y99.C	VAL	107			-0.06
4Y99.C	ASP	108	2.4	1.38	-1.09					17.3	17.3	-1
4Y99.C	GLU	109	67.3	32.46	-1.06	4.09			34.8	46.3	11.6	-1
4Y99.C	GLU	110	56.1	27.03	-1.06	4.02				47.7	47.7	-1
4Y99.C	ARG	111	4.4	1.62	1.03	13.7				22.3	22.3	1
4Y99.C	TYR	112	19.2	7.27	0.02	10.07	8.5			31.1	22.6
4Y99.C	ASP	113	54.7	30.95	-1.09	3.35				46	46	-1
4Y99.C	ILE	114	18	8.12	-0.04		13.1			27.1	14
4Y99.C	GLU	115	62.6	30.16	-1.06	3.89	0.1			48.7	48.7	-1
4Y99.C	ALA	116	32	23.3	0.04		1.3			38.7	37.4
4Y99.C	LYS	117	115	48.86	1.02	10.5	1.1	48.5		82.8	33.2	1
4Y99.C	VAL	118	3.6	1.86	-0.06		5.4			10.3	4.9
4Y99.C	THR	119	72.9	41.8	-0.01					53.9	53.9
4Y99.C	LYS	120	124.2	52.74	1.02	10.29				109.8	109.8	1
4Y99.C	ASN	121	3.4	1.98	0.05					9.4	9.4
4Y99.C	ILE	122	96.3	43.33	-0.04		41.5	1		68.1	25.6
4Y99.C	THR	123	98	56.21	-0.01					63.9	63.9
4Y99.C	GLU	124	52.6	25.37	-1.06	4.08				45.3	45.3	-1
4Y99.C	ILE	125	32.9	14.79	-0.04				0.3	33.7	33.4
4Y99.C	ALA	126	67	48.84	0.04					44.8	44.8
4Y99.C	ASP	127	67.4	38.15	-1.09	3.62				51.5	51.5	-1
4Y99.C	LEU	128	13.2	5.81	-0.03					18.6	18.6
4Y99.C	THR	129	64.2	36.79	-0.01					49.5	49.5
4Y99.C	GLN	130	102.2	51.13	0.01					79.6	79.6
4Y99.C	LYS	131	95	40.36	1.02	10.29				75.8	75.8	1
4Y99.C	ILE	132	2.3	1.05	-0.04					7.6	7.6
4Y99.C	PHE	133	161.8	61.75	0.02		76.9			110.4	33.5
4Y99.C	ASP	134	93.9	53.17	-1.09	3.36				57.8	57.8	-1
4Y99.C	LEU	135	73	32.19	-0.03					59.2	59.2
4Y99.C	ARG	136	135.9	50.32	1.03	12.01				100.3	100.3	1
4Y99.C	GLY	137	116.3	115.99	0					58.8	58.8
4Y99.C	ARG	148	169	62.59	2.06	9.94	0.3	81.3	1.3	151.8	69	2
4Y99.C	ILE	149	41.8	18.81	-0.04		17.4	4.7		55.3	33.1
4Y99.C	SER	150	40.8	27.98	-0.01			9		38.7	29.7
4Y99.C	ALA	151			0.05		2.7		0.7	12.4	8.9
4Y99.C	ASP	152	68.3	38.64	-1.08	4.01			33	53.2	20.3	-1
4Y99.C	ALA	153	50.3	36.67	0.05		3.4			42.5	39.1
4Y99.C	MET	154	1.8	0.72	-0.01		4.2			9.2	4.9
4Y99.C	MET	155	0.4	0.16	-0.01					3.5	3.5
4Y99.C	GLN	156	111.1	55.6	0.01					80.6	80.6
4Y99.C	ALA	157	73.1	53.28	0.05		5.7			48.6	42.9
4Y99.C	LEU	158	25.8	11.37	-0.03		9.3			32	22.7
4Y99.C	LEU	159	8.2	3.63	-0.03					13.3	13.3
4Y99.C	GLY	160	29.4	29.3	0.05					20.9	20.9
4Y99.C	ALA	161	97.7	71.19	0.05					61.9	61.9
4Y99.C	ARG	162	160.2	59.32	1.03	12.36		41.1	3.1	114.9	70.7	1
4Y99.C	ALA	163	14.1	10.25	0.05					17.4	17.4
4Y99.C	LYS	164	184.2	78.21	1.02	10.5		42	12.3	115.5	61.1	1
4Y99.C	GLU	165	89.3	43.06	-1.06	4.5			49.2	63.8	14.6	-1
4Y99.C	SER	166	29.4	20.16	-0.01				15.1	41.7	26.5
4Y99.B	GLY	199	90.8	90.48	1.06	7.86		48.7		60.7	12	1
4Y99.B	LYS	200	188.4	80	1.02	10.5		65		117	52.1	1
4Y99.B	ARG	201	210.8	78.06	1.03	12.5		77.2		128.5	51.3	1
4Y99.B	GLN	202	125.7	62.91	0.01			12.6	0.7	86.2	72.9
4Y99.B	THR	203	95.8	54.94	-0.01		0.1			60.2	60.1
4Y99.B	GLU	204	74.4	35.86	-1.06	4.03				76.5	76.5	-1
4Y99.B	ARG	205	179.1	66.32	1.03	12.5		57.9		124.7	66.8	1
4Y99.B	GLU	206	120.4	58.06	-1.06	4.5			44.5	84.9	40.4	-1
4Y99.B	LYS	207	115.1	48.89	1.02	10.5	10.1	46.8		82	25	1
4Y99.B	LYS	208	38.1	16.19	1.02	10.08				51.9	51.9	1
4Y99.B	LYS	209	154.4	65.56	1.02	10.5		60.3		104.3	44	1
4Y99.B	LYS	210	136.5	57.95	1.02	10.5	0.9	37		89.3	51.5	1
4Y99.B	ILE	211	51.5	23.17	-0.04		34	0.3		51.4	17.2
4Y99.B	LEU	212	14.5	6.39	-0.03					27.9	27.9
4Y99.B	ALA	213	46	33.53	0.04					39.4	39.4
4Y99.B	GLU	214	133.6	64.4	-1.06	4.71				84.4	84.4	-1
4Y99.B	ARG	215	102.5	37.94	1.03	12.01				91.9	91.9	1
4Y99.B	ARG	216	101	37.39	1.03	11.87				112.3	112.3	1
4Y99.B	LYS	217	145.1	61.62	1.02	10.5	7.5	50.2		125.2	67.5	1
4Y99.B	VAL	218	162.6	83.2	-0.06		39.1			91.2	52
4Y99.B	LEU	219	38.1	16.79	-0.03		2.5			48.6	46.1
4Y99.B	ALA	220	67.1	48.89	0.04		7.4			56	48.6
4Y99.B	ILE	221	2.2	0.97	-0.04					14.9	14.9
4Y99.B	ASP	222	120.2	68.03	-1.08	3.8			41.3	75.3	34.1	-1
4Y99.B	HIS	223	147.6	67.13	0.13	6.5				96.9	96.9
4Y99.B	LEU	224	19.1	8.43	-0.03					30.8	30.8
4Y99.B	ASN	225	85.5	49.53	0.05					52.9	52.9
4Y99.B	GLU	226	66.4	32	-1.06	4.5				46.6	46.6	-1
4Y99.B	ASP	227	91.6	51.87	-1.09	3.02				57.1	57.1	-1
4Y99.B	GLN	228	84.7	42.4	0.01					66	66
4Y99.B	LEU	229			-0.03
4Y99.B	ARG	230	63.3	23.42	1.03	12.01				69.7	69.7	1
4Y99.B	GLU	231	103.9	50.1	-1.06	4.06				64.3	64.3	-1
4Y99.B	LYS	232	51.9	22.04	1.02	10.29	0.5			50.6	50	1
4Y99.B	ALA	233			0.04
4Y99.B	LYS	234	102.5	43.51	1.02	10.29	11.4			77.1	65.6	1
4Y99.B	GLU	235	92.6	44.65	-1.06	3.91				72.7	72.7	-1
4Y99.B	LEU	236	10.3	4.52	-0.03		10.6			17	6.5
4Y99.B	TRP	237	50.4	16.22	0.01		44.4			60.2	15.8
4Y99.B	GLN	238	82.2	41.14	0.01		0.9			63.2	62.4
4Y99.B	THR	239	39.6	22.71	-0.01		7.8			44.1	36.3
4Y99.B	ILE	240	3	1.35	-0.04		10.5			13.3	2.8
4Y99.B	TYR	241	76.7	29.02	0.02	10	23.4			48.9	25.5
4Y99.B	ASN	242	63.7	36.89	0.05					52.9	52.9
4Y99.B	LEU	243	15	6.6	-0.03		5.8			23.6	17.8
4Y99.B	GLU	244	0.4	0.21	-1.06	1.93				2.1	2.1	-1
4Y99.B	ALA	245	15.4	11.23	0.04		2.5			17.4	14.9
4Y99.B	GLU	246	82.8	39.93	-1.06	4.71				63.6	63.6	-1
4Y99.B	LYS	247	21.2	8.99	1.02	12.4		15.6		27	11.4	1
4Y99.B	PHE	248	4.2	1.59	0.02				0.5	13.7	13.2
4Y99.B	ASP	249	65	36.81	-1.09	3.28				48.9	48.9	-1
4Y99.B	LEU	250	26.7	11.75	-0.03		14.7			31.2	16.4
4Y99.B	GLN	251	51	25.52	0.01		0.9	15.7		55.4	38.8
4Y99.B	GLU	252	18	8.68	-1.06	3.67			11	34.5	23.5	-1
4Y99.B	LYS	253	97.6	41.44	1.02	10.5	5.8	42.6		75.3	27	1
4Y99.B	PHE	254	49.7	18.98	0.02		31.8	10.5		48.1	5.8
4Y99.B	LYS	255	120.9	51.35	1.02	10.29	13.5		2.5	94.4	78.4	1
4Y99.B	GLN	256	50.6	25.3	0.01				2.8	62.4	59.6
4Y99.B	GLN	257	2.6	1.32	0.01			5.8		14.7	8.8
4Y99.B	LYS	258	89.4	37.96	1.02	10.15	14.3	28.5		70.8	28.1	1
4Y99.B	TYR	259	23.3	8.82	0.02					36.1	36.1
4Y99.B	GLU	260	34.7	16.73	-1.06	4.57			20.7	44.7	24	-1
4Y99.B	ILE	261	0.9	0.39	-0.04					4.4	4.4
4Y99.B	ASN	262	58.6	33.94	0.05					51	51
4Y99.B	VAL	263	7	3.56	-0.06					22.8	22.8
4Y99.B	LEU	264	14.7	6.47	-0.03					17.3	17.3
4Y99.B	ARG	265	126.6	46.89	1.03	12.15		22.1		97.2	75	1
4Y99.B	ASN	266	35	20.28	0.05					37.9	37.9
4Y99.B	ARG	267	12.4	4.58	1.03					41.4	41.4	1
4Y99.B	ILE	268	15.9	7.13	-0.04					21	21
4Y99.B	ASN	269	101.3	58.69	0.05					72.5	72.5
4Y99.B	ASP	270	61	34.55	-1.09	3.16				54.4	54.4	-1
4Y99.B	ASN	271	35.8	20.76	0.05					37.2	37.2
4Y99.B	GLN	272	173.1	86.63	-0.01					101.4	101.4
4Y99.A	ASP	2	85.1	48.18	-0.07	4.88		31.6	21.2	74.7	22
4Y99.A	ASP	3	6.8	3.88	-1.09	3.56		3.7	7.5	23.9	12.7	-1
4Y99.A	ILE	4	59.7	26.88	-0.04		37.8	4.3		64.5	22.4
4Y99.A	TYR	5	64.8	24.53	0.02	10	15.3	13.2		59.5	31
4Y99.A	LYS	6	48.4	20.55	1.02	13.24			5.3	53.4	48.1	1
4Y99.A	ALA	7	1.8	1.29	0.04		0.2			5.8	5.6
4Y99.A	ALA	8	39.4	28.7	0.04		7.6			37.3	29.7
4Y99.A	VAL	9	17.5	8.93	-0.06		6.3			20.4	14.1
4Y99.A	GLU	10	78.5	37.84	-1.06	3.12				60.4	60.4	-1
4Y99.A	GLN	11	126.5	63.29	0.01					87.8	87.8
4Y99.A	LEU	12	27.4	12.06	-0.03		10.4			30	19.6
4Y99.A	THR	13	77.8	44.58	-0.01				1.3	50.4	49
4Y99.A	GLU	14	143.8	69.32	-1.06	4.5			44	90.3	46.3	-1
4Y99.A	GLU	15	108.9	52.51	-1.06	4.23			41.6	70.5	28.9	-1
4Y99.A	GLN	16	40.3	20.14	0.01		0.3			35	34.7
4Y99.A	LYS	17	68.3	29.01	1.02	10.43	3.5			60	56.5	1
4Y99.A	ASN	18	81.3	47.08	0.05				1.7	62.3	60.6
4Y99.A	GLU	19	15	7.24	-1.06	1.8			11.3	25.1	13.8	-1
4Y99.A	PHE	20	6.4	2.45	0.02		16.3			19.2	2.9
4Y99.A	LYS	21	91.8	38.99	1.02	10.29	9.7			69.4	59.7	1
4Y99.A	ALA	22	19.9	14.48	0.04			0.2		27.5	27.2
4Y99.A	ALA	23			0.04
4Y99.A	PHE	24	9.4	3.6	0.02					13.2	13.2
4Y99.A	ASP	25	56.4	31.94	-1.09	3.42				46.9	46.9	-1
4Y99.A	ILE	26	46.6	20.96	-0.04		28.9			57.5	28.6
4Y99.A	PHE	27			0.02		3.1			9.3	6.2
4Y99.A	VAL	28	17.2	8.79	-0.06					21.4	21.4
4Y99.A	LEU	29	160.7	70.84	-0.03		59.9			103	43.1
4Y99.A	GLY	30	84.6	84.38	0.05					53.7	53.7
4Y99.A	ALA	31	16.9	12.34	0.04				4.8	28.5	23.7
4Y99.A	GLU	32	202	97.37	-1.06	4.5			44.3	110.4	66.1	-1
4Y99.A	ASP	33	94.8	53.67	-1.09	2.84			26.6	65.9	39.3	-1
4Y99.A	GLY	34	40.7	40.61	0.05					34.9	34.9
4Y99.A	SER	35	6.6	4.55	-0.01				3.5	12.7	9.2
4Y99.A	ILE	36			-0.04
4Y99.A	SER	37	31.3	21.43	-0.01				4.5	27.6	23.1
4Y99.A	THR	38	40.4	23.17	-0.01					37.5	37.5
4Y99.A	LYS	39	155.4	66	1.02	10.5		39.7	0.7	100.2	59.8	1
4Y99.A	GLU	40	5	2.42	-1.06	2.68			4.2	21.3	17.1	-1
4Y99.A	LEU	41			-0.03		2.9			2.9
4Y99.A	GLY	42			0.05					1.1	1.1
4Y99.A	LYS	43	123	52.24	1.02	10.43		52		94.8	42.8	1
4Y99.A	VAL	44			-0.06					6.9	6.9
4Y99.A	MET	45	5.2	2.14	-0.01		10.5			16.7	6.2
4Y99.A	ARG	46	131.2	48.59	1.03	12.15				94.9	94.9	1
4Y99.A	MET	47	119.9	49	-0.01		28.2	5		86.6	53.5
4Y99.A	LEU	48	25.1	11.08	-0.03		8.1			34.1	26
4Y99.A	GLY	49	71.5	71.27	0.05					42.8	42.8
4Y99.A	GLN	50	62.7	31.37	0.01					55.1	55.1
4Y99.A	ASN	51	134.6	77.97	0.05				5.9	86.7	80.8
4Y99.A	PRO	52	12.8	7.45	-0.17				2.6	33.3	30.7
4Y99.A	THR	53	69.5	39.83	-0.01				7	48.2	41.2
4Y99.A	PRO	54	108.3	63.1	-0.17				1.1	64.4	63.3
4Y99.A	GLU	55	131.9	63.57	-1.06	3.54			31.7	77.7	46	-1
4Y99.A	GLU	56	82.8	39.94	-1.06	2.83			29	59.5	30.5	-1
4Y99.A	LEU	57	2.2	0.95	-0.03					12.9	12.9
4Y99.A	GLN	58	74.2	37.13	0.01				11	59.4	48.4
4Y99.A	GLU	59	103.6	49.94	-1.06	4.5			47.9	67.4	19.5	-1
4Y99.A	MET	60	8.2	3.36	-0.01		9.8			33.5	23.7
4Y99.A	ILE	61			-0.04
4Y99.A	ASP	62	80.3	45.46	-1.08	4.15			41.3	57.7	16.4	-1
4Y99.A	GLU	63	70.4	33.93	-1.06	3.58			20.1	59.6	39.6	-1
4Y99.A	VAL	64	2.3	1.19	-0.06				2.1	11.6	9.5
4Y99.A	ASP	65	23.9	13.5	-1.09	1.41			20	25.2	5.1	-1
4Y99.A	GLU	66	26.9	12.96	-1.05	5.24			17	44	27	-1
4Y99.A	ASP	67	25.3	14.3	-1.09	2.83				24.9	24.9	-1
4Y99.A	GLY	68	31.2	31.15	0.05				0.3	35	34.7
4Y99.A	SER	69	41.7	28.62	-0.01					37.7	37.7
4Y99.A	GLY	70	33	32.92	0.05				2.9	30.6	27.7
4Y99.A	THR	71	17.8	10.23	-0.01				8.2	29.7	21.5
4Y99.A	VAL	72			-0.06
4Y99.A	ASP	73	46.1	26.11	-1.09	2.24				33.5	33.5	-1
4Y99.A	PHE	74	39.2	14.96	0.02		20.2			42	21.9
4Y99.A	ASP	75	81.9	46.36	-1.08	3.8				53.9	53.9	-1
4Y99.A	GLU	76			-0.13	8.12						-1
4Y99.A	PHE	77			0.02		0.2			0.2
4Y99.A	LEU	78	5.3	2.31	-0.03		9.9			12.9	2.9
4Y99.A	VAL	79	1.3	0.65	-0.06				0.6	8	7.5
4Y99.A	MET	80	9.2	3.76	-0.01		9.4			30	20.6
4Y99.A	MET	81	6.3	2.57	-0.01		10.6			14.8	4.1
4Y99.A	VAL	82	15.3	7.81	-0.06		6.6			30	23.4
4Y99.A	ARG	83	76.9	28.46	1.03	11.87		24.6		79.3	54.6	1
4Y99.A	SER	84	34	23.3	-0.01					43.1	43.1
4Y99.A	MET	85	140	57.23	-0.01		15.6		7.9	100.8	77.3
4Y99.A	GLY	91	80.5	80.28	1.06	7.72		27.8		52.6	24.8	1
4Y99.A	LYS	92	34.6	14.71	1.02	10.01		11		45.3	34.3	1
4Y99.A	SER	93	70.4	48.3	-0.01					47.7	47.7
4Y99.A	GLU	94	97.8	47.16	-1.06	2.82				67.3	67.3	-1
4Y99.A	GLU	95	143.3	69.08	-1.06	4.5			58.3	94.7	36.4	-1
4Y99.A	GLU	96	54.3	26.19	-1.06	3.21			1.3	46.5	45.1	-1
4Y99.A	LEU	97	3.6	1.58	-0.03					9.2	9.2
4Y99.A	SER	98	17.4	11.93	-0.01				0.6	33.5	32.9
4Y99.A	ASP	99	29.9	16.94	-1.09	1.5			22.7	27.2	4.4	-1
4Y99.A	LEU	100	0.9	0.38	-0.03					3.8	3.8
4Y99.A	PHE	101			0.02					4.6	4.6
4Y99.A	ARG	102	29.8	11.03	1.03					53	53	1
4Y99.A	MET	103	13.2	5.41	-0.01					23.8	23.8
4Y99.A	PHE	104			0.02					1.6	1.6
4Y99.A	ASP	105	1	0.57	-1.09	3.47				4.8	4.8	-1
4Y99.A	LYS	106	101.7	43.19	1.02	11.84	12.1			78.6	66.4	1
4Y99.A	ASN	107	101.3	58.7	0.05					66.3	66.3
4Y99.A	ALA	108	58.5	42.59	0.04					40.2	40.2
4Y99.A	ASP	109	47.5	26.89	-1.09	2.56				39.5	39.5	-1
4Y99.A	GLY	110			0.05					3.4	3.4
4Y99.A	TYR	111	6.7	2.55	0.02	13.62				24.1	24.1
4Y99.A	ILE	112			-0.04					4.4	4.4
4Y99.A	ASP	113	42.9	24.28	-1.09	3.02				32	32	-1
4Y99.A	LEU	114	64.6	28.48	-0.03				4	57.2	53.2
4Y99.A	GLU	115	108.7	52.42	-1.06	4.57	1.2			76.5	75.3	-1
4Y99.A	GLU	116	6.9	3.35	-1.06	5.1	0.4			13.6	13.2	-1
4Y99.A	LEU	117	0.4	0.17	-0.03					3.6	3.6
4Y99.A	LYS	118	81	34.42	1.02	10.5		38.1		60.5	22.4	1
4Y99.A	ILE	119	84.7	38.11	-0.04		42.4			66.9	24.5
4Y99.A	MET	120			-0.01
4Y99.A	LEU	121			-0.03
4Y99.A	GLN	122	102.4	51.26	0.01			12		68.6	56.6
4Y99.A	ALA	123	61.9	45.11	0.04					48	48
4Y99.A	THR	124	21.4	12.29	-0.01					18.4	18.4
4Y99.A	GLY	125	80.5	80.3	0.05					46.7	46.7
4Y99.A	GLU	126	57.3	27.62	-1.06	3.54			28	53.9	25.9	-1
4Y99.A	THR	127	125.3	71.81	-0.01				8.6	75.9	67.3
4Y99.A	ILE	128	26.8	12.07	-0.04					30.3	30.3
4Y99.A	THR	129	76.8	44	-0.01					53.6	53.6
4Y99.A	GLU	130	129.2	62.28	-1.06	4.5			51.8	90.6	38.8	-1
4Y99.A	ASP	131	48.4	27.41	-1.09	3.99			29.6	41.4	11.8	-1
4Y99.A	ASP	132			-1.09	1.94						-1
4Y99.A	ILE	133	4.8	2.18	-0.04					23.4	23.4
4Y99.A	GLU	134	71.1	34.28	-1.06	4.5			38.1	55	16.9	-1
4Y99.A	GLU	135	15.5	7.46	-1.06	3.62				24.9	24.9	-1
4Y99.A	LEU	136			-0.03
4Y99.A	MET	137	5.2	2.11	-0.01					14.6	14.6
4Y99.A	LYS	138	124.5	52.88	1.02	10.5				105.6	105.6	1
4Y99.A	ASP	139	17.5	9.93	-1.09				10.1	35.2	25	-1
4Y99.A	GLY	140			0.05
4Y99.A	ASP	141	4.7	2.63	-1.09	2.69				13.2	13.2	-1
4Y99.A	LYS	142	97.5	41.39	1.02	11.56		35.6		89.4	53.8	1
4Y99.A	ASN	143	82	47.47	0.05					69.3	69.3
4Y99.A	ASN	144	144.4	83.65	0.05					84.2	84.2
4Y99.A	ASP	145	71.6	40.52	-1.09	3.59				55.6	55.6	-1
4Y99.A	GLY	146	38.3	38.15	0.05					34.4	34.4
4Y99.A	ARG	147	82.7	30.64	1.03	11.94				66.6	66.6	1
4Y99.A	ILE	148	0.9	0.39	-0.04					3.6	3.6
4Y99.A	ASP	149	2.4	1.37	-0.29	7.66				15.4	15.4	-1
4Y99.A	TYR	150	5.8	2.18	0.02	12.73				20.9	20.9
4Y99.A	ASP	151	2.7	1.53	-1.09	1.71				18.6	18.6	-1
4Y99.A	GLU	152	7	3.38	-1.06	3.57				20.8	20.8	-1
4Y99.A	PHE	153			0.02					8.1	8.1
4Y99.A	LEU	154	24.9	10.99	-0.03					37.7	37.7
4Y99.A	GLU	155	99.9	48.17	-1.06	3				78.4	78.4	-1
4Y99.A	PHE	156	2.2	0.83	0.02					14.3	14.3
4Y99.A	MET	157			-0.01
4Y99.A	LYS	158	125.1	53.14	1.02	10.5		48.2		106.2	58	1
4Y99.A	GLY	159	16	15.95	0.05			10.1		26	15.9
4Y99.A	VAL	160			-0.06					1.9	1.9
4Y99.A	GLU	161	156.6	75.49	-2.06	3.71			70.4	108.3	37.9	-2
4Y99.A	CA	201								0.9	0.9	2
4Y99.A	CA	202										2
4Y99.A	CA	203										2
