# Supplementary material for: Methacrylate Coatings for Titanium Surfaces to Optimize Biocompatibility
Source: Micromachines (Basel). 2020 Jan 13;11(1):87. doi: 10.3390/mi11010087 (PMC7019220; doi:10.3390/mi11010087)
Supplement: Supplementary file 1 [file micromachines-11-00087-s001.zip › S7.csv]

Chain	Res	UID	res_ASA	res_exp	res_charge	propKa	res_hyd	res_pos	res_neg	res_tot	res_oth	ens_res_charge	ens_sc_pKa	ens_bb_pKa
253L.A	MET	1	73.4	30.01	1.74	7.86		29		56.2	27.2	1
253L.A	ASN	2	73.5	42.56	0.05			5		44.9	40
253L.A	ILE	3	17.6	7.92	-0.04		15.4			27.5	12.1
253L.A	PHE	4	84	32.06	0.03		46.9			67.3	20.4
253L.A	GLU	5	89.6	43.22	-1.05	4.21				63.7	63.7	-1
253L.A	MET	6			0
253L.A	LEU	7			-0.03
253L.A	ARG	8	82.2	30.44	1.03	11.94	2.5	33.8		69.3	33	1
253L.A	ILE	9	50.8	22.87	-0.04				12.6	57.3	44.7
253L.A	ASP	10	20	11.3	-1.08				7.8	15.6	7.8	-1
253L.A	GLU	11	31.6	15.24	-1.06	2.88			23.6	28.9	5.3	-1
253L.A	GLY	12	25.8	25.73	0.05			1		17.3	16.3
253L.A	LEU	13	39.5	17.42	-0.03			13.6		41.4	27.8
253L.A	ARG	14	131.6	48.71	1.03	12.22		47.7		90.6	42.9	1
253L.A	LEU	15	67.8	29.88	-0.03			7.7		51	43.2
253L.A	LYS	16	110.6	46.97	1.03	10.29		56.7		78.4	21.8	1
253L.A	ILE	17	18.9	8.52	-0.04		3.4			26.8	23.4
253L.A	TYR	18	26.4	9.99	0.03	10.4		3.9		41.8	37.8
253L.A	LYS	19	134.8	57.25	1.03	10.5	0.3	47.3		90	42.4	1
253L.A	ALA	20	22.5	16.36	0.05					28.4	28.4
253L.A	THR	21	117.2	67.21	-0.01					89	89
253L.A	GLU	22	102.9	49.6	-1.05	4.57	1.7		38.3	86.2	46.2	-1
253L.A	GLY	23	33.2	33.14	0.05					26.4	26.4
253L.A	TYR	24	74.1	28.03	0.03	11.18	14.9		2.6	65.4	47.9
253L.A	TYR	25	23.2	8.77	0.02	10	8.8			25.2	16.3
253L.A	THR	26	3.2	1.84	-0.01					12.8	12.8
253L.A	ILE	27			-0.04
253L.A	GLY	28			0.05
253L.A	ILE	29			-0.04		2.2			4.6	2.4
253L.A	GLY	30	11.3	11.27	0.05				9.7	19.3	9.7
253L.A	HIS	31	29.5	13.43	0.75	7.63			8.4	34.4	26
253L.A	LEU	32	75.8	33.41	-0.03		33.1		4.5	74	36.4
253L.A	LEU	33	13.5	5.97	-0.03				7.3	16.6	9.3
253L.A	THR	34	22.3	12.8	-0.01			0.6		19.3	18.7
253L.A	LYS	35	148.1	62.89	1.03	10.5	1.9	61.3		96.9	33.8	1
253L.A	SER	36	43.8	30.05	-0.01			3.7		33.3	29.6
253L.A	PRO	37	141.7	82.54	-0.16					83	83
253L.A	SER	38	44.9	30.78	-0.01					33.8	33.8
253L.A	LEU	39	78.4	34.53	-0.03		36.2			61.7	25.5
253L.A	ASN	40	102.5	59.39	0.05					63.5	63.5
253L.A	ALA	41	39.4	28.71	0.05					30.6	30.6
253L.A	ALA	42			0.05
253L.A	LYS	43	66.7	28.34	1.03	10.36				63.9	63.9	1
253L.A	SER	44	69.8	47.9	-0.01					50.3	50.3
253L.A	GLU	45	51.1	24.64	-1.06	3.91			25.4	41.7	16.3	-1
253L.A	LEU	46			-0.03
253L.A	ASP	47	29.5	16.71	-1.08	2.66				31.9	31.9	-1
253L.A	LYS	48	158	67.1	1.03	10.29				101	101	1
253L.A	ALA	49	44.6	32.5	0.05					38.9	38.9
253L.A	ILE	50	27.1	12.18	-0.04					35.2	35.2
253L.A	GLY	51	67.7	67.5	0.05					42.9	42.9
253L.A	ARG	52	112.3	41.59	1.03	11.87				89.4	89.4	1
253L.A	ASN	53	134.4	77.82	0.05					83	83
253L.A	THR	54	4.5	2.56	-0.01					7.7	7.7
253L.A	ASN	55	118.4	68.59	0.05					80.4	80.4
253L.A	GLY	56	5.4	5.36	0.05		0.9			10.1	9.3
253L.A	VAL	57	64.2	32.86	-0.06			4		50.1	46.1
253L.A	ILE	58	2	0.9	-0.04					4.5	4.5
253L.A	THR	59	74	42.41	-0.01					44.4	44.4
253L.A	LYS	60	119.2	50.61	1.03	10.43		37.1	1.5	86.6	48	1
253L.A	ASP	61	109.3	61.89	-1.08	3.78			45.6	71.8	26.2	-1
253L.A	GLU	62	30.7	14.79	-1.06	3.01				30.3	30.3	-1
253L.A	ALA	63			0.05
253L.A	GLU	64	67.8	32.71	-1.05	4.64			31.7	56	24.3	-1
253L.A	LYS	65	142	60.31	1.03	10.5		45.1		96.6	51.5	1
253L.A	LEU	66			-0.03					9	9
253L.A	PHE	67	4.7	1.81	0.03		9.1			12.5	3.4
253L.A	ASN	68	76.1	44.05	0.05					55.2	55.2
253L.A	GLN	69	88.9	44.47	0.01				0.2	77	76.9
253L.A	ASP	70	23.4	13.24	-1.08	1.14			18.5	32.5	14	-1
253L.A	VAL	71	3.6	1.86	-0.06		7.1			12.3	5.1
253L.A	ASP	72	84.3	47.73	-1.08	3.87			40.1	60.8	20.6	-1
253L.A	ALA	73	65	47.35	0.05					49.5	49.5
253L.A	ALA	74	7.6	5.53	0.05					14.7	14.7
253L.A	VAL	75	35.8	18.31	-0.06		23.9			34	10.1
253L.A	ARG	76	137.8	51.03	1.03	12.36		49.5		100.4	50.9	1
253L.A	GLY	77	11	10.96	0.05					20.5	20.5
253L.A	ILE	78			-0.04
253L.A	LEU	79	65.3	28.77	-0.03		32.9	0.4		50.8	17.6
253L.A	ARG	80	182.2	67.48	1.03	12.29		55.4		125	69.6	1
253L.A	ASN	81	23.7	13.75	0.05					24.9	24.9
253L.A	ALA	82	97.6	71.11	0.05					61.2	61.2
253L.A	LYS	83	135.1	57.37	1.03	10.5		48.8		94.7	45.9	1
253L.A	LEU	84			-0.03
253L.A	LYS	85	86.1	36.58	1.03	10.29				61.2	61.2	1
253L.A	PRO	86	61.3	35.69	-0.16					50.9	50.9
253L.A	VAL	87	1.1	0.58	-0.06					5.3	5.3
253L.A	TYR	88	32.8	12.41	0.02	10.19	4.6			28.2	23.6
253L.A	ASP	89	72.4	40.98	-1.08	3.35				51.5	51.5	-1
253L.A	SER	90	47.9	32.82	-0.01					36.2	36.2
253L.A	LEU	91	3.4	1.5	-0.03					8.1	8.1
253L.A	ASP	92	64.5	36.53	-1.08	1.51				45	45	-1
253L.A	ALA	93	82.2	59.86	0.05					53.6	53.6
253L.A	VAL	94	24.4	12.48	-0.06					29.3	29.3
253L.A	ARG	95	20.3	7.5	1.03	10.96		10.6		21.7	11.1	1
253L.A	ARG	96	72.2	26.75	1.03	11.87				57.8	57.8	1
253L.A	ALA	97	7.1	5.2	0.05					8.1	8.1
253L.A	ALA	98			0.05
253L.A	LEU	99			-0.03					2.7	2.7
253L.A	ILE	100	8.1	3.64	-0.04		9.9			14.5	4.6
253L.A	ASN	101			0.05
253L.A	MET	102			0					6.1	6.1
253L.A	VAL	103	2.7	1.41	-0.06					9.9	9.9
253L.A	PHE	104	23.9	9.13	0.03				18.3	34.8	16.5
253L.A	GLN	105	51.3	25.69	0.01				8.7	46.5	37.7
253L.A	MET	106	52.6	21.5	0					44.4	44.4
253L.A	GLY	107	31.9	31.82	0.05					21.9	21.9
253L.A	GLU	108	54.5	26.28	-1.05	4.18				44.1	44.1	-1
253L.A	THR	109	135.1	77.45	-0.01					74.7	74.7
253L.A	GLY	110	29.1	29	0.05					27.2	27.2
253L.A	VAL	111			-0.06					3.9	3.9
253L.A	ALA	112	14.4	10.5	0.05					16.6	16.6
253L.A	GLY	113	54.1	53.97	0.05					40.5	40.5
253L.A	PHE	114	35.4	13.52	0.03					52.4	52.4
253L.A	THR	115	76.5	43.85	-0.01					60.2	60.2
253L.A	ASN	116	71.6	41.47	0.05			19.2		48.7	29.5
253L.A	SER	117			-0.01					4.9	4.9
253L.A	LEU	118	3.5	1.53	-0.03					22.6	22.6
253L.A	ARG	119	122.4	45.3	1.03	12.08		29.4		92.3	62.9	1
253L.A	MET	120	26.6	10.88	0			5.8		27.9	22.1
253L.A	LEU	121			-0.03					3.6	3.6
253L.A	GLN	122	76.9	38.49	0.01					60.7	60.7
253L.A	GLN	123	89.8	44.94	0.01			8.1		67.5	59.3
253L.A	LYS	124	111.4	47.3	1.03	10.15		26.5		81.2	54.7	1
253L.A	ARG	125	119.1	44.11	1.03	12.15		25.9		80.5	54.6	1
253L.A	TRP	126	53.5	17.22	0.02			8.1		42.7	34.6
253L.A	ASP	127	88	49.83	-1.08	3.82				56.7	56.7	-1
253L.A	GLU	128	87.7	42.26	-1.05	4.37				66.4	66.4	-1
253L.A	ALA	129			0.05
253L.A	ALA	130			0.05					3.5	3.5
253L.A	VAL	131	84.3	43.15	-0.06			1.7		62.4	60.8
253L.A	ASN	132	26.3	15.24	0.05			18.2		37.9	19.7
253L.A	LEU	133	0.9	0.4	-0.03					7.6	7.6
253L.A	ALA	134	21.6	15.71	0.05					28.8	28.8
253L.A	LYS	135	170.2	72.29	1.03	10.5		42.9		108.1	65.1	1
253L.A	SER	136	20.1	13.77	-0.01					25.7	25.7
253L.A	ARG	137	177.2	65.63	1.03	12.22			0.2	123.7	123.5	1
253L.A	TRP	138	11	3.53	0.02					27.6	27.6
253L.A	TYR	139	44.7	16.89	0.01	9.27		7.6		36.5	28.8
253L.A	ASN	140	96.8	56.05	0.05					68.4	68.4
253L.A	GLN	141	85.9	43	0.01					70.3	70.3
253L.A	THR	142	21.1	12.1	-0.01			2.1		42.5	40.4
253L.A	PRO	143	60.7	35.36	-0.16			1.7		46.4	44.7
253L.A	ASN	144	109.4	63.34	0.05			19.5		65.1	45.6
253L.A	ARG	145	17.1	6.34	1.03	13.91		6.7		31.7	25.1	1
253L.A	ALA	146			0.05
253L.A	LYS	147	100.9	42.84	1.03	10.29		30.3		73.3	43	1
253L.A	ARG	148	39.7	14.71	1.03			20.3		45.4	25.2	1
253L.A	VAL	149			-0.06
253L.A	ILE	150	9	4.04	-0.04					16.4	16.4
253L.A	THR	151	45.6	26.16	-0.01					38.7	38.7
253L.A	THR	152			-0.01
253L.A	PHE	153			0.03					0.5	0.5
253L.A	ARG	154	85.1	31.53	1.03	11.59				74.2	74.2	1
253L.A	THR	155	62.9	36.05	-0.01					49.2	49.2
253L.A	GLY	156	14.2	14.2	0.05					15.7	15.7
253L.A	THR	157	51.6	29.57	-0.01			2.2		36.9	34.7
253L.A	TRP	158	36.7	11.79	0.02			17.8		36.1	18.3
253L.A	ASP	159	78	44.14	-1.08	2.85				56	56	-1
253L.A	ALA	160	22.4	16.32	0.05					21.9	21.9
253L.A	TYR	161	1	0.37	0.03	12.6			0.9	2.9	2
253L.A	LYS	162	117.3	49.83	1.03	9.87		28		87.3	59.4	1
253L.A	ASN	163	170.6	98.8	0.05				13	102.9	89.9
253L.A	LEU	164	129.5	57.07	-1.02	3.34		0.2	39.1	87.7	48.5	-1
