# Supplementary material for: Methacrylate Coatings for Titanium Surfaces to Optimize Biocompatibility
Source: Micromachines (Basel). 2020 Jan 13;11(1):87. doi: 10.3390/mi11010087 (PMC7019220; doi:10.3390/mi11010087)
Supplement: Supplementary file 1 [file micromachines-11-00087-s001.zip › S8.csv]

Chain	Res	UID	res_ASA	res_exp	res_charge	propKa	res_hyd	res_pos	res_neg	res_tot	res_oth	ens_res_charge	ens_sc_pKa	ens_bb_pKa
GelMA2	ALA	81	151.5	110.39	1.69	7.93		64.8		77.8	13	2
GelMA2	PRO	82	137.8	80.28	0.25			62.4		77.7	15.3	1
GelMA2	GLY	83	52.8	52.61	0.63			11.9	2.5	33.7	19.2	1
GelMA2	ASP	84	29.5	16.71	-0.59	4.67		2.6	0.5	38.3	35.2
GelMA2	LYS	85	44.2	18.75	-3.2	7.56			5.4	41.2	35.8	-4
GelMA2	GLY	86	14.4	14.4	-2.5	4.9				8.2	8.2	-3
GelMA2	PRO	87	101.8	59.28	0.25			23.7		66.5	42.8	1
GelMA2	PRO	88	80	46.6	0.25				2.3	49.1	46.9	1
GelMA2	GLY	89	35.6	35.51	0.4				7.9	27.3	19.4
GelMA2	PRO	183	210.3	122.49	1.28	7.93		106.9		107.2	0.2	2
GelMA2	ARG	184	246.9	91.43	1.52	12.36		137.2		144.8	7.6	3
GelMA2	GLY	185	59.6	59.4	0.63			38.2		41.5	3.4	1
GelMA2	ASP	186	102.4	57.99	-0.59	2.67		38.4		64.9	26.5
GelMA2	LYS	187	133.7	56.77	-0.74	6.51		70.2		114.9	44.7	1
GelMA2	GLY	188	7.4	7.38	-1.14					12.3	12.3	-1
GelMA2	ASP	189	101	57.17	-0.59	4.74		12.1		64.4	52.3
GelMA2	HIS	190	197.1	89.63	0.61	6.43		102.6		113.8	11.2	1
GelMA2	GLY	191	47.9	47.77	0.63			32.6		36.7	4.1	1
GelMA2	ASP	192	78.7	44.55	-0.65	5.61		44.7		55.1	10.5	-1
GelMA2	GLY	173	126.7	126.35	1.81	7.93		62.7		66.7	4.1	2
GelMA2	LYS	174	195	82.8	1.04	6.58		103.3		131.3	28	3
GelMA2	ARG	175	160	59.25	1.12	12.5		95.3		101.3	5.9	2
GelMA2	GLY	176	23.4	23.34	0.63			30.8		37.3	6.4	1
GelMA2	LEU	177	202.3	89.13	0.46			118.5		121	2.5	1
GelMA2	LEU	178	219.4	96.69	0.46			118		124.2	6.2	1
GelMA2	GLY	179	65	64.81	0.63			43		50.8	7.7	1
GelMA2	PRO	180	159	92.58	0.25			80.7		89	8.3	1
GelMA2	GLN	181	185.9	93.01	0.51			90.2		119.3	29	1
GelMA2	GLY	182	59	58.83	0.63			39.5		48.5	9	1
GelMA2	PRO	183	174.2	101.43	0.25			81.5		92.2	10.6	1
GelMA2	ARG	184	224.4	83.09	1.52	12.43		138.6		146.7	8.1	3
GelMA2	GLY	185	77	76.8	0.63			42.5		44	1.5	1
GelMA2	ASP	186	83.1	47.06	-0.59	2.48		54.3		68.9	14.6
GelMA2	LYS	187	227.6	96.66	1.52	10.29		127.7		135.7	8	3
GelMA2	GLY	188	85.3	85.07	0.63			42.5		53.9	11.4	1
GelMA2	ASP	189	127.3	72.04	-0.59	2.56		32.3		85.2	52.9
GelMA2	HIS	190	207.1	94.2	0.62	6.5		74.1		121.5	47.4	1
GelMA2	GLY	191	63.6	63.44	0.63			26.2		41.1	14.9	1
GelMA2	ASP	192	102.7	58.15	-0.59	2.9		42.5		75.4	32.9
GelMA2	ARG	193	260.2	96.33	1.52	12.29		130.7		145.8	15.1	3
GelMA2	GLY	194	27.9	27.82	0.63			20.3		34.7	14.4	1
GelMA2	ASP	195	74.5	42.17	-0.59	3.07		1.5		55.9	54.4
GelMA2	ARG	196	171.8	63.6	1.52	12.15		76.8	2.6	103.8	24.4	3
GelMA2	GLY	197	23.6	23.56	0.63					22.8	22.8	1
GelMA2	GLN	198	95.7	47.89	0.51					67.8	67.8	1
GelMA2	LYS	199	36.7	15.57	-10.53	7.21			18	39.4	21.4	-11
GelMA2	GLY	200	40.4	40.26	-0.04	5.04				26	26
GelMA2	HIS	201	143.5	65.26	0.62	6.5		41.3		86.3	45	1
GelMA2	ARG	202	84.9	31.43	1.52	11.8				64.5	64.5	3
GelMA2	GLY	203	96.7	96.41	-0.28	3.39		13.2		56	42.8
