# Supplementary material for: Methacrylate Coatings for Titanium Surfaces to Optimize Biocompatibility
Source: Micromachines (Basel). 2020 Jan 13;11(1):87. doi: 10.3390/mi11010087 (PMC7019220; doi:10.3390/mi11010087)
Supplement: Supplementary file 1 [file micromachines-11-00087-s001.zip › S9.csv]

Chain	Res	UID	res_ASA	res_exp	res_charge	propKa	res_hyd	res_pos	res_neg	res_tot	res_oth	ens_res_charge	ens_sc_pKa	ens_bb_pKa
MeTro1.B	GLY	199	90.8	90.48	1.08	7.86		45.8		57.6	11.8	1
MeTro1.B	LYS	200	315.9	134.18	0.19			74.1		195.1	121	1
MeTro1.B	ARG	201	210.8	78.06	1.05	12.5		78.1		131.2	53.1	1
MeTro1.B	GLN	202	125.7	62.91	0.02			12.6	0.9	88.6	75.1
MeTro1.B	THR	203	95.8	54.94	0		6.5			64.5	58
MeTro1.B	GLU	204	111.1	53.54	-1.04	4.57			38.7	84.9	46.2	-1
MeTro1.B	ARG	205	158.9	58.85	1.05	12.5	1.5	59		114.3	53.7	1
MeTro1.B	GLU	206	120.4	58.06	-1.04	4.5			45.3	87.1	41.9	-1
MeTro1.B	LYS	207	129.4	54.96	1.04	10.5	11.3	49.3		92.3	31.6	1
MeTro1.B	LYS	208	218.4	92.74	0.19		37.6	49.2		145	58.2	1
MeTro1.B	LYS	209	154.4	65.56	1.04	10.5		57.2		104	46.8	1
MeTro1.B	LYS	210	259.3	110.13	0.19		1.1			163.4	162.3	1
MeTro1.B	ILE	211	77	34.63	-0.03		42	0.6		65.1	22.5
MeTro1.B	LEU	212	86.9	38.28	-0.02		40.7	2.1		67.5	24.7
MeTro1.B	ALA	213	46	33.53	0.06			1		36.9	35.9
MeTro1.B	GLU	214	120.2	57.96	-1.04	4.71				87.1	87.1	-1
MeTro1.B	ARG	215	140.9	52.16	1.05	12.5				126.6	126.6	1
MeTro1.B	ARG	216	164.8	61.01	1.05	12.01		43.6		121.2	77.6	1
MeTro1.B	LYS	217	203.3	86.35	0.19		14.6	37		181.1	129.4	1
MeTro1.B	VAL	218	156.5	80.1	-0.05		40.8			94.7	54
MeTro1.B	LEU	219	102.3	45.11	-0.02		43.3			87.3	44
MeTro1.B	ALA	220	57.5	41.89	0.06		7.5			50.4	42.9
MeTro1.B	ILE	221	66	29.7	-0.03		37.1		3.2	57.4	17.1
MeTro1.B	ASP	222	156.5	88.62	-1.07	3.8			58.8	88.3	29.5	-1
MeTro1.B	HIS	223	146.5	66.64	0.15	6.5	7.3			96.9	89.6
MeTro1.B	LEU	224	15.8	6.97	-0.02		7.7		9.1	31.8	15
MeTro1.B	ASN	225	89.5	51.86	0.06					57.6	57.6
MeTro1.B	GLU	226	134	64.63	-1.04	4.57			39.2	81.9	42.7	-1
MeTro1.B	ASP	227	91.6	51.87	-1.07	3.02				57.9	57.9	-1
MeTro1.B	GLN	228	79.6	39.85	0.02		0.5			61.5	60.9
MeTro1.B	LEU	229	72.2	31.81	-0.02		35.9			59.6	23.6
MeTro1.B	ARG	230	135.8	50.28	1.05	12.08				105.9	105.9	1
MeTro1.B	GLU	231	95.5	46.02	-1.04	4.06				65.5	65.5	-1
MeTro1.B	LYS	232	115.9	49.21	0.19		37.8			97.6	59.8	1
MeTro1.B	ALA	233	59.3	43.22	0.06					43.5	43.5
MeTro1.B	LYS	234	134.8	57.23	1.04	10.29				94.9	94.9	1
MeTro1.B	GLU	235	55.8	26.92	-1.04	5.2				48.5	48.5	-1
MeTro1.B	LEU	236	72.8	32.08	-0.02		47.6			63.6	15.9
MeTro1.B	TRP	237	164.1	52.77	0.02		83.4			111	27.6
MeTro1.B	GLN	238	82.2	41.14	0.02		0.5			60.6	60.1
MeTro1.B	THR	239	53.5	30.67	0		7.9			54.1	46.3
MeTro1.B	ILE	240	103.9	46.75	-0.03		49.6			76.9	27.3
MeTro1.B	TYR	241	133.5	50.53	0.03	10	47.3			85.5	38.2
MeTro1.B	ASN	242	63.7	36.89	0.06				0.2	53.3	53.1
MeTro1.B	LEU	243	87.1	38.4	-0.02		34.4		0.3	74.6	39.8
MeTro1.B	GLU	244	80.5	38.81	-1.04	4.64				64.1	64.1	-1
MeTro1.B	ALA	245	49.2	35.81	0.06		8		3.4	45.1	33.7
MeTro1.B	GLU	246	95.2	45.88	-1.04	4.64			40.8	74.6	33.9	-1
MeTro1.B	LYS	247	205.4	87.21	0.19					137.9	137.9	1
MeTro1.B	PHE	248	135.6	51.76	0.04		54.7		2.8	90.5	33
MeTro1.B	ASP	249	90	50.97	-1.07	3.94			36.8	60.1	23.3	-1
MeTro1.B	LEU	250	124.3	54.77	-0.02		56.3			88.1	31.7
MeTro1.B	GLN	251	57.3	28.69	0.02					61.3	61.3
MeTro1.B	GLU	252	72	34.71	-1.04	4.78	0.7			54.3	53.6	-1
MeTro1.B	LYS	253	248.4	105.5	0.19		6.4	52.2		163.9	105.3	1
MeTro1.B	PHE	254	119.4	45.58	0.04		58.8	4.8		85	21.4
MeTro1.B	LYS	255	211	89.62	0.19		54.1			150.6	96.5	1
MeTro1.B	GLN	256	119.2	59.65	0.02					82.3	82.3
MeTro1.B	GLN	257	64.7	32.36	0.02			4.1		58	53.9
MeTro1.B	LYS	258	104	44.15	1.04	10.36	14.1	40.1		80.9	26.7	1
MeTro1.B	TYR	259	158.9	60.14	0.03	10	58.2			101.5	43.4
MeTro1.B	GLU	260	58.5	28.2	-1.04	3.99	0.4			61.5	61.1	-1
MeTro1.B	ILE	261	60.6	27.25	-0.03		26.6	4.4		55.9	24.8
MeTro1.B	ASN	262	78.4	45.39	0.06					58.7	58.7
MeTro1.B	VAL	263	53.4	27.34	-0.05		30.4	0.4		49.7	18.9
MeTro1.B	LEU	264	91	40.12	-0.02		48.5			70.8	22.3
MeTro1.B	ARG	265	162.6	60.19	1.05	12.36		50.8		111	60.1	1
MeTro1.B	ASN	266	75.1	43.52	0.06				12.9	60.6	47.6
MeTro1.B	ARG	267	146.8	54.35	1.05	12.43		52		104.5	52.5	1
MeTro1.B	ILE	268	97.4	43.83	-0.03		46.1			78.8	32.8
MeTro1.B	ASN	269	101.3	58.69	0.06				1.3	72.3	71
MeTro1.B	ASP	270	117.7	66.65	-1.07	3.75			32.8	71.2	38.4	-1
MeTro1.B	ASN	271	126.7	73.39	0.06					80.9	80.9
MeTro1.B	GLN	272	206.1	103.13	0					113.5	113.5
