# Supplementary material for: Methacrylate Coatings for Titanium Surfaces to Optimize Biocompatibility
Source: Micromachines (Basel). 2020 Jan 13;11(1):87. doi: 10.3390/mi11010087 (PMC7019220; doi:10.3390/mi11010087)
Supplement: Supplementary file 1 [file micromachines-11-00087-s001.zip › S10.csv]

Chain	Res	UID	res_ASA	res_exp	res_charge	propKa	res_hyd	res_pos	res_neg	res_tot	res_oth	ens_res_charge	ens_sc_pKa	ens_bb_pKa
MeTro3Lmin.B	GLY	199	82.4	82.14	1.03	7.72		46.4		50.9	4.5	1
MeTro3Lmin.B	LYS	200	194.3	82.51	0.38	6.58		15.1		132.3	117.2	1
MeTro3Lmin.B	ARG	201	188.4	69.76	0.88	12.5		71.9		112	40.2	1
MeTro3Lmin.B	GLN	202	145.4	72.75	-0.01					87	87
MeTro3Lmin.B	THR	203	86.6	49.62	-0.03					58.5	58.5
MeTro3Lmin.B	GLU	204	61.3	29.56	-1.09	4.19				44.5	44.5	-1
MeTro3Lmin.B	ARG	205	164.4	60.86	1	12.29		32.3		111.2	78.9	1
MeTro3Lmin.B	GLU	206	71.2	34.34	-1.09	3.34				49.8	49.8	-1
MeTro3Lmin.B	LYS	207	99.5	42.27	1	10.36				83.2	83.2	1
MeTro3Lmin.B	LYS	208	91.4	38.82	0.36	6.51	25.9			76.8	50.9	1
MeTro3Lmin.B	LYS	209	84.6	35.92	0.87	10.08		26.6		65.1	38.4	1
MeTro3Lmin.B	LYS	210	136.1	57.8	0.36	6.51				109.5	109.5	1
MeTro3Lmin.B	ILE	211	68.1	30.64	-0.13		41.6			62.8	21.2
MeTro3Lmin.B	LEU	212	155.1	68.34	-0.05		61.3			93.7	32.4
MeTro3Lmin.B	ALA	213	53.3	38.83	0.02					34.7	34.7
MeTro3Lmin.B	GLU	214	96.7	46.6	-1.09	4.19				83.8	83.8	-1
MeTro3Lmin.B	ARG	215	176.7	65.41	1	12.29				140.4	140.4	1
MeTro3Lmin.B	ARG	216	203.5	75.34	1	12.5		46.8		137.9	91.1	1
MeTro3Lmin.B	LYS	217	69	29.31	0.4	6.65	4.2			85.9	81.7	1
MeTro3Lmin.B	VAL	218	74.4	38.06	-0.13					58.2	58.2
MeTro3Lmin.B	LEU	219	146.2	64.43	-0.05		59.7			95.7	36
MeTro3Lmin.B	ALA	220	61.7	44.93	0.02					44.8	44.8
MeTro3Lmin.B	ILE	221	57.9	26.04	-0.06		41			53.5	12.5
MeTro3Lmin.B	ASP	222	126.2	71.47	-1.11	1.98				77.6	77.6	-1
MeTro3Lmin.B	HIS	223	161.9	73.63	0.09	6.43				97.4	97.4
MeTro3Lmin.B	LEU	224	72.3	31.88	-0.05					59.6	59.6
MeTro3Lmin.B	ASN	225	82.3	47.67	0.03					55.3	55.3
MeTro3Lmin.B	GLU	226	115	55.44	-1.09	3.84	0.7			70.7	70	-1
MeTro3Lmin.B	ASP	227	73.6	41.68	-1.11	1.69				43.4	43.4	-1
MeTro3Lmin.B	GLN	228	86.6	43.35	-0.01					59.3	59.3
MeTro3Lmin.B	LEU	229	47.9	21.11	-0.05		23.1			48.4	25.2
MeTro3Lmin.B	ARG	230	130.3	48.27	1	11.52				100.6	100.6	1
MeTro3Lmin.B	GLU	231	92	44.34	-1.09	4.05				61.8	61.8	-1
MeTro3Lmin.B	LYS	232	103	43.76	0.4	6.65				87	87	1
MeTro3Lmin.B	ALA	233	6.3	4.57	-0.13		1.3			11.1	9.8
MeTro3Lmin.B	LYS	234	129.3	54.92	1	10.15				96.5	96.5	1
MeTro3Lmin.B	GLU	235	62.9	30.33	-1.09	3.57				52	52	-1
MeTro3Lmin.B	LEU	236	35.9	15.84	-0.05		30.1			40.8	10.7
MeTro3Lmin.B	TRP	237	178.1	57.27	-0.01		87.1			124.9	37.8
MeTro3Lmin.B	GLN	238	71.2	35.64	-0.01		0.9			57.2	56.2
MeTro3Lmin.B	THR	239	6.3	3.6	-0.03		8.6			14.4	5.8
MeTro3Lmin.B	ILE	240	122.9	55.31	-0.06		57.6			85.5	27.9
MeTro3Lmin.B	TYR	241	133.9	50.67	0	10	49.4			87.5	38.1
MeTro3Lmin.B	ASN	242	53	30.71	0.03					42	42
MeTro3Lmin.B	LEU	243	103	45.4	-0.05		45.3			79	33.8
MeTro3Lmin.B	GLU	244	79.6	38.37	-1.08	4.99				59.7	59.7	-1
MeTro3Lmin.B	ALA	245	36.2	26.37	0.02		12.6			39.3	26.7
MeTro3Lmin.B	GLU	246	48	23.13	-1.09	3.53				54.9	54.9	-1
MeTro3Lmin.B	LYS	247	150	63.69	0.33	6.37	6.1			103.4	97.3	1
MeTro3Lmin.B	PHE	248	138.4	52.83	-0.13		62.6			88.1	25.5
MeTro3Lmin.B	ASP	249	30.5	17.25	-1.11	4.36				32.3	32.3	-1
MeTro3Lmin.B	LEU	250	108.8	47.94	-0.05		56			82.8	26.8
MeTro3Lmin.B	GLN	251	105.9	52.99	-0.01					73.8	73.8
MeTro3Lmin.B	GLU	252	124.5	60.05	-1.09	4.33				76.3	76.3	-1
MeTro3Lmin.B	LYS	253	146.3	62.13	0.42	6.72	1.4			102.2	100.8	1
MeTro3Lmin.B	PHE	254	102.1	38.97	-0.13		55.2			63.6	8.4
MeTro3Lmin.B	LYS	255	133.9	56.88	0.47	6.86	26.5			96.1	69.6	1
MeTro3Lmin.B	GLN	256	51.4	25.71	-0.13					48.3	48.3
MeTro3Lmin.B	GLN	257	50.2	25.11	-0.01					40.5	40.5
MeTro3Lmin.B	LYS	258	100.2	42.55	1	10.22	18.4			77	58.6	1
MeTro3Lmin.B	TYR	259	161.5	61.11	0	10	52.7			103.9	51.2
MeTro3Lmin.B	GLU	260	69.9	33.69	-1.09	3.57	0.4			50.6	50.2	-1
MeTro3Lmin.B	ILE	261	58.7	26.41	-0.06		27.3			54.7	27.3
MeTro3Lmin.B	ASN	262	77.8	45.05	0.03					54	54
MeTro3Lmin.B	VAL	263	64.2	32.86	-0.08		32.9	0.5		54.2	20.8
MeTro3Lmin.B	LEU	264	86	37.89	-0.05		43.1	0.2		69.4	26
MeTro3Lmin.B	ARG	265	160.4	59.39	1	12.43	1.6	46.9		110.4	61.9	1
MeTro3Lmin.B	ASN	266	74.5	43.12	0.03					58.9	58.9
MeTro3Lmin.B	ARG	267	152	56.28	1	12.43		45.5		100.9	55.4	1
MeTro3Lmin.B	ILE	268	104.6	47.05	-0.06		44			76.9	32.8
MeTro3Lmin.B	ASN	269	102.2	59.22	0.03					66.4	66.4
MeTro3Lmin.B	ASP	270	104.1	58.92	-1.11	3.49				67	67	-1
MeTro3Lmin.B	ASN	271	136.2	78.88	0.03					80.7	80.7
MeTro3Lmin.B	GLN	272	202	101.06	-0.04					113.4	113.4
MeTro3Lmin.B	GLY	199	88	87.7	1.03	7.72		45.5		50.8	5.3	1
MeTro3Lmin.B	LYS	200	225.5	95.78	0.4	6.65		10.3		139.9	129.6	1
MeTro3Lmin.B	ARG	201	155.7	57.66	0.88	12.22		36.9		95.5	58.6	1
MeTro3Lmin.B	GLN	202	102.9	51.47	-0.01					74.6	74.6
MeTro3Lmin.B	THR	203	56.8	32.57	-0.03		2.3			47.5	45.2
MeTro3Lmin.B	GLU	204	64	30.84	-1.09	3.5				55.4	55.4	-1
MeTro3Lmin.B	ARG	205	130.5	48.31	1	11.87				95.6	95.6	1
MeTro3Lmin.B	GLU	206	11.8	5.68	-1.09	4.23	1.2			20.8	19.6	-1
MeTro3Lmin.B	LYS	207	85.1	36.13	1	10.29				69	69	1
MeTro3Lmin.B	LYS	208	174.8	74.25	0.5	6.93		0.5		127.3	126.7	1
MeTro3Lmin.B	LYS	209	135.1	57.37	0.87	10.5		63.8		81.4	17.6	1
MeTro3Lmin.B	LYS	210	103.4	43.89	0.38	6.58	1	0.7		89.7	88	1
MeTro3Lmin.B	ILE	211	88.2	39.69	-0.13		54.7			68.7	14
MeTro3Lmin.B	LEU	212	96.5	42.51	-0.05		37.2			65.3	28.1
MeTro3Lmin.B	ALA	213	38.7	28.2	0.02					37	37
MeTro3Lmin.B	GLU	214	75.1	36.18	-1.09	4.05				63.3	63.3	-1
MeTro3Lmin.B	ARG	215	163.5	60.52	1	12.08				139.9	139.9	1
MeTro3Lmin.B	ARG	216	135.3	50.11	1	11.66				109.3	109.3	1
MeTro3Lmin.B	LYS	217	84.7	35.97	0.42	6.72	2.3			80.2	78	1
MeTro3Lmin.B	VAL	218	82	41.99	-0.13					63.8	63.8
MeTro3Lmin.B	LEU	219	89.3	39.35	-0.05		40.7			72.6	31.9
MeTro3Lmin.B	ALA	220	56.1	40.88	0.02					47.1	47.1
MeTro3Lmin.B	ILE	221	97.9	44.04	-0.06		48.8			70.8	22
MeTro3Lmin.B	ASP	222	123	69.64	-1.11	2.02				76.1	76.1	-1
MeTro3Lmin.B	HIS	223	168.2	76.48	0.09	6.43				103.9	103.9
MeTro3Lmin.B	LEU	224	45.3	19.95	-0.05					51.6	51.6
MeTro3Lmin.B	ASN	225	85.1	49.26	0.03					56.1	56.1
MeTro3Lmin.B	GLU	226	115.7	55.78	-1.09	3.84	0.2			68.8	68.6	-1
MeTro3Lmin.B	ASP	227	74.1	41.96	-1.11	1.68				41.3	41.3	-1
MeTro3Lmin.B	GLN	228	93.1	46.58	-0.01					63.9	63.9
MeTro3Lmin.B	LEU	229	70.4	31.01	-0.05		28.9			57.7	28.8
MeTro3Lmin.B	ARG	230	109.3	40.49	1	11.66				88.2	88.2	1
MeTro3Lmin.B	GLU	231	101.6	49	-1.09	3.83				65.4	65.4	-1
MeTro3Lmin.B	LYS	232	126.1	53.53	0.36	6.51	5.2			101.2	96	1
MeTro3Lmin.B	ALA	233	3.2	2.36	-0.13					10.4	10.4
MeTro3Lmin.B	LYS	234	132.5	56.27	1	10.22				103.8	103.8	1
MeTro3Lmin.B	GLU	235	42.2	20.34	-1.09	4.31	11.1			37.9	26.9	-1
MeTro3Lmin.B	LEU	236	69.9	30.81	-0.05		45.1			59.9	14.9
MeTro3Lmin.B	TRP	237	176.5	56.73	-0.01		85.9			124.4	38.5
MeTro3Lmin.B	GLN	238	47.5	23.75	-0.01		6.8			38.6	31.8
MeTro3Lmin.B	THR	239	37	21.23	-0.03		8.4			34.5	26.1
MeTro3Lmin.B	ILE	240	125.7	56.57	-0.06		58.6			87.6	29
MeTro3Lmin.B	TYR	241	49.5	18.73	0	10.28	36.2			59.8	23.6
MeTro3Lmin.B	ASN	242	32.9	19.08	0.03					41.2	41.2
MeTro3Lmin.B	LEU	243	169.9	74.87	-0.05		59.2			106.5	47.3
MeTro3Lmin.B	GLU	244	78.8	37.98	-1.08	5.06	3.6			48.3	44.7	-1
MeTro3Lmin.B	ALA	245	12.7	9.22	0.02					16	16
MeTro3Lmin.B	GLU	246	66.6	32.12	-1.09	2.77	0.8			61.8	61.1	-1
MeTro3Lmin.B	LYS	247	116.4	49.42	0.35	6.44	3.8			97.6	93.7	1
MeTro3Lmin.B	PHE	248	101.4	38.7	-0.13		47.7			64.4	16.7
MeTro3Lmin.B	ASP	249	102.5	58.02	-1.11	3.87			46.5	68.4	22	-1
MeTro3Lmin.B	LEU	250	162.1	71.42	-0.05		53.9		3.6	98.8	41.2
MeTro3Lmin.B	GLN	251	30.6	15.3	-0.01		2.5			47.3	44.8
MeTro3Lmin.B	GLU	252	70.6	34.06	-1.08	5.13	4.4			50.6	46.2	-1
MeTro3Lmin.B	LYS	253	142.4	60.47	0.36	6.51			12.8	116.6	103.8	1
MeTro3Lmin.B	PHE	254	55.3	21.1	-0.13		32.6		0.6	43.4	10.2
MeTro3Lmin.B	LYS	255	124.2	52.75	1.23					92.9	92.9	2
MeTro3Lmin.B	GLN	256	46	23.01	-0.21					46.7	46.7
MeTro3Lmin.B	GLN	257	39.4	19.69	-0.01		1.4			39.6	38.2
MeTro3Lmin.B	LYS	258	157.4	66.85	1	10.36		44.5		101.4	56.8	1
MeTro3Lmin.B	TYR	259	154.6	58.5	0	9.98	49.3			105.6	56.3
MeTro3Lmin.B	GLU	260	14.3	6.92	-1.09	4.05	0.6		9.4	28.5	18.5	-1
MeTro3Lmin.B	ILE	261	66	29.71	-0.06		35.1	1.4		51.8	15.3
MeTro3Lmin.B	ASN	262	19	10.98	0.03					26.4	26.4
MeTro3Lmin.B	VAL	263	96.9	49.61	-0.08			0.3		67	66.7
MeTro3Lmin.B	LEU	264	88.2	38.85	-0.05		50.9			78.2	27.3
MeTro3Lmin.B	ARG	265	98.9	36.63	1	11.66		18.3		87.4	69.1	1
MeTro3Lmin.B	ASN	266	60.4	34.97	0.03					49.1	49.1
MeTro3Lmin.B	ARG	267	170.2	63	1	12.43		47.5		111.9	64.4	1
MeTro3Lmin.B	ILE	268	115.6	52	-0.06		44.6			80.4	35.8
MeTro3Lmin.B	ASN	269	101	58.5	0.03					66.5	66.5
MeTro3Lmin.B	ASP	270	101.7	57.56	-1.11	2.83				64.2	64.2	-1
MeTro3Lmin.B	ASN	271	124.2	71.94	0.03					78.1	78.1
MeTro3Lmin.B	GLN	272	187.5	93.83	-0.04					111.2	111.2
MeTro3Lmin.B	GLY	199	75.6	75.38	1.03	7.65		44.8		48.4	3.6	1
MeTro3Lmin.B	LYS	200	229.4	97.44	0.4	6.65		49.3		138.9	89.6	1
MeTro3Lmin.B	ARG	201	152.5	56.45	0.88	12.29		1.2		97.8	96.6	1
MeTro3Lmin.B	GLN	202	90.1	45.08	-0.01			1.9		74.3	72.4
MeTro3Lmin.B	THR	203	97.2	55.75	-0.03					61.7	61.7
MeTro3Lmin.B	GLU	204	73.9	35.61	-1.09	4.23				57.8	57.8	-1
MeTro3Lmin.B	ARG	205	180.7	66.9	1	12.5		61.6		124.3	62.7	1
MeTro3Lmin.B	GLU	206	56.5	27.26	-1.09	3.32				50.3	50.3	-1
MeTro3Lmin.B	LYS	207	105.2	44.68	1	10.08	24.3			95.6	71.3	1
MeTro3Lmin.B	LYS	208	132.8	56.38	0.47	6.86	20.9			106.7	85.8	1
MeTro3Lmin.B	LYS	209	117.9	50.07	0.87	10.22				81.7	81.7	1
MeTro3Lmin.B	LYS	210	24.8	10.54	-0.43	6.58			11.2	54.5	43.2	-2
MeTro3Lmin.B	ILE	211	69.9	31.44	-0.22		23.2		14.7	55.6	17.8
MeTro3Lmin.B	LEU	212	37.9	16.69	-0.05					38	38
MeTro3Lmin.B	ALA	213	79.1	57.59	0.02					51.1	51.1
MeTro3Lmin.B	GLU	214	107.8	51.98	-1.09	2.75	4.7		2.4	69.6	62.5	-1
MeTro3Lmin.B	ARG	215	107.4	39.76	1	12.08	0.5			103.7	103.2	1
MeTro3Lmin.B	ARG	216	140.2	51.92	1	12.15				109	109	1
MeTro3Lmin.B	LYS	217	119.8	50.87	0.42	6.72	2.3			103.4	101.1	1
MeTro3Lmin.B	VAL	218	84.5	43.25	-0.13					64.9	64.9
MeTro3Lmin.B	LEU	219	116.3	51.25	-0.05		43.3			79.9	36.6
MeTro3Lmin.B	ALA	220	55.9	40.74	0.02					49.3	49.3
MeTro3Lmin.B	ILE	221	104.9	47.18	-0.06		50.8			73	22.2
MeTro3Lmin.B	ASP	222	121	68.49	-1.11	2.14				73	73	-1
MeTro3Lmin.B	HIS	223	168.5	76.61	0.09	6.43				99.6	99.6
MeTro3Lmin.B	LEU	224	41.6	18.34	-0.05					49.3	49.3
MeTro3Lmin.B	ASN	225	83.2	48.18	0.03					55.7	55.7
MeTro3Lmin.B	GLU	226	119.2	57.48	-1.09	3.71	0.5			74.7	74.2	-1
MeTro3Lmin.B	ASP	227	78.5	44.44	-1.11	1.63				44.4	44.4	-1
MeTro3Lmin.B	GLN	228	98.1	49.08	-0.01					62.6	62.6
MeTro3Lmin.B	LEU	229	91.6	40.37	-0.05		35.6			69.7	34.1
MeTro3Lmin.B	ARG	230	132.8	49.16	1	11.59				104.8	104.8	1
MeTro3Lmin.B	GLU	231	103.5	49.89	-1.09	4.05				65.1	65.1	-1
MeTro3Lmin.B	LYS	232	50.7	21.53	0.42	6.72	3.8			63.5	59.7	1
MeTro3Lmin.B	ALA	233	33.4	24.3	-0.13					27.2	27.2
MeTro3Lmin.B	LYS	234	116.2	49.35	1	9.73				96.1	96.1	1
MeTro3Lmin.B	GLU	235	75.9	36.61	-1.09	4.65				56.6	56.6	-1
MeTro3Lmin.B	LEU	236	27.4	12.07	-0.05		27.2			36.9	9.7
MeTro3Lmin.B	TRP	237	168.8	54.28	-0.01		85.8			122.5	36.7
MeTro3Lmin.B	GLN	238	85.6	42.84	-0.01		1			64.7	63.7
MeTro3Lmin.B	THR	239	16.6	9.5	-0.03		7.6			33.1	25.6
MeTro3Lmin.B	ILE	240	115.3	51.88	-0.06		58.2			80.4	22.2
MeTro3Lmin.B	TYR	241	129.6	49.03	0	10	48.2			86	37.8
MeTro3Lmin.B	ASN	242	64.5	37.36	0.03					44.2	44.2
MeTro3Lmin.B	LEU	243	81.7	36.01	-0.05		34.2			66.9	32.7
MeTro3Lmin.B	GLU	244	77	37.13	-1.08	4.99	0.3			58.9	58.6	-1
MeTro3Lmin.B	ALA	245	36.6	26.69	0.02		11.1			39.9	28.7
MeTro3Lmin.B	GLU	246	73.5	35.45	-1.09	3.74				60.1	60.1	-1
MeTro3Lmin.B	LYS	247	140.4	59.64	0.33	6.37	15.4			101.3	85.9	1
MeTro3Lmin.B	PHE	248	132	50.38	-0.13		65.6			83.2	17.6
MeTro3Lmin.B	ASP	249	35.5	20.12	-1.11	4.43				38.5	38.5	-1
MeTro3Lmin.B	LEU	250	122.9	54.18	-0.05		59.9			87.5	27.6
MeTro3Lmin.B	GLN	251	96.6	48.33	-0.01					67.8	67.8
MeTro3Lmin.B	GLU	252	104.4	50.34	-1.09	4.19				70.5	70.5	-1
MeTro3Lmin.B	LYS	253	120.3	51.1	0.4	6.65	7.3			90.5	83.2	1
MeTro3Lmin.B	PHE	254	123.3	47.05	-0.13		56.1			72.5	16.4
MeTro3Lmin.B	LYS	255	125.8	53.44	0.45	6.79	24.7			91.5	66.8	1
MeTro3Lmin.B	GLN	256	66.6	33.31	-0.13					56.7	56.7
MeTro3Lmin.B	GLN	257	55.6	27.84	-0.01		0.2			41.1	40.9
MeTro3Lmin.B	LYS	258	74.8	31.75	1	9.73	19.2			71	51.8	1
MeTro3Lmin.B	TYR	259	160.4	60.69	0	10	52.6			104.4	51.8
MeTro3Lmin.B	GLU	260	66.9	32.24	-1.09	2.88	0.1			48.4	48.3	-1
MeTro3Lmin.B	ILE	261	69.9	31.44	-0.06		34.3	0.5		60.7	25.9
MeTro3Lmin.B	ASN	262	76.9	44.53	0.03					54.2	54.2
MeTro3Lmin.B	VAL	263	63.2	32.32	-0.08		32.8	0.2		55.7	22.8
MeTro3Lmin.B	LEU	264	87.8	38.69	-0.05		42.7	0.2		69.8	26.9
MeTro3Lmin.B	ARG	265	169.1	62.62	1	12.43	1	45.6		109.5	62.9	1
MeTro3Lmin.B	ASN	266	68.3	39.57	0.03					58.5	58.5
MeTro3Lmin.B	ARG	267	146.5	54.25	1	12.43		45.3		101.1	55.7	1
MeTro3Lmin.B	ILE	268	105.2	47.31	-0.06		44.2			77.2	33
MeTro3Lmin.B	ASN	269	101.5	58.81	0.03					67.5	67.5
MeTro3Lmin.B	ASP	270	103	58.29	-1.11	3.48				66.5	66.5	-1
MeTro3Lmin.B	ASN	271	134.9	78.14	0.03					79.3	79.3
MeTro3Lmin.B	GLN	272	195.1	97.6	-0.04					113	113
