# Supplementary material for: Methacrylate Coatings for Titanium Surfaces to Optimize Biocompatibility
Source: Micromachines (Basel). 2020 Jan 13;11(1):87. doi: 10.3390/mi11010087 (PMC7019220; doi:10.3390/mi11010087)
Supplement: Supplementary file 1 [file micromachines-11-00087-s001.zip › S11.csv]

Chain	Res	UID	res_ASA	res_exp	res_charge	propKa	res_hyd	res_pos	res_neg	res_tot	res_oth	ens_res_charge	ens_sc_pKa	ens_bb_pKa
modchains4	LYS	1	206.2	87.57	2.03	8.76		43.6		119.4	75.8	2
modchains4	GLU	2	118.2	56.98	-1.07	2.33				68.6	68.6	-1
modchains4	GLY	3	41.8	41.72	0.04					32.9	32.9
modchains4	PRO	4	154.6	90.03	-0.17					80.7	80.7
modchains4	PRO	5	111.6	65.02	-0.17		18.5			70.5	51.9
modchains4	GLY	6	7	6.97	0.04			2.6		13.3	10.7
modchains4	LEU	7	85	37.45	-0.04		39.3			77	37.7
modchains4	ARG	8	165	61.1	1.02	11.45				117.2	117.2	1
modchains4	GLY	9	79.4	79.2	0.04					47.6	47.6
modchains4	ASP	10	103.4	58.56	-1.1	2.25				69.1	69.1	-1
modchains4	PRO	11	121	70.46	-0.17		20.5			76.5	56
modchains4	GLY	12	61.7	61.48	0.04					44.4	44.4
modchains4	SER	13	66.4	45.51	-0.02					53.6	53.6
modchains4	HIS	13A	142.1	64.6	0.12	6.5				100.1	100.1
modchains4	GLY	13B	48.1	47.93	0.04					37.3	37.3
modchains4	ARG	13C	142.1	52.62	1.02	12.15				107.2	107.2	1
modchains4	VAL	13D	125.8	64.4	-0.07					76.6	76.6
modchains4	GLY	13E	57.9	57.71	0.04					34	34
modchains4	ASP	13F	101.6	57.52	-1.1					62.1	62.1	-1
modchains4	ARG	13G	158.2	58.57	1.02	11.38				114.9	114.9	1
modchains4	GLY	14	59.9	59.71	0.04					45.8	45.8
modchains4	PRO	15	169.7	98.82	-0.17					88.7	88.7
modchains4	ALA	16	108.6	79.1	0.03					71.2	71.2
modchains4	GLY	17	72.4	72.19	0.04					48.7	48.7
modchains4	PRO	18	141	82.11	-0.17					85.9	85.9
modchains4	PRO	19	156.5	91.11	-0.17					86.9	86.9
modchains4	GLY	20	88	87.68	0.04					55.8	55.8
modchains4	GLY	21	68.6	68.42	0.04					52.4	52.4
modchains4	PRO	22	130	75.7	-0.17					85.5	85.5
modchains4	GLY	23	104.5	104.22	0.04					55.6	55.6
modchains4	ASP	24	112.8	63.85	-1.1	3.72				73.7	73.7	-1
modchains4	LYS	25	275.1	116.82	2.56	6.65		88.9		177.4	88.4	3
modchains4	GLY	26	57.1	56.92	0.86			2.1		29.9	27.9	1
modchains4	ASP	27	87.6	49.6	-1.09	4.3		2.8		76.9	74.1	-1
modchains4	PRO	28	159.7	93.02	-0.17					87.8	87.8
modchains4	GLY	29	75.3	75.04	0.04					52.2	52.2
modchains4	GLU	30	169.4	81.65	-1.07	3.06			35.8	102.4	66.6	-1
modchains4	ASP	31	135.7	76.8	-1.1	2.97			42.8	76.4	33.6	-1
modchains4	GLY	32	72	71.8	0.04				0.9	45.3	44.4
modchains4	GLN	33	136.6	68.36	0				29.4	105.7	76.4
modchains4	PRO	34	145.1	84.51	-0.17					85.8	85.8
modchains4	GLY	35	37.5	37.39	0.04					40.9	40.9
modchains4	PRO	36	184.2	107.26	-0.17					94.2	94.2
modchains4	ASP	37	85.8	48.56	-1.1	3.58			22	67.9	45.9	-1
modchains4	GLY	38	60.8	60.64	0.04				0.1	43.8	43.7
modchains4	PRO	39	108.6	63.23	-0.17				4	69.4	65.4
modchains4	PRO	40	168.1	97.87	-0.17				9.3	91	81.6
modchains4	GLY	41	31.4	31.33	0.04					39	39
modchains4	PRO	42	137.5	80.07	-0.17					82.2	82.2
modchains4	ALA	43	111.5	81.19	0.03					63.6	63.6
modchains4	GLY	44	98.7	98.39	0.04					55.4	55.4
modchains4	THR	45	114.1	65.43	-0.02					78.2	78.2
modchains4	THR	46	153	87.74	0.04					95.6	95.6
modchains4	GLY	47	62	61.78	0.04					48.3	48.3
modchains4	GLN	48	188.4	94.28	0					108	108
modchains4	ARG	49	191.7	70.99	1.02	12.15				124.7	124.7	1
modchains4	GLY	50	65.4	65.18	0.04					40.5	40.5
modchains4	ILE	51	174.8	78.63	-0.05		55.1			101.6	46.4
modchains4	VAL	52	136	69.61	-0.07					83	83
modchains4	GLY	53	47.8	47.64	0.04					45.1	45.1
modchains4	MET	54	192.7	78.78	-0.02		51.3			119.5	68.2
modchains4	PRO	55	104.5	60.87	-0.17					64.3	64.3
modchains4	GLY	56	81.4	81.11	0.04					54	54
modchains4	GLN	57	142.2	71.16	0					94.6	94.6
modchains4	ARG	58	182.8	67.7	1.02	11.87				131.5	131.5	1
modchains4	GLY	59	74	73.74	0.04					45.2	45.2
modchains4	GLU	60	123.4	59.51	-1.07	1.64				83.1	83.1	-1
modchains4	ARG	61	195	72.2	1.02	12.15				129.3	129.3	1
modchains4	GLY	62	54.2	54.07	0.04					36.2	36.2
modchains4	MET	63	164.8	67.38	-0.02					107.1	107.1
modchains4	PRO	64	129.4	75.38	-0.17					78.8	78.8
modchains4	GLY	65	76.3	76.06	0.04					48.9	48.9
modchains4	LEU	66	199.3	87.84	-0.04		63.3			116.3	53
modchains4	PRO	67	130.2	75.85	-0.17					83.3	83.3
modchains4	GLY	68	63	62.84	0.04					46.8	46.8
modchains4	PRO	69	166.9	97.18	-0.17					90.2	90.2
modchains4	ALA	70	124.3	90.57	0.03					72.6	72.6
modchains4	GLY	71	82.4	82.13	0.04					49.1	49.1
modchains4	THR	72	142	81.4	-0.02					89	89
modchains4	PRO	73	142.4	82.95	-0.17					76.6	76.6
modchains4	GLY	74	64.6	64.41	0.04					45.8	45.8
modchains4	LYS	75	146.4	62.16	1.01	10.08				108.2	108.2	1
modchains4	VAL	76	168.5	86.22	-0.07					96.7	96.7
modchains4	GLY	77	34.5	34.39	0.04					34.5	34.5
modchains4	PRO	78	155.6	90.62	-0.17					86.9	86.9
modchains4	THR	79	144.4	82.81	-0.02					90.6	90.6
modchains4	GLY	80	81.1	80.85	0.04					51.9	51.9
modchains4	ALA	81	112	81.56	0.03					69.6	69.6
modchains4	PRO	82	164.5	95.8	-0.17					91.5	91.5
modchains4	GLY	83	86.5	86.21	0.04					48.6	48.6
modchains4	ASP	84	107	60.57	-1.1	3.6				82.4	82.4	-1
modchains4	LYS	85	175.4	74.49	1.8	6.79		67.4		141.3	73.9	2
modchains4	GLY	86	60.6	60.38	-1.34					33.7	33.7	1
modchains4	PRO	87	143.3	83.42	-0.17					79.8	79.8
modchains4	PRO	88	146	85.05	-0.17					84.2	84.2
modchains4	GLY	89	22.1	22.04	0.04					26.7	26.7
modchains4	PRO	90	146.5	85.3	-0.17					87.4	87.4
modchains4	VAL	91	151.9	77.74	-0.07					98.5	98.5
modchains4	GLY	92	62.7	62.52	0.04					41	41
modchains4	PRO	93	141.5	82.39	-0.17					86.4	86.4
modchains4	PRO	94	157.6	91.81	-0.17					89.1	89.1
modchains4	GLY	95	83.1	82.86	0.04					52	52
modchains4	SER	96	133.1	91.27	-0.02					78.4	78.4
modchains4	ASN	97	146.3	84.73	0.04					96.5	96.5
modchains4	GLY	98	44.8	44.68	0.04					41.7	41.7
modchains4	PRO	99	180.9	105.35	-0.17				10.9	93	82.1
modchains4	VAL	100	112.9	57.79	-0.07				2.8	88.5	85.7
modchains4	GLY	101	68.9	68.72	0.04				1.9	48.6	46.6
modchains4	GLU	102	135.8	65.46	-1.07	3.24			24.6	84.5	59.9	-1
modchains4	PRO	103	156.6	91.18	-0.17					86	86
modchains4	GLY	104	43.1	42.96	0.04					44.4	44.4
modchains4	PRO	105	166.7	97.07	-0.17					91	91
modchains4	GLU	106	158.9	76.61	-1.07	3.87				103	103	-1
modchains4	GLY	107	69.7	69.53	0.04					45.3	45.3
modchains4	PRO	108	149.3	86.95	-0.17					81.9	81.9
modchains4	ALA	109	122.6	89.28	0.03					74.2	74.2
modchains4	GLY	110	74.2	73.95	0.04					49.8	49.8
modchains4	ASN	111	144.7	83.79	0.04					89.6	89.6
modchains4	ASP	112	112.9	63.9	-1.1	2.56				75.7	75.7	-1
modchains4	GLY	113	74	73.8	0.04					43.6	43.6
modchains4	THR	114	68.5	39.29	-0.02					53.4	53.4
modchains4	PRO	115	98.5	57.38	-0.17					66.5	66.5
modchains4	GLY	116	85.6	85.35	0.04					45.9	45.9
modchains4	ARG	117	180.5	66.85	1.02	11.87				125	125	1
modchains4	ASP	118	137.5	77.83	-1.1	2.17			23.8	86.2	62.4	-1
modchains4	GLY	119	73.3	73.04	0.04				0.6	48.5	48
modchains4	ALA	120	100.5	73.24	0.03				16.1	61.4	45.3
modchains4	VAL	121	173.8	88.95	-0.07					99.1	99.1
modchains4	GLY	122	75.9	75.62	0.04					52.2	52.2
modchains4	GLU	123	148.5	71.58	-1.07	1.59				95.6	95.6	-1
modchains4	ARG	124	195.8	72.5	1.02	12.29				126.8	126.8	1
modchains4	GLY	125	41.4	41.3	0.04					28.1	28.1
modchains4	ASP	126	106.8	60.45	-1.1	2.21				67.8	67.8	-1
modchains4	ARG	127	182.7	67.66	1.02	11.66				129.4	129.4	1
modchains4	GLY	128	79	78.75	0.04					53.7	53.7
modchains4	ASP	129	113.4	64.2	-1.1	3.08				74.2	74.2	-1
modchains4	PRO	130	156.5	91.15	-0.17					89.2	89.2
modchains4	GLY	131	58.7	58.56	0.04					36.8	36.8
modchains4	PRO	132	128.8	75.03	-0.17					79.4	79.4
modchains4	ALA	133	114.8	83.66	0.03					70.6	70.6
modchains4	GLY	134	79.6	79.37	0.04					54.3	54.3
modchains4	LEU	135	190.4	83.93	-0.04		57			112.8	55.8
modchains4	PRO	136	113.4	66.05	-0.17		0.5			72	71.5
modchains4	GLY	137	102.1	101.75	0.04					50.9	50.9
modchains4	SER	138	75.3	51.66	-0.02					63.5	63.5
modchains4	ARG	139	221.1	81.87	1.02	12.08				131.1	131.1	1
modchains4	GLY	140	72	71.77	0.04					40	40
modchains4	ALA	141	94.8	69.04	0.03					68.3	68.3
modchains4	PRO	142	165.1	96.14	-0.17					89.6	89.6
modchains4	GLY	143	76.7	76.45	0.04					50.4	50.4
modchains4	THR	144	146.3	83.85	-0.02					91.8	91.8
modchains4	PRO	145	143.5	83.59	-0.17					84.6	84.6
modchains4	GLY	146	55	54.82	0.04					45.4	45.4
modchains4	PRO	147	164	95.51	-0.17					90.8	90.8
modchains4	VAL	148	176.6	90.39	-0.07					101.8	101.8
modchains4	GLY	149	74.1	73.84	0.04					49.1	49.1
modchains4	ALA	150	108.2	78.79	0.03					69.5	69.5
modchains4	PRO	151	160.4	93.41	-0.17					89.9	89.9
modchains4	GLY	152	81	80.79	0.04					52.1	52.1
modchains4	ASP	153	98.7	55.85	-1.1	1.25				75.3	75.3	-1
modchains4	ALA	154	140.2	102.15	0.03					71.5	71.5
modchains4	GLY	155	58	57.79	0.04					44.5	44.5
modchains4	GLN	156	164.6	82.36	0					103.4	103.4
modchains4	ARG	157	195	72.22	1.02	12.08				125.6	125.6	1
modchains4	GLY	158	57.8	57.63	0.04					42.2	42.2
modchains4	ASP	159	99.5	56.3	-1.1	1.56				64.2	64.2	-1
modchains4	PRO	160	116.5	67.86	-0.17					72.3	72.3
modchains4	GLY	161	62.3	62.12	0.04					40.8	40.8
modchains4	SER	162	87.3	59.87	-0.02					64	64
modchains4	ARG	163	176.4	65.31	1.02	12.22	1.7			127.1	125.4	1
modchains4	GLY	164	52.9	52.77	0.04					40.9	40.9
modchains4	PRO	165	174.2	101.44	-0.17					91	91
modchains4	ILE	166	133.8	60.2	-0.05		48.4			91.8	43.4
modchains4	GLY	167	41.7	41.61	0.04					36.4	36.4
modchains4	PRO	168	101.2	58.92	-0.17					74.2	74.2
modchains4	PRO	169	142.8	83.18	-0.17					77.8	77.8
modchains4	GLY	170	74.7	74.5	0.04					47.4	47.4
modchains4	ARG	171	195.9	72.52	1.02	11.94				130.7	130.7	1
modchains4	ALA	172	97.4	70.97	0.03					63.5	63.5
modchains4	GLY	173	76.6	76.35	0.04					49.1	49.1
modchains4	LYS	174	225.6	95.82	1.01	10.5		51.1		133.1	82	1
modchains4	ARG	175	180.5	66.82	1.02	12.01				127.2	127.2	1
modchains4	GLY	176	53.1	52.97	0.04					37.3	37.3
modchains4	LEU	177	155.3	68.45	-0.04		51.3			95.8	44.5
modchains4	LEU	178	132.6	58.44	-0.04					93.5	93.5
modchains4	GLY	179	21.1	21	0.04					28	28
modchains4	PRO	180	162.5	94.64	-0.17					88.3	88.3
modchains4	GLN	181	129.4	64.75	0					93.4	93.4
modchains4	GLY	182	39.3	39.13	0.04					37.8	37.8
modchains4	PRO	183	179.3	104.44	-0.17					90.4	90.4
modchains4	ARG	184	175.7	65.08	1.02	11.73		15.4		129.6	114.2	1
modchains4	GLY	185	66.9	66.65	0.04					43.2	43.2
modchains4	ASP	186	96.5	54.65	-1.1	1.43		0.9		68.6	67.8	-1
modchains4	LYS	187	242.4	102.93	2.56	6.65		77.2		158.8	81.7	3
modchains4	GLY	188	84.5	84.27	0.86					41.6	41.6	1
modchains4	ASP	189	106.2	60.1	-1.09	4.27				71.8	71.8	-1
modchains4	HIS	190	157.3	71.53	0.11	6.42				112.4	112.4
modchains4	GLY	191	59.1	58.96	0.04					42	42
modchains4	ASP	192	42.1	23.81	-1.1	2.19				35.1	35.1	-1
modchains4	ARG	193	155.6	57.63	1.02	11.66		12.1		103.6	91.5	1
modchains4	GLY	194	67.3	67.06	0.04					40.2	40.2
modchains4	ASP	195	63.4	35.89	-1.1	2.73				45.5	45.5	-1
modchains4	ARG	196	141.1	52.25	1.02	11.73		12.7		101.7	88.9	1
modchains4	GLY	197	31.9	31.76	0.04					26.7	26.7
modchains4	GLN	198	81.2	40.64	0			5.4		61.4	56.1
modchains4	LYS	199	227.7	96.68	2.54	6.58		84.6		153.4	68.7	3
modchains4	GLY	200	96.1	95.8	0.86			17.5		46.7	29.2	1
modchains4	HIS	201	155	70.48	0.06	6.15		0.9		96	95.2
modchains4	ARG	202	182.1	67.43	1.02	11.94				117.9	117.9	1
modchains4	GLY	203	61.4	61.22	-0.96	2				38.4	38.4	-1
modchains4	LYS	1	216.8	92.09	3.72	7.11		77.7		144.9	67.2	3
modchains4	GLU	2	152.8	73.67	-0.23	3.65	7.4			78.4	70.9	-1
modchains4	GLY	3	21.1	21.07	0.04			2.9		23.8	20.9
modchains4	PRO	4	110.7	64.47	-0.17			14.8		69.4	54.6
modchains4	PRO	5	122.4	71.28	-0.17			2.9		78.4	75.4
modchains4	GLY	6	3.6	3.57	0.04					9.1	9.1
modchains4	LEU	7	104.1	45.87	-0.04		45.1			67.9	22.7
modchains4	ARG	8	130.9	48.47	1.02	11.38				93.2	93.2	1
modchains4	GLY	9	26.8	26.69	0.04					24.4	24.4
modchains4	ASP	10	74.2	42.01	-1.1					49.1	49.1	-1
modchains4	PRO	11	1.3	0.74	-0.17					9.7	9.7
modchains4	GLY	12	25.9	25.78	0.04					19.8	19.8
modchains4	SER	13	103.6	71.07	-0.02					61	61
modchains4	HIS	13A	134.9	61.35	0.26	6.92				87.1	87.1
modchains4	GLY	13B	36.8	36.65	0.04					29.4	29.4
modchains4	ARG	13C	160.5	59.44	1.02	11.66				117.6	117.6	1
modchains4	VAL	13D	134.2	68.68	-0.07					92	92
modchains4	GLY	13E	79.2	78.92	0.04					46.8	46.8
modchains4	ASP	13F	101.9	57.67	-1.1	2.34				69.8	69.8	-1
modchains4	ARG	13G	238.7	88.37	1.02	12.29				142.8	142.8	1
modchains4	GLY	14	63.9	63.72	0.04					52	52
modchains4	PRO	15	160	93.17	-0.17					90.2	90.2
modchains4	ALA	16	111.9	81.54	0.03					68.8	68.8
modchains4	GLY	17	73.6	73.36	0.04					49	49
modchains4	PRO	18	87.8	51.13	-0.17					66.2	66.2
modchains4	PRO	19	152	88.52	-0.17					85.2	85.2
modchains4	GLY	20	57.8	57.64	0.04					43	43
modchains4	GLY	21	20.7	20.63	0.04					23.6	23.6
modchains4	PRO	22	113.3	65.95	-0.17				0.4	65.1	64.7
modchains4	GLY	23	83.8	83.57	0.04					49.1	49.1
modchains4	ASP	24	109.4	61.93	-1.1	3.03				68.1	68.1	-1
modchains4	LYS	25	71.5	30.36	0.99	9.1				63.5	63.5	1
modchains4	GLY	26	57.1	56.91	0.04				10	42.1	32.1
modchains4	ASP	27	93.5	52.95	-1.1	2.84			15.6	65.4	49.8	-1
modchains4	PRO	28	123.2	71.75	-0.17				13.9	80.8	66.9
modchains4	GLY	29	65.4	65.19	0.04				5.9	42.5	36.7
modchains4	GLU	30	166.1	80.06	-1.07	3.73			43.6	102.3	58.7	-1
modchains4	ASP	31	111	62.82	-1.1	2.87			37.3	72.4	35.1	-1
modchains4	GLY	32	69.3	69.1	0.04				8.9	44	35.1
modchains4	GLN	33	152.8	76.46	0				1.6	98.6	97
modchains4	PRO	34	139.4	81.18	-0.17					87.2	87.2
modchains4	GLY	35	56.7	56.56	0.04					44.9	44.9
modchains4	PRO	36	165.9	96.64	-0.17					90.7	90.7
modchains4	ASP	37	138.9	78.61	-1.1	3.09			33.7	91.5	57.8	-1
modchains4	GLY	38	72.2	72.02	0.04				0.5	47.2	46.7
modchains4	PRO	39	126	73.38	-0.17				1.1	80.6	79.5
modchains4	PRO	40	152.6	88.87	-0.17					90.5	90.5
modchains4	GLY	41	59.5	59.27	0.04					50.7	50.7
modchains4	PRO	42	135.4	78.87	-0.17					75.1	75.1
modchains4	ALA	43	113.4	82.63	0.03					60.9	60.9
modchains4	GLY	44	85.6	85.37	0.04					49.7	49.7
modchains4	THR	45	84.9	48.68	0.04					68.9	68.9
modchains4	THR	46	128.1	73.43	0.04					82.8	82.8
modchains4	GLY	47	55.4	55.28	0.04					47.1	47.1
modchains4	GLN	48	195.1	97.63	0					111.7	111.7
modchains4	ARG	49	216.2	80.06	1.02	12.01				136.3	136.3	1
modchains4	GLY	50	59.7	59.51	0.04					47.4	47.4
modchains4	ILE	51	211.9	95.35	0.04		57.7			121.7	64
modchains4	VAL	52	134.9	69.03	-0.07		35.7			87.9	52.2
modchains4	GLY	53	45	44.9	0.04					36.7	36.7
modchains4	MET	54	168.6	68.94	-0.02		69.7			102.6	33
modchains4	PRO	55	113.2	65.91	-0.17		20.3			74.1	53.8
modchains4	GLY	56	23.2	23.08	0.04					21.3	21.3
modchains4	GLN	57	145.2	72.64	0					81.2	81.2
modchains4	ARG	58	142.9	52.93	1.02	11.8				110.1	110.1	1
modchains4	GLY	59	67.1	66.87	0.04					43.3	43.3
modchains4	GLU	60	113.7	54.8	-1.07	2.95				81.9	81.9	-1
modchains4	ARG	61	232.9	86.22	1.02	12.36				147.9	147.9	1
modchains4	GLY	62	75.5	75.29	0.04					51.4	51.4
modchains4	MET	63	184.2	75.32	-0.02		55			121.6	66.6
modchains4	PRO	64	122.2	71.14	-0.17		20.7			75.7	55
modchains4	GLY	65	85.2	84.95	0.04					50.6	50.6
modchains4	LEU	66	154.1	67.93	-0.04		64.5			112.8	48.3
modchains4	PRO	67	138.5	80.64	-0.17		21.2			83.5	62.3
modchains4	GLY	68	46	45.84	0.04					42.7	42.7
modchains4	PRO	69	164.9	96.02	-0.17					91.7	91.7
modchains4	ALA	70	76.6	55.79	0.03					54.4	54.4
modchains4	GLY	71	83.6	83.31	0.04					45.7	45.7
modchains4	THR	72	116.2	66.61	-0.02					84	84
modchains4	PRO	73	99.4	57.92	-0.17		19.7			70.6	50.9
modchains4	GLY	74	27.1	26.98	0.04				4.7	24.9	20.2
modchains4	LYS	75	206.2	87.55	0.57	6.93			3	123.8	120.8	1
modchains4	VAL	76	91.2	46.65	-0.14		35.5			60.4	25
modchains4	GLY	77	23	22.97	0.04					31.9	31.9
modchains4	PRO	78	116	67.55	-0.17					81.5	81.5
modchains4	THR	79	127.5	73.11	-0.02					84.3	84.3
modchains4	GLY	80	78.2	77.95	0.04					42.9	42.9
modchains4	ALA	81	102.3	74.5	0.03					69.7	69.7
modchains4	PRO	82	147.6	85.93	-0.17					85.4	85.4
modchains4	GLY	83	67	66.75	0.04					47.3	47.3
modchains4	ASP	84	136.2	77.12	-1.1	3.46				88.8	88.8	-1
modchains4	LYS	85	214.2	90.97	2.54	6.58		90.5		160.4	69.9	3
modchains4	GLY	86	45	44.82	0.86			13.9		28.2	14.2	1
modchains4	PRO	87	128.7	74.95	-0.17					73.7	73.7
modchains4	PRO	88	124.9	72.74	-0.17			2		78.3	76.3
modchains4	GLY	89	43	42.85	0.04			12		40.8	28.8
modchains4	PRO	90	135.3	78.78	-0.17		21.6	18.7		88.1	47.8
modchains4	VAL	91	133.5	68.33	-0.07		35.9			90.4	54.5
modchains4	GLY	92	48.4	48.24	0.04					41.5	41.5
modchains4	PRO	93	156.6	91.2	-0.17					84.3	84.3
modchains4	PRO	94	128.6	74.91	-0.17					86	86
modchains4	GLY	95	76.3	76.03	0.04					46	46
modchains4	SER	96	121.7	83.44	-0.02					76.9	76.9
modchains4	ASN	97	136.6	79.1	0.04					87.4	87.4
modchains4	GLY	98	85	84.73	0.04					47.9	47.9
modchains4	PRO	99	123.5	71.94	-0.17		23.3			82.1	58.9
modchains4	VAL	100	155.5	79.57	-0.07		38.7			94.8	56.1
modchains4	GLY	101	47.8	47.67	0.04				3.6	41.6	38
modchains4	GLU	102	180.2	86.89	-1.07	4.66			48.4	103.9	55.5	-1
modchains4	PRO	103	151.9	88.45	-0.17					86.4	86.4
modchains4	GLY	104	61.5	61.28	0.04					51.4	51.4
modchains4	PRO	105	153.7	89.53	-0.17					87.9	87.9
modchains4	GLU	106	139.5	67.26	-1.07	3.54				82.2	82.2	-1
modchains4	GLY	107	50.5	50.32	0.04					41.2	41.2
modchains4	PRO	108	151.5	88.22	-0.17					84.6	84.6
modchains4	ALA	109	97	70.67	0.03				0.2	60.5	60.4
modchains4	GLY	110	53.4	53.25	0.04				11.5	44.7	33.2
modchains4	ASN	111	144.9	83.95	0.04				24.2	88.9	64.7
modchains4	ASP	112	126.6	71.67	-1.1	3.81			23.8	81.8	58	-1
modchains4	GLY	113	69.1	68.93	0.04					42.7	42.7
modchains4	THR	114	142.9	81.95	-0.02					91.8	91.8
modchains4	PRO	115	159.1	92.65	-0.17					89.7	89.7
modchains4	GLY	116	82.6	82.32	0.04					51.2	51.2
modchains4	ARG	117	183.3	67.87	1.02	11.8				128.6	128.6	1
modchains4	ASP	118	146.4	82.85	-1.1	2.06				74.1	74.1	-1
modchains4	GLY	119	55.3	55.16	0.04					38.4	38.4
modchains4	ALA	120	110.4	80.39	0.03					70	70
modchains4	VAL	121	121.8	62.32	-0.07					82.8	82.8
modchains4	GLY	122	33.2	33.05	0.04					28	28
modchains4	GLU	123	192.3	92.7	-1.07	4.08			35.2	106.4	71.2	-1
modchains4	ARG	124	147.6	54.67	1.02	11.87				112.1	112.1	1
modchains4	GLY	125	46.5	46.41	0.04					37.8	37.8
modchains4	ASP	126	95.7	54.19	-1.1	2.72				63.2	63.2	-1
modchains4	ARG	127	171.3	63.41	1.02	11.94				123.8	123.8	1
modchains4	GLY	128	79.3	79.06	0.04					46.2	46.2
modchains4	ASP	129	108.5	61.44	-1.1	2.73				71.1	71.1	-1
modchains4	PRO	130	150.7	87.74	-0.17					85.9	85.9
modchains4	GLY	131	67.3	67.05	0.04					52.5	52.5
modchains4	PRO	132	159.9	93.12	-0.17					88.4	88.4
modchains4	ALA	133	116.1	84.54	0.03					72.3	72.3
modchains4	GLY	134	73.3	73.07	0.04					49.6	49.6
modchains4	LEU	135	185.1	81.57	-0.04		62.9			117	54.1
modchains4	PRO	136	135.5	78.92	-0.17					83.3	83.3
modchains4	GLY	137	76.8	76.57	0.04					48.3	48.3
modchains4	SER	138	89.5	61.35	-0.02					64.3	64.3
modchains4	ARG	139	255.9	94.75	1.02	12.43		37.9		153.2	115.3	1
modchains4	GLY	140	81.3	81.05	0.04					52.1	52.1
modchains4	ALA	141	107.9	78.62	0.03					69.3	69.3
modchains4	PRO	142	162.8	94.8	-0.17					90.8	90.8
modchains4	GLY	143	78.8	78.52	0.04					48.9	48.9
modchains4	THR	144	135.3	77.59	-0.02					92	92
modchains4	PRO	145	146.7	85.41	-0.17					79.8	79.8
modchains4	GLY	146	72.9	72.72	0.04					49	49
modchains4	PRO	147	140.6	81.87	-0.17		21			85	64
modchains4	VAL	148	166.6	85.26	-0.07		38			101.8	63.7
modchains4	GLY	149	69.8	69.63	0.04					45.4	45.4
modchains4	ALA	150	107.4	78.21	0.03					70.2	70.2
modchains4	PRO	151	138.8	80.8	-0.17					82.7	82.7
modchains4	GLY	152	98.1	97.78	0.04					54.9	54.9
modchains4	ASP	153	76.3	43.18	-1.1	1.98				64.6	64.6	-1
modchains4	ALA	154	133.8	97.47	0.03					67.2	67.2
modchains4	GLY	155	28.6	28.53	0.04					36.4	36.4
modchains4	GLN	156	159.9	80.04	0					96.9	96.9
modchains4	ARG	157	198	73.32	1.02	12.01				128	128	1
modchains4	GLY	158	65.5	65.26	0.04					39.5	39.5
modchains4	ASP	159	109.9	62.22	-1.1	2.62				76.2	76.2	-1
modchains4	PRO	160	163.5	95.19	-0.17					86	86
modchains4	GLY	161	76.5	76.24	0.04					50.2	50.2
modchains4	SER	162	123.7	84.82	-0.02					78.1	78.1
modchains4	ARG	163	197.6	73.17	1.02	12.15				130.8	130.8	1
modchains4	GLY	164	57.8	57.66	0.04					39.1	39.1
modchains4	PRO	165	130.8	76.2	-0.17		25.1			72.7	47.6
modchains4	ILE	166	144.4	64.95	-0.05		50.5			98.6	48.1
modchains4	GLY	167	47.3	47.18	0.04					36.4	36.4
modchains4	PRO	168	112.9	65.75	-0.17		22.8			70	47.3
modchains4	PRO	169	116.8	68.01	-0.17					69.9	69.9
modchains4	GLY	170	42.2	42.09	0.04					35.4	35.4
modchains4	ARG	171	189.8	70.28	1.02	11.87				123.9	123.9	1
modchains4	ALA	172	108.8	79.22	0.03					65.9	65.9
modchains4	GLY	173	68.9	68.65	0.04					47.1	47.1
modchains4	LYS	174	173.7	73.79	1.01	10.08				125.8	125.8	1
modchains4	ARG	175	250.7	92.82	1.02	12.5		52.6		144	91.5	1
modchains4	GLY	176	56.4	56.22	0.04			4.6		40.9	36.3
modchains4	LEU	177	188.7	83.16	-0.04		60.4			116.8	56.5
modchains4	LEU	178	200.7	88.47	-0.04		65.2			113.8	48.6
modchains4	GLY	179	47.3	47.15	0.04					48	48
modchains4	PRO	180	173.6	101.07	-0.17					89.5	89.5
modchains4	GLN	181	193.5	96.85	0					114.9	114.9
modchains4	GLY	182	50.3	50.13	0.04					47.7	47.7
modchains4	PRO	183	168	97.86	-0.17					91.1	91.1
modchains4	ARG	184	195.2	72.29	1.02	12.08				123	123	1
modchains4	GLY	185	44.4	44.31	0.04					38.2	38.2
modchains4	ASP	186	121.2	68.64	-1.1	2.87			0.4	75.5	75.1	-1
modchains4	LYS	187	154.1	65.43	1.01	10.22				114.1	114.1	1
modchains4	GLY	188	44.8	44.66	0.04				6.7	36.4	29.7
modchains4	ASP	189	173.4	98.17	-1.1	3.94			55.9	91.2	35.3	-1
modchains4	HIS	190	134.7	61.28	0.34	7.09			3.2	97.2	94
modchains4	GLY	191	50.6	50.47	0.04					34.9	34.9
modchains4	ASP	192	78.7	44.55	-1.1	2.04				57.5	57.5	-1
modchains4	ARG	193	222.9	82.53	1.02	12.29				137.1	137.1	1
modchains4	GLY	194	58.5	58.33	0.04					47.4	47.4
modchains4	ASP	195	51	28.87	-1.1	3.35				45.5	45.5	-1
modchains4	ARG	196	193.1	71.49	1.02	12.15				123.1	123.1	1
modchains4	GLY	197	15.5	15.45	0.04					19.4	19.4
modchains4	GLN	198	73.5	36.8	0			0.2		57.8	57.6
modchains4	LYS	199	329.9	140.09	2.63	6.86		141.4		193.9	52.5	3
modchains4	GLY	200	48.8	48.67	0.86			17.7		33.1	15.5	1
modchains4	HIS	201	104.3	47.45	0.5	7.39		0.3		68.4	68.1
modchains4	ARG	202	167.5	62.01	1.02	12.08		25.3		109.3	84	1
modchains4	GLY	203	100.6	100.34	-0.96	3.36				55.5	55.5	-1
modchains4	LYS	1	85.6	36.36	-1.12	6.94	18.8		12.7	84.9	53.4
modchains4	GLU	2	91.4	44.06	-2.32	5.06			34.2	55.5	21.3	-2
modchains4	GLY	3	21.3	21.21	0.04				1.7	24.8	23.1
modchains4	PRO	4	104.2	60.68	-0.17					62.9	62.9
modchains4	PRO	5	78.5	45.72	-0.17				0.1	61.1	60.9
modchains4	GLY	6	77.8	77.58	0.04					45.1	45.1
modchains4	LEU	7	173.9	76.62	-0.04		53.9			105.6	51.7
modchains4	ARG	8	87.1	32.24	1.02	11.52				75.7	75.7	1
modchains4	GLY	9	40.1	39.99	0.04					38.7	38.7
modchains4	ASP	10	54.7	30.99	-1.1	2.1				46	46	-1
modchains4	PRO	11	85.1	49.56	-0.17					55	55
modchains4	GLY	12	64.9	64.73	0.04					36.8	36.8
modchains4	SER	13	108.9	74.7	-0.02					65.5	65.5
modchains4	HIS	13A	127.2	57.86	0.42	7.24				94.9	94.9
modchains4	GLY	13B	72.9	72.64	0.04					48.8	48.8
modchains4	ARG	13C	162.4	60.13	1.02	11.8				118.4	118.4	1
modchains4	VAL	13D	155.2	79.44	-0.07					94.6	94.6
modchains4	GLY	13E	64.1	63.86	0.04					44.7	44.7
modchains4	ASP	13F	62.4	35.33	-1.1	3				49.5	49.5	-1
modchains4	ARG	13G	217.1	80.37	1.02	12.29				143.3	143.3	1
modchains4	GLY	14	52.8	52.66	0.04					49.1	49.1
modchains4	PRO	15	166.1	96.73	-0.17					90.6	90.6
modchains4	ALA	16	113.6	82.74	0.03					70.6	70.6
modchains4	GLY	17	61.4	61.24	0.04					46.7	46.7
modchains4	PRO	18	154.6	90.05	-0.17					88.6	88.6
modchains4	PRO	19	166.9	97.18	-0.17					88.8	88.8
modchains4	GLY	20	69.3	69.08	0.04					51.6	51.6
modchains4	GLY	21	50.6	50.49	0.04					38.3	38.3
modchains4	PRO	22	151	87.93	-0.17					83	83
modchains4	GLY	23	73.5	73.31	0.04					44.8	44.8
modchains4	ASP	24	108.8	61.6	-1.1	2.96				70	70	-1
modchains4	LYS	25	194.1	82.43	0.57	6.65				144.5	144.5	1
modchains4	GLY	26	39.9	39.76	-0.14				6.5	27.5	21
modchains4	ASP	27	120	67.92	-1.1	2.97			16.6	71.5	55	-1
modchains4	PRO	28	118	68.72	-0.17				13.1	85	71.9
modchains4	GLY	29	87.6	87.38	0.04				12.4	50.5	38.1
modchains4	GLU	30	164.3	79.23	-1.07	3.16			14.3	97.2	82.9	-1
modchains4	ASP	31	113.4	64.22	-1.1	3			11.2	78.4	67.3	-1
modchains4	GLY	32	74.1	73.83	0.04				0.2	44.5	44.3
modchains4	GLN	33	198	99.09	0					109.1	109.1
modchains4	PRO	34	132.7	77.27	-0.17					79.3	79.3
modchains4	GLY	35	67.8	67.61	0.04					51.7	51.7
modchains4	PRO	36	150.1	87.41	-0.17					91.9	91.9
modchains4	ASP	37	149.3	84.5	-1.1	2.82				83.1	83.1	-1
modchains4	GLY	38	49.2	49.04	0.04					37.8	37.8
modchains4	PRO	39	116.2	67.67	-0.17					73.5	73.5
modchains4	PRO	40	117.7	68.53	-0.17					76.5	76.5
modchains4	GLY	41	44.4	44.29	0.04					38.8	38.8
modchains4	PRO	42	170.3	99.19	-0.17					89.9	89.9
modchains4	ALA	43	79.1	57.61	0.03					49.2	49.2
modchains4	GLY	44	25.5	25.38	0.04					42	42
modchains4	THR	45	134.4	77.05	-0.02					81.4	81.4
modchains4	THR	46	163.3	93.62	-0.02					87.4	87.4
modchains4	GLY	47	60.3	60.16	0.04					40.8	40.8
modchains4	GLN	48	140.5	70.28	0					97.1	97.1
modchains4	ARG	49	188.8	69.91	1.02	12.01				130.2	130.2	1
modchains4	GLY	50	64.4	64.19	0.04					46.4	46.4
modchains4	ILE	51	155.3	69.86	-0.05		57.6			99.6	42
modchains4	VAL	52	144	73.7	-0.07		37.2			86.7	49.6
modchains4	GLY	53	69.3	69.1	0.04					48	48
modchains4	MET	54	197.6	80.8	-0.02		62.8			123.2	60.4
modchains4	PRO	55	121	70.46	-0.17					78.3	78.3
modchains4	GLY	56	86.8	86.54	0.04					50.9	50.9
modchains4	GLN	57	158.2	79.14	0					103.3	103.3
modchains4	ARG	58	221.9	82.18	1.02	12.29				142.4	142.4	1
modchains4	GLY	59	64.2	64.01	0.04					41.1	41.1
modchains4	GLU	60	119.8	57.75	-1.07	1.43				78.8	78.8	-1
modchains4	ARG	61	222.6	82.44	1.02	12.08				132.3	132.3	1
modchains4	GLY	62	80.6	80.39	0.04					50.4	50.4
modchains4	MET	63	193.1	78.95	-0.02		48			115.8	67.8
modchains4	PRO	64	87.2	50.81	-0.17		24.6			65.9	41.3
modchains4	GLY	65	90.8	90.5	0.04					49.7	49.7
modchains4	LEU	66	170.5	75.13	-0.04		65			106.2	41.1
modchains4	PRO	67	128.3	74.73	-0.17					81.7	81.7
modchains4	GLY	68	59.4	59.17	0.04					51.1	51.1
modchains4	PRO	69	176.1	102.53	-0.17					90.9	90.9
modchains4	ALA	70	98.3	71.59	0.03					68.8	68.8
modchains4	GLY	71	89	88.69	0.04					50.3	50.3
modchains4	THR	72	99.4	57	-0.02					68.6	68.6
modchains4	PRO	73	156.4	91.05	-0.17					82.4	82.4
modchains4	GLY	74	86.4	86.16	0.04					44.7	44.7
modchains4	LYS	75	149.4	63.44	1.01	9.59	18.7			111.2	92.5	1
modchains4	VAL	76	166.3	85.1	-0.07		41.1			98.4	57.3
modchains4	GLY	77	47.4	47.26	0.04					44.6	44.6
modchains4	PRO	78	169.6	98.78	-0.17					88.4	88.4
modchains4	THR	79	154.1	88.36	-0.02					92.6	92.6
modchains4	GLY	80	78.3	78.11	0.04					49.4	49.4
modchains4	ALA	81	94.5	68.83	0.03					68.5	68.5
modchains4	PRO	82	116.5	67.82	-0.17					83.1	83.1
modchains4	GLY	83	90.8	90.49	0.04					49.5	49.5
modchains4	ASP	84	101.8	57.64	-1.1	2.19				60.4	60.4	-1
modchains4	LYS	85	205.3	87.19	0.61	6.79				143.3	143.3	1
modchains4	GLY	86	7.5	7.47	-0.14					14.5	14.5
modchains4	PRO	87	156.2	90.99	-0.17					86.7	86.7
modchains4	PRO	88	132.8	77.34	-0.17					84.7	84.7
modchains4	GLY	89	53.9	53.74	0.04					47.9	47.9
modchains4	PRO	90	173.7	101.13	-0.17					89.7	89.7
modchains4	VAL	91	158.1	80.89	-0.07					98.6	98.6
modchains4	GLY	92	56.9	56.73	0.04					44.7	44.7
modchains4	PRO	93	137.6	80.13	-0.17					81.6	81.6
modchains4	PRO	94	144.4	84.09	-0.17					84.7	84.7
modchains4	GLY	95	66	65.84	0.04					42.7	42.7
modchains4	SER	96	135.7	93.07	-0.02					82.9	82.9
modchains4	ASN	97	150.8	87.32	0.04					92.7	92.7
modchains4	GLY	98	65.8	65.59	0.04					46.9	46.9
modchains4	PRO	99	136.8	79.68	-0.17					83.7	83.7
modchains4	VAL	100	140	71.64	-0.07					94.2	94.2
modchains4	GLY	101	70.4	70.22	0.04					45.4	45.4
modchains4	GLU	102	159	76.67	-1.07	2.85				89.6	89.6	-1
modchains4	PRO	103	149.8	87.26	-0.17					87.5	87.5
modchains4	GLY	104	59.2	59.06	0.04					48.8	48.8
modchains4	PRO	105	166.6	97.05	-0.17				7.9	90.8	83
modchains4	GLU	106	158.2	76.25	-1.07	3.51			31.9	104.7	72.9	-1
modchains4	GLY	107	60.3	60.11	0.04					39.6	39.6
modchains4	PRO	108	141.1	82.17	-0.17				1.7	88.1	86.4
modchains4	ALA	109	97.9	71.35	0.03					63.5	63.5
modchains4	GLY	110	87.1	86.85	0.04					49.6	49.6
modchains4	ASN	111	151.7	87.88	0.04					97.9	97.9
modchains4	ASP	112	144.6	81.86	-1.1	2.81				82.1	82.1	-1
modchains4	GLY	113	74.7	74.43	0.04					51.4	51.4
modchains4	THR	114	153.6	88.03	0.04					87.4	87.4
modchains4	PRO	115	144.6	84.22	-0.17					87.8	87.8
modchains4	GLY	116	69.2	69	0.04					47.2	47.2
modchains4	ARG	117	200.2	74.12	1.02	11.8				130.7	130.7	1
modchains4	ASP	118	116.2	65.76	-1.1	2.01				64.2	64.2	-1
modchains4	GLY	119	52.7	52.58	0.04					41	41
modchains4	ALA	120	107.3	78.18	0.03					69.1	69.1
modchains4	VAL	121	129.5	66.26	-0.07					88.2	88.2
modchains4	GLY	122	70.1	69.86	0.04					47.3	47.3
modchains4	GLU	123	130.6	62.97	-1.07	3.4				80.9	80.9	-1
modchains4	ARG	124	178.9	66.23	1.02	11.87				120.5	120.5	1
modchains4	GLY	125	87.4	87.08	0.04					45.5	45.5
modchains4	ASP	126	59.7	33.79	-1.1	1.63				44	44	-1
modchains4	ARG	127	191	70.71	1.02	11.66				130.8	130.8	1
modchains4	GLY	128	70.5	70.29	0.04					51	51
modchains4	ASP	129	94.9	53.72	-1.1	2.67				67.3	67.3	-1
modchains4	PRO	130	164.7	95.89	-0.17					92.6	92.6
modchains4	GLY	131	47.4	47.22	0.04					46.1	46.1
modchains4	PRO	132	117.7	68.55	-0.17					72.7	72.7
modchains4	ALA	133	105.9	77.13	0.03					65.3	65.3
modchains4	GLY	134	68.8	68.55	0.04					45.6	45.6
modchains4	LEU	135	179.4	79.05	-0.04		64.3			112.2	47.9
modchains4	PRO	136	146.9	85.54	-0.17					88.3	88.3
modchains4	GLY	137	57.1	56.89	0.04					41.5	41.5
modchains4	SER	138	90.8	62.3	-0.02			3.1		66.9	63.8
modchains4	ARG	139	239.6	88.73	1.02	12.22		33		140.2	107.2	1
modchains4	GLY	140	74.5	74.26	0.04					48.3	48.3
modchains4	ALA	141	107.5	78.31	0.03					69.1	69.1
modchains4	PRO	142	154.1	89.75	-0.17					90	90
modchains4	GLY	143	72.7	72.49	0.04					48.4	48.4
modchains4	THR	144	142.9	81.91	-0.02					92.1	92.1
modchains4	PRO	145	147.1	85.68	-0.17					81.1	81.1
modchains4	GLY	146	51.3	51.09	0.04					43	43
modchains4	PRO	147	166.8	97.15	-0.17					88.6	88.6
modchains4	VAL	148	173.4	88.74	-0.07					104.4	104.4
modchains4	GLY	149	76.3	76.08	0.04					48.7	48.7
modchains4	ALA	150	106.5	77.59	0.03					68.6	68.6
modchains4	PRO	151	147.6	85.97	-0.17					87.6	87.6
modchains4	GLY	152	68.3	68.06	0.04					51	51
modchains4	ASP	153	170.8	96.7	-1.1	3.1			40.4	94.5	54.1	-1
modchains4	ALA	154	116.1	84.56	0.03					69.3	69.3
modchains4	GLY	155	49.5	49.37	0.04					45.6	45.6
modchains4	GLN	156	148.1	74.09	0					98.2	98.2
modchains4	ARG	157	203	75.17	1.02	11.8				119.1	119.1	1
modchains4	GLY	158	82.2	81.98	0.04					50.2	50.2
modchains4	ASP	159	55.2	31.25	-1.1	1.44				47.1	47.1	-1
modchains4	PRO	160	135	78.6	-0.17					81.8	81.8
modchains4	GLY	161	61.9	61.69	0.04					39.3	39.3
modchains4	SER	162	115.7	79.36	-0.02					69.1	69.1
modchains4	ARG	163	202	74.79	1.02	11.94				135.4	135.4	1
modchains4	GLY	164	53.6	53.43	0.04					48.9	48.9
modchains4	PRO	165	151.4	88.15	-0.17					82.6	82.6
modchains4	ILE	166	184.2	82.9	0.04		46.2			107.5	61.3
modchains4	GLY	167	34.5	34.39	0.04					37.1	37.1
modchains4	PRO	168	100.5	58.54	-0.17					64.5	64.5
modchains4	PRO	169	137.4	80.04	-0.17					77	77
modchains4	GLY	170	49.4	49.29	0.04					32.5	32.5
modchains4	ARG	171	156.4	57.92	1.02	11.66				116	116	1
modchains4	ALA	172	52.9	38.5	0.03					39.9	39.9
modchains4	GLY	173	61.8	61.6	0.04					39.8	39.8
modchains4	LYS	174	107.3	45.55	1.01	9.87	16.1			94.7	78.6	1
modchains4	ARG	175	183.8	68.07	1.02	11.8		32.1		119.8	87.8	1
modchains4	GLY	176	50.4	50.23	0.04			6.7		38.1	31.4
modchains4	LEU	177	184.3	81.23	-0.04		61.5			103.6	42.1
modchains4	LEU	178	192.1	84.64	-0.04		60.6			112.6	52
modchains4	GLY	179	58.2	57.98	0.04					45.5	45.5
modchains4	PRO	180	149	86.77	-0.17					85.9	85.9
modchains4	GLN	181	143.8	71.95	0					104.4	104.4
modchains4	GLY	182	47	46.88	0.04					41	41
modchains4	PRO	183	175.4	102.14	-0.17					91.9	91.9
modchains4	ARG	184	161.4	59.76	1.02	12.22				129.1	129.1	1
modchains4	GLY	185	91.5	91.25	0.04					52.6	52.6
modchains4	ASP	186	69.7	39.47	-1.1	2.39				56.5	56.5	-1
modchains4	LYS	187	192.6	81.8	1.01	10.08				124.5	124.5	1
modchains4	GLY	188	78.9	78.61	0.04					50.9	50.9
modchains4	ASP	189	153.7	87.01	-1.1	2.23				90.9	90.9	-1
modchains4	HIS	190	208.1	94.63	0.12	6.5				121.4	121.4
modchains4	GLY	191	63.6	63.44	0.04					43.8	43.8
modchains4	ASP	192	109.7	62.13	-1.1	2.94				76.9	76.9	-1
modchains4	ARG	193	178	65.9	1.02	12.29		57.2		123	65.8	1
modchains4	GLY	194	24.2	24.1	0.04					31.1	31.1
modchains4	ASP	195	81.5	46.11	-1.1	2.38				54.4	54.4	-1
modchains4	ARG	196	144.2	53.38	1.02	11.59				94.2	94.2	1
modchains4	GLY	197	66.4	66.19	0.04			0.5		45.1	44.5
modchains4	GLN	198	122.7	61.41	0			11		74.7	63.7
modchains4	LYS	199	157.5	66.88	3.66	6.65		104.4		127.7	23.3	4
modchains4	GLY	200	35.2	35.08	0.76			15.3		30.5	15.2	1
modchains4	HIS	201	141.9	64.54	0.28	6.97		13.6		94.9	81.3
modchains4	ARG	202	186.1	68.9	1.02	12.15				121.9	121.9	1
modchains4	GLY	203	82.3	82	-0.96	2.7				43.5	43.5	-1
