# Supplementary material for: Methacrylate Coatings for Titanium Surfaces to Optimize Biocompatibility
Source: Micromachines (Basel). 2020 Jan 13;11(1):87. doi: 10.3390/mi11010087 (PMC7019220; doi:10.3390/mi11010087)
Supplement: Supplementary file 1 [file micromachines-11-00087-s001.zip › S12.csv]

	pH	patch_hyd	patch_hyd_1	patch_hyd_2	patch_hyd_3	patch_hyd_4	patch_hyd_5	patch_hyd_n	patch_pos	patch_pos_1	patch_pos_2	patch_pos_3	patch_pos_4	patch_pos_5	patch_pos_n	patch_neg	patch_neg_1	patch_neg_2	patch_neg_3	patch_neg_4	patch_neg_5	patch_neg_n	patch_ion	patch_ion_1	patch_ion_2	patch_ion_3	patch_ion_4	patch_ion_5	patch_ion_n	ens_bb_pKa	ens_sc_pKa	ens_res_charge	ens_charge	ens_pI	ens_dipole	mass	debye	pI_seq	pI_3D	coeff_280	coeff_fric	coeff_diff	r_gyr	r_solv	sed_const	eccen	asa_vdw	asa_hyd	asa_hph
3GHG (Fibrinogen)	7.4000001	11430	470	870	1190	1470	1740	123	13750	320	580	810	1010	1180	212	12600	290	530	750	970	1170	182	26350	320	610	870	1110	1340	394	#NAME?	#NAME?	0 0 0 0 0 0 0 0 0 0 0 0 0 0 0 0 0 0 0 0 0 0 0 0 0 0 1 0 1 -1 0 -1 0 0 0 0 0 -1 -1 -1 0 0 0 1 0 0 0 0 0 1 0 1 0 0 0 -1 -1 0 0 0 -1 0 0 0 1 0 0 1 0 1 0 0 0 0 -1 0 0 1 0 0 1 -1 0 0 0 0 0 0 0 0 0 -1 0 0 1 0 -1 0 0 0 0 0 0 1 -1 0 0 0 0 1 0 0 -1 -1 0 1 0 1 0 -1 0 0 1 1 1 0 0 -1 1 0 0 0 0 0 0 0 0 1 0 0 1 0 0 0 0 -1 0 1 1 0 -1 0 -1 0 -1 0 1 0 1 0 0 1 0 0 0 0 1 0 0 0 1 -1 0 -1 0 1 -1 0 -1 -1 0 0 1 0 0 -1 …	-10		2945.5117	442.15381	9.6188574	6.0493164	6.3793945	812780	1.67E-10	2.49E-07	157.73218	99.300446	1.10E-12	0.03811058	177213	94489.211	74001.266
modchains4	7.4000001	1990	160	300	430	550	650	27	1290	270	460	600	730	830	13	850	100	170	230	290	350	17	2140	270	460	600	730	830	30	#NAME?	#NAME?	2 -1 0 0 0 0 0 1 0 -1 0 0 0 0 0 1 0 0 -1 1 0 0 0 0 0 0 0 0 0 0 -1 3 1 -1 0 0 -1 -1 0 0 0 0 0 -1 0 0 0 0 0 0 0 0 0 0 0 1 0 0 0 0 0 0 0 0 1 0 -1 1 0 0 0 0 0 0 0 0 0 0 0 0 0 1 0 0 0 0 0 0 0 0 -1 2 1 0 0 0 0 0 0 0 0 0 0 0 0 0 0 0 -1 0 0 0 -1 0 0 0 0 0 -1 0 0 0 0 1 -1 0 0 0 0 -1 1 0 -1 1 0 -1 0 0 0 0 0 0 0 0 0 1 0 0 0 0 0 0 0 0 0 0 0 0 0 -1 0 0 0 1 0 -1 0 0 0 1 0 0 0 0 0 0 0 1 0 0 1 1 0 0 0 0 0 0 0 0 …	17		27028.172	59.484398	9.6188574	9.9643555	7.3569336	0	3.35E-10	1.23E-07	250.68517	199.98444	7.36E-14	0.17050301	72794.57	45869.711	23949.262
1AO6 (Albumin)	7.4000001	1160	170	310	430	520	610	14	1850	300	520	610	700	770	28	2810	270	410	550	670	770	45	4660	300	570	790	930	1070	73	#NAME?	#NAME?	0 0 0 0 1 -1 0 0 0 1 0 1 -1 0 0 -1 -1 0 0 1 0 0 0 0 0 0 0 0 0 0 0 0 0 0 0 0 -1 -1 0 0 1 0 0 0 -1 0 0 -1 0 0 1 0 0 0 0 -1 -1 0 0 -1 0 0 -1 1 0 0 0 0 0 0 0 -1 1 0 0 0 0 0 0 0 1 -1 0 0 0 -1 0 0 -1 0 0 0 1 0 -1 0 -1 1 0 -1 0 0 0 0 0 1 -1 -1 0 0 0 0 0 1 0 0 1 0 -1 0 -1 0 0 0 0 0 0 0 -1 0 -1 -1 0 0 0 1 1 0 0 0 -1 0 0 1 1 0 0 0 0 0 0 0 -1 0 0 0 0 0 1 1 0 1 0 0 0 0 -1 0 0 0 0 0 -1 1 0 0 0 0 0 0 1 0 -1 -1…	-14		1406.3073	65.679352	9.6188574	5.5415039	5.5922852	34445	5.96E-11	6.95E-07	26.451775	35.538601	4.57E-13	0.8633604	26924.277	14295.187	11235.284
3M7P (Fibronectin)	7.4000001	1160	290	440	550	650	730	12	890	80	160	230	290	350	17	690	130	200	260	310	360	13	1580	130	210	290	360	430	30	#NAME?	#NAME?	1 0 0 0 0 0 0 0 0 0 0 0 0 0 -1 0 0 0 0 0 0 0 0 0 0 0 0 1 0 0 0 0 1 0 0 0 0 0 0 0 0 0 0 0 0 0 0 -1 0 0 0 0 0 0 0 0 0 0 0 0 0 -1 0 0 0 0 0 0 0 0 0 0 1 0 0 0 0 0 0 0 -1 0 1 0 -1 0 0 0 0 0 0 0 0 0 0 0 -1 0 -1 0 1 0 0 0 0 0 -1 0 0 0 0 0 0 0 1 0 0 0 0 0 0 0 0 0 0 0 0 0 0 0 0 0 0 0 0 0 -1 0 0 0 -1 0 1 1 -1 0 0 1 0 0 0 0 0 0 0 0 -1 0 -1 0 1 0 0 0 0 0 0 0 0 0 -1 -1 0 0 0 0 0 -1 0 0 0 0 1 0 0 -1 0 0 -1 1 0…	4		789.58844	34.739353	9.6188574	5.5922852	5.4272461	71695	4.72E-11	8.78E-07	23.717354	28.113287	3.06E-13	0.21532393	16035.782	8291.0928	6711.6533
4BYH (IgG Fc)	7.4000001	1000	150	300	390	480	560	12	1530	110	210	310	400	480	27	1260	110	210	310	390	470	21	2790	110	220	320	420	520	48	#NAME?	#NAME?	0 0 0 0 0 0 0 0 0 0 0 0 0 0 0 0 1 0 0 0 0 0 0 0 1 0 1 -1 0 0 0 0 0 1 0 0 -1 0 0 0 0 0 0 -1 0 0 0 -1 -1 0 -1 0 1 0 0 0 0 0 -1 0 0 -1 0 0 0 0 1 0 1 0 1 -1 -1 0 0 0 0 0 0 1 0 0 0 0 0 0 0 0 0 0 -1 0 0 0 0 1 -1 0 1 0 1 0 0 0 1 0 0 0 0 0 0 -1 1 0 0 0 1 0 1 0 0 0 1 -1 0 0 0 0 0 0 0 0 0 1 -1 -1 0 0 1 0 0 0 0 0 0 0 0 0 1 0 0 0 0 0 -1 0 0 0 -1 0 -1 0 0 0 0 0 -1 0 0 0 1 0 0 0 0 0 0 -1 0 -1 0 0 0 0 0 0 0 1 0…	2		401.71707	47.239914	9.6188574	6.8588867	8.1479492	71320	5.58E-11	7.42E-07	25.886311	33.283951	3.51E-13	0.70989627	21844.318	11262.279	9491.6221
[truncated: 20 more columns]
