# Supplementary material for: Methacrylate Coatings for Titanium Surfaces to Optimize Biocompatibility
Source: Micromachines (Basel). 2020 Jan 13;11(1):87. doi: 10.3390/mi11010087 (PMC7019220; doi:10.3390/mi11010087)
Supplement: Supplementary file 1 [file micromachines-11-00087-s001.zip › S13.csv]

Name	Description	Class
patch_hyd	Area of hydrophobic protein patch(es)	ProPatch
patch_hyd_1	Area of largest hydrophobic protein patch(es)	ProPatch
patch_hyd_2	Area of 2 largest hydrophobic protein patch(es)	ProPatch
patch_hyd_3	Area of 3 largest hydrophobic protein patch(es)	ProPatch
patch_hyd_4	Area of 4 largest hydrophobic protein patch(es)	ProPatch
patch_hyd_5	Area of 5 largest hydrophobic protein patch(es)	ProPatch
patch_hyd_n	Count of hydrophobic protein patch(es)	ProPatch
patch_pos	Area of positive protein patch(es)	ProPatch
patch_pos_1	Area of largest positive protein patch(es)	ProPatch
patch_pos_2	Area of 2 largest positive protein patch(es)	ProPatch
patch_pos_3	Area of 3 largest positive protein patch(es)	ProPatch
patch_pos_4	Area of 4 largest positive protein patch(es)	ProPatch
patch_pos_5	Area of 5 largest positive protein patch(es)	ProPatch
patch_pos_n	Count of positive protein patch(es)	ProPatch
patch_neg	Area of negative protein patch(es)	ProPatch
patch_neg_1	Area of largest negative protein patch(es)	ProPatch
patch_neg_2	Area of 2 largest negative protein patch(es)	ProPatch
patch_neg_3	Area of 3 largest negative protein patch(es)	ProPatch
patch_neg_4	Area of 4 largest negative protein patch(es)	ProPatch
patch_neg_5	Area of 5 largest negative protein patch(es)	ProPatch
patch_neg_n	Count of negative protein patch(es)	ProPatch
patch_ion	Area of ionic protein patch(es)	ProPatch
patch_ion_1	Area of largest ionic protein patch(es)	ProPatch
patch_ion_2	Area of 2 largest ionic protein patch(es)	ProPatch
patch_ion_3	Area of 3 largest ionic protein patch(es)	ProPatch
patch_ion_4	Area of 4 largest ionic protein patch(es)	ProPatch
patch_ion_5	Area of 5 largest ionic protein patch(es)	ProPatch
patch_ion_n	Count of ionic protein patch(es)	ProPatch
ens_bb_pKa	Ensemble Backbone pKa	Titration
ens_sc_pKa	Ensemble Sidechain pKa	Titration
ens_res_charge	Ensemble Residue Charge	Titration
ens_charge	Ensemble Net Charge	Titration
ens_pI	Ensemble Isoelectric Point	Titration
ens_dipole	Ensemble Dipole Moment	Titration
mass	Protein Mass in kDa	Molecular
debye	Debye Screening Length	Molecular
pI_seq	Sequence-based pI Prediction	Molecular
pI_3D	Structure-based pI Prediction	Molecular
coeff_280	Extinction coefficient at 280 nm	Molecular
coeff_fric	Frictional Coefficient	Molecular
coeff_diff	Diffusion Coefficient	Molecular
r_gyr	Radius of Gyration	Molecular
r_solv	Hydrodynamic Radius	Molecular
sed_const	Sedimentation Constant	Molecular
eccen	Protein Eccentricity	Molecular
asa_vdw	Accessible Surface Area (Water Probe)	Molecular
asa_hyd	Hydrophobic Surface Area	Molecular
asa_hph	Hydrophilic Surface Area	Molecular
volume	Protein Volume	Molecular
mobility	Protein Mobility	Molecular
helicity	Protein Helix Ratio	Molecular
henry	Henry's Function f(ka)	Molecular
net_charge	Protein Net Charge	Molecular
app_charge	Protein Charge at Debye Length	Molecular
dipole_moment	Protein Dipole Moment	Molecular
hyd_moment	Hydrophobicity Moment	Molecular
zeta	Zeta potential at Debye Length	Molecular
zdipole	Zeta Dipole Moment	Molecular
zquadrupole	Zeta Quadrupole Moment	Molecular
res_hyd	Hydrophobic Residue Patch Area	ResPatch
res_pos	Positive Residue Patch Area	ResPatch
res_neg	Negative Residue Patch Area	ResPatch
res_oth	Non-Patch Residue Surface Area	ResPatch
res_tot	Total Residue Surface Area	ResPatch
res_exp	Residue Percent Exposure	Residue
res_ASA	Residue ASA	Residue
res_charge	Residue Charge	Residue
propKa	PropKa	Residue
