# Supplementary material for: Methacrylate Coatings for Titanium Surfaces to Optimize Biocompatibility
Source: Micromachines (Basel). 2020 Jan 13;11(1):87. doi: 10.3390/mi11010087 (PMC7019220; doi:10.3390/mi11010087)
Supplement: Supplementary file 1 [file micromachines-11-00087-s001.zip › S14.csv]

mol	AM1_dipole	AM1_E	AM1_Eele	AM1_HF	AM1_HOMO	AM1_IP	AM1_LUMO	apol	ASA	ASA+	ASA-	ASA_H	ASA_P	ast_fraglike	ast_fraglike_ext	ast_violation	ast_violation_ext	a_acc	a_acid	a_aro	a_base	a_count	a_don	a_donacc	a_heavy	a_hyd	a_IC	a_ICM	a_nB	a_nBr	a_nC	a_nCl	a_nF	a_nH	a_nI	a_nN	a_nO	a_nP	a_nS	balabanJ	BCUT_PEOE_0	BCUT_PEOE_1	BCUT_PEOE_2	BCUT_PEOE_3	BCUT_SLOGP_0	BCUT_SLOGP_1	BCUT_SLOGP_2	BCUT_SLOGP_3	BCUT_SMR_0
253L (Lysozyme)	0							2808.7622	8718.4492	0	0	8718.4492	0	0	0	3	5	206	36	98	53	2643	206	412	1306	616	4402.2861	1.6656399	0	0	823	0	0	1337	0	238	240	0	5	0.37631631	-2.7061777	-0.54973859	0.46620643	2.7515554	-3.3092694	-0.52870142	0.39390323	2.7067144	-2.4599721
4Y99 (Cardiac Troponin)	0							6170.5225	21397.191	0	0	21397.191	0	0	0	3	5	425	160	138	112	5755	418	843	2872	1300	9704.6426	1.6862975	0	0	1780	0	0	2883	0	498	579	0	12	0.059841789	-2.7098956	-0.54981971	0.43639469	2.7594416	-3.3209023	-0.4966071	0.39303875	2.7031512	-2.4649971
1NCX (Troponin C)	0							3001.2534	10788.826	0	0	10788.826	0	0	0	3	5	341	96	71	31	2938	340	681	1433	568	5046.9263	1.7178102	0	0	781	0	0	1505	0	202	435	0	13	-0.026297925	-2.7086499	-0.54981971	0.43678108	2.7461398	-3.3055229	-0.49960065	0.3930881	2.6983356	-2.4577889
MeTro1	0							1479.0846	8531.2559	0	0	8531.2559	0	0	0	3	5	101	28	38	34	1401	93	194	684	317	2298.2449	1.6404318	0	0	434	0	0	717	0	123	127	0	0	1.1733594	-2.7116795	-0.54981971	0.46620843	2.714397	-3.3646488	-0.48260996	0.3556889	2.699086	-2.4701023
MeTro3Lmin	0							4369.9077	21870.053	0	0	21870.053	0	0	0	3	5	303	106	114	122	4102	278	581	2052	923	6795.416	1.6566105	0	0	1302	0	0	2050	0	369	381	0	0	0.15506512	-2.9450507	-0.55092472	0.46638605	3.2071102	-3.4188235	-0.53807992	0.39390171	3.1694551	-2.5006316
GelMA2	0							754.64734	5569.8091	0	0	5569.8091	0	0	0	3	5	59	34	15	27	702	49	108	375	133	1219.6492	1.7373919	0	0	221	0	0	327	0	81	73	0	0	0.26664403	-5.6189613	-0.58047831	0.43286991	4.6728115	-4.5291376	-0.5614602	0.4012922	5.7761502	-4.2302222
[truncated: 456 more columns]
