# Supplementary material for: Methacrylate Coatings for Titanium Surfaces to Optimize Biocompatibility
Source: Micromachines (Basel). 2020 Jan 13;11(1):87. doi: 10.3390/mi11010087 (PMC7019220; doi:10.3390/mi11010087)
Supplement: Supplementary file 1 [file micromachines-11-00087-s001.zip › S16.xlsx]

## Sheet: T0002-10.1080_08927014.2013.834
D. Kohavi, L. Badihi, G. Rosen, D. Steinberg & M.N. Sela (2013) An in_xFFFF_vivo
method for measuring the adsorption of plasma proteins to titanium in humans, Biofouling, 29:10,
1215-1224, DOI: 10.1080/08927014.2013.834332
Rod num.	Pa.	Rod site	Rod surf.	Protein [ÂµgÂ mmâˆ’2]
ALB	FNC	FBR	IgG
A				ALB	FNC	FBR	IgG		ALB	FNC	FBR	IgG
1	E.B.	Ur1PM	M	0.0013	0.0018	0.0015	0.0006	M	0.0013	0.0018	0.0015	0.0006
2	E.B.	Ur2PM	AE	0.0024	0.0039	0.0022	0.0013	M	0.0024	0.0019	0.0022	0.0017
3	E.B.	Ur1M	B & AE	0.0047	0.0085	0.0069	0.0035	M	0.0016	0.0004	0.0011	0.0006
4	D.F.	Lr2M	M	0.0024	0.0019	0.0022	0.0017	M	0.0016	0.0017	0.0008	0.0019
5	D.F.	Lr1M	AE	0.0044	0.0037	0.0038	0.0033	M	0.0009	0.001	0.0005	0.0009
6	D.F.	Lr2PM	B & AE	0.0099	0.0081	0.0084	0.0091	M	0.0016	0.0007	0.0005	0.0016
7	Y.M.	LrC	M	0.0016	0.0004	0.0011	0.0006	M	0.0016	0.0019	0.0015	0.001
8	Y.M.	Lr1M	AE	0.0033	0.001	0.003	0.0013	M	0.0016	0.0013	0.0011	0.0006
9	Y.M.	LlC	AE	0.0049	0.0009	0.0027	0.0016	M	0.0016	0.0026	0.0013	0.0007
10	Y.M.	Ll1M	B & AE	0.0084	0.0023	0.0043	0.0027	M	0.0019	0.003	0.0011	0.0005
11	A.A.	Ul1PM	M	0.0016	0.0017	0.0008	0.0019	M	0.0017	0.0019	0.0012	0.0006
12	A.A.	Ul2PM	AE	0.0046	0.0039	0.0014	0.0025		0.00161818	0.00165455	0.00116364	0.000972727
13	A.A.	Ul1M	B & AE	0.0062	0.0056	0.0033	0.0065		0.000109394	0.000232521	0.000146022	0.000154973
14	A.F.	Ur1PM	M	0.0009	0.001	0.0005	0.0009	AE	0.0024	0.0039	0.0022	0.0013
15	A.F.	Ur1M	B & AE	0.0049	0.0036	0.0021	0.0035	AE	0.0044	0.0037	0.0038	0.0033
16	R.A.	Lr1M	M	0.0016	0.0007	0.0005	0.0016	AE	0.0033	0.001	0.003	0.0013
17	R.A.	Lr2M	B & AE	0.0063	0.0036	0.0019	0.0056	AE	0.0049	0.0009	0.0027	0.0016
18	V.Z.	Ll1PM	M	0.0016	0.0019	0.0015	0.001	AE	0.0046	0.0039	0.0014	0.0025
19	V.Z.	Ll1M	B & AE	0.0056	0.0072	0.0056	0.005	AE	0.0025	0.0035	0.0018	0.0012
20	I.G.	Ll1M	M	0.0016	0.0013	0.0011	0.0006	AE	0.0028	0.0036	0.0016	0.0009
21	I.G.	Ll2M	B & AE	0.0051	0.0056	0.0041	0.0023	AE	0.0028	0.0036	0.0016	0.0011
22	D.A.	Ur1PM	M	0.0016	0.0026	0.0013	0.0007		0.0034625	0.0030125	0.0022625	0.00165
23	D.A.	Ur2PM	AE	0.0025	0.0035	0.0018	0.0012		0.000358537	0.000452942	0.000296971	0.000291548
24	D.A.	Ur1M	B & AE	0.0079	0.0148	0.0042	0.0032	B & AE	0.0047	0.0085	0.0069	0.0035
25	D.A.	Ul1PM	M	0.0019	0.003	0.0011	0.0005	B & AE	0.0099	0.0081	0.0084	0.0091
26	D.A.	Ul2PM	AE	0.0028	0.0036	0.0016	0.0009	B & AE	0.0084	0.0023	0.0043	0.0027
27	D.A.	Ul1M	B & AE	0.0088	0.0144	0.0047	0.0025	B & AE	0.0062	0.0056	0.0033	0.0065
28	R.N.	Ll1M	M	0.0017	0.0019	0.0012	0.0006	B & AE	0.0049	0.0036	0.0021	0.0035
29	R.N.	Lr2M	AE	0.0028	0.0036	0.0016	0.0011	B & AE	0.0063	0.0036	0.0019	0.0056
30	R.N.	Lr1M	B & AE	0.0078	0.0089	0.0042	0.0021	B & AE	0.0056	0.0072	0.0056	0.005
31	P.C.	Ll2PM	M	XPS total protein examination				B & AE	0.0051	0.0056	0.0041	0.0023
32	P.C.	Ll1M	AE	XPS total protein examination				B & AE	0.0079	0.0148	0.0042	0.0032
33	P.C.	Ll2M	B & AE	XPS total protein examination				B & AE	0.0088	0.0144	0.0047	0.0025
Rod num.	Pa.	Rod site	Rod treatment	Protein [ÂµgÂ mmâˆ’2]				B & AE	0.0078	0.0089	0.0042	0.0021
	"ALB"		"FNC"		"FBR"		"IgG"		0.00687273	0.00750909	0.00451818	0.00418182
B									0.000533273	0.00123946	0.000576481	0.000653914
1	A.Y.	Ur1M	Nonwetted	0.0043	0.00364	0.00213	0.00115
2	A.Y.	Ur2PM	Wetted	0.00541	0.00537	0.00239	0.00111
3	Z.A.	LlC	Nonwetted	0.00899	0.00665	0.004	0.00396
4	Z.A.	Ll1PM	Wetted	0.00922	0.00863	0.0043	0.00445
5	Z.A.	LlPM	Nonwetted	0.01246	0.00528	0.00513	0.00675
6	Z.A.	Ll1M	Wetted	0.01304	0.00728	0.0052	0.00754
7	Z.A.	LrC	Nonwetted	0.00856	0.00863	0.00445	0.00379
8	Z.A.	Lr1PM	Wetted	0.01095	0.00946	0.00498	0.00452
9	Z.A.	Lr2PM	Nonwetted	0.00654	0.01076	0.00373	0.00383
10	Z.A.	Lr1M	Wetted	0.00735	0.01284	0.00377	0.00435
11	Y.Y.	Lr2PM	Nonwetted	0.00677	0.00251	0.00106	0.00403
12	Y.Y.	Lr1M	Wetted	0.00863	0.00271	0.00106	0.00379
13	Z.R.	Ur1M	Nonwetted	0.00526	0.00714	0.00361	0.00352
14	Z.R.	Ur2M	Wetted	0.00668	0.00811	0.00419	0.00406
15	G.Y.	Ul2PM	Nonwetted	0.00828	0.00817	0.00548	0.00577
16	G.Y.	Ul1M	Wetted	0.00964	0.00942	0.0066	0.0065
17	N.S.	Lr1M	Nonwetted	0.0092	0.00873	0.00329	0.00324
18	N.S.	Lr2PM	Wetted	0.01086	0.01172	0.00386	0.00408

## Sheet: Sheet1
Cindy Goes Dodo , Plinio Mendes Senna , William Custodio , Adriana
Franco Paes Leme & Altair Antoninha Del Bel Cury (2013) Proteome analysis of the
plasma protein layer adsorbed to a rough titanium surface, Biofouling, 29:5, 549-557, DOI:
10.1080/08927014.2013.787416
	ALB	FNC	FBR	IgG
spectral counts	35	146	44	1
mol	pH	patch_hyd	patch_hyd_1	patch_hyd_2	patch_hyd_3	patch_hyd_4	patch_hyd_5	patch_hyd_n	patch_pos	patch_pos_1	patch_pos_2	patch_pos_3	patch_pos_4	patch_pos_5	patch_pos_n	patch_neg	patch_neg_1	patch_neg_2	patch_neg_3	patch_neg_4	patch_neg_5	patch_neg_n	patch_ion	patch_ion_1	patch_ion_2	patch_ion_3	patch_ion_4	patch_ion_5	patch_ion_n	ens_bb_pKa	ens_sc_pKa	ens_res_charge	ens_charge	ens_pI	ens_dipole	mass	debye	pI_seq	pI_3D	coeff_280	coeff_fric	coeff_diff	r_gyr	r_solv	sed_const	eccen	asa_vdw	asa_hyd	asa_hph
1FIC	7.4	1020	140	270	390	500	610	12	1120	90	180	270	350	430	20	1170	100	200	270	330	390	21	2290	100	200	290	380	470	41	#NAME?	#NAME?	0 1 0 0 -1 0 0 0 1 -1 0 0 -1 0 0 0 1 0 0 1 0 0 0 0 0 0 0 1 0 0 1 0 0 0 0 0 0 0 0 0 -1 0 -1 0 0 0 0 0 0 0 0 0 0 1 1 0 -1 0 0 0 -1 0 1 1 0 0 0 0 0 1 -1 0 0 0 0 0 0 0 0 0 0 0 -1 0 0 0 0 0 -1 1 0 0 0 0 0 0 0 0 0 0 0 0 0 0 1 0 -1 0 -1 -1 0 0 0 1 0 0 0 0 -1 0 0 0 0 1 0 0 0 -1 0 -1 1 0 1 0 0 0 0 0 0 0 0 0 -1 0 0 -1 0 0 -1 0 0 -1 0 0 -1 -1 0 0 -1 1 0 0 0 0 0 0 0 0 0 0 0 0 0 -1 0 -1 0 -1 1 0 -1 0 0 0 0 -1…	-2		1318.9	58.4569	9.61886	6.29053	5.74463	149240	5.37584e-11	7.70481e-07	25.9296	32.0446	4.51447e-13	0.279776	20746.4	10925.1	8831.3
mol	pH	patch_hyd	patch_hyd_1	patch_hyd_2	patch_hyd_3	patch_hyd_4	patch_hyd_5	patch_hyd_n	patch_pos	patch_pos_1	patch_pos_2	patch_pos_3	patch_pos_4	patch_pos_5	patch_pos_n	patch_neg	patch_neg_1	patch_neg_2	patch_neg_3	patch_neg_4	patch_neg_5	patch_neg_n	patch_ion	patch_ion_1	patch_ion_2	patch_ion_3	patch_ion_4	patch_ion_5	patch_ion_n	ens_bb_pKa	ens_sc_pKa	ens_res_charge	ens_charge	ens_pI	ens_dipole	mass	debye	pI_seq	pI_3D	coeff_280	coeff_fric	coeff_diff	r_gyr	r_solv	sed_const	eccen	asa_vdw	asa_hyd	asa_hph
1NPE	7.4	820	170	270	360	440	520	10	1400	190	350	480	600	700	18	810	100	190	270	340	410	14	2210	190	350	480	600	700	32	#NAME?	#NAME?	1 0 0 0 0 0 0 0 0 0 1 0 -1 1 0 0 0 -1 1 0 0 0 1 1 0 -1 0 1 0 0 0 0 0 0 0 1 0 0 0 0 0 0 0 -1 0 0 -1 1 0 0 0 0 0 -1 0 0 -1 0 0 0 0 1 0 0 0 0 0 0 -1 0 0 0 0 0 1 0 -1 0 0 0 0 -1 0 0 0 0 -1 0 0 0 1 0 0 0 0 0 -1 0 0 0 -1 1 0 -1 0 0 1 0 -1 0 0 0 1 1 0 0 0 -1 0 0 0 0 0 0 1 0 0 0 0 -1 0 0 1 0 0 0 0 0 0 -1 0 0 1 -1 0 0 1 0 -1 0 0 0 0 -1 0 0 0 1 1 0 0 0 0 -1 0 0 0 0 0 0 0 0 0 0 -1 0 0 0 0 0 0 0 0 0 -1 0 0 0…	13		965.518	47.525	9.61886	6.30322	7.75244	54120	5.18126e-11	7.99416e-07	24.6426	30.8848	3.80806e-13	0.438202	19552.6	10354.9	8261.08
mol	pH	patch_hyd	patch_hyd_1	patch_hyd_2	patch_hyd_3	patch_hyd_4	patch_hyd_5	patch_hyd_n	patch_pos	patch_pos_1	patch_pos_2	patch_pos_3	patch_pos_4	patch_pos_5	patch_pos_n	patch_neg	patch_neg_1	patch_neg_2	patch_neg_3	patch_neg_4	patch_neg_5	patch_neg_n	patch_ion	patch_ion_1	patch_ion_2	patch_ion_3	patch_ion_4	patch_ion_5	patch_ion_n	ens_bb_pKa	ens_sc_pKa	ens_res_charge	ens_charge	ens_pI	ens_dipole	mass	debye	pI_seq	pI_3D	coeff_280	coeff_fric	coeff_diff	r_gyr	r_solv	sed_const	eccen	asa_vdw	asa_hyd	asa_hph
1RE4	7.4	2490	180	320	460	590	690	34	3590	180	310	430	540	650	56	2600	240	430	550	640	730	43	6190	240	430	610	740	860	99	#NAME?	#NAME?	1 0 -1 1 0 0 0 0 0 0 0 0 1 0 0 1 0 0 0 0 -1 0 1 1 0 -1 0 -1 0 -1 0 1 0 1 0 0 1 0 0 0 0 1 0 0 0 1 -1 0 -1 0 1 -1 0 -1 -1 0 0 1 0 0 -1 0 0 0 0 0 0 0 0 0 0 0 -1 0 0 0 0 0 0 0 0 0 0 1 0 0 1 0 0 0 -1 0 0 1 0 1 0 0 1 0 -1 0 -1 0 0 0 0 0 -1 0 0 1 0 0 0 0 0 0 0 0 0 0 0 0 0 0 1 -1 0 -1 -1 0 0 1 1 0 0 -1 0 0 -1 0 0 0 0 0 0 -1 0 0 0 1 0 0 1 0 0 0 -1 0 0 0 -1 0 0 0 0 0 0 0 0 0 1 0 -1 0 0 0 -1 0 0 1 1 0 -1 0 …	14		3634.47	150.747	9.61886	6.46826	7.12256	340850	7.9116e-11	5.23532e-07	57.5293	47.1599	7.91044e-13	0.0671263	53362.1	27933.4	22768
mol	pH	patch_hyd	patch_hyd_1	patch_hyd_2	patch_hyd_3	patch_hyd_4	patch_hyd_5	patch_hyd_n	patch_pos	patch_pos_1	patch_pos_2	patch_pos_3	patch_pos_4	patch_pos_5	patch_pos_n	patch_neg	patch_neg_1	patch_neg_2	patch_neg_3	patch_neg_4	patch_neg_5	patch_neg_n	patch_ion	patch_ion_1	patch_ion_2	patch_ion_3	patch_ion_4	patch_ion_5	patch_ion_n	ens_bb_pKa	ens_sc_pKa	ens_res_charge	ens_charge	ens_pI	ens_dipole	mass	debye	pI_seq	pI_3D	coeff_280	coeff_fric	coeff_diff	r_gyr	r_solv	sed_const	eccen	asa_vdw	asa_hyd	asa_hph
1S4G	7.4	310	150	210	260	310	310	4	0	0	0	0	0	0	0	0	0	0	0	0	0	0	0	0	0	0	0	0	0	#NAME?	#NAME?	0 0 -1 0 0 1 0 1 0 0 -1 0 0 0 0 -1 1 1 0 0 0 -1 -1 0 0 0 0 0 0 0 0 0 0 -1 0 0 0 -1 0 1 0 0 0 0 1 0 -1 0 0 0 0 0	-2		57.9728	5.80767	9.61886	4.18311	3.31982	4970	2.07437e-11	1.99674e-06	10.8897	12.365	1.16234e-13	0.284561	3395.96	2257.74	1032.26
mol	pH	patch_hyd	patch_hyd_1	patch_hyd_2	patch_hyd_3	patch_hyd_4	patch_hyd_5	patch_hyd_n	patch_pos	patch_pos_1	patch_pos_2	patch_pos_3	patch_pos_4	patch_pos_5	patch_pos_n	patch_neg	patch_neg_1	patch_neg_2	patch_neg_3	patch_neg_4	patch_neg_5	patch_neg_n	patch_ion	patch_ion_1	patch_ion_2	patch_ion_3	patch_ion_4	patch_ion_5	patch_ion_n	ens_bb_pKa	ens_sc_pKa	ens_res_charge	ens_charge	ens_pI	ens_dipole	mass	debye	pI_seq	pI_3D	coeff_280	coeff_fric	coeff_diff	r_gyr	r_solv	sed_const	eccen	asa_vdw	asa_hyd	asa_hph
2I07	7.4	2720	190	360	510	640	750	33	4100	180	320	450	560	660	72	5940	370	660	850	1020	1170	79	10040	370	660	850	1030	1200	151	#NAME?	#NAME?	1 0 0 0 0 0 0 0 0 0 0 0 1 0 -1 0 -1 -1 0 0 0 0 -1 0 0 -1 0 0 0 -1 0 0 0 0 0 0 0 0 -1 0 0 0 1 1 0 0 0 0 0 -1 1 0 0 0 0 0 0 0 0 0 0 0 0 0 0 0 0 0 0 0 0 0 0 0 0 0 0 0 0 2 0 1 0 0 0 0 0 0 0 0 0 0 0 0 0 -1 1 0 0 0 0 0 0 0 0 0 0 0 0 0 0 0 -1 1 0 0 0 0 0 0 0 0 0 0 0 1 0 0 0 0 0 0 1 0 0 0 0 0 1 0 0 0 0 0 0 -1 0 0 -1 0 0 0 0 1 0 -1 0 0 0 0 0 0 0 0 0 0 0 0 0 0 0 -1 0 0 -1 0 0 0 0 0 0 0 1 0 1 0 0 0 -1 0 0 0…	-26		5898.97	172.769	9.61886	5.42725	5.63037	176700	8.76516e-11	4.72551e-07	46.2968	52.2479	8.18319e-13	0.32371	65321.6	32683.9	29432.9
mol	pH	patch_hyd	patch_hyd_1	patch_hyd_2	patch_hyd_3	patch_hyd_4	patch_hyd_5	patch_hyd_n	patch_pos	patch_pos_1	patch_pos_2	patch_pos_3	patch_pos_4	patch_pos_5	patch_pos_n	patch_neg	patch_neg_1	patch_neg_2	patch_neg_3	patch_neg_4	patch_neg_5	patch_neg_n	patch_ion	patch_ion_1	patch_ion_2	patch_ion_3	patch_ion_4	patch_ion_5	patch_ion_n	ens_bb_pKa	ens_sc_pKa	ens_res_charge	ens_charge	ens_pI	ens_dipole	mass	debye	pI_seq	pI_3D	coeff_280	coeff_fric	coeff_diff	r_gyr	r_solv	sed_const	eccen	asa_vdw	asa_hyd	asa_hph
2N5E	7.4	4010	580	1010	1440	1790	2130	20	1720	120	240	360	480	590	26	2610	170	340	490	640	750	42	4330	170	340	490	640	760	68	#NAME?	#NAME?	1 0 0 0 1 0 1 -1 0 0 0 0 0 0 0 -1 0 0 -1 0 0 -1 1 -1 0 -1 0 0 1 0 -1 0 0 1 -1 0 -1 -1 0 1 0 1 0 0 0 0 0 -1 -1 0 0 1 1 0 0 -1 -1 0 -1 0 0 1 0 1 0 -1 0 0 0 -1 -1 0 1 -1 1 0 1 0 0 0 -1 0 0 1 0 0 0 0 0 0 0 -1 -1 0 1 0 1 0 0 0 1 0 -1 0 0 1 -1 0 0 0 0 1 0 0 -1 0 0 0 1 0 0 -1 0 0 0 0 0 0 -1 1 0 1 0 0 0 -1 -1 0 1 0 0 0 0 0 0 0 -1 0 0 1 0 0 0 0 0 0 0 -1 -1 0 0 1 1 0 0 0 0 1 0 0 0 1 0 1 -1 0 0 0 0 0 0 0 -1…	-8		1168.92	38.8239	9.61886	5.47803	5.69385	36900	7.69655e-11	5.38161e-07	38.6007	45.878	2.09421e-13	0.94483	28667.5	16444.4	10824.7
mol	pH	patch_hyd	patch_hyd_1	patch_hyd_2	patch_hyd_3	patch_hyd_4	patch_hyd_5	patch_hyd_n	patch_pos	patch_pos_1	patch_pos_2	patch_pos_3	patch_pos_4	patch_pos_5	patch_pos_n	patch_neg	patch_neg_1	patch_neg_2	patch_neg_3	patch_neg_4	patch_neg_5	patch_neg_n	patch_ion	patch_ion_1	patch_ion_2	patch_ion_3	patch_ion_4	patch_ion_5	patch_ion_n	ens_bb_pKa	ens_sc_pKa	ens_res_charge	ens_charge	ens_pI	ens_dipole	mass	debye	pI_seq	pI_3D	coeff_280	coeff_fric	coeff_diff	r_gyr	r_solv	sed_const	eccen	asa_vdw	asa_hyd	asa_hph
2QUG	7.4	540	80	150	210	270	330	9	890	160	250	320	370	420	16	1680	220	340	450	550	630	26	2570	220	380	500	610	710	42	#NAME?	#NAME?	0 0 0 0 0 0 0 0 0 0 0 0 0 0 0 0 0 0 0 0 0 0 0 1 1 0 0 0 0 0 0 -1 0 0 0 0 0 0 1 0 0 0 0 0 0 0 0 0 0 0 0 0 0 0 0 0 0 0 0 0 0 0 0 0 0 0 0 0 1 0 -1 0 0 -1 -1 0 0 -1 0 0 0 0 0 0 0 -1 0 0 -1 0 0 0 0 -1 0 0 0 -1 0 0 1 0 0 0 0 0 -1 0 0 0 0 0 0 0 0 0 0 0 0 0 0 -1 0 0 1 0 0 -1 1 0 0 -1 -1 0 1 1 0 0 0 0 -1 0 0 0 0 0 0 0 -1 0 -1 -1 0 1 1 0 0 0 -1 0 0 -1 1 0 0 0 0 1 0 0 -1 0 0 1 -1 0 -1 1 -1 0 0 0 0 0 0 0 0 0…	-10		783.653	41.5167	9.61886	5.49072	5.13525	19940	4.83407e-11	8.56831e-07	21.5526	28.8152	3.56555e-13	0.312337	16288	8344.08	7158.89
mol	pH	patch_hyd	patch_hyd_1	patch_hyd_2	patch_hyd_3	patch_hyd_4	patch_hyd_5	patch_hyd_n	patch_pos	patch_pos_1	patch_pos_2	patch_pos_3	patch_pos_4	patch_pos_5	patch_pos_n	patch_neg	patch_neg_1	patch_neg_2	patch_neg_3	patch_neg_4	patch_neg_5	patch_neg_n	patch_ion	patch_ion_1	patch_ion_2	patch_ion_3	patch_ion_4	patch_ion_5	patch_ion_n	ens_bb_pKa	ens_sc_pKa	ens_res_charge	ens_charge	ens_pI	ens_dipole	mass	debye	pI_seq	pI_3D	coeff_280	coeff_fric	coeff_diff	r_gyr	r_solv	sed_const	eccen	asa_vdw	asa_hyd	asa_hph
2WXW	7.4	1190	340	470	570	660	740	13	1100	110	210	290	350	410	20	1380	120	230	340	450	530	21	2480	120	230	340	450	560	41	#NAME?	#NAME?	1 -1 1 0 0 0 0 0 0 0 0 0 0 0 0 -1 0 0 0 -1 0 0 0 1 0 0 0 0 1 0 1 -1 0 0 0 0 0 0 0 0 0 0 1 0 0 0 0 -1 -1 1 0 0 0 -1 0 0 0 0 0 0 0 1 0 -1 0 -1 -1 1 0 1 0 0 0 0 0 0 0 0 0 0 0 0 0 1 0 0 0 0 0 0 -1 0 0 0 0 0 0 0 0 0 0 0 0 0 0 0 0 0 0 0 0 0 0 0 0 0 0 0 0 -1 0 0 0 -1 1 0 0 0 0 0 0 0 0 0 1 -1 1 0 0 0 0 1 0 -1 0 0 1 0 0 0 0 0 0 0 0 0 0 0 0 0 0 0 0 1 0 -1 0 0 0 0 0 0 0 0 0 0 0 0 0 0 0 0 0 0 0 0 0 1 0 0 0 0…	-10		1264.68	47.9826	9.61886	5.84619	5.5415	45045	5.23671e-11	7.90951e-07	22.3364	31.2153	3.80402e-13	0.47872	19721.9	10724.3	7956.71
mol	pH	patch_hyd	patch_hyd_1	patch_hyd_2	patch_hyd_3	patch_hyd_4	patch_hyd_5	patch_hyd_n	patch_pos	patch_pos_1	patch_pos_2	patch_pos_3	patch_pos_4	patch_pos_5	patch_pos_n	patch_neg	patch_neg_1	patch_neg_2	patch_neg_3	patch_neg_4	patch_neg_5	patch_neg_n	patch_ion	patch_ion_1	patch_ion_2	patch_ion_3	patch_ion_4	patch_ion_5	patch_ion_n	ens_bb_pKa	ens_sc_pKa	ens_res_charge	ens_charge	ens_pI	ens_dipole	mass	debye	pI_seq	pI_3D	coeff_280	coeff_fric	coeff_diff	r_gyr	r_solv	sed_const	eccen	asa_vdw	asa_hyd	asa_hph
3MQL	7.4	770	130	260	390	460	520	10	470	70	130	190	250	300	9	700	70	140	210	270	330	14	1170	70	140	210	280	340	23	#NAME?	#NAME?	1 0 -1 0 0 0 -1 0 0 0 0 0 0 0 0 0 0 0 0 1 0 0 0 0 1 0 0 0 0 0 0 0 0 0 0 0 0 0 0 -1 0 0 0 0 0 0 0 0 0 0 0 0 0 -1 0 0 0 0 0 0 0 0 0 0 1 0 0 0 0 0 0 0 -1 0 1 0 -1 0 0 0 0 0 0 0 0 0 0 0 -1 0 -1 0 1 0 0 0 0 0 -1 0 0 0 0 0 0 0 1 0 0 0 0 0 0 0 0 0 0 0 0 0 0 0 0 0 0 0 0 0 -1 0 0 0 -1 0 1 1 -1 0 0 1 0 0 0 0 0 0 0 0 -1 0 -1 0 1 0 0 0 0 0 0 0 0 0 -1 -1 0 0 0 0 0 -1 0 0 0 0 1 0 0 -1 0 0 -1 1 0 0 -1 0 0 0 0 0…	-6		212.206	23.9877	9.61886	5.31299	5.35107	46380	4.12442e-11	1.00426e-06	19.8004	24.5851	2.41458e-13	0.688693	12540.1	5868.02	6004.64
mol	pH	patch_hyd	patch_hyd_1	patch_hyd_2	patch_hyd_3	patch_hyd_4	patch_hyd_5	patch_hyd_n	patch_pos	patch_pos_1	patch_pos_2	patch_pos_3	patch_pos_4	patch_pos_5	patch_pos_n	patch_neg	patch_neg_1	patch_neg_2	patch_neg_3	patch_neg_4	patch_neg_5	patch_neg_n	patch_ion	patch_ion_1	patch_ion_2	patch_ion_3	patch_ion_4	patch_ion_5	patch_ion_n	ens_bb_pKa	ens_sc_pKa	ens_res_charge	ens_charge	ens_pI	ens_dipole	mass	debye	pI_seq	pI_3D	coeff_280	coeff_fric	coeff_diff	r_gyr	r_solv	sed_const	eccen	asa_vdw	asa_hyd	asa_hph
4ACQ	7.4	12450	230	450	670	880	1080	124	11650	330	620	910	1120	1280	186	15400	210	410	610	800	950	230	27050	330	620	910	1120	1330	416	-Inf -Inf -Inf -Inf -Inf -Inf -Inf -Inf -Inf -Inf -Inf -Inf -Inf -Inf -Inf -Inf -Inf -Inf -Inf -Inf -Inf -Inf -Inf -Inf -Inf -Inf -Inf -Inf -Inf -Inf -Inf -Inf -Inf -Inf -Inf -Inf -Inf -Inf -Inf -Inf -Inf -Inf -Inf -Inf -Inf -Inf -Inf -Inf -Inf -Inf -Inf -Inf -Inf -Inf -Inf -Inf -Inf -Inf -Inf -Inf -Inf -Inf -Inf -Inf -Inf -Inf -Inf -Inf -Inf -Inf -Inf -Inf -Inf -Inf -Inf -Inf -Inf -Inf -Inf -Inf…	-Inf -Inf -Inf -Inf -Inf -Inf -Inf -Inf -Inf -Inf -Inf -Inf -Inf -Inf -Inf -Inf -Inf -Inf -Inf -Inf -Inf -Inf -Inf -Inf -Inf -Inf -Inf -Inf -Inf -Inf -Inf -Inf -Inf -Inf -Inf -Inf -Inf -Inf -Inf -Inf -Inf -Inf -Inf -Inf -Inf -Inf -Inf -Inf -Inf -Inf -Inf -Inf -Inf -Inf -Inf -Inf -Inf -Inf -Inf -Inf -Inf -Inf -Inf -Inf -Inf -Inf -Inf -Inf -Inf -Inf -Inf -Inf -Inf -Inf -Inf -Inf -Inf -Inf -Inf -Inf…	0 0 0 1 1 0 0 0 0 0 0 0 0 0 0 0 0 0 -1 0 0 -1 1 0 0 0 0 0 0 0 0 0 -1 0 0 0 0 0 0 0 0 -1 0 0 1 0 0 1 0 0 0 0 -1 0 -1 0 -1 0 -1 0 0 0 0 0 0 0 0 0 0 0 0 0 0 0 -1 -1 0 0 0 0 0 0 0 0 1 0 0 0 0 -1 0 1 1 1 0 0 0 0 0 1 0 -1 -1 0 0 0 0 0 0 0 -1 1 0 0 0 1 0 0 0 0 0 1 0 1 0 0 0 0 -1 -1 0 0 0 0 0 0 -1 0 0 0 0 0 0 0 0 -1 0 1 0 0 1 0 0 0 0 0 0 0 0 0 -1 0 0 0 1 0 0 0 0 0 0 0 0 -1 0 0 0 0 0 0 1 0 0 0 0 0 0 0 0 0…	-74		350.265	566.876	9.61886	6.27783	6.1001	542645	1.45928e-10	2.83837e-07	63.8383	86.9857	1.61274e-12	0.663813	221089	126994	82392.4
mol	pH	patch_hyd	patch_hyd_1	patch_hyd_2	patch_hyd_3	patch_hyd_4	patch_hyd_5	patch_hyd_n	patch_pos	patch_pos_1	patch_pos_2	patch_pos_3	patch_pos_4	patch_pos_5	patch_pos_n	patch_neg	patch_neg_1	patch_neg_2	patch_neg_3	patch_neg_4	patch_neg_5	patch_neg_n	patch_ion	patch_ion_1	patch_ion_2	patch_ion_3	patch_ion_4	patch_ion_5	patch_ion_n	ens_bb_pKa	ens_sc_pKa	ens_res_charge	ens_charge	ens_pI	ens_dipole	mass	debye	pI_seq	pI_3D	coeff_280	coeff_fric	coeff_diff	r_gyr	r_solv	sed_const	eccen	asa_vdw	asa_hyd	asa_hph
4ENZ	7.4	1510	120	240	350	450	540	20	1660	110	210	310	410	500	29	3190	210	410	600	740	870	45	4850	210	410	600	740	870	74	#NAME?	#NAME?	0 0 0 0 0 0 0 0 0 0 0 0 0 0 0 0 0 0 0 2 -1 1 0 0 0 0 0 0 0 -1 0 0 0 -1 0 0 0 -1 0 0 -1 1 1 0 0 0 0 -1 0 -1 0 0 0 0 0 0 0 0 0 0 -1 1 0 0 1 0 0 1 1 0 0 0 0 0 0 0 -1 -1 0 0 1 0 0 0 -1 1 0 0 0 0 0 0 0 0 0 0 0 1 0 -1 0 0 -1 1 0 0 0 0 0 1 0 0 0 0 1 0 0 0 0 0 0 0 0 0 0 0 0 1 -1 0 -1 0 0 0 0 0 -1 0 0 0 -1 0 0 1 0 -1 -1 1 0 0 0 0 -1 0 0 0 0 0 0 0 0 0 -1 -1 0 0 0 0 -1 0 -1 0 0 0 0 0 1 0 0 0 0 0 0 -1 0 0 1 …	-26		3601.07	118.844	9.61886	5.37646	4.94482	193495	7.04506e-11	5.87927e-07	28.4687	41.9946	7.00338e-13	0.941207	36084.6	18020.9	16003.5
mol	pH	patch_hyd	patch_hyd_1	patch_hyd_2	patch_hyd_3	patch_hyd_4	patch_hyd_5	patch_hyd_n	patch_pos	patch_pos_1	patch_pos_2	patch_pos_3	patch_pos_4	patch_pos_5	patch_pos_n	patch_neg	patch_neg_1	patch_neg_2	patch_neg_3	patch_neg_4	patch_neg_5	patch_neg_n	patch_ion	patch_ion_1	patch_ion_2	patch_ion_3	patch_ion_4	patch_ion_5	patch_ion_n	ens_bb_pKa	ens_sc_pKa	ens_res_charge	ens_charge	ens_pI	ens_dipole	mass	debye	pI_seq	pI_3D	coeff_280	coeff_fric	coeff_diff	r_gyr	r_solv	sed_const	eccen	asa_vdw	asa_hyd	asa_hph
4X0L	7.4	1260	390	760	860	960	1030	9	1690	240	380	490	590	670	26	1000	100	180	250	310	370	20	2690	240	380	490	590	690	46	#NAME?	#NAME?	1 0 0 0 0 -1 1 0 0 0 1 0 0 0 0 1 0 0 0 0 0 0 -1 0 0 0 -1 0 0 -1 1 0 0 0 0 0 0 0 0 1 0 0 0 0 0 0 -1 0 0 0 0 0 0 0 0 1 0 0 0 1 1 0 0 -1 0 0 0 0 0 0 0 0 0 -1 -1 0 0 0 0 0 0 0 0 0 -1 0 0 0 0 1 0 1 0 -1 0 0 0 0 1 0 0 0 0 0 0 0 0 0 0 0 0 0 0 0 0 -1 0 0 0 0 0 0 0 0 0 -1 1 0 0 0 0 0 0 0 0 0 0 0 1 0 0 0 1 0 0 0 -1 -1 1 0 0 0 0 0 0 0 0 1 0 0 0 -1 -1 0 0 0 -1 0 0 0 1 0 0 0 0 0 0 0 0 0 1 0 0 -1 0 0 0 -1 0 0 …	-6		619.458	61.4427	9.61886	7.18115	8.51416	69705	5.42996e-11	7.62801e-07	23.9412	32.3672	4.69775e-13	0.47863	21328.3	11687.7	8337.49
mol	pH	patch_hyd	patch_hyd_1	patch_hyd_2	patch_hyd_3	patch_hyd_4	patch_hyd_5	patch_hyd_n	patch_pos	patch_pos_1	patch_pos_2	patch_pos_3	patch_pos_4	patch_pos_5	patch_pos_n	patch_neg	patch_neg_1	patch_neg_2	patch_neg_3	patch_neg_4	patch_neg_5	patch_neg_n	patch_ion	patch_ion_1	patch_ion_2	patch_ion_3	patch_ion_4	patch_ion_5	patch_ion_n	ens_bb_pKa	ens_sc_pKa	ens_res_charge	ens_charge	ens_pI	ens_dipole	mass	debye	pI_seq	pI_3D	coeff_280	coeff_fric	coeff_diff	r_gyr	r_solv	sed_const	eccen	asa_vdw	asa_hyd	asa_hph
5EBB	7.4	3100	230	460	680	850	1010	34	2410	150	260	370	470	570	38	3680	280	550	810	1030	1230	45	6090	280	550	810	1030	1230	83	#NAME?	#NAME?	1 0 0 0 0 0 0 0 0 0 0 -1 0 0 0 -1 0 0 0 0 0 0 -1 -1 0 0 1 0 0 0 0 0 1 0 0 0 0 0 0 0 0 0 0 0 -1 0 0 0 -1 0 0 0 0 0 0 0 0 0 0 -1 0 0 1 0 0 0 0 -1 0 0 0 0 0 0 0 0 -1 0 0 0 0 0 0 0 0 -1 0 0 0 -1 0 0 0 0 0 0 0 0 0 0 0 0 0 0 0 0 0 0 0 0 0 0 0 0 0 0 0 0 0 -1 0 0 0 0 -1 0 0 0 0 0 0 0 1 0 0 0 0 0 0 0 0 0 1 0 0 0 -1 -1 -1 0 0 0 0 0 1 1 0 0 0 0 0 0 1 0 0 0 0 0 0 0 1 0 0 0 0 0 0 0 0 0 0 0 0 0 0 0 0 0 0 1 0 -…	-27		595.694	142.343	9.61886	4.93213	4.67822	228000	7.73726e-11	5.35329e-07	34.3514	46.1207	7.63777e-13	0.991123	44703.5	24403.5	18310.9
[truncated: 20 more columns]
