# Supplementary material for: Methacrylate Coatings for Titanium Surfaces to Optimize Biocompatibility
Source: Micromachines (Basel). 2020 Jan 13;11(1):87. doi: 10.3390/mi11010087 (PMC7019220; doi:10.3390/mi11010087)
Supplement: Supplementary file 1 [file micromachines-11-00087-s001.zip › S18a.xlsx]

## Sheet: EmpData
			ng/cm^2	ug/mm^2		ATP/RLU	%Ti
Histatin 5	DSHAKRHHGYKRKFHEKHHSHRGY	158	55.8304	0.000558304
minTBP-1 & Histatin 5	RKLPDAPDSHAKRHHGYKRKFHEKHHSHRGY	462	163.251	0.00163251	90	217241	0.234375
Lactoferricin	FQWQRNMRKVR	102	36.0424	0.000360424
minTBP-1 & Lactoferricin	RKLPDAPGGFQWQRNMRKVR	424	149.823	0.00149823	70	168966	0.182292
					384	926897	1
		200	566			1400000	580
					1e-05
Masao Yoshinari , Tetsuo Kato , Kenichi Matsuzaka , Tohru Hayakawa
& Kiyotaka Shiba (2010) Prevention of biofilm formation on titanium surfaces modified with
conjugated molecules comprised of antimicrobial and titanium-binding peptides, Biofouling, 26:1,
103-110, DOI: 10.1080/08927010903216572

## Sheet: ChemOpt
mol	AM1_dipole	AM1_E	AM1_Eele	AM1_HF	AM1_HOMO	AM1_IP	AM1_LUMO	apol	ASA	ASA+	ASA-	ASA_H	ASA_P	ast_fraglike	ast_fraglike_ext	ast_violation	ast_violation_ext	a_acc	a_acid	a_aro	a_base	a_count	a_don	a_donacc	a_heavy	a_hyd	a_IC	a_ICM	a_nB	a_nBr	a_nC	a_nCl	a_nF	a_nH	a_nI	a_nN	a_nO	a_nP	a_nS	balabanJ	BCUT_PEOE_0	BCUT_PEOE_1	BCUT_PEOE_2	BCUT_PEOE_3	BCUT_SLOGP_0	BCUT_SLOGP_1	BCUT_SLOGP_2	BCUT_SLOGP_3	BCUT_SMR_0
TLcf	0							373.228	3192.72	2299.15	893.572	1840.12	1352.6	0	0	3	5	22	4	15	15	351	21	43	172	80	585.247	1.66737	0	0	107	0	0	179	0	38	26	0	1	1.33992	-2.69309	-0.542777	0.468456	2.75031	-3.3087	-0.502064	0.395271	2.71284	-2.45699
THIS5	0							570.93	4632.45	0	0	4632.45	0	0	0	3	5	48	8	53	18	532	46	94	272	123	894.048	1.68054	0	0	168	0	0	260	0	62	42	0	0	0.697423	-2.69309	-0.570127	0.579931	2.75049	-3.3087	-0.53808	0.574304	2.71284	-2.45699
Lcf	0							237.458	2081.54	0	0	2081.54	0	0	0	3	5	13	2	15	11	222	14	27	109	52	371.033	1.67132	0	0	68	0	0	113	0	25	15	0	1	1.99146	-2.68902	-0.542882	0.48846	2.69641	-3.31156	-0.514512	0.424714	2.66994	-2.44821
HIS5	0							450.005	3726.25	0	0	3726.25	0	0	0	3	5	41	6	53	14	417	41	82	217	97	706.645	1.69459	0	0	133	0	0	200	0	51	33	0	0	0.836411	-2.6828	-0.596705	0.646369	2.69444	-3.30875	-0.557924	0.600284	2.67032	-2.44766
[truncated: 455 more columns]

## Sheet: TLcf
Chain	Res	UID	res_ASA	res_exp	res_charge	propKa	res_hyd	res_pos	res_neg	res_tot	res_oth	ens_res_charge	ens_sc_pKa	ens_bb_pKa
TBP-Lactoferricin	ARG	1	262.4	97.17	1.25	7.09		89.4		154.3	64.9	2
TBP-Lactoferricin	LYS	2	144.9	61.55	1.07	10.01		7.3		102.1	94.8	1
TBP-Lactoferricin	LEU	3	146.4	64.54	0		59.5			93.4	33.9
TBP-Lactoferricin	PRO	4	111.8	65.12	-0.14		18.7	1.8		75.9	55.4
TBP-Lactoferricin	ASP	5	62.2	35.22	-1.03	3.35				49.9	49.9	-1
TBP-Lactoferricin	ALA	6	102.4	74.62	0.08					63.6	63.6
TBP-Lactoferricin	PRO	7	138	80.38	-0.14					83.6	83.6
TBP-Lactoferricin	GLY	8	76.9	76.66	0.09					51.4	51.4
TBP-Lactoferricin	GLY	9	74.8	74.6	0.09					52.6	52.6
TBP-Lactoferricin	PHE	10	227.8	86.91	0.06		84.7			141.7	57.1
TBP-Lactoferricin	GLN	11	169.7	84.9	0.04					112.7	112.7
TBP-Lactoferricin	TRP	12	257.3	82.72	0.05		93.7			163.9	70.2
TBP-Lactoferricin	GLN	13	156.4	78.27	0.04					109.2	109.2
TBP-Lactoferricin	ARG	14	195.2	72.28	1.1	12.15				138.2	138.2	1
TBP-Lactoferricin	ASN	15	140.1	81.13	0.08					86.9	86.9
TBP-Lactoferricin	MET	16	163.4	66.8	0.03					108.7	108.7
TBP-Lactoferricin	ARG	17	186.3	68.99	0.21	6.79				130.2	130.2	1
TBP-Lactoferricin	LYS	18	177.3	75.3	1.07	10.5		43.6		113.9	70.2	1
TBP-Lactoferricin	VAL	19	142.2	72.78	-0.03					88.6	88.6
TBP-Lactoferricin	ARG	20	282.6	104.64	-0.89	7.71		48.1		160.8	112.7

## Sheet: THIS5
Chain	Res	UID	res_ASA	res_exp	res_charge	propKa	res_hyd	res_pos	res_neg	res_tot	res_oth	ens_res_charge	ens_sc_pKa	ens_bb_pKa
THIS5	ARG	1	269	99.61	2.03	10.07		101.1		155.1	54	2
THIS5	LYS	2	144	61.16	1	9.66		8.8		102.5	93.7	1
THIS5	LEU	3	166.4	73.33	-0.05		60.6			94.9	34.3
THIS5	PRO	4	108.3	63.06	-0.18		2.8	2.2		73	68
THIS5	ASP	5	88.4	50.03	-1.11	3.45				64.8	64.8	-1
THIS5	ALA	6	96.8	70.54	0.03					66.3	66.3
THIS5	PRO	7	134	78.06	-0.18					82.6	82.6
THIS5	ASP	8	150	84.89	-1.11	3.16			37.4	93.7	56.3	-1
THIS5	SER	9	112.8	77.39	-0.03				7.7	69.4	61.6
THIS5	HIS	10	187.8	85.39	0.1	6.43			0.8	120.8	120
THIS5	ALA	11	109.6	79.84	0.03					62.1	62.1
THIS5	LYS	12	198.9	84.46	1	10.43		43.1		130.4	87.4	1
THIS5	ARG	13	193.6	71.7	1	12.29				130.4	130.4	1
THIS5	HIS	14	168.3	76.54	0.08	6.36		1.1		106.4	105.3
THIS5	HIS	15	125.1	56.91	0.07	6.29				92.8	92.8
THIS5	GLY	16	60.9	60.75	0.03					40.9	40.9
THIS5	TYR	17	192.9	73	0	10.07	54.1			134.1	79.9
THIS5	LYS	18	197.1	83.7	1.01	10.5		45.8		125.4	79.6	1
THIS5	ARG	19	165.7	61.35	1	12.22				126.2	126.2	1
THIS5	LYS	20	152.9	64.92	1	9.94		33.6		112.8	79.2	1
THIS5	PHE	21	150.5	57.42	0.01			2.8	2.3	107.9	102.8
THIS5	HIS	22	151	68.69	0.1	6.43		2.2		98.7	96.5
THIS5	GLU	23	152.2	73.37	-1.08	4.5			37.9	98.7	60.7	-1
THIS5	LYS	24	145.2	61.67	1	9.8				112.3	112.3	1
THIS5	HIS	25	198.6	90.33	0.1	6.43				115	115
THIS5	HIS	26	149.6	68.04	0.05	6.15				91.7	91.7
THIS5	SER	27	88.6	60.76	-0.03					65	65
THIS5	HIS	28	179	81.42	0.08	6.36				111.9	111.9
THIS5	ARG	29	145.9	54.04	1	11.52				113.8	113.8	1
THIS5	GLY	30	81.7	81.46	0.03					45.7	45.7
THIS5	TYR	31	264.7	100.15	-2	6.23				142.6	142.6	-1

## Sheet: Lcf
Chain	Res	UID	res_ASA	res_exp	res_charge	propKa	res_hyd	res_pos	res_neg	res_tot	res_oth	ens_res_charge	ens_sc_pKa	ens_bb_pKa
Lcf	PHE	1	262.1	100.02	1.1	7.93	69.2	44.9		149.5	35.4	1
Lcf	GLN	2	169.5	84.8	0.06		0	1.2		110.6	109.4
Lcf	TRP	3	223.1	71.71	0.07		93.6			152.9	59.2
Lcf	GLN	4	161	80.55	0.06		0.1			111.5	111.4
Lcf	ARG	5	194.8	72.13	0.31	6.81		33.5		135.3	101.8	1
Lcf	ASN	6	146	84.57	0.1					90.4	90.4
Lcf	MET	7	145.4	59.45	0.05			3.1		106.2	103.1
Lcf	ARG	8	193.7	71.71	0.25	6.79		3.6		132.1	128.6	1
Lcf	LYS	9	174.9	74.26	1.1	10.5		45.3		115.5	70.2	1
Lcf	VAL	10	146.1	74.77	-0.01					90.1	90.1
Lcf	ARG	11	278.3	103.04	-0.84	7.71		49		163.7	114.7

## Sheet: HIS5
Chain	Res	UID	res_ASA	res_exp	res_charge	propKa	res_hyd	res_pos	res_neg	res_tot	res_oth	ens_res_charge	ens_sc_pKa	ens_bb_pKa
HIS5	ASP	1	218.6	123.74	-0.19	5.4			31.4	106.3	74.9
HIS5	SER	2	118.7	81.4	-0.08				9.3	75.1	65.8
HIS5	HIS	3	175.8	79.96	0.01	6.36				115.6	115.6
HIS5	ALA	4	108.2	78.82	-0.03					61	61
HIS5	LYS	5	194.3	82.53	0.94	10.43		43.1		127.4	84.3	1
HIS5	ARG	6	189.7	70.23	0.92	12.29				131.1	131.1	1
HIS5	HIS	7	178.7	81.27	0.01	6.36		1		106.9	105.9
HIS5	HIS	8	124.6	56.66	0	6.29				91.8	91.8
HIS5	GLY	9	61.1	60.96	-0.03					41.1	41.1
HIS5	TYR	10	202.6	76.65	-0.06	10.07	54.9			133.9	79
HIS5	LYS	11	196.3	83.37	0.94	10.5		45.8		124.4	78.6	1
HIS5	ARG	12	169.1	62.62	0.92	12.15				127.2	127.2	1
HIS5	LYS	13	157.2	66.76	0.94	10.15		34.5		112.6	78.1	1
HIS5	PHE	14	152	58	-0.05				4.7	109.6	104.9
HIS5	HIS	15	153.1	69.6	0.04	6.5		1.1		100.9	99.8
HIS5	GLU	16	144.1	69.45	-1.15	4.64			34.1	93.8	59.7	-1
HIS5	LYS	17	160.5	68.14	0.94	10.01				115	115	1
HIS5	HIS	18	187.6	85.33	0.02	6.43				112.4	112.4
HIS5	HIS	19	136.7	62.17	0.04	6.5				94.1	94.1
HIS5	SER	20	109.7	75.24	-0.08					69.1	69.1
HIS5	HIS	21	172.9	78.64	0.02	6.43				115.3	115.3
HIS5	ARG	22	153.1	56.69	0.92	11.52				117.8	117.8	1
HIS5	GLY	23	81.8	81.53	-0.03					45.5	45.5
HIS5	TYR	24	267.3	101.14	-2.07	6.27				143.1	143.1	-1
