# Supplementary material for: Methacrylate Coatings for Titanium Surfaces to Optimize Biocompatibility
Source: Micromachines (Basel). 2020 Jan 13;11(1):87. doi: 10.3390/mi11010087 (PMC7019220; doi:10.3390/mi11010087)
Supplement: Supplementary file 1 [file micromachines-11-00087-s001.zip › S19/ChemoInformaticsData_mod_bact_pred.csv]

mol	bact	apol	ASA	ASA+	ASA-	ASA_H	ASA_P	a_acc	a_acid	a_aro	a_base	a_count	a_don	a_donacc	a_heavy	a_hyd	a_IC	a_ICM	a_nC	a_nH	a_nN	a_nO	a_nS	balabanJ	BCUT_PEOE_0	BCUT_PEOE_1	BCUT_PEOE_2	BCUT_PEOE_3	BCUT_SLOGP_0	BCUT_SLOGP_1	BCUT_SLOGP_2	BCUT_SLOGP_3	BCUT_SMR_0	BCUT_SMR_1	BCUT_SMR_2	BCUT_SMR_3	bpol	b_1rotN	b_1rotR	b_ar	b_count	b_double	b_heavy	b_max1len	b_rotN	b_rotR	b_single	CASA+	CASA-
253L (Lysozyme)		2808.7622	8718.4492	0	0	8718.4492	0	206	36	98	53	2643	206	412	1306	616	4402.2861	1.6656399	823	1337	238	240	5	0.37631631	-2.7061777	-0.54973859	0.46620643	2.7515554	-3.3092694	-0.52870142	0.39390323	2.7067144	-2.4599721	-0.33106458	0.640486	3.0034232	1757.1658	636	0.47963801	101	2663	211	1326	6	809	0.61010557	2351	0	0
4Y99 (Cardiac Troponin)		6170.5225	21397.191	0	0	21397.191	0	425	160	138	112	5755	418	843	2872	1300	9704.6426	1.6862975	1780	2883	498	579	12	0.059841789	-2.7098956	-0.54981971	0.43639469	2.7594416	-3.3209023	-0.4966071	0.39303875	2.7031512	-2.4649971	-0.31825614	0.5826233	3.0102422	3855.9238	1467	0.5072614	139	5775	489	2892	6	1836	0.63485479	5147	0	0
1NCX (Troponin C)		3001.2534	10788.826	0	0	10788.826	0	341	96	71	31	2938	340	681	1433	568	5046.9263	1.7178102	781	1505	202	435	13	-0.026297925	-2.7086499	-0.54981971	0.43678108	2.7461398	-3.3055229	-0.49960065	0.3930881	2.6983356	-2.4577889	-0.32499525	0.58973324	2.9962914	1720.4825	646	0.50194252	71	2792	223	1287	6	812	0.63092464	2498	0	0
MeTroponin1		1479.0846	8531.2559	0	0	8531.2559	0	101	28	38	34	1401	93	194	684	317	2298.2449	1.6404318	434	717	123	127	0	1.1733594	-2.7116795	-0.54981971	0.46620843	2.714397	-3.3646488	-0.48260996	0.3556889	2.699086	-2.4701023	-0.31350505	0.57649565	2.9586859	932.68341	352	0.51014495	39	1407	116	690	11	440	0.63768119	1252	0	0
MeTroponin_min		4369.9077	21870.053	0	0	21870.053	0	303	106	114	122	4102	278	581	2052	923	6795.416	1.6566105	1302	2050	369	381	0	0.15506512	-2.9450507	-0.55092472	0.46638605	3.2071102	-3.4188235	-0.53807992	0.39390171	3.1694551	-2.5006316	-0.35567352	0.64145929	3.6133814	2728.3022	891	0.41577229	117	4193	325	2143	8	1107	0.51656556	3751	0	0
GelMA2		754.64734	5569.8091	0	0	5569.8091	0	59	34	15	27	702	49	108	375	133	1219.6492	1.7373919	221	327	81	73	0	0.26664403	-5.6189613	-0.58047831	0.43286991	4.6728115	-4.5291376	-0.5614602	0.4012922	5.7761502	-4.2302222	-0.33315158	0.60515833	6.0536423	470.8027	154	0.37378642	15	739	64	412	8	198	0.48058254	660	0	0
[truncated: 373 more columns]
