# Supplementary material for: Methacrylate Coatings for Titanium Surfaces to Optimize Biocompatibility
Source: Micromachines (Basel). 2020 Jan 13;11(1):87. doi: 10.3390/mi11010087 (PMC7019220; doi:10.3390/mi11010087)
Supplement: Supplementary file 1 [file micromachines-11-00087-s001.zip › S19/ChemoInformaticsData_mod_bact_tr.csv]

mol	bact	apol	ASA	ASA+	ASA-	ASA_H	ASA_P	a_acc	a_acid	a_aro	a_base	a_count	a_don	a_donacc	a_heavy	a_hyd	a_IC	a_ICM	a_nC	a_nH	a_nN	a_nO	a_nS	balabanJ	BCUT_PEOE_0	BCUT_PEOE_1	BCUT_PEOE_2	BCUT_PEOE_3	BCUT_SLOGP_0	BCUT_SLOGP_1	BCUT_SLOGP_2	BCUT_SLOGP_3	BCUT_SMR_0	BCUT_SMR_1	BCUT_SMR_2	BCUT_SMR_3	bpol	b_1rotN	b_1rotR	b_ar	b_count	b_double	b_heavy	b_max1len	b_rotN	b_rotR	b_single	CASA+	CASA-
TLcf	149.82332155477	373.22794	3192.7236	2299.1519	893.5719	1840.1213	1352.6024	22	4	15	15	351	21	43	172	80	585.24719	1.6673709	107	179	38	26	1	1.3399179	-2.6930881	-0.54277712	0.46845645	2.7503116	-3.3086984	-0.50206411	0.39527145	2.7128427	-2.4569867	-0.3556273	0.6424486	3.0029609	230.13205	83	0.47159091	16	355	28	176	8	104	0.59090906	311	123503.54	45731.223
THIS5	163.250883392226	570.93018	4632.4492	0	0	4632.4492	0	48	8	53	18	532	46	94	272	123	894.04779	1.6805409	168	260	62	42	0	0.69742286	-2.6930885	-0.57012707	0.57993066	2.7504852	-3.3086984	-0.53807992	0.57430393	2.7128429	-2.4569867	-0.44483128	0.72045082	3.0032272	346.37781	128	0.45229682	53	543	38	283	8	160	0.56537104	452	0	0
Lcf	36.0424028268551	237.45761	2081.5366	0	0	2081.5366	0	13	2	15	11	222	14	27	109	52	371.03287	1.6713192	68	113	25	15	1	1.9914633	-2.6890194	-0.54288226	0.48845965	2.6964149	-3.3115568	-0.5145123	0.42471391	2.6699402	-2.4482141	-0.3563394	0.64702243	2.9428043	140.84239	53	0.47747749	16	224	17	111	8	66	0.5945946	191	0	0
HIS5	55.8303886925795	450.00461	3726.25	0	0	3726.25	0	41	6	53	14	417	41	82	217	97	706.64526	1.6945931	133	200	51	33	0	0.83641148	-2.6827958	-0.5967052	0.64636856	2.6944413	-3.3087521	-0.55792439	0.60028428	2.6703215	-2.4476621	-0.45837978	0.74499565	2.9367707	266.88339	102	0.45132744	53	426	29	226	8	128	0.56637168	344	0	0
						105.5
[truncated: 373 more columns]
